## RESEARCH ARTICLE

# Treatment and care received by children hospitalized with COVID-19 in a large hospital network in the United States, February 2020 to September 2021

Candace C. Fuller<sup>1\*</sup>, Austin Cosgrove<sup>1</sup>, Mayura Shinde<sup>1</sup>, Edward Rosen<sup>1</sup>, Katie Haffenreffer<sup>1</sup>, Christian Hague<sup>1</sup>, Laura E. McLean<sup>2</sup>, Jonathan Perlin<sup>2</sup>, Russell E. Poland<sup>1,2</sup>, Kenneth E. Sands<sup>1,2</sup>, Natasha Pratt<sup>3</sup>, Patricia Bright<sup>3</sup>, Richard Platt<sup>1</sup>, Noelle M. Cocoros<sup>1</sup>, Sarah K. Dutcher<sup>3</sup>

**1** Department of Population Medicine, Harvard Medical School and Harvard Pilgrim Health Care Institute, Boston, Massachusetts, United States of America, **2** HCA Healthcare, Nashville, Tennessee, United States of America, **3** US Food and Drug Administration, Silver Spring, Maryland, United States of America

\* [Candace\\_Fuller@harvardpilgrim.org](mailto:Candace_Fuller@harvardpilgrim.org)

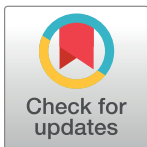

## OPEN ACCESS

**Citation:** Fuller CC, Cosgrove A, Shinde M, Rosen E, Haffenreffer K, Hague C, et al. (2023) Treatment and care received by children hospitalized with COVID-19 in a large hospital network in the United States, February 2020 to September 2021. *PLoS ONE* 18(7): e0288284. <https://doi.org/10.1371/journal.pone.0288284>

**Editor:** Paavani Atluri, Bay Area Hospital, North Bend Medical Center, UNITED STATES

**Received:** September 29, 2022

**Accepted:** June 22, 2023

**Published:** July 11, 2023

**Copyright:** This is an open access article, free of all copyright, and may be freely reproduced, distributed, transmitted, modified, built upon, or otherwise used by anyone for any lawful purpose. The work is made available under the [Creative Commons CC0](https://creativecommons.org/licenses/by/4.0/) public domain dedication.

**Data Availability Statement:** The data we used for this analysis belonged to, and remained in the possession of, third parties, i.e., the large hospital system that created and maintain the data. Therefore, we do not possess and cannot legally distribute these data which are held by HCA Healthcare. The lead author did not have special access privileges. The dataset used for this study included all pediatric admissions from 126 hospitals owned by HCA Healthcare between February 2020 to September 2021. Per our

## Abstract

We described care received by hospitalized children with COVID-19 or multi-system inflammatory syndrome (MIS-C) prior to the 2021 COVID-19 Omicron variant surge in the US. We identified hospitalized children <18 years of age with a COVID-19 or MIS-C diagnosis (COVID-19 not required), separately, from February 2020-September 2021 (n = 126 hospitals). We described high-risk conditions, inpatient treatments, and complications among these groups. Among 383,083 pediatric hospitalizations, 2,186 had COVID-19 and 395 had MIS-C diagnosis. Less than 1% had both COVID-19 and MIS-C diagnosis (n = 154). Over half were >6 years old (54% COVID-19, 70% MIS-C). High-risk conditions included asthma (14% COVID-19, 11% MIS-C), and obesity (9% COVID-19, 10% MIS-C). Pulmonary complications in children with COVID-19 included viral pneumonia (24%) and acute respiratory failure (11%). In reference to children with COVID-19, those with MIS-C had more hematological disorders (62% vs 34%), sepsis (16% vs 6%), pericarditis (13% vs 2%), myocarditis (8% vs 1%). Few were ventilated or died, but some required oxygen support (38% COVID-19, 45% MIS-C) or intensive care (42% COVID-19, 69% MIS-C). Treatments included: methylprednisolone (34% COVID-19, 75% MIS-C), dexamethasone (25% COVID-19, 15% MIS-C), remdesivir (13% COVID-19, 5% MIS-C). Antibiotics (50% COVID-19, 68% MIS-C) and low-molecular weight heparin (17% COVID-19, 34% MIS-C) were frequently administered. Markers of illness severity among hospitalized children with COVID-19 prior to the 2021 Omicron surge are consistent with previous studies. We report important trends on treatments in hospitalized children with COVID-19 to improve the understanding of real-world treatment patterns in this population.

agreement with HCA Healthcare, a hospital system based investigator became an author of this report after meeting ICMJE criteria. This confirms permission to use the dataset by HCA Healthcare. Others wishing to solicit use of these data, can apply to gain access to the data by contacting HCA Healthcare at: Director of Research Operations, Clinical Services Group, general office phone number (615) 344-5957, email: [Kimberly.Smith7@hcahealthcare.com](mailto:Kimberly.Smith7@hcahealthcare.com), or can contact Sentinel Systems [info@sentinelinitiative.org](mailto:info@sentinelinitiative.org) Data sharing requests will be addressed through a supervised data enclave, which will be maintained behind HCA's firewall on HCA servers for 3 years after the primary publication date. Requests are subject to approval based on planned use of the data, protection of privacy, and scope consistent with this study. The hospital system voluntarily participated in this study and would need to participate voluntarily in any subsequent study. If approved, members of the study team or HCA staff will perform the requested analysis for a fee and return aggregate data (e.g., counts, distributions). No individual patient-level results will be released. A processing fee will be assessed to cover this service.

**Funding:** This study was a Sentinel System study. The Sentinel System is funded by the U.S. Food and Drug Administration (FDA) through the Department of Health and Human Services contract number 75F40119D10037. CCF, AC, MS, ER, KH, CH, RP, NMC are employees of Harvard Pilgrim Health Care Institute, a non-profit organization that conducts work for government and private organizations, including pharmaceutical companies. JP, REP, KES, LEM are employees of HCA Healthcare. The funder had no role in data collection and analysis. Employees of the funding organization, the US FDA (NP, PB, SKD), contributed as coauthors to the design and conduct of the study; interpretation of the data; preparation, review, or approval of the manuscript; and decision to submit the manuscript for publication. The FDA had the opportunity to review the final manuscript but did not have the right to either prevent publication or direct it to a specific journal.

**Competing interests:** Our competing interests are below. This does not alter our adherence to PLOS ONE policies on sharing data and materials. I have read the journal's policy and the authors of this manuscript have the following competing interests: CCF, AC, MS, ER, KH, CH, RP, NMC are employees of Harvard Pilgrim Health Care Institute, a non-profit organization that conducts work for government and private organizations, including

## Introduction

Globally the COVID-19 pandemic has led to high morbidity and mortality in adults, but most reported SARS-CoV-2 infections in children have been described as mild or asymptomatic [1, 2]. Studies have reported low rates of COVID-19 associated hospitalization in children as compared to adults [3], with increases coinciding with wide circulation of the SARS-CoV-2 Delta variant and Omicron variants [4]. Although COVID-19 vaccines prevent severe consequences of SARS-CoV-2 infections and were first authorized for patients ages 16 years and older in December 2020 [5], they were not available until May 2021 for adolescents ages 12–15 years [6], October 2021 for children ages 5–11 years [7] and June 2022 for use in children ages 6 months through 5 years [8].

Rare but serious illnesses such as multi-system inflammatory syndrome (MIS-C) can occur in children following COVID-19 infection [9], and hospitalized children may require intensive care unit (ICU) support [10–12]. Although illness severity and medication use in hospitalized children has previously been characterized [13–17], less is known about potential COVID-19 treatments such as monoclonal antibodies that were under emergency use authorization through 2021. In addition, the National Institute of Health's COVID-19 treatment guidelines for children last updated in 2022 bases some recommendations on data for adult patients, in part due to inadequate clinical trial or observational study data on treatment of children with acute COVID-19 [18]. An improved understanding of real-world treatment patterns among children hospitalized with COVID-19 can inform regulators and future clinical trials designed to evaluate pediatric treatments for COVID-19.

The US Food and Drug Administration's (FDA) Sentinel System [19, 20] is an active post-marketing surveillance system that uses curated, quality checked administrative claims and electronic health record (EHR) data to study medical products, and has implemented an array of public health surveillance activities to respond to the COVID-19 pandemic [21]. This includes partnering with a large US hospital system to allow for near real-time monitoring of hospitalized patients with COVID-19 [21, 22]. As treatment patterns and illness severity may be influenced by both COVID-19 vaccination status and SARS-CoV-2 variant type, our objective was to describe characteristics, complications, and treatments administered to hospitalized children with evidence of COVID-19 or MIS-C diagnosis prior to the Omicron variant surge in December 2021 and widespread vaccination of children less than 12 years.

## Materials and methods

### Data sources and study population

This was a retrospective descriptive study among children <18 years hospitalized from February 20, 2020 through September 30, 2021. We used inpatient EHR data from HCA Healthcare [23] (n = 126 hospitals which provided pediatric care). Hospitals were in 18 states, with Texas, Florida, Virginia, and Colorado heavily represented. The study start date corresponds with the release of initial COVID-19 diagnostic coding guidelines [24].

We identified hospitalizations with a COVID-19 specific diagnosis code (International Classification of Diseases, Tenth Revision, Clinical Modification [ICD-10-CM], U07.1-COVID-19) which became available April 1, 2020, as well as codes for coronavirus infection that were in use prior to April 1, 2020 (ICD-10-CM, B97.29- Other coronavirus as the cause of diseases classified elsewhere; B34.2-Coronavirus infection, unspecified). As MIS-C can present sometime after an initial SARS-CoV-2 infection, we examined children with MIS-C diagnoses separately without requiring a COVID-19 diagnosis (M35.81-Multisystem

pharmaceutical companies. JP, REP, KES, LEM are employees of HCA Healthcare. Employees of the FDA (NP, PB, SKD) have declared that no competing interests exist.

Inflammatory Disorder, M35.8-Other specific systemic involvement of connective tissue). We included data on patients discharged and with complete billing only.

For reference, we also examined characteristics of all hospitalizations in children captured in the database. See [S1 Appendix](#) for a study design diagram.

## Patient characteristics and high-risk conditions

We examined patient demographics on admission and analyzed the frequency of admission by month across the study period. We examined conditions that may increase risk of serious complications from COVID-19, including cancer, chronic lung diseases, chronic cardiovascular disease (e.g., congenital heart disease), liver or renal disorders, immunocompromised state, diabetes, obesity, developmental disorders and smoking [25]. All conditions were identified via ICD-10-CM diagnosis codes documented throughout the hospitalization. We described the frequency of COVID-19 diagnosis among newborns delivered in these hospitals during the study period (i.e., live birth delivery).

We also assessed how often patients had SARS-CoV-2 polymerase chain reaction (PCR) tests performed within the hospital system. See [S2 Appendix](#) for applicable code lists.

## Treatments

We identified administrations of therapies for management of COVID-19 during hospitalization, including remdesivir, dexamethasone, and methylprednisolone, and examined the frequency of these administrations among children with COVID-19 or MIS-C diagnosis over time. We also examined use of antibiotics, antithrombotic therapies, and immune globulin. We used brand names, generic names, National Drug Codes (NDC), and ICD-10-CM procedure codes to identify medications (see [S3 Appendix](#) for medication search strategy and codes).

## Complications and illness severity markers

We described complications coded during the hospital stay, including pulmonary complications, inflammatory conditions, thromboembolic complications, hematological disorders, myocarditis, pericarditis, and sepsis. As hematological disorders included many conditions, we also examined the top 25 most common hematological diagnoses in this group. We also examined death in the hospital based on discharge disposition (i.e., discharged expired).

As markers of illness severity, we examined receipt of respiratory support during the stay, ICU stays, and length of stay. Respiratory support included supplemental oxygen (e.g., high flow nasal cannula, routine nasal cannula, nonrebreather mask, oxygen conserving device, simple mask), bilevel positive airway pressure (BiPAP), mechanical ventilation (MV), and extracorporeal membrane oxygenation (ECMO). Clinicians reviewed and classified standardized nursing documentation to identify supplemental oxygen and invasive mechanical ventilation. We identified ICU stays with revenue codes, and length of stay was calculated based on admission and discharge dates. See [S2 Appendix](#) for applicable code lists.

Data were fully anonymized (no individually identifiable data included) before accessed by a programmer on the study team. This Sentinel activity was a public health surveillance activity conducted under the authority of FDA and, accordingly, was not subject to Institutional Review Board oversight [26–28].

## Results

We observed 2,186 hospitalizations with a COVID-19 diagnosis and 395 with MIS-C diagnosis among 383,083 total pediatric hospitalizations. Thirty-nine percent of children with MIS-C diagnosis also had a COVID-19 diagnosis during the same hospitalization.

Fig 1 shows COVID-19 hospitalizations by month. We observed increases in pediatric hospitalization corresponding to known hospitalization surges during the pandemic including higher numbers of hospitalized children during the summer of 2021 [16]. In addition, 60% of hospitalized children with COVID-19 diagnosis in this analysis were <12 years of age. Fifty-eight percent of children with COVID-19 diagnosis had evidence of SARS-CoV-2 testing at the same hospital during their stay, and 85% of those had a positive PCR test. In contrast, just 10% of children with MIS-C diagnosis had a positive PCR test during their stay. Less than 1% of children with a COVID-19 diagnosis also had an MIS-C diagnosis ( $n = 154$ ).

## Characteristics of hospitalized children with COVID-19 or MIS-C diagnosis

Table 1 shows the characteristics of hospitalized children diagnosed with COVID-19 or MIS-C. Approximately 49% of children with COVID-19 diagnosis were female, and their median age was 7 years (interquartile range [IQR] 0–15 years). On admission, 60% of children with COVID-19 diagnosis were ages <12 years and 40% were 12–17 years. Among children with a COVID-19 diagnosis, we identified 129 (6%) newborns, which represented <1% of all deliveries in these hospitals during the study. Approximately 53% of children with COVID-19 were white, 17% black, and 24% other race, which was similar to all hospitalizations in the database (56% white, 16% black, 18% other race). Thirty-nine percent of children with COVID-19 diagnosis were of Hispanic ethnicity, while just 18% of all hospitalizations in the database were in children of Hispanic ethnicity. We observed regional variation in accordance with the distribution of the hospital network, with 38% of pediatric COVID-19

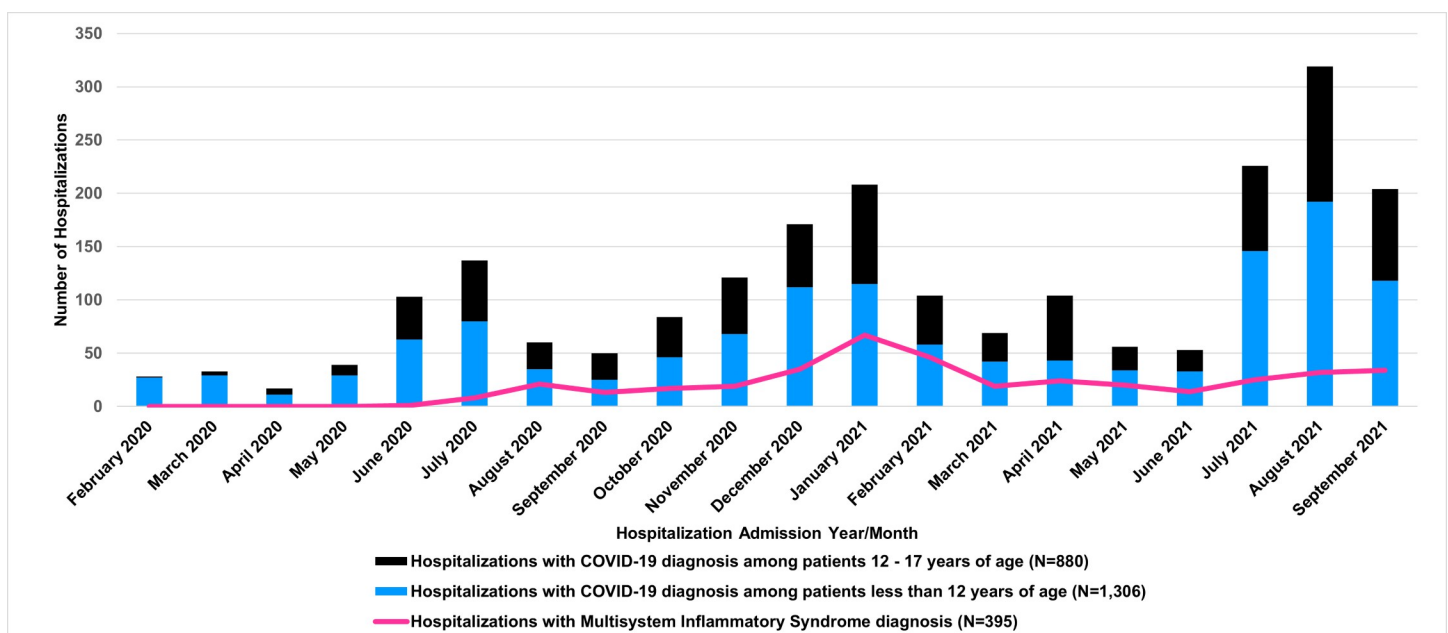

Fig 1. Pediatric hospitalizations with COVID-19 or multi-system inflammatory (MIS-C) diagnosis, February 20, 2020–September 30, 2021.

<https://doi.org/10.1371/journal.pone.0288284.g001>

**Table 1. Baseline characteristics of hospitalizations with COVID-19 or MIS-C diagnosis stratified by ICU stays or age, February 20, 2020 and September 30, 2021\*.**

|                                                                                                               | All hospitalizations (N = 383,083) | Hospitalizations with COVID-19 diagnosis (N = 2,186) | Hospitalizations with multisystem inflammatory syndrome diagnosis (N = 395) | Hospitalizations with COVID-19 diagnosis AND ICU admission (N = 917) | Hospitalizations with COVID-19 diagnosis among patients less than 12 years of age (N = 1,306) | Hospitalizations with COVID-19 diagnosis among patients 12–17 years of age (N = 880) |
|---------------------------------------------------------------------------------------------------------------|------------------------------------|------------------------------------------------------|-----------------------------------------------------------------------------|----------------------------------------------------------------------|-----------------------------------------------------------------------------------------------|--------------------------------------------------------------------------------------|
| <b>Total Patients</b>                                                                                         | 368,840                            | 2,146                                                | 390                                                                         | 910                                                                  | 1,286                                                                                         | 860                                                                                  |
|                                                                                                               | N (%)                              | N (%)                                                | N (%)                                                                       | N (%)                                                                | N (%)                                                                                         | N (%)                                                                                |
| <b>Age at admission</b>                                                                                       |                                    |                                                      |                                                                             |                                                                      |                                                                                               |                                                                                      |
| <1 year                                                                                                       | 323,388 (84%)                      | 621 (28%)                                            | 26 (7%)                                                                     | 186 (20%)                                                            | 621 (48%)                                                                                     | -                                                                                    |
| 1-<2 years                                                                                                    | 5,257 (1%)                         | 155 (7%)                                             | 26 (7%)                                                                     | 60 (7%)                                                              | 155 (12%)                                                                                     | -                                                                                    |
| 2-<6 years                                                                                                    | 9,374 (2%)                         | 221 (10%)                                            | 66 (17%)                                                                    | 100 (11%)                                                            | 221 (17%)                                                                                     | -                                                                                    |
| 6-< 12 years                                                                                                  | 10,843 (3%)                        | 309 (14%)                                            | 139 (35%)                                                                   | 158 (17%)                                                            | 309 (24%)                                                                                     | -                                                                                    |
| 12 -<18 years                                                                                                 | 34,029 (9%)                        | 880 (40%)                                            | 138 (35%)                                                                   | 413 (45%)                                                            | -                                                                                             | 880 (100%)                                                                           |
| <b>Sex</b>                                                                                                    |                                    |                                                      |                                                                             |                                                                      |                                                                                               |                                                                                      |
| Female                                                                                                        | 188,883 (49%)                      | 1,078 (49%)                                          | 175 (44%)                                                                   | 438 (48%)                                                            | 583 (45%)                                                                                     | 495 (56%)                                                                            |
| <b>Race</b>                                                                                                   |                                    |                                                      |                                                                             |                                                                      |                                                                                               |                                                                                      |
| White                                                                                                         | 215,138 (56%)                      | 1,152 (53%)                                          | 198 (50%)                                                                   | 492 (54%)                                                            | 686 (53%)                                                                                     | 466 (53%)                                                                            |
| Black                                                                                                         | 61,198 (16%)                       | 377 (17%)                                            | 85 (22%)                                                                    | 163 (18%)                                                            | 228 (18%)                                                                                     | 149 (17%)                                                                            |
| American Indian/ Alaska Native/ Hawaiian/ Pacific Islander                                                    | 1,359 (0%)                         | 11 (1%)                                              | 2 (1%)                                                                      | 6 (1%)                                                               | 3 (0%)                                                                                        | 8 (1%)                                                                               |
| Asian/Asian Indian                                                                                            | 19,883 (5%)                        | 32 (2%)                                              | 9 (2%)                                                                      | 13 (1%)                                                              | 20 (2%)                                                                                       | 12 (1%)                                                                              |
| Other                                                                                                         | 69,768 (18%)                       | 527 (24%)                                            | 92 (23%)                                                                    | 203 (22%)                                                            | 323 (25%)                                                                                     | 204 (23%)                                                                            |
| Unknown                                                                                                       | 15,565 (4%)                        | 87 (4%)                                              | 9 (2%)                                                                      | 40 (4%)                                                              | 46 (4%)                                                                                       | 41 (5%)                                                                              |
| <b>Ethnicity</b>                                                                                              |                                    |                                                      |                                                                             |                                                                      |                                                                                               |                                                                                      |
| Hispanic or Latino                                                                                            | 67,608 (18%)                       | 857 (39%)                                            | 136 (34%)                                                                   | 392 (43%)                                                            | 491 (38%)                                                                                     | 366 (42%)                                                                            |
| Unknown                                                                                                       | 157,287 (41%)                      | 241 (11%)                                            | 24 (6%)                                                                     | 87 (10%)                                                             | 178 (14%)                                                                                     | 63 (7%)                                                                              |
| <b>State</b>                                                                                                  |                                    |                                                      |                                                                             |                                                                      |                                                                                               |                                                                                      |
| Colorado                                                                                                      | 24,892 (7%)                        | 116 (5%)                                             | 25 (6%)                                                                     | 36 (4%)                                                              | 64 (5%)                                                                                       | 52 (6%)                                                                              |
| Florida                                                                                                       | 63,630 (17%)                       | 409 (19%)                                            | 63 (16%)                                                                    | 174 (19%)                                                            | 220 (17%)                                                                                     | 189 (22%)                                                                            |
| Other†                                                                                                        | 99,507 (26%)                       | 646 (30%)                                            | 160 (41%)                                                                   | 256 (28%)                                                            | 410 (31%)                                                                                     | 236 (27%)                                                                            |
| Tennessee                                                                                                     | 18,794 (5%)                        | 86 (4%)                                              | 16 (4%)                                                                     | 21 (2%)                                                              | 45 (3%)                                                                                       | 41 (5%)                                                                              |
| Texas                                                                                                         | 151,294 (40%)                      | 830 (38%)                                            | 123 (31%)                                                                   | 407 (44%)                                                            | 518 (40%)                                                                                     | 312 (36%)                                                                            |
| Virginia                                                                                                      | 24,794 (7%)                        | 99 (5%)                                              | 8 (2%)                                                                      | 23 (3%)                                                              | 49 (4%)                                                                                       | 50 (6%)                                                                              |
| <b>Live birth delivery or pregnancy</b>                                                                       |                                    |                                                      |                                                                             |                                                                      |                                                                                               |                                                                                      |
| Live birth delivery                                                                                           | 306,212 (80%)                      | 129 (6%)                                             | 1 (0%)                                                                      | 6 (1%)                                                               | 129 (10%)                                                                                     | 0 (0%)                                                                               |
| Pregnancy§                                                                                                    | 127 (0%)                           | 85 (4%)                                              | -                                                                           | 9 (1%)                                                               | -                                                                                             | 85 (10%)                                                                             |
| <b>High-risk conditions documented during the stay</b>                                                        |                                    |                                                      |                                                                             |                                                                      |                                                                                               |                                                                                      |
| Asthma                                                                                                        | 10,360 (3%)                        | 312 (14%)                                            | 45 (11%)                                                                    | 186 (20%)                                                            | 149 (11%)                                                                                     | 163 (19%)                                                                            |
| Chronic obstructive pulmonary disease                                                                         | 173 (0%)                           | 9 (0%)                                               | 2 (1%)                                                                      | 5 (1%)                                                               | 4 (0%)                                                                                        | 5 (1%)                                                                               |
| Cystic fibrosis                                                                                               | 157 (0%)                           | 1 (0%)                                               | 0 (0%)                                                                      | 0 (0%)                                                               | 0 (0%)                                                                                        | 1 (0%)                                                                               |
| Tuberculosis                                                                                                  | 32 (0%)                            | 3 (0%)                                               | 0 (0%)                                                                      | 2 (0%)                                                               | 2 (0%)                                                                                        | 1 (0%)                                                                               |
| Other chronic respiratory disorders (e.g., chronic respiratory disorders originating in the perinatal period) | 1,591 (0%)                         | 21 (1%)                                              | 9 (2%)                                                                      | 14 (2%)                                                              | 12 (1%)                                                                                       | 9 (1%)                                                                               |
| Diabetes                                                                                                      | 2,958 (1%)                         | 103 (5%)                                             | 7 (2%)                                                                      | 77 (8%)                                                              | 33 (3%)                                                                                       | 70 (8%)                                                                              |

(Continued)

Table 1. (Continued)

|                                                                                                                        | All hospitalizations (N = 383,083) | Hospitalizations with COVID-19 diagnosis (N = 2,186) | Hospitalizations with multisystem inflammatory syndrome diagnosis (N = 395) | Hospitalizations with COVID-19 diagnosis AND ICU admission (N = 917) | Hospitalizations with COVID-19 diagnosis among patients less than 12 years of age (N = 1,306) | Hospitalizations with COVID-19 diagnosis among patients 12–17 years of age (N = 880) |
|------------------------------------------------------------------------------------------------------------------------|------------------------------------|------------------------------------------------------|-----------------------------------------------------------------------------|----------------------------------------------------------------------|-----------------------------------------------------------------------------------------------|--------------------------------------------------------------------------------------|
| Heart failure                                                                                                          | 328 (0%)                           | 17 (1%)                                              | 17 (4%)                                                                     | 16 (2%)                                                              | 10 (1%)                                                                                       | 7 (1%)                                                                               |
| Cardiovascular disease‡                                                                                                | 7,355 (2%)                         | 260 (12%)                                            | 173 (44%)                                                                   | 184 (20%)                                                            | 140 (11%)                                                                                     | 120 (14%)                                                                            |
| Congenital heart disease                                                                                               | 16,026 (4%)                        | 96 (4%)                                              | 16 (4%)                                                                     | 48 (5%)                                                              | 73 (6%)                                                                                       | 23 (3%)                                                                              |
| Sickle cell disease or thalassemia                                                                                     | 704 (0%)                           | 29 (1%)                                              | 4 (1%)                                                                      | 12 (1%)                                                              | 18 (1%)                                                                                       | 11 (1%)                                                                              |
| Mental health conditions (e.g., depression, bi-polar disorder)                                                         | 13,651 (4%)                        | 159 (7%)                                             | 9 (2%)                                                                      | 59 (6%)                                                              | 9 (1%)                                                                                        | 150 (17%)                                                                            |
| Down syndrome                                                                                                          | 1,001 (0%)                         | 28 (1%)                                              | 0 (0%)                                                                      | 20 (2%)                                                              | 12 (1%)                                                                                       | 16 (2%)                                                                              |
| Liver and renal disorders                                                                                              | 4,347 (1%)                         | 138 (6%)                                             | 79 (20%)                                                                    | 75 (8%)                                                              | 75 (6%)                                                                                       | 63 (7%)                                                                              |
| Obesity                                                                                                                | 2,838 (1%)                         | 203 (9%)                                             | 38 (10%)                                                                    | 134 (15%)                                                            | 26 (2%)                                                                                       | 177 (20%)                                                                            |
| Immunocompromised state (e.g., diagnoses of primary immunodeficiency, HIV, or graft versus host related complications) | 2,232 (1%)                         | 147 (7%)                                             | 33 (8%)                                                                     | 83 (9%)                                                              | 79 (6%)                                                                                       | 68 (8%)                                                                              |
| Malignant cancer                                                                                                       | 1,738 (1%)                         | 30 (1%)                                              | 4 (1%)                                                                      | 14 (2%)                                                              | 20 (2%)                                                                                       | 10 (1%)                                                                              |

\*Includes discharges for final billed patients only. The analysis does not include inpatient stays for patients still admitted or not completely coded by the data pull date.

† Other includes states with less representation in the network: CA, GA, ID, IN, KS, KY, LA, MO, MS, NH, NV, SC, UT.

§ Defined with ICD-9-CM code O98. 51 (Other viral disease complicating pregnancy, childbirth, or the puerperium)

‡ Cardiovascular conditions included hospitalizations with diagnosis codes for myocardial infarction, angina pectoris, atherosclerosis, heart failure, aneurysm, and ischemic heart disease

<https://doi.org/10.1371/journal.pone.0288284.t001>

hospitalizations in Texas and 19% in Florida. The most recorded high-risk conditions were asthma (14%), cardiovascular diseases (12%), obesity (9%), immune compromising conditions (7%), liver and renal disorders (6%), and diabetes (5%).

In children with MIS-C, 44% were female, and the median age was 9 years (IQR 4–13 years). Characteristics were generally similar among children diagnosed with MIS-C compared to children with COVID-19, particularly with respect to underlying conditions, but diagnoses of hematologic disorders (62%), cardiovascular diseases (44%), and liver and renal disorders (20%) were more common. Among children with MIS-C and hematologic disorders, the most frequent diagnoses included thrombocytopenia (45%), decreased white blood cell counts (35%), and anemia (33%).

### Complications and markers of severity among children with COVID-19 or MIS-C diagnosis

**Table 2** summarizes complications among hospitalized children with a COVID-19 or MIS-C diagnosis. The most common pulmonary complications in children with a COVID-19 diagnosis were viral pneumonia (24%) and acute respiratory failure (11%). In reference to children with COVID-19 diagnosis, a higher proportion of some complications was observed in those with MIS-C diagnosis including hematologic conditions (62% vs 34%), sepsis (16% vs. 6%), pericarditis (13% vs. 2%), and myocarditis (8% vs. 1%). Viral pneumonia (9% vs. 24%) was less frequently documented in patients with MIS-C diagnosis than with a COVID-19 diagnosis. Less than 1% of children with a COVID-19 or MIS-C diagnosis had acute bronchitis or lower

**Table 2. Complications among hospitalizations with COVID-19 or MIS-C diagnosis receiving oxygen-related therapies delivery stratified by ICU stays and age, February 20, 2020–September 30, 2021\*.**

|                                                                                                                                                                                           | Hospitalizations with COVID-19 diagnosis (N = 2,186) | Hospitalizations with multisystem inflammatory syndrome diagnosis (N = 395) | Hospitalizations with COVID-19 diagnosis AND ICU admission (N = 917) | Hospitalizations with COVID-19 diagnosis among patients less than 12 years of age (N = 1,306) | Hospitalizations with COVID-19 diagnosis among patients 12–17 years of age (N = 880) |
|-------------------------------------------------------------------------------------------------------------------------------------------------------------------------------------------|------------------------------------------------------|-----------------------------------------------------------------------------|----------------------------------------------------------------------|-----------------------------------------------------------------------------------------------|--------------------------------------------------------------------------------------|
|                                                                                                                                                                                           | %                                                    | %                                                                           | %                                                                    | %                                                                                             | %                                                                                    |
| <b>Pulmonary complications</b>                                                                                                                                                            |                                                      |                                                                             |                                                                      |                                                                                               |                                                                                      |
| Viral pneumonia                                                                                                                                                                           | 519 (24%)                                            | 36 (9%)                                                                     | 307 (33%)                                                            | 215 (16%)                                                                                     | 304 (35%)                                                                            |
| Acute respiratory failure                                                                                                                                                                 | 244 (11%)                                            | 43 (11%)                                                                    | 205 (22%)                                                            | 96 (7%)                                                                                       | 148 (17%)                                                                            |
| Acute respiratory distress syndrome                                                                                                                                                       | 25 (1%)                                              | 10 (3%)                                                                     | 19 (2%)                                                              | 6 (0%)                                                                                        | 19 (2%)                                                                              |
| <b>Oxygen-related therapy</b>                                                                                                                                                             |                                                      |                                                                             |                                                                      |                                                                                               |                                                                                      |
| Bilevel positive airway pressure (BiPAP)                                                                                                                                                  | 75 (3%)                                              | 25 (6%)                                                                     | 66 (7%)                                                              | 29 (2%)                                                                                       | 46 (5%)                                                                              |
| Extracorporeal membrane oxygenation† (ECMO)                                                                                                                                               | 1 (0%)                                               | 1 (0%)                                                                      | 1 (0%)                                                               | 0 (0%)                                                                                        | 1 (0%)                                                                               |
| High flow                                                                                                                                                                                 | 309 (14%)                                            | 79 (20%)                                                                    | 266 (29%)                                                            | 143 (11%)                                                                                     | 166 (19%)                                                                            |
| Nasal cannula                                                                                                                                                                             | 673 (31%)                                            | 155 (39%)                                                                   | 408 (44%)                                                            | 340 (26%)                                                                                     | 333 (38%)                                                                            |
| Non-rebreather                                                                                                                                                                            | 77 (4%)                                              | 14 (4%)                                                                     | 60 (7%)                                                              | 25 (2%)                                                                                       | 52 (6%)                                                                              |
| Oxygen conserving device                                                                                                                                                                  | 5 (0%)                                               | 0 (0%)                                                                      | 3 (0%)                                                               | 0 (0%)                                                                                        | 5 (1%)                                                                               |
| Simple mask                                                                                                                                                                               | 195 (9%)                                             | 43 (11%)                                                                    | 105 (11%)                                                            | 125 (10%)                                                                                     | 70 (8%)                                                                              |
| <b>Other complications</b>                                                                                                                                                                |                                                      |                                                                             |                                                                      |                                                                                               |                                                                                      |
| Sepsis                                                                                                                                                                                    | 141 (6%)                                             | 65 (16%)                                                                    | 85 (9%)                                                              | 97 (7%)                                                                                       | 45 (5%)                                                                              |
| Myocarditis                                                                                                                                                                               | 25 (1%)                                              | 33 (8%)                                                                     | 20 (2%)                                                              | 8 (1%)                                                                                        | 17 (2%)                                                                              |
| Pericarditis                                                                                                                                                                              | 40 (2%)                                              | 51 (13%)                                                                    | 35 (4%)                                                              | 23 (2%)                                                                                       | 17 (2%)                                                                              |
| Myocarditis or pericarditis                                                                                                                                                               | 45 (2%)                                              | 57 (14%)                                                                    | 40 (4%)                                                              | 23 (2%)                                                                                       | 22 (3%)                                                                              |
| Hematological disorders                                                                                                                                                                   | 419 (34%)                                            | 209 (62%)                                                                   | 242 (37%)                                                            | 215 (34%)                                                                                     | 204 (34%)                                                                            |
| <b>Markers of illness severity</b>                                                                                                                                                        |                                                      |                                                                             |                                                                      |                                                                                               |                                                                                      |
| ICU admission                                                                                                                                                                             | 917 (42%)                                            | 272 (69%)                                                                   | 917 (100%)                                                           | 504 (39%)                                                                                     | 413 (47%)                                                                            |
| Invasive mechanical ventilation                                                                                                                                                           | 109 (5%)                                             | 36 (9%)                                                                     | 93 (10%)                                                             | 59 (5%)                                                                                       | 50 (6%)                                                                              |
| Respiratory support, including supplemental oxygen or BiPAP (High flow or Nasal cannula or Non-rebreather or Oxygen conserving device or Simple mask or Bilevel positive airway pressure) | 841 (39%)                                            | 180 (46%)                                                                   | 500 (55%)                                                            | 454 (35%)                                                                                     | 387 (44%)                                                                            |
| Death                                                                                                                                                                                     | 11 (1%)                                              | 3 (1%)                                                                      | 8 (1%)                                                               | 7 (1%)                                                                                        | 4 (0%)                                                                               |
| <b>Length of stay (days)</b>                                                                                                                                                              |                                                      |                                                                             |                                                                      |                                                                                               |                                                                                      |
| Mean (SD)                                                                                                                                                                                 | 5.9 (10.8)                                           | 6.9 (5.4)                                                                   | 6.7 (7.6)                                                            | 5.4 (8.6)                                                                                     | 6.8 (13.3)                                                                           |
| Median (interquartile range)                                                                                                                                                              | 3 (2–6)                                              | 6 (4–8)                                                                     | 5 (3–8)                                                              | 3 (2–5)                                                                                       | 4 (3–7)                                                                              |

\*Includes discharges for final billed patients only. The analysis does not include inpatient stays for patients still admitted or not completely coded by the data pull date.

† Please note only 15 of the 126 HCA Healthcare facilities contributing pediatric inpatient data to this manuscript use ECMO machines routinely

<https://doi.org/10.1371/journal.pone.0288284.t002>

respiratory infection, and less than 0.2% thromboembolic complications were observed. Among children with hematologic disorders, the most frequently diagnosed conditions included decreased white blood cell counts [e.g., neutropenia, lymphocytopenia] (40%), anemia (35%), and thrombocytopenia (22%).

Overall, the median length of stay (LOS) among children with a COVID-19 diagnosis (n = 2,185) was 3 days (interquartile range [IQR] 2–6 days), 42% were treated in the ICU and

0.5% were discharged expired. Regarding the receipt of oxygen-related therapy, 5% were mechanically ventilated and 39% were provided respiratory support (supplementary oxygen or BiPAP). Among children with an MIS-C diagnosis (n = 395) the median LOS was 6 days (IQR 4–8 days), 69% were treated in ICU, and 0.7% were discharged expired. A higher proportion of children with an MIS-C diagnosis than those with COVID-19 diagnosis received oxygen related therapy: 9% were mechanically ventilated and 45% were provided respiratory support.

Children with ICU admissions had markers of more severe illness than those without ICU admission (ICU admission: 10% MV, 53% oxygen use, <1% death; no ICU admission: 1% MV, 26% oxygen use, <1% death). Complications were more frequent among patients with ICU stays.

### Medications

Fig 2 shows the proportion of those diagnosed with COVID-19 or MIS-C over time who received selected medications. The most common agents used to treat hospitalized children with COVID-19 or MIS-C diagnosis during their stay included: methylprednisolone (COVID-19: 34%, MIS-C: 75%), dexamethasone (COVID-19: 25%, MIS-C: 15%), and remdesivir (COVID-19: 13%, MIS-C: 5%). Antibiotic use was also common in both patients with COVID-19 diagnosis (50%) and MIS-C (68%). We observed some utilization of anti-thrombotic medications such as low-molecular weight heparin (COVID-19: 17%, MIS-C: 34%), anti-platelet therapy (COVID-19: 6%, MIS-C: 53%), tissue plasminogen activator (COVID-19: 2%, MIS-C: 6%), and thrombin inhibitors (COVID-19: 2%, MIS-C: 6%). Immune globulin treatment was common in children with MIS-C diagnosis (COVID-19: 7% MIS-C: 67%).

In analyses of hospitalized children with COVID-19 diagnosis stratified by age, we noted higher proportions of children ages 12–17 had evidence of treatments to manage COVID-19 (remdesivir: 6% of those <12 years vs. 24% of those 12–17 years; dexamethasone: 17% in those <12 years vs. 36% in those 12–17 years); the exception was methylprednisolone, which was used more often in younger patients (44% in those <12 years vs. 25% in those 12–17 years)

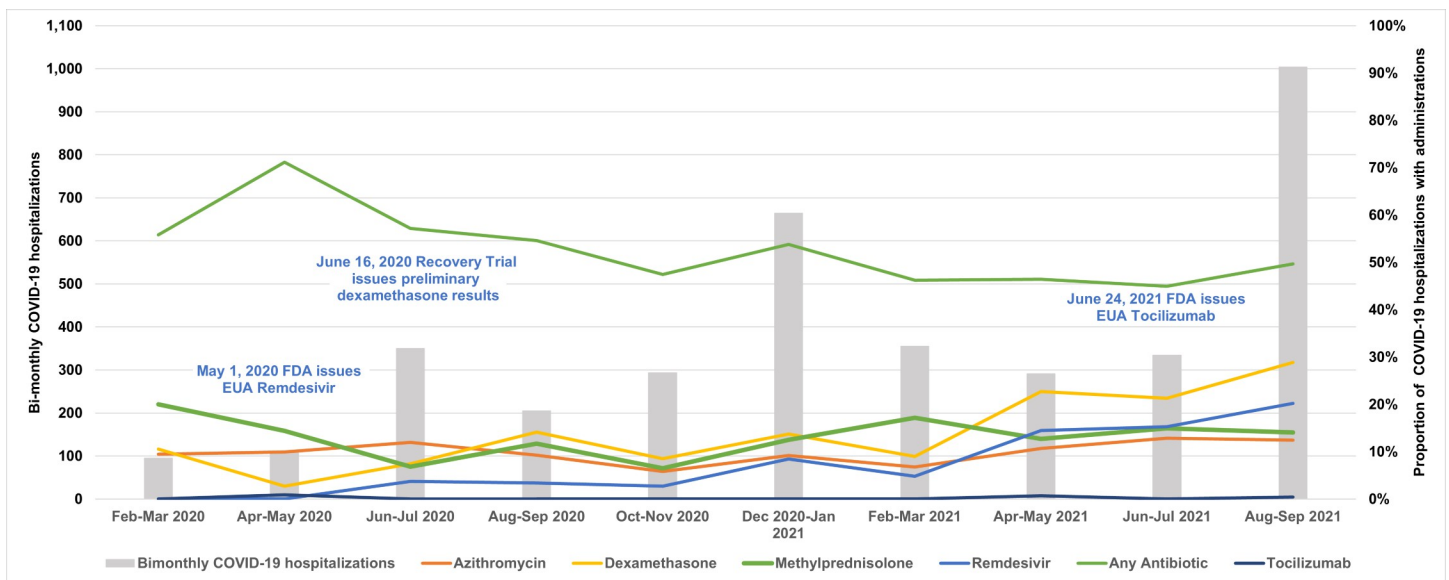

Fig 2. Proportion of pediatric COVID-19 hospitalizations with administration of select medications, by month, February 20, 2020-September 30, 2021.

<https://doi.org/10.1371/journal.pone.0288284.g002>



(Table 3). Inpatient medication administrations were more frequent in children admitted to the ICU.

Finally, we examined potential COVID-19 treatments under US FDA Emergency Use Authorization (EUA), including monoclonal antibodies and baricitinib and found just two administrations of monoclonal antibodies and seven administrations of baricitinib in hospitalized children with COVID-19 or MIS-C. Baricitinib administrations were first observed in the last week of August 2021.

## Discussion

In this descriptive analysis of children hospitalized in 126 hospitals through September 2021, we found relatively few children with a COVID-19 or MIS-C diagnosis. However, 41% of hospitalized children with COVID-19 and 70% with MIS-C were admitted to an ICU, 5% of those with COVID-19 and 9% with MIS-C were mechanically ventilated, and 38% of children with COVID-19 and 45% with MIS-C required supplemental oxygen or BiPAP. We identified few deaths (<1%) and most children were discharged home (93%). This analysis was conducted prior to eligibility of children <12 years for COVID-19 vaccination, and 60% of hospitalized children with COVID-19 diagnosis in this analysis were <12 years with the highest proportions of hospitalized children observed in the summer of 2021.

Our estimates of markers of illness severity were consistent with other studies [12, 15, 17, 29]. Children with COVID-19 diagnosis admitted to the ICU generally had more high-risk conditions (e.g., asthma), complications, and respiratory support recorded during their hospitalization than noted in the overall COVID-19 cohort. However, it is possible that some children were admitted to the ICU for reasons other than illness severity as ICU admission decisions are governed by physician discretion and hospital specific practices, particularly related to infection control considerations—i.e., a child may be admitted to the ICU for infection control and not due to severe illness. As we used coded data to identify ICU admissions, we were unable to distinguish specific reasons for ICU admission, but this could be done with detailed medical record review in future studies.

As expected, children with MIS-C diagnosis had evidence of severe illness and longer stays (median LOS 6 days); 69% were admitted to an ICU. As noted in other studies [12, 29–31], children with MIS-C generally had more high-risk conditions than the overall COVID-19 cohort (e.g., liver or renal disorders, cardiovascular disease). However, as conditions were defined with diagnoses during hospitalization, it is possible these included both acute complications and underlying conditions. While many children with COVID-19 or MIS-C had few pre-existing high-risk conditions, some children had asthma or obesity, both factors previously identified as associated with higher risk for prolonged recovery [12].

Viral pneumonia was uncommon among children with MIS-C, but we noted diagnoses such as sepsis (16%), myocarditis or pericarditis (14%). Notably, three quarters of children with MIS-C diagnosis were treated with methylprednisolone, 67% received immune globulin, half received anti-platelet therapy, and a third received low molecular weight heparin. Although understanding of MIS-C and treatments has evolved, observed treatments are consistent with previous reports as well as known complications of MIS-C including cardiac complications, sepsis, and coagulopathy [12, 30–33].

More than half of children with an MIS-C diagnosis did not have a COVID-19 diagnosis or positive test during their stay, this was expected based on the clinical course of disease and coding guidelines [34, 35]. This finding corresponds with recent study which used a data-driven approach to identify features which cluster patients into a group with high likelihood of having MIS-C and identified features such as being older (mean age 7 years) previously healthy and

**Table 3. Inpatient medication administrations among hospitalizations with COVID-19 diagnosis stratified by ICU stays and age category, February 20, 2020–September 30, 2021\*.**

|                                       | Hospitalizations with COVID-19 diagnosis (N = 2,186) | Hospitalizations with multisystem Inflammatory syndrome diagnosis (N = 395) | Hospitalizations with COVID-19 diagnosis AND ICU admission (N = 917) | Hospitalizations with COVID-19 diagnosis among patients less than 12 years of age (N = 1,306) | Hospitalizations with COVID-19 diagnosis among patients 12–17 years of age (N = 880) |
|---------------------------------------|------------------------------------------------------|-----------------------------------------------------------------------------|----------------------------------------------------------------------|-----------------------------------------------------------------------------------------------|--------------------------------------------------------------------------------------|
|                                       | %                                                    | %                                                                           | %                                                                    | %                                                                                             | %                                                                                    |
| <b>Potential COVID-19 treatments†</b> |                                                      |                                                                             |                                                                      |                                                                                               |                                                                                      |
| Remdesivir                            | 13.3%                                                | 4.8%                                                                        | 22.9%                                                                | 5.7%                                                                                          | 24.4%                                                                                |
| Tocilizumab                           | 0.4%                                                 | 0.8%                                                                        | 0.8%                                                                 | 0.1%                                                                                          | 0.8%                                                                                 |
| Sarilumab                             | 0.0%                                                 | 0.0%                                                                        | 0.0%                                                                 | 0.0%                                                                                          | 0.0%                                                                                 |
| Eculizumab                            | 0.0%                                                 | 0.0%                                                                        | 0.1%                                                                 | 0.0%                                                                                          | 0.1%                                                                                 |
| Methylprednisolone                    | 34.4%                                                | 75.1%                                                                       | 40.7%                                                                | 43.5%                                                                                         | 24.8%                                                                                |
| Lopinavir / Ritonavir                 | 0.0%                                                 | 0.0%                                                                        | 0.0%                                                                 | 0.0%                                                                                          | 0.0%                                                                                 |
| Norepinephrine                        | 1.1%                                                 | 8.4%                                                                        | 2.4%                                                                 | 0.8%                                                                                          | 1.7%                                                                                 |
| Dexamethasone                         | 24.6%                                                | 14.9%                                                                       | 33.0%                                                                | 16.9%                                                                                         | 36.0%                                                                                |
| Remdesivir and Dexamethasone§         | 11.3%                                                | 3.8%                                                                        | 19.4%                                                                | 3.9%                                                                                          | 22.2%                                                                                |
| Baricitinib                           | 0.3%                                                 | 0.3%                                                                        | 0.4%                                                                 | 0.0%                                                                                          | 0.8%                                                                                 |
| Baricitinib and Remdesivir            | 0.2%                                                 | 0.0%                                                                        | 0.3%                                                                 | 0.0%                                                                                          | 0.6%                                                                                 |
| Bamlanivimab                          | 0.0%                                                 | 0.3%                                                                        | 0.1%                                                                 | 0.0%                                                                                          | 0.1%                                                                                 |
| Casirivimab / Imdevimab               | 0.1%                                                 | 0.0%                                                                        | 0.1%                                                                 | 0.0%                                                                                          | 0.2%                                                                                 |
| Bamlanivimab and Etesevimab           | 0.0%                                                 | 0.0%                                                                        | 0.0%                                                                 | 0.0%                                                                                          | 0.0%                                                                                 |
| <b>Antibiotics†</b>                   |                                                      |                                                                             |                                                                      |                                                                                               |                                                                                      |
| Any Antibiotic use                    | 49.9%                                                | 68.1%                                                                       | 59.7%                                                                | 47.2%                                                                                         | 53.9%                                                                                |
| Azithromycin                          | 13.8%                                                | 12.9%                                                                       | 18.3%                                                                | 9.4%                                                                                          | 20.2%                                                                                |
| Doxycycline                           | 1.0%                                                 | 8.9%                                                                        | 1.5%                                                                 | 0.7%                                                                                          | 1.4%                                                                                 |
| <b>Antithrombotic medications†</b>    |                                                      |                                                                             |                                                                      |                                                                                               |                                                                                      |
| Low molecular weight heparin          | 17.3%                                                | 33.7%                                                                       | 31.2%                                                                | 5.8%                                                                                          | 34.4%                                                                                |
| Tissue plasminogen activator          | 2.0%                                                 | 5.8%                                                                        | 4.1%                                                                 | 2.2%                                                                                          | 1.6%                                                                                 |
| Vitamin K antagonists                 | 0.0%                                                 | 0.0%                                                                        | 0.1%                                                                 | 0.1%                                                                                          | 0.0%                                                                                 |
| Factor Xa inhibitors                  | 0.2%                                                 | 0.3%                                                                        | 0.4%                                                                 | 0.0%                                                                                          | 0.5%                                                                                 |
| Thrombin inhibitors                   | 2.2%                                                 | 6.1%                                                                        | 4.6%                                                                 | 2.3%                                                                                          | 1.9%                                                                                 |
| Anti-platelet therapy                 | 6.3%                                                 | 51.4%                                                                       | 10.8%                                                                | 6.9%                                                                                          | 5.5%                                                                                 |
| <b>Immune globulin (IVIg)</b>         |                                                      |                                                                             |                                                                      |                                                                                               |                                                                                      |
| Immune globulin (IVIg)                | 6.6%                                                 | 67.1%                                                                       | 11.8%                                                                | 7.5%                                                                                          | 5.2%                                                                                 |

\*Includes discharges for final billed patients only. The analysis does not include inpatient stays for patients still admitted or not completely coded by the data pull date.

†We defined administration of potential COVID-19 treatments and anti-thrombotic medications by National Drug Codes (NDC) and text string searches for generic and brand name.

<https://doi.org/10.1371/journal.pone.0288284.t003>

SARS-CoV-2 PCR negative, along with predominately cardiovascular and/or mucocutaneous involvement or high inflammatory biomarkers [30]. A limitation of our study is that tests for inflammatory markers and clinical tests examining cardiovascular or mucocutaneous involvement or function do not exist in dataset we used for this study, but these could be investigated in future studies. Although Feldstein previously reported on medications administered to children hospitalized with COVID-19 or MIS-C through late 2020 [17], we also examined inpatient utilization of antibiotics, and potential COVID-19 treatments such as monoclonal antibodies and baricitinib under EUA at through the end of the study period in late 2021. As expected, treatment patterns differed from those noted in adults [22]. For example, methylprednisolone was used more frequently than dexamethasone, especially in those with MIS-C diagnosis, and antibiotic use was common. In accordance with recent treatment guidelines [34, 35], we observed older children >12 years with COVID-19 were more frequently treated with remdesivir than younger children and those with MIS-C diagnosis were not frequently treated with remdesivir. As of March 2023, remdesivir is the only antiviral drug approved by the FDA for the treatment of COVID-19 in hospitalized children (28 days of age or older and weighing  $> = 3.0$  kg) [36]. Although in July 2021 the FDA reissued an EUA for baricitinib in children  $> = 2$  years hospitalized with COVID-19 requiring oxygen, ventilatory support or ECMO and removed a requirement to use baricitinib with remdesivir [37], we observed very low utilization in our analysis. However, as all baricitinib administrations we observed in children occurred after the EUA update in July 2021, it is possible low utilization could be explained by lack of immediate uptake between the EUA update and the end of our study period in September 2021, or insufficient evidence about benefits and risks in this population [34].

Our analyses characterizing inpatient medication administrations in hospitalized children with COVID-19 are generally consistent with recommendations for supportive care as the mainstay of therapy in children with severe COVID-19 [38–40], and thromboprophylaxis in some instances [41]. However, similar to at least one other US study [42], we observed a high proportion of COVID-19 patients with antibiotic administrations during their stay. In May 2022, NIH treatment guidelines were updated to recommend against empiric broad-spectrum antimicrobial therapy in hospitalized adults with COVID-19 [43]. We did not evaluate indications for antibiotic use, but future studies could investigate this as well as optimal use of antibiotics in hospitalized children with COVID-19.

A strength of this study is the size of the data source. We identified hospitalizations with COVID-19 or MIS-C diagnoses in an inpatient EHR database that includes 126 hospitals and captured over 300,000 pediatric hospitalizations during the COVID-19 pandemic through September 2021. Inpatient EHR data allow for capture and examination of detailed clinical information not routinely available in other electronic sources such as administrative claims. We restricted our analysis to only discharged patients with complete billing information to ensure data completeness [44].

There are several details to consider when interpreting our study results. Due to the nature of inpatient EHR data which captures hospital stay information, we were unable to examine patient characteristics, medication use, or care delivered before or after the hospitalization. We did not have access to the reason for admission, so some patients may have been admitted for other reasons unrelated to COVID-19. We used diagnosis and procedure codes to examine conditions and procedures during the hospitalization and used revenue codes to define ICU stays. We did not have access to SARS-CoV-2 laboratory results from outside the hospital system and used diagnosis codes to identify children with COVID-19 or MIS-C. However, others have shown positive predictive values over 90% for inpatient COVID-19 diagnosis [45, 46].

## Conclusions

Our study provides information on the natural history of COVID-19 and care received by hospitalized children with COVID-19 or MIS-C prior to the 2021 COVID-19 Omicron variant surge in the US. We have described potential COVID-19 therapies administered to children hospitalized with COVID-19 or MIS-C in 126 hospitals located in 18 US states, and report markers of illness severity among hospitalized children with COVID-19 that are consistent with previous studies. Over a third of hospitalized children with COVID-19 were treated with methylprednisolone, 25% with dexamethasone, and 13% were treated with remdesivir. Three quarters of hospitalized children with MIS-C were treated with methylprednisolone, 67% with immune globulin, 51% with antiplatelet therapy, and 33% with low molecular weight heparin. The trends we report on potential COVID-19 therapies administered to hospitalized children with COVID-19 may improve the understanding of real-world treatment patterns in this population and inform regulators and future studies designed to evaluate pediatric treatments for COVID-19.

## Supporting information

### S1 Appendix. Study design diagram.

(PDF)

### S2 Appendix. List of International Classification of Diseases, Ninth Revision, Clinical Modification (ICD-9-CM), International Classification of Diseases, Tenth Revision, Clinical Modification (ICD-10-CM), International Classification of Diseases, Ninth Revision, Procedure Coding System (ICD-9-PCS) International Classification of Diseases, Tenth Revision, Procedure Coding System (ICD-10-PCS), Current Procedural Terminology, Fourth Edition (CPT-4), and Healthcare Common Procedure Coding System, level II (HCPCS) codes used in the analysis.

(PDF)

### S3 Appendix. Generic and brand names of medical products used in this analysis.

(PDF)

## Acknowledgments

We would like to thank Brian Kit, Robert Jin, Neha Varma, Aileen Ochoa, Allison Froman, Julia Fearrington, Jennifer Noble, Ashish Rai, and Abinav Gowda for their contributions. Staff at Harvard Pilgrim Health Care Institute and HCA Healthcare had full access to the study data and were responsible for the collection, management, and integrity of the data and data analysis programs. The FDA participated in design of the analysis, interpretation of the results, and review and approval of the final manuscript.

**Disclaimer:** The views expressed in this publication represent those of the author(s) and do not necessarily represent the official views of HCA Healthcare or any of its affiliated entities. The views expressed in this report represent those of the authors and do not necessarily represent the official views of the U.S. FDA.

## Author Contributions

**Conceptualization:** Candace C. Fuller, Natasha Pratt, Patricia Bright, Richard Platt, Noelle M. Cocoros, Sarah K. Dutcher.

**Data curation:** Laura E. McLean, Russell E. Poland, Kenneth E. Sands.

**Formal analysis:** Austin Cosgrove, Edward Rosen.

**Investigation:** Candace C. Fuller, Austin Cosgrove, Mayura Shinde, Edward Rosen, Katie Haffenreffer, Christian Hague, Laura E. McLean, Jonathan Perlin, Russell E. Poland, Kenneth E. Sands, Richard Platt, Noelle M. Cocoros, Sarah K. Dutcher.

**Methodology:** Candace C. Fuller, Mayura Shinde, Edward Rosen, Noelle M. Cocoros.

**Project administration:** Katie Haffenreffer, Sarah K. Dutcher.

**Supervision:** Candace C. Fuller, Katie Haffenreffer, Russell E. Poland, Noelle M. Cocoros, Sarah K. Dutcher.

**Visualization:** Candace C. Fuller, Austin Cosgrove, Christian Hague.

**Writing – original draft:** Candace C. Fuller.

**Writing – review & editing:** Candace C. Fuller, Austin Cosgrove, Mayura Shinde, Edward Rosen, Katie Haffenreffer, Christian Hague, Laura E. McLean, Jonathan Perlin, Russell E. Poland, Kenneth E. Sands, Natasha Pratt, Patricia Bright, Richard Platt, Noelle M. Cocoros, Sarah K. Dutcher.

## References

1. Kim L. Hospitalization Rates and Characteristics of Children Aged 18 Years Hospitalized with Laboratory-Confirmed COVID-19—COVID-NET, 14 States, March 1–July 25, 2020. *MMWR Morb Mortal Wkly Rep* [Internet]. 2020 [cited 2021 Feb 4]; 69. Available from: <https://www.cdc.gov/mmwr/volumes/69/wr/mm6932e3.htm>
2. Delahoy MJ. Hospitalizations Associated with COVID-19 Among Children and Adolescents—COVID-NET, 14 States, March 1, 2020–August 14, 2021. *MMWR Morb Mortal Wkly Rep* [Internet]. 2021 [cited 2021 Sep 21];70. Available from: <https://www.cdc.gov/mmwr/volumes/70/wr/mm7036e2.htm>
3. Schuster JE, de St Maurice A. COVID-19 in Children—Not Just Little Adults. *JAMA Netw Open* [Internet]. 2021 Jun 10 [cited 2021 Sep 21]; Available from: <https://jamanetwork.com/journals/jamanetworkopen/fullarticle/2780708> PMID: 34097052
4. Iuliano AD. Trends in Disease Severity and Health Care Utilization During the Early Omicron Variant Period Compared with Previous SARS-CoV-2 High Transmission Periods—United States, December 2020–January 2022. *MMWR Morb Mortal Wkly Rep* [Internet]. 2022 [cited 2022 Jan 29];71. Available from: <https://www.cdc.gov/mmwr/volumes/71/wr/mm7104e4.htm>
5. U.S. Food and Drug Administration. FDA Takes Key Action in Fight Against COVID-19 By Issuing Emergency Use Authorization for First COVID-19 Vaccine [Internet]. 2020 [cited 2022 Jan 29]. Available from: <https://www.fda.gov/news-events/press-announcements/fda-takes-key-action-fight-against-covid-19-issuing-emergency-use-authorization-first-covid-19>
6. U.S. Food and Drug Administration. Coronavirus (COVID-19) Update: FDA Authorizes Pfizer-BioNTech COVID-19 Vaccine for Emergency Use in Adolescents in Another Important Action in Fight Against Pandemic [Internet]. 2021 [cited 2022 Jan 29]. Available from: <https://www.fda.gov/news-events/press-announcements/coronavirus-covid-19-update-fda-authorizes-pfizer-biontech-covid-19-vaccine-emergency-use>
7. U.S. Food and Drug Administration. FDA Authorizes Pfizer-BioNTech COVID-19 Vaccine for Emergency Use in Children 5 through 11 Years of Age [Internet]. 2021 [cited 2022 Jan 29]. Available from: <https://www.fda.gov/news-events/press-announcements/fda-authorizes-pfizer-biontech-covid-19-vaccine-emergency-use-children-5-through-11-years-age>
8. U.S. Food and Drug Administration. Coronavirus (COVID-19) Update: FDA Authorizes Moderna and Pfizer-BioNTech COVID-19 Vaccines for Children Down to 6 Months of Age [Internet]. 2022 [cited 2022 Jun 29]. Available from: <https://www.fda.gov/news-events/press-announcements/coronavirus-covid-19-update-fda-authorizes-moderna-and-pfizer-biontech-covid-19-vaccines-children>
9. Dufort EM, Koumans EH, Chow EJ, Rosenthal EM, Muse A, Rowlands J, et al. Multisystem Inflammatory Syndrome in Children in New York State. *N Engl J Med*. 2020 Jul 23; 383(4):347–58. <https://doi.org/10.1056/NEJMoa2021756> PMID: 32598830
10. Chao JY, Derespina KR, Herold BC, Goldman DL, Aldrich M, Weingarten J, et al. Clinical Characteristics and Outcomes of Hospitalized and Critically Ill Children and Adolescents with Coronavirus Disease 2019 at a Tertiary Care Medical Center in New York City. *J Pediatr*. 2020 Aug; 223:14–19.e2. <https://doi.org/10.1016/j.jpeds.2020.05.006> PMID: 32407719

11. Kompaniyets L, Agathis NT, Nelson JM, Preston LE, Ko JY, Belay B, et al. Underlying Medical Conditions Associated With Severe COVID-19 Illness Among Children. *JAMA Netw Open*. 2021 Jun 10; 4(6): e2111182. <https://doi.org/10.1001/jamanetworkopen.2021.11182> PMID: 34097050
12. Maddux AB, Berbert L, Young CC, Feldstein LR, Zambrano LD, Kucukak S, et al. Health Impairments in Children and Adolescents After Hospitalization for Acute COVID-19 or MIS-C. *Pediatrics*. 2022 Sep 1; 150(3):e2022057798. <https://doi.org/10.1542/peds.2022-057798> PMID: 35765138
13. Fernandes D. Severe Acute Respiratory Syndrome Coronavirus 2 Clinical Syndromes and Predictors of Disease Severity in Hospitalized Children and Youth. *Journal of Pediatrics*. 230(E10):P23–31.
14. Zachariah P, Johnson CL, Halabi KC, Ahn D, Sen AI, Fischer A, et al. Epidemiology, Clinical Features, and Disease Severity in Patients With Coronavirus Disease 2019 (COVID-19) in a Children's Hospital in New York City, New York. *JAMA Pediatr*. 2020 Oct 5; 174(10):e202430. <https://doi.org/10.1001/jamapediatrics.2020.2430> PMID: 32492092
15. Woodruff RC, Campbell AP, Taylor CA, Chai SJ, Kawasaki B, Meek J, et al. Risk Factors for Severe COVID-19 in Children. *Pediatrics* [Internet]. 2021 Oct 1 [cited 2021 Nov 2]; Available from: <https://pediatrics.aappublications.org/content/early/2021/10/21/peds.2021-053418> PMID: 34935038
16. Siegel DA. Trends in COVID-19 Cases, Emergency Department Visits, and Hospital Admissions Among Children and Adolescents Aged 0–17 Years—United States, August 2020–August 2021. *MMWR Morb Mortal Wkly Rep* [Internet]. 2021 [cited 2021 Sep 21];70. Available from: <https://www.cdc.gov/mmwr/volumes/70/wr/mm7036e1.htm> PMID: 34499628
17. Feldstein LR, Tenforde MW, Friedman KG, Newhams M, Rose EB, Dapul H, et al. Characteristics and Outcomes of US Children and Adolescents With Multisystem Inflammatory Syndrome in Children (MIS-C) Compared With Severe Acute COVID-19. *JAMA*. 2021 Mar 16; 325(11):1074–87. <https://doi.org/10.1001/jama.2021.2091> PMID: 33625505
18. National Institutes of Health. Therapeutic Management of Hospitalized Children With COVID-19 [Internet]. COVID-19 Treatment Guidelines. Available from: <https://www.covid19treatmentguidelines.nih.gov/management/clinical-management-of-children/hospitalized-children-therapeutic-management/>
19. Platt R, Brown JS, Robb M, McClellan M, Ball R, Nguyen MD, et al. The FDA Sentinel Initiative—An Evolving National Resource. *N Engl J Med*. 2018 Nov 29; 379(22):2091–3. <https://doi.org/10.1056/NEJMp1809643> PMID: 30485777
20. Ball R, Robb M, Anderson SA, Dal Pan G. The FDA's sentinel initiative—A comprehensive approach to medical product surveillance. *Clin Pharmacol Ther*. 2016 Mar; 99(3):265–8. <https://doi.org/10.1002/cpt.320> PMID: 26667601
21. Fuller CC, Cosgrove A, Sands K, Miller KM, Poland RE, Rosen E, et al. Using inpatient electronic medical records to study influenza for pandemic preparedness. *Influenza Other Respir Viruses*. 2022 Mar; 16(2):265–275. <https://doi.org/10.1111/irv.12921> Epub 2021 Oct 25. PMID: 34697904.
22. Cocoros NM, Fuller CC, Adimadhyam S, Ball R, Brown JS, Dal Pan G, et al. A COVID-19-ready public health surveillance system: The FDA's Sentinel System. *Pharmacoepidemiol Drug Saf*. 2021 Jul; 30(7):827–837. <https://doi.org/10.1002/pds.5240> Epub 2021 Apr 18. PMID: 33797815.
23. HCA Healthcare. Who We Are [Internet]. [cited 2020 Sep 7]. Available from: <https://hcahealthcare.com/about/>
24. Centers for Disease Control and Prevention. ICD-10-CM Official Coding Guidelines—Supplement Coding encounters related to COVID-19 Coronavirus Outbreak [Internet]. [cited 2020 Nov 9]. Available from: <https://www.cdc.gov/nchs/data/icd/ICD-10-CM-Official-Coding-Guidance-Interim-Advice-coronavirus-feb-20-2020.pdf>
25. Centers for Disease Control and Prevention. COVID-19 and Your Health [Internet]. Centers for Disease Control and Prevention. 2020 [cited 2022 Jan 7]. Available from: <https://www.cdc.gov/coronavirus/2019-ncov/need-extra-precautions/people-with-medical-conditions.html>
26. Basic HHS Policy for Protection of Human Research Subjects [Internet]. 45 CFR §46.102(l)(2). Available from: <https://www.hhs.gov/ohrp/regulations-and-policy/regulations/45-cfr-46/index.html>
27. Rosati K, Jorgensen N, Sloiz M, Evans BJ. HIPAA and Common Rule Compliance in the Sentinel Initiative. 2018; 49. Available from: <https://www.sentinelinitiative.org/sites/default/files/communications/publications-presentations/HIPAA-Common-Rule-Compliance-in-Sentinel-Initiative.pdf>
28. Federal Policy for the Protection of Human Subjects, 82 Federal Register. Jan 19, 2017 p. 7149, 7172, 7175–76.
29. Miller AD, Zambrano LD, Yousaf AR, Abrams JY, Meng L, Wu MJ, et al. Multisystem Inflammatory Syndrome in Children—United States, February 2020–July 2021. *Clin Infect Dis Off Publ Infect Dis Soc Am*. 2022 Aug 24; 75(1):e1165–75.
30. Geva A, Patel MM, Newhams MM, Young CC, Son MBF, Kong M, et al. Data-driven clustering identifies features distinguishing multisystem inflammatory syndrome from acute COVID-19 in children and

- adolescents. *eClinicalMedicine* [Internet]. 2021 Oct 1 [cited 2023 Mar 29];40. Available from: <https://doi.org/10.1016/j.eclinm.2021.101112> PMID: 34485878
31. Son MBF, Murray N, Friedman K, Young CC, Newhams MM, Feldstein LR, et al. Multisystem Inflammatory Syndrome in Children—Initial Therapy and Outcomes. *N Engl J Med*. 2021 Jul 1; 385(1):23–34. <https://doi.org/10.1056/NEJMoa2102605> PMID: 34133855
  32. Belhadjer Z, Méot M, Bajolle F, Khraiche D, Legendre A, Abakka S, et al. Acute Heart Failure in Multisystem Inflammatory Syndrome in Children in the Context of Global SARS-CoV-2 Pandemic. *Circulation*. 2020 Aug 4; 142(5):429–36. <https://doi.org/10.1161/CIRCULATIONAHA.120.048360> PMID: 32418446
  33. Abrams JY, Belay ED, Godfred-Cato S, Campbell AP, Zambrano LD, Kunkel A, et al. Trends in Treatments for Multisystem Inflammatory Syndrome in Children (MIS-C), United States, February 2020—July 2021. *Clin Infect Dis Off Publ Infect Dis Soc Am*. 2022 Sep 30; 75(7):1201–9.
  34. National Institutes of Health. Special Considerations in Children [Internet]. COVID-19 Treatment Guidelines. [cited 2022 Mar 9]. Available from: <https://www.covid19treatmentguidelines.nih.gov/special-populations/children/>
  35. National Institutes of Health. Hospitalized Pediatric Patients: Therapeutic Management of MIS-C [Internet]. COVID-19 Treatment Guidelines. [cited 2022 Apr 4]. Available from: <https://www.covid19treatmentguidelines.nih.gov/management/clinical-management/hospitalized-pediatric-patients—therapeutic-management-of-mis-c/>
  36. U.S. Food and Drug Administration. FDA Approves First Treatment for COVID-19 [Internet]. [cited 2021 Feb 4]. Available from: <https://www.fda.gov/news-events/press-announcements/fda-approves-first-treatment-covid-19>
  37. U.S. Food and Drug Administration. Fact sheet for healthcare providers: emergency use authorization (EUA) of baricitinib [Internet]. [cited 2021 Nov 8]. Available from: <https://www.fda.gov/media/143823/download>
  38. Larson DT, Sherner JH, Gallagher KM, Judy CL, Paul MB, Mahoney AM, et al. Clinical Outcomes of COVID-19 with Evidence-Based Supportive Care. *Clin Infect Dis*. 2020 May 30; 74(1):133–135
  39. Infectious Diseases Society of America. Guidelines on the Treatment and Management of Patients with COVID-19 [Internet]. [cited 2021 Feb 4]. Available from: <https://www.idsociety.org/practice-guideline/covid-19-guideline-treatment-and-management/>
  40. National Institute for Health and Care Excellence. COVID-19 rapid guideline: children and young people who are immunocompromised [Internet]. London: National Institute for Health and Care Excellence (UK); 2020 [cited 2021 Feb 4]. (National Institute for Health and Care Excellence: Clinical Guidelines). Available from: <http://www.ncbi.nlm.nih.gov/books/NBK566164/>
  41. Goldenberg NA, Sochet A, Albisetti M, Biss T, Bonduel M, Jaffray J, et al. Consensus-based clinical recommendations and research priorities for anticoagulant thromboprophylaxis in children hospitalized for COVID-19–related illness. *J Thromb Haemost*. 2020; 18(11):3099–105. <https://doi.org/10.1111/jth.15073> PMID: 33174388
  42. Rose AN, Baggs J, Wolford H, Neuhauser MM, Srinivasan A, Gundlapalli AV, et al. Trends in Antibiotic Use in United States Hospitals During the Coronavirus Disease 2019 Pandemic. *Open Forum Infect Dis*. 2021 Jun 1; 8(6):ofab236. <https://doi.org/10.1093/ofid/ofab236> PMID: 34226869
  43. National Institutes of Health. Coronavirus Disease 2019 (COVID-19) Treatment Guidelines [Internet]. 2021. Available from: <https://www.covid19treatmentguidelines.nih.gov/>
  44. Pottgård A, Kurz X, Moore N, Christiansen CF, Klungel O. Considerations for pharmacoepidemiological analyses in the SARS-CoV-2 pandemic. *Pharmacoepidemiol Drug Saf*. 2020; 29(8):825–31. <https://doi.org/10.1002/pds.5029> PMID: 32369865
  45. Lynch KE, Viernes B, Gatsby E, DuVall SL, Jones BE, Box TL, et al. Positive Predictive Value of COVID-19 ICD-10 Diagnosis Codes Across Calendar Time and Clinical Setting. *Clin Epidemiol*. 2021 Oct 27; 13:1011–8. <https://doi.org/10.2147/CLEP.S335621> PMID: 34737645
  46. Kluberg SA, Hou L, Dutcher SK, Billings M, Kit B, Toh S, et al. Validation of diagnosis codes to identify hospitalized COVID-19 patients in health care claims data. *Pharmacoepidemiol Drug Saf*. 2022; 31(4):476–80. <https://doi.org/10.1002/pds.5401> PMID: 34913208
