# Supplementary material for: Treatment and care received by children hospitalized with COVID-19 in a large hospital network in the United States, February 2020 to September 2021
Source: PubMed Central journal article supplement (PMC10335660; doi:10.1371/journal.pone.0288284), 2023-07-11

# S1 Appendix. Study Design Diagram

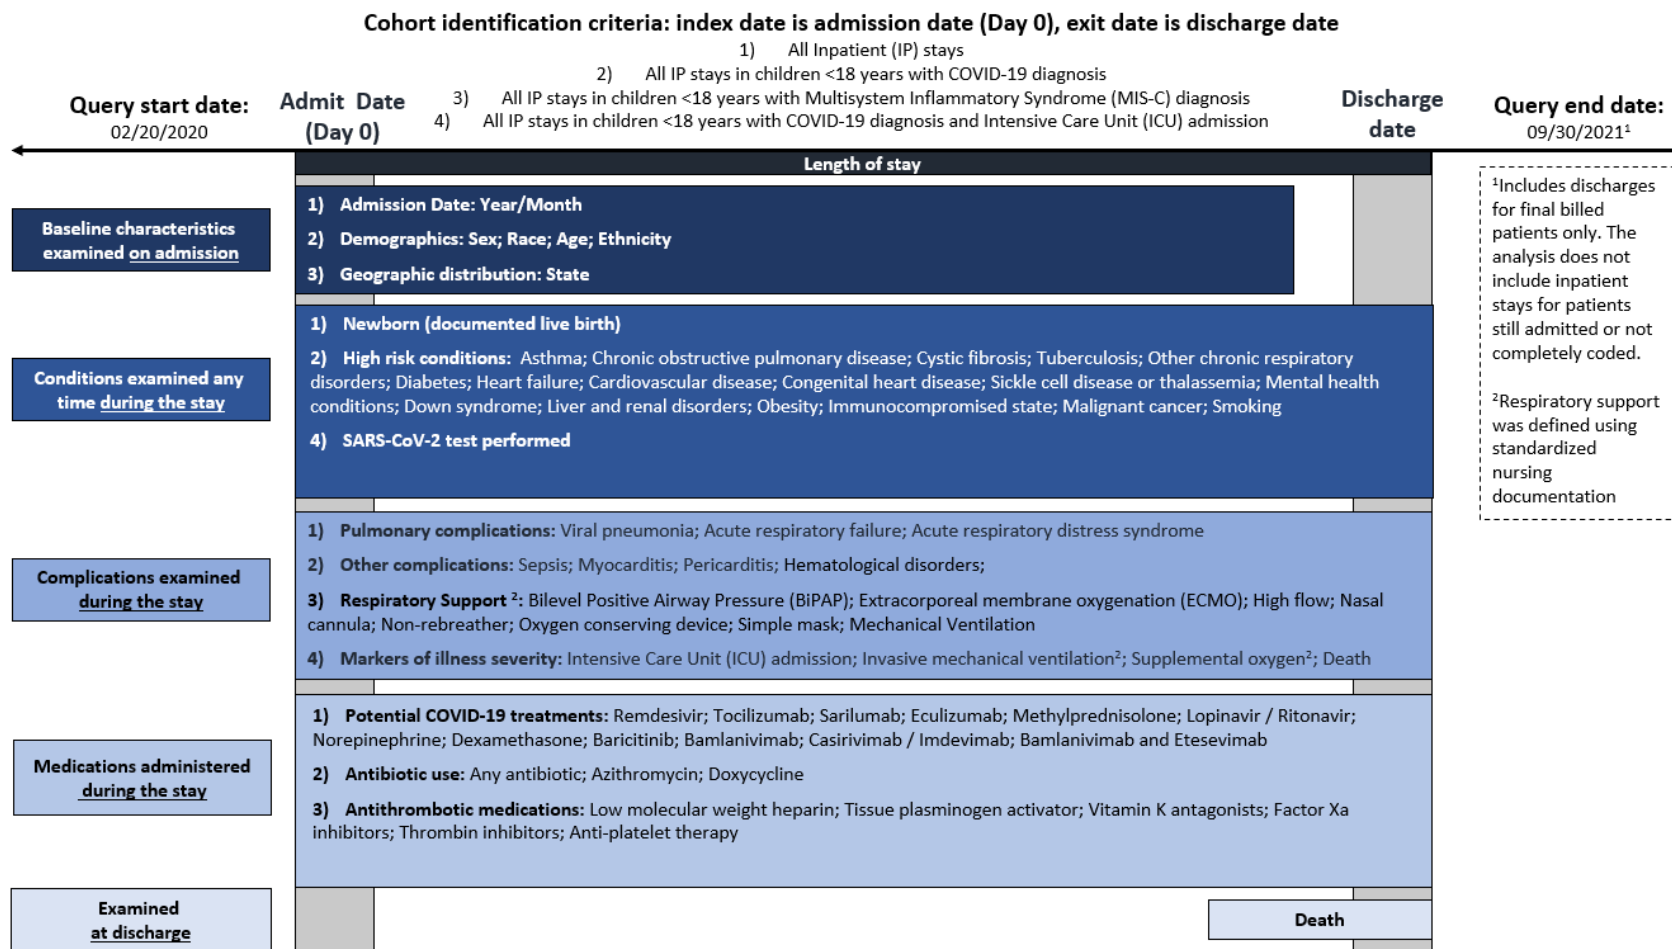

Supplement: pone.0288284.s001.pdf [file pone.0288284.s001.pdf]
