# Supplementary material for: Treatment and care received by children hospitalized with COVID-19 in a large hospital network in the United States, February 2020 to September 2021
Source: PubMed Central journal article supplement (PMC10335660; doi:10.1371/journal.pone.0288284), 2023-07-11
Supplement: pone.0288284.s002.pdf [file pone.0288284.s002.pdf]

S2 Appendix. List of International Classification of Diseases, Ninth Revision, Clinical Modification (ICD-9-CM), International Classification of Diseases, Tenth Revision, Clinical Modification (ICD-10-CM), International Classification of Diseases, Ninth Revision, Procedure Coding System (ICD-9-PCS) International Classification of Diseases, Tenth Revision, Procedure Coding System (ICD-10-PCS), Current Procedural Terminology, Fourth Edition (CPT-4), and Healthcare Common Procedure Coding System, Level II (HCPCS) Codes Used in the Analysis

| Code          | Description                                           | Code      |           |
|---------------|-------------------------------------------------------|-----------|-----------|
|               |                                                       | Category  | Code Type |
| <b>Asthma</b> |                                                       |           |           |
| 493           | Asthma                                                | Diagnosis | ICD-9-CM  |
| 493.0         | Extrinsic asthma                                      | Diagnosis | ICD-9-CM  |
| 493.00        | Extrinsic asthma, unspecified                         | Diagnosis | ICD-9-CM  |
| 493.01        | Extrinsic asthma with status asthmaticus              | Diagnosis | ICD-9-CM  |
| 493.02        | Extrinsic asthma, with (acute) exacerbation           | Diagnosis | ICD-9-CM  |
| 493.1         | Intrinsic asthma                                      | Diagnosis | ICD-9-CM  |
| 493.10        | Intrinsic asthma, unspecified                         | Diagnosis | ICD-9-CM  |
| 493.11        | Intrinsic asthma with status asthmaticus              | Diagnosis | ICD-9-CM  |
| 493.12        | Intrinsic asthma, with (acute) exacerbation           | Diagnosis | ICD-9-CM  |
| 493.2         | Chronic obstructive asthma                            | Diagnosis | ICD-9-CM  |
| 493.20        | Chronic obstructive asthma, unspecified               | Diagnosis | ICD-9-CM  |
| 493.21        | Chronic obstructive asthma with status asthmaticus    | Diagnosis | ICD-9-CM  |
| 493.22        | Chronic obstructive asthma, with (acute) exacerbation | Diagnosis | ICD-9-CM  |
| 493.8         | Other forms of asthma                                 | Diagnosis | ICD-9-CM  |
| 493.81        | Exercise induced bronchospasm                         | Diagnosis | ICD-9-CM  |
| 493.82        | Cough variant asthma                                  | Diagnosis | ICD-9-CM  |
| 493.9         | Unspecified asthma                                    | Diagnosis | ICD-9-CM  |
| 493.90        | Asthma, unspecified, unspecified status               | Diagnosis | ICD-9-CM  |
| 493.91        | Asthma, unspecified with status asthmaticus           | Diagnosis | ICD-9-CM  |
| 493.92        | Asthma, unspecified, with (acute) exacerbation        | Diagnosis | ICD-9-CM  |
| J45.20        | Mild intermittent asthma, uncomplicated               | Diagnosis | ICD-10-CM |
| J45.21        | Mild intermittent asthma with (acute) exacerbation    | Diagnosis | ICD-10-CM |
| J45.22        | Mild intermittent asthma with status asthmaticus      | Diagnosis | ICD-10-CM |
| J45.30        | Mild persistent asthma, uncomplicated                 | Diagnosis | ICD-10-CM |
| J45.31        | Mild persistent asthma with (acute) exacerbation      | Diagnosis | ICD-10-CM |
| J45.32        | Mild persistent asthma with status asthmaticus        | Diagnosis | ICD-10-CM |
| J45.40        | Moderate persistent asthma, uncomplicated             | Diagnosis | ICD-10-CM |
| J45.41        | Moderate persistent asthma with (acute) exacerbation  | Diagnosis | ICD-10-CM |
| J45.42        | Moderate persistent asthma with status asthmaticus    | Diagnosis | ICD-10-CM |
| J45.50        | Severe persistent asthma, uncomplicated               | Diagnosis | ICD-10-CM |
| J45.51        | Severe persistent asthma with (acute) exacerbation    | Diagnosis | ICD-10-CM |
| J45.52        | Severe persistent asthma with status asthmaticus      | Diagnosis | ICD-10-CM |
| J45.901       | Unspecified asthma with (acute) exacerbation          | Diagnosis | ICD-10-CM |
| J45.902       | Unspecified asthma with status asthmaticus            | Diagnosis | ICD-10-CM |
| J45.909       | Unspecified asthma, uncomplicated                     | Diagnosis | ICD-10-CM |
| J45.990       | Exercise induced bronchospasm                         | Diagnosis | ICD-10-CM |
| J45.991       | Cough variant asthma                                  | Diagnosis | ICD-10-CM |

| <b>Code</b>                                  | <b>Description</b>                                                           | <b>Code</b> | <b>Code Type</b> |
|----------------------------------------------|------------------------------------------------------------------------------|-------------|------------------|
| <b>Category</b>                              |                                                                              |             |                  |
| J45.998                                      | Other asthma                                                                 | Diagnosis   | ICD-10-CM        |
| <b>Chronic Obstructive Pulmonary Disease</b> |                                                                              |             |                  |
| 490                                          | Bronchitis, not specified as acute or chronic                                | Diagnosis   | ICD-9-CM         |
| 491                                          | Chronic bronchitis                                                           | Diagnosis   | ICD-9-CM         |
| 491.0                                        | Simple chronic bronchitis                                                    | Diagnosis   | ICD-9-CM         |
| 491.1                                        | Mucopurulent chronic bronchitis                                              | Diagnosis   | ICD-9-CM         |
| 491.2                                        | Obstructive chronic bronchitis                                               | Diagnosis   | ICD-9-CM         |
| 491.20                                       | Obstructive chronic bronchitis, without exacerbation                         | Diagnosis   | ICD-9-CM         |
| 491.21                                       | Obstructive chronic bronchitis, with (acute) exacerbation                    | Diagnosis   | ICD-9-CM         |
| 491.22                                       | Obstructive chronic bronchitis with acute bronchitis                         | Diagnosis   | ICD-9-CM         |
| 491.8                                        | Other chronic bronchitis                                                     | Diagnosis   | ICD-9-CM         |
| 491.9                                        | Unspecified chronic bronchitis                                               | Diagnosis   | ICD-9-CM         |
| 492                                          | Emphysema                                                                    | Diagnosis   | ICD-9-CM         |
| 492.0                                        | Emphysematous bleb                                                           | Diagnosis   | ICD-9-CM         |
| 492.8                                        | Other emphysema                                                              | Diagnosis   | ICD-9-CM         |
| 494                                          | Bronchiectasis                                                               | Diagnosis   | ICD-9-CM         |
| 494.0                                        | Bronchiectasis without acute exacerbation                                    | Diagnosis   | ICD-9-CM         |
| 494.1                                        | Bronchiectasis with acute exacerbation                                       | Diagnosis   | ICD-9-CM         |
| 495                                          | Extrinsic allergic alveolitis                                                | Diagnosis   | ICD-9-CM         |
| 495.0                                        | Farmers' lung                                                                | Diagnosis   | ICD-9-CM         |
| 495.1                                        | Bagassosis                                                                   | Diagnosis   | ICD-9-CM         |
| 495.2                                        | Bird-fanciers' lung                                                          | Diagnosis   | ICD-9-CM         |
| 495.3                                        | Suberosis                                                                    | Diagnosis   | ICD-9-CM         |
| 495.4                                        | Malt workers' lung                                                           | Diagnosis   | ICD-9-CM         |
| 495.5                                        | Mushroom workers' lung                                                       | Diagnosis   | ICD-9-CM         |
| 495.6                                        | Maple bark-strippers' lung                                                   | Diagnosis   | ICD-9-CM         |
| 495.7                                        | Ventilation pneumonitis                                                      | Diagnosis   | ICD-9-CM         |
| 495.8                                        | Other specified allergic alveolitis and pneumonitis                          | Diagnosis   | ICD-9-CM         |
| 495.9                                        | Unspecified allergic alveolitis and pneumonitis                              | Diagnosis   | ICD-9-CM         |
| 496                                          | Chronic airway obstruction, not elsewhere classified                         | Diagnosis   | ICD-9-CM         |
| J40                                          | Bronchitis, not specified as acute or chronic                                | Diagnosis   | ICD-10-CM        |
| J41.0                                        | Simple chronic bronchitis                                                    | Diagnosis   | ICD-10-CM        |
| J41.1                                        | Mucopurulent chronic bronchitis                                              | Diagnosis   | ICD-10-CM        |
| J41.8                                        | Mixed simple and mucopurulent chronic bronchitis                             | Diagnosis   | ICD-10-CM        |
| J42                                          | Unspecified chronic bronchitis                                               | Diagnosis   | ICD-10-CM        |
| J43.0                                        | Unilateral pulmonary emphysema [MacLeod's syndrome]                          | Diagnosis   | ICD-10-CM        |
| J43.1                                        | Panlobular emphysema                                                         | Diagnosis   | ICD-10-CM        |
| J43.2                                        | Centrilobular emphysema                                                      | Diagnosis   | ICD-10-CM        |
| J43.8                                        | Other emphysema                                                              | Diagnosis   | ICD-10-CM        |
| J43.9                                        | Emphysema, unspecified                                                       | Diagnosis   | ICD-10-CM        |
| J44.0                                        | Chronic obstructive pulmonary disease with acute lower respiratory infection | Diagnosis   | ICD-10-CM        |
| J44.1                                        | Chronic obstructive pulmonary disease with (acute) exacerbation              | Diagnosis   | ICD-10-CM        |
| J44.9                                        | Chronic obstructive pulmonary disease, unspecified                           | Diagnosis   | ICD-10-CM        |
| J47.0                                        | Bronchiectasis with acute lower respiratory infection                        | Diagnosis   | ICD-10-CM        |
| J47.1                                        | Bronchiectasis with (acute) exacerbation                                     | Diagnosis   | ICD-10-CM        |

| <b>Code</b>            | <b>Description</b>                                                                                                                       | <b>Code Category</b> | <b>Code Type</b> |
|------------------------|------------------------------------------------------------------------------------------------------------------------------------------|----------------------|------------------|
| J47.9                  | Bronchiectasis, uncomplicated                                                                                                            | Diagnosis            | ICD-10-CM        |
| J67.0                  | Farmer's lung                                                                                                                            | Diagnosis            | ICD-10-CM        |
| J67.1                  | Bagassosis                                                                                                                               | Diagnosis            | ICD-10-CM        |
| J67.2                  | Bird fancier's lung                                                                                                                      | Diagnosis            | ICD-10-CM        |
| J67.3                  | Suberosis                                                                                                                                | Diagnosis            | ICD-10-CM        |
| J67.4                  | Maltworker's lung                                                                                                                        | Diagnosis            | ICD-10-CM        |
| J67.5                  | Mushroom-worker's lung                                                                                                                   | Diagnosis            | ICD-10-CM        |
| J67.6                  | Maple-bark-stripper's lung                                                                                                               | Diagnosis            | ICD-10-CM        |
| J67.7                  | Air conditioner and humidifier lung                                                                                                      | Diagnosis            | ICD-10-CM        |
| J67.8                  | Hypersensitivity pneumonitis due to other organic dusts                                                                                  | Diagnosis            | ICD-10-CM        |
| J67.9                  | Hypersensitivity pneumonitis due to unspecified organic dust                                                                             | Diagnosis            | ICD-10-CM        |
| <b>Cystic Fibrosis</b> |                                                                                                                                          |                      |                  |
| E84                    | Cystic fibrosis                                                                                                                          | Diagnosis            | ICD-10-CM        |
| E84.0                  | Cystic fibrosis with pulmonary manifestations                                                                                            | Diagnosis            | ICD-10-CM        |
| E84.1                  | Cystic fibrosis with intestinal manifestations                                                                                           | Diagnosis            | ICD-10-CM        |
| E84.11                 | Meconium ileus in cystic fibrosis                                                                                                        | Diagnosis            | ICD-10-CM        |
| E84.19                 | Cystic fibrosis with other intestinal manifestations                                                                                     | Diagnosis            | ICD-10-CM        |
| E84.8                  | Cystic fibrosis with other manifestations                                                                                                | Diagnosis            | ICD-10-CM        |
| E84.9                  | Cystic fibrosis, unspecified                                                                                                             | Diagnosis            | ICD-10-CM        |
| Z14.1                  | Cystic fibrosis carrier                                                                                                                  | Diagnosis            | ICD-10-CM        |
| <b>Tuberculosis</b>    |                                                                                                                                          |                      |                  |
| 010.90                 | Primary tuberculous infection, unspecified, confirmation unspecified                                                                     | Diagnosis            | ICD-9-CM         |
| 011                    | Pulmonary tuberculosis                                                                                                                   | Diagnosis            | ICD-9-CM         |
| 011.0                  | Tuberculosis of lung, infiltrative                                                                                                       | Diagnosis            | ICD-9-CM         |
| 011.00                 | Tuberculosis of lung, infiltrative, confirmation unspecified                                                                             | Diagnosis            | ICD-9-CM         |
| 011.01                 | Tuberculosis of lung, infiltrative, bacteriological or histological examination not done                                                 | Diagnosis            | ICD-9-CM         |
| 011.02                 | Tuberculosis of lung, infiltrative, bacteriological or histological examination unknown (at present)                                     | Diagnosis            | ICD-9-CM         |
| 011.03                 | Tuberculosis of lung, infiltrative, tubercle bacilli found (in sputum) by microscopy                                                     | Diagnosis            | ICD-9-CM         |
| 011.04                 | Tuberculosis of lung, infiltrative, tubercle bacilli not found (in sputum) by microscopy, but found by bacterial culture                 | Diagnosis            | ICD-9-CM         |
| 011.05                 | Tuberculosis of lung, infiltrative, tubercle bacilli not found by bacteriological examination, but tuberculosis confirmed histologically | Diagnosis            | ICD-9-CM         |
| 011.06                 | Tuberculosis of lung, infiltrative, tubercle bacilli not found bacteriological or                                                        | Diagnosis            | ICD-9-CM         |
| 011.1                  | Tuberculosis of lung, nodular                                                                                                            | Diagnosis            | ICD-9-CM         |
| 011.10                 | Tuberculosis of lung, nodular, confirmation unspecified                                                                                  | Diagnosis            | ICD-9-CM         |
| 011.11                 | Tuberculosis of lung, nodular, bacteriological or histological examination not done                                                      | Diagnosis            | ICD-9-CM         |
| 011.12                 | Tuberculosis of lung, nodular, bacteriological or histological examination unknown (at present)                                          | Diagnosis            | ICD-9-CM         |
| 011.13                 | Tuberculosis of lung, nodular, tubercle bacilli found (in sputum) by microscopy                                                          | Diagnosis            | ICD-9-CM         |
| 011.14                 | Tuberculosis of lung, nodular, tubercle bacilli not found (in sputum) by microscopy,                                                     | Diagnosis            | ICD-9-CM         |
| 011.15                 | Tuberculosis of lung, nodular, tubercle bacilli not found by bacteriological examination, but tuberculosis confirmed histologically      | Diagnosis            | ICD-9-CM         |

| Code   | Description                                                                                                                                                                           | Code      |           |
|--------|---------------------------------------------------------------------------------------------------------------------------------------------------------------------------------------|-----------|-----------|
|        |                                                                                                                                                                                       | Category  | Code Type |
| 011.16 | Tuberculosis of lung, nodular, tubercle bacilli not found by bacteriological or histological examination, but tuberculosis confirmed by other methods [inoculation of animals]        | Diagnosis | ICD-9-CM  |
| 011.2  | Tuberculosis of lung with cavitation                                                                                                                                                  | Diagnosis | ICD-9-CM  |
| 011.20 | Tuberculosis of lung with cavitation, confirmation unspecified                                                                                                                        | Diagnosis | ICD-9-CM  |
| 011.21 | Tuberculosis of lung with cavitation, bacteriological or histological examination not done                                                                                            | Diagnosis | ICD-9-CM  |
| 011.22 | Tuberculosis of lung with cavitation, bacteriological or histological examination unknown (at present)                                                                                | Diagnosis | ICD-9-CM  |
| 011.23 | Tuberculosis of lung with cavitation, tubercle bacilli found (in sputum) by microscopy                                                                                                | Diagnosis | ICD-9-CM  |
| 011.24 | Tuberculosis of lung with cavitation, tubercle bacilli not found (in sputum) by microscopy, but found by bacterial culture                                                            | Diagnosis | ICD-9-CM  |
| 011.25 | Tuberculosis of lung with cavitation, tubercle bacilli not found by bacteriological examination, but tuberculosis confirmed histologically                                            | Diagnosis | ICD-9-CM  |
| 011.26 | Tuberculosis of lung with cavitation, tubercle bacilli not found by bacteriological or histological examination, but tuberculosis confirmed by other methods [inoculation of animals] | Diagnosis | ICD-9-CM  |
| 011.3  | Tuberculosis of bronchus                                                                                                                                                              | Diagnosis | ICD-9-CM  |
| 011.30 | Tuberculosis of bronchus, confirmation unspecified                                                                                                                                    | Diagnosis | ICD-9-CM  |
| 011.31 | Tuberculosis of bronchus, bacteriological or histological examination not done                                                                                                        | Diagnosis | ICD-9-CM  |
| 011.32 | Tuberculosis of bronchus, bacteriological or histological examination unknown (at present)                                                                                            | Diagnosis | ICD-9-CM  |
| 011.33 | Tuberculosis of bronchus, tubercle bacilli found (in sputum) by microscopy                                                                                                            | Diagnosis | ICD-9-CM  |
| 011.34 | Tuberculosis of bronchus, tubercle bacilli not found (in sputum) by microscopy, but found in bacterial culture                                                                        | Diagnosis | ICD-9-CM  |
| 011.35 | Tuberculosis of bronchus, tubercle bacilli not found by bacteriological examination, but tuberculosis confirmed histologically                                                        | Diagnosis | ICD-9-CM  |
| 011.36 | Tuberculosis of bronchus, tubercle bacilli not found by bacteriological or histological examination, but tuberculosis confirmed by other methods [inoculation of animals]             | Diagnosis | ICD-9-CM  |
| 011.4  | Tuberculous fibrosis of lung                                                                                                                                                          | Diagnosis | ICD-9-CM  |
| 011.40 | Tuberculous fibrosis of lung, confirmation unspecified                                                                                                                                | Diagnosis | ICD-9-CM  |
| 011.41 | Tuberculous fibrosis of lung, bacteriological or histological examination not done                                                                                                    | Diagnosis | ICD-9-CM  |
| 011.42 | Tuberculous fibrosis of lung, bacteriological or histological examination unknown (at present)                                                                                        | Diagnosis | ICD-9-CM  |
| 011.43 | Tuberculous fibrosis of lung, tubercle bacilli found (in sputum) by microscopy                                                                                                        | Diagnosis | ICD-9-CM  |
| 011.44 | Tuberculous fibrosis of lung, tubercle bacilli not found (in sputum) by microscopy,                                                                                                   | Diagnosis | ICD-9-CM  |
| 011.45 | Tuberculous fibrosis of lung, tubercle bacilli not found by bacteriological examination, but tuberculosis confirmed histologically                                                    | Diagnosis | ICD-9-CM  |
| 011.46 | Tuberculous fibrosis of lung, tubercle bacilli not found by bacteriological or histological examination, but tuberculosis confirmed by other methods [inoculation of animals]         | Diagnosis | ICD-9-CM  |
| 011.5  | Tuberculous bronchiectasis                                                                                                                                                            | Diagnosis | ICD-9-CM  |
| 011.50 | Tuberculous bronchiectasis, confirmation unspecified                                                                                                                                  | Diagnosis | ICD-9-CM  |

| Code   | Description                                                                                                                                                                       | Code      |           |
|--------|-----------------------------------------------------------------------------------------------------------------------------------------------------------------------------------|-----------|-----------|
|        |                                                                                                                                                                                   | Category  | Code Type |
| 011.51 | Tuberculous bronchiectasis, bacteriological or histological examination not done                                                                                                  | Diagnosis | ICD-9-CM  |
| 011.52 | Tuberculous bronchiectasis, bacteriological or histological examination unknown (at present)                                                                                      | Diagnosis | ICD-9-CM  |
| 011.53 | Tuberculous bronchiectasis, tubercle bacilli found (in sputum) by microscopy                                                                                                      | Diagnosis | ICD-9-CM  |
| 011.54 | Tuberculous bronchiectasis, tubercle bacilli not found (in sputum) by microscopy,                                                                                                 | Diagnosis | ICD-9-CM  |
| 011.55 | Tuberculous bronchiectasis, tubercle bacilli not found by bacteriological examination, but tuberculosis confirmed histologically                                                  | Diagnosis | ICD-9-CM  |
| 011.56 | Tuberculous bronchiectasis, tubercle bacilli not found by bacteriological or histological examination, but tuberculosis confirmed by other methods [inoculation of animals]       | Diagnosis | ICD-9-CM  |
| 011.6  | Tuberculous pneumonia (any form)                                                                                                                                                  | Diagnosis | ICD-9-CM  |
| 011.60 | Tuberculous pneumonia (any form), confirmation unspecified                                                                                                                        | Diagnosis | ICD-9-CM  |
| 011.61 | Tuberculous pneumonia (any form), bacteriological or histological examination not done                                                                                            | Diagnosis | ICD-9-CM  |
| 011.62 | Tuberculous pneumonia (any form), bacteriological or histological examination unknown (at present)                                                                                | Diagnosis | ICD-9-CM  |
| 011.63 | Tuberculous pneumonia (any form), tubercle bacilli found (in sputum) by microscopy                                                                                                | Diagnosis | ICD-9-CM  |
| 011.64 | Tuberculous pneumonia (any form), tubercle bacilli not found (in sputum) by microscopy, but found by bacterial culture                                                            | Diagnosis | ICD-9-CM  |
| 011.65 | Tuberculous pneumonia (any form), tubercle bacilli not found by bacteriological examination, but tuberculosis confirmed histologically                                            | Diagnosis | ICD-9-CM  |
| 011.66 | Tuberculous pneumonia (any form), tubercle bacilli not found by bacteriological or histological examination, but tuberculosis confirmed by other methods [inoculation of animals] | Diagnosis | ICD-9-CM  |
| 011.7  | Tuberculous pneumothorax                                                                                                                                                          | Diagnosis | ICD-9-CM  |
| 011.70 | Tuberculous pneumothorax, confirmation unspecified                                                                                                                                | Diagnosis | ICD-9-CM  |
| 011.71 | Tuberculous pneumothorax, bacteriological or histological examination not done                                                                                                    | Diagnosis | ICD-9-CM  |
| 011.72 | Tuberculous pneumothorax, bacteriological or histological examination unknown (at present)                                                                                        | Diagnosis | ICD-9-CM  |
| 011.73 | Tuberculous pneumothorax, tubercle bacilli not found (in sputum) by microscopy                                                                                                    | Diagnosis | ICD-9-CM  |
| 011.74 | Tuberculous pneumothorax, tubercle bacilli not found (in sputum) by microscopy,                                                                                                   | Diagnosis | ICD-9-CM  |
| 011.75 | Tuberculous pneumothorax, tubercle bacilli not found by bacteriological examination, but tuberculosis confirmed histologically                                                    | Diagnosis | ICD-9-CM  |
| 011.76 | Tuberculous pneumothorax, tubercle bacilli not found by bacteriological or histological examination but tuberculosis confirmed by other methods [inoculation of animals]          | Diagnosis | ICD-9-CM  |
| 011.8  | Other specified pulmonary tuberculosis                                                                                                                                            | Diagnosis | ICD-9-CM  |
| 011.80 | Other specified pulmonary tuberculosis, confirmation unspecified                                                                                                                  | Diagnosis | ICD-9-CM  |
| 011.81 | Other specified pulmonary tuberculosis, bacteriological or histological examination not done                                                                                      | Diagnosis | ICD-9-CM  |
| 011.82 | Other specified pulmonary tuberculosis, bacteriological or histological examination unknown (at present)                                                                          | Diagnosis | ICD-9-CM  |

| Code   | Description                                                                                                                                                                             | Code      |           |
|--------|-----------------------------------------------------------------------------------------------------------------------------------------------------------------------------------------|-----------|-----------|
|        |                                                                                                                                                                                         | Category  | Code Type |
| 011.83 | Other specified pulmonary tuberculosis, tubercle bacilli found (in sputum) by microscopy                                                                                                | Diagnosis | ICD-9-CM  |
| 011.84 | Other specified pulmonary tuberculosis, tubercle bacilli not found (in sputum) by microscopy, but found by bacterial culture                                                            | Diagnosis | ICD-9-CM  |
| 011.85 | Other specified pulmonary tuberculosis, tubercle bacilli not found by bacteriological examination, but tuberculosis confirmed histologically                                            | Diagnosis | ICD-9-CM  |
| 011.86 | Other specified pulmonary tuberculosis, tubercle bacilli not found by bacteriological or histological examination, but tuberculosis confirmed by other methods [inoculation of animals] | Diagnosis | ICD-9-CM  |
| 011.9  | Unspecified pulmonary tuberculosis                                                                                                                                                      | Diagnosis | ICD-9-CM  |
| 011.90 | Unspecified pulmonary tuberculosis, confirmation unspecified                                                                                                                            | Diagnosis | ICD-9-CM  |
| 011.91 | Unspecified pulmonary tuberculosis, bacteriological or histological examination not done                                                                                                | Diagnosis | ICD-9-CM  |
| 011.92 | Unspecified pulmonary tuberculosis, bacteriological or histological examination unknown (at present)                                                                                    | Diagnosis | ICD-9-CM  |
| 011.93 | Unspecified pulmonary tuberculosis, tubercle bacilli found (in sputum) by microscopy                                                                                                    | Diagnosis | ICD-9-CM  |
| 011.94 | Unspecified pulmonary tuberculosis, tubercle bacilli not found (in sputum) by microscopy, but found by bacterial culture                                                                | Diagnosis | ICD-9-CM  |
| 011.95 | Unspecified pulmonary tuberculosis, tubercle bacilli not found by bacteriological examination, but tuberculosis confirmed histologically                                                | Diagnosis | ICD-9-CM  |
| 011.96 | Unspecified pulmonary tuberculosis, tubercle bacilli not found by bacteriological or histological examination, but tuberculosis confirmed by other methods [inoculation of animals]     | Diagnosis | ICD-9-CM  |
| 012    | Other respiratory tuberculosis                                                                                                                                                          | Diagnosis | ICD-9-CM  |
| 012.0  | Tuberculous pleurisy                                                                                                                                                                    | Diagnosis | ICD-9-CM  |
| 012.00 | Tuberculous pleurisy, confirmation unspecified                                                                                                                                          | Diagnosis | ICD-9-CM  |
| 012.01 | Tuberculous pleurisy, bacteriological or histological examination not done                                                                                                              | Diagnosis | ICD-9-CM  |
| 012.02 | Tuberculous pleurisy, bacteriological or histological examination unknown (at present)                                                                                                  | Diagnosis | ICD-9-CM  |
| 012.03 | Tuberculous pleurisy, tubercle bacilli found (in sputum) by microscopy                                                                                                                  | Diagnosis | ICD-9-CM  |
| 012.04 | Tuberculous pleurisy, tubercle bacilli not found (in sputum) by microscopy, but found by bacterial culture                                                                              | Diagnosis | ICD-9-CM  |
| 012.05 | Tuberculous pleurisy, tubercle bacilli not found by bacteriological examination, but tuberculosis confirmed histologically                                                              | Diagnosis | ICD-9-CM  |
| 012.06 | Tuberculous pleurisy, tubercle bacilli not found by bacteriological or histological examination, but tuberculosis confirmed by other methods [inoculation of animals]                   | Diagnosis | ICD-9-CM  |
| 012.2  | Isolated tracheal or bronchial tuberculosis                                                                                                                                             | Diagnosis | ICD-9-CM  |
| 012.20 | Isolated tracheal or bronchial tuberculosis, unspecified                                                                                                                                | Diagnosis | ICD-9-CM  |
| 012.21 | Isolated tracheal or bronchial tuberculosis, bacteriological or histological examination not done                                                                                       | Diagnosis | ICD-9-CM  |
| 012.22 | Isolated tracheal or bronchial tuberculosis, bacteriological or histological examination unknown (at present)                                                                           | Diagnosis | ICD-9-CM  |

| Code                                       | Description                                                                                                                                                                                  | Code      |           |
|--------------------------------------------|----------------------------------------------------------------------------------------------------------------------------------------------------------------------------------------------|-----------|-----------|
|                                            |                                                                                                                                                                                              | Category  | Code Type |
| 012.23                                     | Isolated tracheal or bronchial tuberculosis, tubercle bacilli found (in sputum) by microscopy                                                                                                | Diagnosis | ICD-9-CM  |
| 012.24                                     | Isolated tracheal or bronchial tuberculosis, tubercle bacilli not found (in sputum) by microscopy, but found by bacterial culture                                                            | Diagnosis | ICD-9-CM  |
| 012.25                                     | Isolated tracheal or bronchial tuberculosis, tubercle bacilli not found by bacteriological examination, but tuberculosis confirmed histologically                                            | Diagnosis | ICD-9-CM  |
| 012.26                                     | Isolated tracheal or bronchial tuberculosis, tubercle bacilli not found by bacteriological or histological examination, but tuberculosis confirmed by other methods [inoculation of animals] | Diagnosis | ICD-9-CM  |
| 012.8                                      | Other specified respiratory tuberculosis                                                                                                                                                     | Diagnosis | ICD-9-CM  |
| 012.80                                     | Other specified respiratory tuberculosis, confirmation unspecified                                                                                                                           | Diagnosis | ICD-9-CM  |
| 012.81                                     | Other specified respiratory tuberculosis, bacteriological or histological examination not done                                                                                               | Diagnosis | ICD-9-CM  |
| 012.82                                     | Other specified respiratory tuberculosis, bacteriological or histological examination unknown (at present)                                                                                   | Diagnosis | ICD-9-CM  |
| 012.83                                     | Other specified respiratory tuberculosis, tubercle bacilli found (in sputum) by microscopy                                                                                                   | Diagnosis | ICD-9-CM  |
| 012.84                                     | Other specified respiratory tuberculosis, tubercle bacilli not found (in sputum) by microscopy, but found by bacterial culture                                                               | Diagnosis | ICD-9-CM  |
| 012.85                                     | Other specified respiratory tuberculosis, tubercle bacilli not found by bacteriological examination, but tuberculosis confirmed histologically                                               | Diagnosis | ICD-9-CM  |
| 012.86                                     | Other specified respiratory tuberculosis, tubercle bacilli not found by bacteriological or histological examination, but tuberculosis confirmed by other methods [inoculation of animals]    | Diagnosis | ICD-9-CM  |
| A15.0                                      | Tuberculosis of lung                                                                                                                                                                         | Diagnosis | ICD-10-CM |
| A15.5                                      | Tuberculosis of larynx, trachea and bronchus                                                                                                                                                 | Diagnosis | ICD-10-CM |
| A15.6                                      | Tuberculous pleurisy                                                                                                                                                                         | Diagnosis | ICD-10-CM |
| A15.7                                      | Primary respiratory tuberculosis                                                                                                                                                             | Diagnosis | ICD-10-CM |
| A15.8                                      | Other respiratory tuberculosis                                                                                                                                                               | Diagnosis | ICD-10-CM |
| A15.9                                      | Respiratory tuberculosis unspecified                                                                                                                                                         | Diagnosis | ICD-10-CM |
| Z86.11                                     | personal history of tuberculosis                                                                                                                                                             | Diagnosis | ICD-10-CM |
| J65                                        | Pneumoconiosis associated with tuberculosis                                                                                                                                                  | Diagnosis | ICD-10-CM |
| <b>Other Chronic Respiratory Disorders</b> |                                                                                                                                                                                              |           |           |
| B4481                                      | Allergic bronchopulmonary aspergillosis                                                                                                                                                      | Diagnosis | ICD-10-CM |
| G4734                                      | Idio sleep related nonobstructive alveolar hypoventilation                                                                                                                                   | Diagnosis | ICD-10-CM |
| G4736                                      | Sleep related hypoventilation in conditions classd elswhr                                                                                                                                    | Diagnosis | ICD-10-CM |
| G4739                                      | Other sleep apnea                                                                                                                                                                            | Diagnosis | ICD-10-CM |
| J61                                        | Pneumoconiosis due to asbestos and other mineral fibers                                                                                                                                      | Diagnosis | ICD-10-CM |
| J62                                        | Pneumoconiosis due to dust containing silica                                                                                                                                                 | Diagnosis | ICD-10-CM |
| J628                                       | Pneumoconiosis due to other dust containing silica                                                                                                                                           | Diagnosis | ICD-10-CM |
| J63                                        | Pneumoconiosis due to other inorganic dusts                                                                                                                                                  | Diagnosis | ICD-10-CM |
| J636                                       | Pneumoconiosis due to other specified inorganic dusts                                                                                                                                        | Diagnosis | ICD-10-CM |
| J65                                        | Pneumoconiosis associated with tuberculosis                                                                                                                                                  | Diagnosis | ICD-10-CM |
| J70                                        | Respiratory conditions due to other external agents                                                                                                                                          | Diagnosis | ICD-10-CM |
| J701                                       | Chronic and other pulmonary manifestations due to radiatio                                                                                                                                   | Diagnosis | ICD-10-CM |

| <b>Code</b> | <b>Description</b>                                              | <b>Code Category</b> | <b>Code Type</b> |
|-------------|-----------------------------------------------------------------|----------------------|------------------|
| J703        | Chronic drug-induced interstitial lung disorders                | Diagnosis            | ICD-10-CM        |
| J704        | Drug-induced interstitial lung disorders, unspecified           | Diagnosis            | ICD-10-CM        |
| J705        | Respiratory conditions due to smoke inhalation                  | Diagnosis            | ICD-10-CM        |
| J708        | Respiratory conditions due to oth external agents               | Diagnosis            | ICD-10-CM        |
| J709        | Respiratory conditions due to unspecified external agent        | Diagnosis            | ICD-10-CM        |
| J82         | Pulmonary eosinophilia, not elsewhere classified                | Diagnosis            | ICD-10-CM        |
| J828        | Pulmonary eosinophilia, not elsewhere classified                | Diagnosis            | ICD-10-CM        |
| J8289       | Other pulmonary eosinophilia, not elsewhere classified          | Diagnosis            | ICD-10-CM        |
| J84         | Other interstitial pulmonary diseases                           | Diagnosis            | ICD-10-CM        |
| J840        | Alveolar and parieto-alveolar conditions                        | Diagnosis            | ICD-10-CM        |
| J8409       | Other alveolar and parieto-alveolar conditions                  | Diagnosis            | ICD-10-CM        |
| J841        | Other interstitial pulmonary diseases with fibrosis             | Diagnosis            | ICD-10-CM        |
| J8410       | Pulmonary fibrosis, unspecified                                 | Diagnosis            | ICD-10-CM        |
| J84111      | Idiopathic interstitial pneumonia, not otherwise specified      | Diagnosis            | ICD-10-CM        |
| J84113      | Idiopathic non-specific interstitial pneumonitis                | Diagnosis            | ICD-10-CM        |
| J84115      | Respiratory bronchiolitis interstitial lung disease             | Diagnosis            | ICD-10-CM        |
| J84117      | Desquamative interstitial pneumonia                             | Diagnosis            | ICD-10-CM        |
| J8417       | Oth interstit pulmon dis w fibrosis in dis classd elswhr        | Diagnosis            | ICD-10-CM        |
| J84170      | Interstit lung dis w progr fibrotic phenotype dis classd e      | Diagnosis            | ICD-10-CM        |
| J84178      | Oth interstit pulmon dis with fibrosis in dis classd elswh      | Diagnosis            | ICD-10-CM        |
| J848        | Other specified interstitial pulmonary diseases                 | Diagnosis            | ICD-10-CM        |
| J8482       | Adult pulmonary Langerhans cell histiocytosis                   | Diagnosis            | ICD-10-CM        |
| J8484       | Other interstitial lung diseases of childhood                   | Diagnosis            | ICD-10-CM        |
| J84841      | Neuroendocrine cell hyperplasia of infancy                      | Diagnosis            | ICD-10-CM        |
| J84842      | Pulmonary interstitial glycogenosis                             | Diagnosis            | ICD-10-CM        |
| J84843      | Alveolar capillary dysplasia with vein misalignment             | Diagnosis            | ICD-10-CM        |
| J84848      | Other interstitial lung diseases of childhood                   | Diagnosis            | ICD-10-CM        |
| J8489       | Other specified interstitial pulmonary diseases                 | Diagnosis            | ICD-10-CM        |
| J849        | Interstitial pulmonary disease, unspecified                     | Diagnosis            | ICD-10-CM        |
| J91         | Pleural effusion in conditions classified elsewhere             | Diagnosis            | ICD-10-CM        |
| J920        | Pleural plaque with presence of asbestos                        | Diagnosis            | ICD-10-CM        |
| P27         | Chronic respiratory disease originating in the perinatal period | Diagnosis            | ICD-10-CM        |
| P270        | Wilson-Mikity syndrome                                          | Diagnosis            | ICD-10-CM        |
| P271        | Bronchopulmonary dysplasia origin in the perinatal period       | Diagnosis            | ICD-10-CM        |
| P278        | Oth chronic resp diseases origin in the perinatal period        | Diagnosis            | ICD-10-CM        |
| P279        | Unsp chronic resp disease origin in the perinatal period        | Diagnosis            | ICD-10-CM        |
| J410        | Simple chronic bronchitis                                       | Diagnosis            | ICD-10-CM        |
| J411        | Mucopurulent chronic bronchitis                                 | Diagnosis            | ICD-10-CM        |
| J418        | Mixed simple and mucopurulent chronic bronchitis                | Diagnosis            | ICD-10-CM        |
| J44         | Other chronic obstructive pulmonary disease                     | Diagnosis            | ICD-10-CM        |
| J982        | Interstitial emphysema                                          | Diagnosis            | ICD-10-CM        |
| J983        | compensatory emphysema                                          | Diagnosis            | ICD-10-CM        |
| J984        | other disorders of lung                                         | Diagnosis            | ICD-10-CM        |
| J989        | Respiratory disease (chronic) NOS                               | Diagnosis            | ICD-10-CM        |
| J961        | Chronic respiratory failure                                     | Diagnosis            | ICD-10-CM        |



| Code            | Description                                                                                            | Code      |           |
|-----------------|--------------------------------------------------------------------------------------------------------|-----------|-----------|
|                 |                                                                                                        | Category  | Code Type |
| <b>Diabetes</b> |                                                                                                        |           |           |
| 250.01          | Diabetes mellitus without mention of complication, type I [juvenile type], not stated as uncontrolled  | Diagnosis | ICD-9-CM  |
| 250.03          | Diabetes mellitus without mention of complication, type I [juvenile type], uncontrolled                | Diagnosis | ICD-9-CM  |
| 250.11          | Diabetes with ketoacidosis, type I [juvenile type], not stated as uncontrolled                         | Diagnosis | ICD-9-CM  |
| 250.13          | Diabetes with ketoacidosis, type I [juvenile type], uncontrolled                                       | Diagnosis | ICD-9-CM  |
| 250.21          | Diabetes with hyperosmolarity, type I [juvenile type], not stated as uncontrolled                      | Diagnosis | ICD-9-CM  |
| 250.23          | Diabetes with hyperosmolarity, type I [juvenile type], uncontrolled                                    | Diagnosis | ICD-9-CM  |
| 250.31          | Diabetes with other coma, type I [juvenile type], not stated as uncontrolled                           | Diagnosis | ICD-9-CM  |
| 250.33          | Diabetes with other coma, type I [juvenile type], uncontrolled                                         | Diagnosis | ICD-9-CM  |
| 250.41          | Diabetes with renal manifestations, type I [juvenile type], not stated as uncontrolled                 | Diagnosis | ICD-9-CM  |
| 250.43          | Diabetes with renal manifestations, type I [juvenile type], uncontrolled                               | Diagnosis | ICD-9-CM  |
| 250.51          | Diabetes with ophthalmic manifestations, type I [juvenile type], not stated as uncontrolled            | Diagnosis | ICD-9-CM  |
| 250.53          | Diabetes with ophthalmic manifestations, type I [juvenile type], uncontrolled                          | Diagnosis | ICD-9-CM  |
| 250.61          | Diabetes with neurological manifestations, type I [juvenile type], not stated as uncontrolled          | Diagnosis | ICD-9-CM  |
| 250.63          | Diabetes with neurological manifestations, type I [juvenile type], uncontrolled                        | Diagnosis | ICD-9-CM  |
| 250.71          | Diabetes with peripheral circulatory disorders, type I [juvenile type], not stated as uncontrolled     | Diagnosis | ICD-9-CM  |
| 250.73          | Diabetes with peripheral circulatory disorders, type I [juvenile type], uncontrolled                   | Diagnosis | ICD-9-CM  |
| 250.81          | Diabetes with other specified manifestations, type I [juvenile type], not stated as uncontrolled       | Diagnosis | ICD-9-CM  |
| 250.83          | Diabetes with other specified manifestations, type I [juvenile type], uncontrolled                     | Diagnosis | ICD-9-CM  |
| 250.91          | Diabetes with unspecified complication, type I [juvenile type], not stated as uncontrolled             | Diagnosis | ICD-9-CM  |
| 250.93          | Diabetes with unspecified complication, type I [juvenile type], uncontrolled                           | Diagnosis | ICD-9-CM  |
| E10.10          | Type 1 diabetes mellitus with ketoacidosis without coma                                                | Diagnosis | ICD-10-CM |
| E10.11          | Type 1 diabetes mellitus with ketoacidosis with coma                                                   | Diagnosis | ICD-10-CM |
| E10.21          | Type 1 diabetes mellitus with diabetic nephropathy                                                     | Diagnosis | ICD-10-CM |
| E10.22          | Type 1 diabetes mellitus with diabetic chronic kidney disease                                          | Diagnosis | ICD-10-CM |
| E10.29          | Type 1 diabetes mellitus with other diabetic kidney complication                                       | Diagnosis | ICD-10-CM |
| E10.311         | Type 1 diabetes mellitus with unspecified diabetic retinopathy with macular edema                      | Diagnosis | ICD-10-CM |
| E10.319         | Type 1 diabetes mellitus with unspecified diabetic retinopathy without macular edema                   | Diagnosis | ICD-10-CM |
| E10.3211        | Type 1 diabetes mellitus with mild nonproliferative diabetic retinopathy with macular edema, right eye | Diagnosis | ICD-10-CM |
| E10.3212        | Type 1 diabetes mellitus with mild nonproliferative diabetic retinopathy with macular edema, left eye  | Diagnosis | ICD-10-CM |
| E10.3213        | Type 1 diabetes mellitus with mild nonproliferative diabetic retinopathy with macular edema, bilateral | Diagnosis | ICD-10-CM |

| Code     | Description                                                                                                         | Code      |           |
|----------|---------------------------------------------------------------------------------------------------------------------|-----------|-----------|
|          |                                                                                                                     | Category  | Code Type |
| E10.3219 | Type 1 diabetes mellitus with mild nonproliferative diabetic retinopathy with macular edema, unspecified eye        | Diagnosis | ICD-10-CM |
| E10.3291 | Type 1 diabetes mellitus with mild nonproliferative diabetic retinopathy without macular edema, right eye           | Diagnosis | ICD-10-CM |
| E10.3292 | Type 1 diabetes mellitus with mild nonproliferative diabetic retinopathy without macular edema, left eye            | Diagnosis | ICD-10-CM |
| E10.3293 | Type 1 diabetes mellitus with mild nonproliferative diabetic retinopathy without macular edema, bilateral           | Diagnosis | ICD-10-CM |
| E10.3299 | Type 1 diabetes mellitus with mild nonproliferative diabetic retinopathy without macular edema, unspecified eye     | Diagnosis | ICD-10-CM |
| E10.3311 | Type 1 diabetes mellitus with moderate nonproliferative diabetic retinopathy with macular edema, right eye          | Diagnosis | ICD-10-CM |
| E10.3312 | Type 1 diabetes mellitus with moderate nonproliferative diabetic retinopathy with macular edema, left eye           | Diagnosis | ICD-10-CM |
| E10.3313 | Type 1 diabetes mellitus with moderate nonproliferative diabetic retinopathy with macular edema, bilateral          | Diagnosis | ICD-10-CM |
| E10.3319 | Type 1 diabetes mellitus with moderate nonproliferative diabetic retinopathy with macular edema, unspecified eye    | Diagnosis | ICD-10-CM |
| E10.3391 | Type 1 diabetes mellitus with moderate nonproliferative diabetic retinopathy without macular edema, right eye       | Diagnosis | ICD-10-CM |
| E10.3392 | Type 1 diabetes mellitus with moderate nonproliferative diabetic retinopathy without macular edema, left eye        | Diagnosis | ICD-10-CM |
| E10.3393 | Type 1 diabetes mellitus with moderate nonproliferative diabetic retinopathy without macular edema, bilateral       | Diagnosis | ICD-10-CM |
| E10.3399 | Type 1 diabetes mellitus with moderate nonproliferative diabetic retinopathy without macular edema, unspecified eye | Diagnosis | ICD-10-CM |
| E10.3411 | Type 1 diabetes mellitus with severe nonproliferative diabetic retinopathy with macular edema, right eye            | Diagnosis | ICD-10-CM |
| E10.3412 | Type 1 diabetes mellitus with severe nonproliferative diabetic retinopathy with macular edema, left eye             | Diagnosis | ICD-10-CM |
| E10.3413 | Type 1 diabetes mellitus with severe nonproliferative diabetic retinopathy with macular edema, bilateral            | Diagnosis | ICD-10-CM |
| E10.3419 | Type 1 diabetes mellitus with severe nonproliferative diabetic retinopathy with macular edema, unspecified eye      | Diagnosis | ICD-10-CM |
| E10.3491 | Type 1 diabetes mellitus with severe nonproliferative diabetic retinopathy without macular edema, right eye         | Diagnosis | ICD-10-CM |
| E10.3492 | Type 1 diabetes mellitus with severe nonproliferative diabetic retinopathy without macular edema, left eye          | Diagnosis | ICD-10-CM |
| E10.3493 | Type 1 diabetes mellitus with severe nonproliferative diabetic retinopathy without macular edema, bilateral         | Diagnosis | ICD-10-CM |
| E10.3499 | Type 1 diabetes mellitus with severe nonproliferative diabetic retinopathy without macular edema, unspecified eye   | Diagnosis | ICD-10-CM |
| E10.3511 | Type 1 diabetes mellitus with proliferative diabetic retinopathy with macular edema, right eye                      | Diagnosis | ICD-10-CM |
| E10.3512 | Type 1 diabetes mellitus with proliferative diabetic retinopathy with macular edema, left eye                       | Diagnosis | ICD-10-CM |

| Code     | Description                                                                                                                                                       | Code      |           |
|----------|-------------------------------------------------------------------------------------------------------------------------------------------------------------------|-----------|-----------|
|          |                                                                                                                                                                   | Category  | Code Type |
| E10.3513 | Type 1 diabetes mellitus with proliferative diabetic retinopathy with macular edema, bilateral                                                                    | Diagnosis | ICD-10-CM |
| E10.3519 | Type 1 diabetes mellitus with proliferative diabetic retinopathy with macular edema, unspecified eye                                                              | Diagnosis | ICD-10-CM |
| E10.3521 | Type 1 diabetes mellitus with proliferative diabetic retinopathy with traction retinal detachment involving the macula, right eye                                 | Diagnosis | ICD-10-CM |
| E10.3522 | Type 1 diabetes mellitus with proliferative diabetic retinopathy with traction retinal detachment involving the macula, left eye                                  | Diagnosis | ICD-10-CM |
| E10.3523 | Type 1 diabetes mellitus with proliferative diabetic retinopathy with traction retinal detachment involving the macula, bilateral                                 | Diagnosis | ICD-10-CM |
| E10.3529 | Type 1 diabetes mellitus with proliferative diabetic retinopathy with traction retinal detachment involving the macula, unspecified eye                           | Diagnosis | ICD-10-CM |
| E10.3531 | Type 1 diabetes mellitus with proliferative diabetic retinopathy with traction retinal detachment not involving the macula, right eye                             | Diagnosis | ICD-10-CM |
| E10.3532 | Type 1 diabetes mellitus with proliferative diabetic retinopathy with traction retinal detachment not involving the macula, left eye                              | Diagnosis | ICD-10-CM |
| E10.3533 | Type 1 diabetes mellitus with proliferative diabetic retinopathy with traction retinal detachment not involving the macula, bilateral                             | Diagnosis | ICD-10-CM |
| E10.3539 | Type 1 diabetes mellitus with proliferative diabetic retinopathy with traction retinal detachment not involving the macula, unspecified eye                       | Diagnosis | ICD-10-CM |
| E10.3541 | Type 1 diabetes mellitus with proliferative diabetic retinopathy with combined traction retinal detachment and rhegmatogenous retinal detachment, right eye       | Diagnosis | ICD-10-CM |
| E10.3542 | Type 1 diabetes mellitus with proliferative diabetic retinopathy with combined traction retinal detachment and rhegmatogenous retinal detachment, left eye        | Diagnosis | ICD-10-CM |
| E10.3543 | Type 1 diabetes mellitus with proliferative diabetic retinopathy with combined traction retinal detachment and rhegmatogenous retinal detachment, bilateral       | Diagnosis | ICD-10-CM |
| E10.3549 | Type 1 diabetes mellitus with proliferative diabetic retinopathy with combined traction retinal detachment and rhegmatogenous retinal detachment, unspecified eye | Diagnosis | ICD-10-CM |
| E10.3551 | Type 1 diabetes mellitus with stable proliferative diabetic retinopathy, right eye                                                                                | Diagnosis | ICD-10-CM |
| E10.3552 | Type 1 diabetes mellitus with stable proliferative diabetic retinopathy, left eye                                                                                 | Diagnosis | ICD-10-CM |
| E10.3553 | Type 1 diabetes mellitus with stable proliferative diabetic retinopathy, bilateral                                                                                | Diagnosis | ICD-10-CM |
| E10.3559 | Type 1 diabetes mellitus with stable proliferative diabetic retinopathy, unspecified eye                                                                          | Diagnosis | ICD-10-CM |
| E10.3591 | Type 1 diabetes mellitus with proliferative diabetic retinopathy without macular edema, right eye                                                                 | Diagnosis | ICD-10-CM |
| E10.3592 | Type 1 diabetes mellitus with proliferative diabetic retinopathy without macular edema, left eye                                                                  | Diagnosis | ICD-10-CM |
| E10.3593 | Type 1 diabetes mellitus with proliferative diabetic retinopathy without macular edema, bilateral                                                                 | Diagnosis | ICD-10-CM |
| E10.3599 | Type 1 diabetes mellitus with proliferative diabetic retinopathy without macular edema, unspecified eye                                                           | Diagnosis | ICD-10-CM |
| E10.36   | Type 1 diabetes mellitus with diabetic cataract                                                                                                                   | Diagnosis | ICD-10-CM |
| E10.37X1 | Type 1 diabetes mellitus with diabetic macular edema, resolved following treatment, right eye                                                                     | Diagnosis | ICD-10-CM |

| Code     | Description                                                                                                | Code      |           |
|----------|------------------------------------------------------------------------------------------------------------|-----------|-----------|
|          |                                                                                                            | Category  | Code Type |
| E10.37X2 | Type 1 diabetes mellitus with diabetic macular edema, resolved following treatment, left eye               | Diagnosis | ICD-10-CM |
| E10.37X3 | Type 1 diabetes mellitus with diabetic macular edema, resolved following treatment, bilateral              | Diagnosis | ICD-10-CM |
| E10.37X9 | Type 1 diabetes mellitus with diabetic macular edema, resolved following treatment, unspecified eye        | Diagnosis | ICD-10-CM |
| E10.39   | Type 1 diabetes mellitus with other diabetic ophthalmic complication                                       | Diagnosis | ICD-10-CM |
| E10.40   | Type 1 diabetes mellitus with diabetic neuropathy, unspecified                                             | Diagnosis | ICD-10-CM |
| E10.41   | Type 1 diabetes mellitus with diabetic mononeuropathy                                                      | Diagnosis | ICD-10-CM |
| E10.42   | Type 1 diabetes mellitus with diabetic polyneuropathy                                                      | Diagnosis | ICD-10-CM |
| E10.43   | Type 1 diabetes mellitus with diabetic autonomic (poly)neuropathy                                          | Diagnosis | ICD-10-CM |
| E10.44   | Type 1 diabetes mellitus with diabetic amyotrophy                                                          | Diagnosis | ICD-10-CM |
| E10.49   | Type 1 diabetes mellitus with other diabetic neurological complication                                     | Diagnosis | ICD-10-CM |
| E10.51   | Type 1 diabetes mellitus with diabetic peripheral angiopathy without gangrene                              | Diagnosis | ICD-10-CM |
| E10.52   | Type 1 diabetes mellitus with diabetic peripheral angiopathy with gangrene                                 | Diagnosis | ICD-10-CM |
| E10.59   | Type 1 diabetes mellitus with other circulatory complications                                              | Diagnosis | ICD-10-CM |
| E10.610  | Type 1 diabetes mellitus with diabetic neuropathic arthropathy                                             | Diagnosis | ICD-10-CM |
| E10.618  | Type 1 diabetes mellitus with other diabetic arthropathy                                                   | Diagnosis | ICD-10-CM |
| E10.620  | Type 1 diabetes mellitus with diabetic dermatitis                                                          | Diagnosis | ICD-10-CM |
| E10.621  | Type 1 diabetes mellitus with foot ulcer                                                                   | Diagnosis | ICD-10-CM |
| E10.622  | Type 1 diabetes mellitus with other skin ulcer                                                             | Diagnosis | ICD-10-CM |
| E10.628  | Type 1 diabetes mellitus with other skin complications                                                     | Diagnosis | ICD-10-CM |
| E10.630  | Type 1 diabetes mellitus with periodontal disease                                                          | Diagnosis | ICD-10-CM |
| E10.638  | Type 1 diabetes mellitus with other oral complications                                                     | Diagnosis | ICD-10-CM |
| E10.641  | Type 1 diabetes mellitus with hypoglycemia with coma                                                       | Diagnosis | ICD-10-CM |
| E10.649  | Type 1 diabetes mellitus with hypoglycemia without coma                                                    | Diagnosis | ICD-10-CM |
| E10.65   | Type 1 diabetes mellitus with hyperglycemia                                                                | Diagnosis | ICD-10-CM |
| E10.69   | Type 1 diabetes mellitus with other specified complication                                                 | Diagnosis | ICD-10-CM |
| E10.8    | Type 1 diabetes mellitus with unspecified complications                                                    | Diagnosis | ICD-10-CM |
| E10.9    | Type 1 diabetes mellitus without complications                                                             | Diagnosis | ICD-10-CM |
| 250.00   | Diabetes mellitus without mention of complication, type II or unspecified type, not stated as uncontrolled | Diagnosis | ICD-9-CM  |
| 250.10   | Diabetes with ketoacidosis, type II or unspecified type, not stated as uncontrolled                        | Diagnosis | ICD-9-CM  |
| 250.20   | Diabetes with hyperosmolarity, type II or unspecified type, not stated as uncontrolled                     | Diagnosis | ICD-9-CM  |
| 250.30   | Diabetes with other coma, type II or unspecified type, not stated as uncontrolled                          | Diagnosis | ICD-9-CM  |
| 250.40   | Diabetes with renal manifestations, type II or unspecified type, not stated as uncontrolled                | Diagnosis | ICD-9-CM  |
| 250.50   | Diabetes with ophthalmic manifestations, type II or unspecified type, not stated as uncontrolled           | Diagnosis | ICD-9-CM  |
| 250.60   | Diabetes with neurological manifestations, type II or unspecified type, not stated as uncontrolled         | Diagnosis | ICD-9-CM  |
| 250.70   | Diabetes with peripheral circulatory disorders, type II or unspecified type, not stated as uncontrolled    | Diagnosis | ICD-9-CM  |

| Code     | Description                                                                                                  | Code      |           |
|----------|--------------------------------------------------------------------------------------------------------------|-----------|-----------|
|          |                                                                                                              | Category  | Code Type |
| 250.80   | Diabetes with other specified manifestations, type II or unspecified type, not stated as uncontrolled        | Diagnosis | ICD-9-CM  |
| 250.90   | Diabetes with unspecified complication, type II or unspecified type, not stated as uncontrolled              | Diagnosis | ICD-9-CM  |
| 250.02   | Diabetes mellitus without mention of complication, type II or unspecified type, uncontrolled                 | Diagnosis | ICD-9-CM  |
| 250.12   | Diabetes with ketoacidosis, type II or unspecified type, uncontrolled                                        | Diagnosis | ICD-9-CM  |
| 250.22   | Diabetes with hyperosmolarity, type II or unspecified type, uncontrolled                                     | Diagnosis | ICD-9-CM  |
| 250.32   | Diabetes with other coma, type II or unspecified type, uncontrolled                                          | Diagnosis | ICD-9-CM  |
| 250.42   | Diabetes with renal manifestations, type II or unspecified type, uncontrolled                                | Diagnosis | ICD-9-CM  |
| 250.52   | Diabetes with ophthalmic manifestations, type II or unspecified type, uncontrolled                           | Diagnosis | ICD-9-CM  |
| 250.62   | Diabetes with neurological manifestations, type II or unspecified type, uncontrolled                         | Diagnosis | ICD-9-CM  |
| 250.72   | Diabetes with peripheral circulatory disorders, type II or unspecified type, uncontrolled                    | Diagnosis | ICD-9-CM  |
| 250.82   | Diabetes with other specified manifestations, type II or unspecified type, uncontrolled                      | Diagnosis | ICD-9-CM  |
| 250.92   | Diabetes with unspecified complication, type II or unspecified type, uncontrolled                            | Diagnosis | ICD-9-CM  |
| E11.00   | Type 2 diabetes mellitus with hyperosmolarity without nonketotic hyperglycemic-hyperosmolar coma (NKHHC)     | Diagnosis | ICD-10-CM |
| E11.01   | Type 2 diabetes mellitus with hyperosmolarity with coma                                                      | Diagnosis | ICD-10-CM |
| E11.10   | Type 2 diabetes mellitus with ketoacidosis without coma                                                      | Diagnosis | ICD-10-CM |
| E11.11   | Type 2 diabetes mellitus with ketoacidosis with coma                                                         | Diagnosis | ICD-10-CM |
| E11.21   | Type 2 diabetes mellitus with diabetic nephropathy                                                           | Diagnosis | ICD-10-CM |
| E11.22   | Type 2 diabetes mellitus with diabetic chronic kidney disease                                                | Diagnosis | ICD-10-CM |
| E11.29   | Type 2 diabetes mellitus with other diabetic kidney complication                                             | Diagnosis | ICD-10-CM |
| E11.311  | Type 2 diabetes mellitus with unspecified diabetic retinopathy with macular edema                            | Diagnosis | ICD-10-CM |
| E11.319  | Type 2 diabetes mellitus with unspecified diabetic retinopathy without macular edema                         | Diagnosis | ICD-10-CM |
| E11.3211 | Type 2 diabetes mellitus with mild nonproliferative diabetic retinopathy with macular edema, right eye       | Diagnosis | ICD-10-CM |
| E11.3212 | Type 2 diabetes mellitus with mild nonproliferative diabetic retinopathy with macular edema, left eye        | Diagnosis | ICD-10-CM |
| E11.3213 | Type 2 diabetes mellitus with mild nonproliferative diabetic retinopathy with macular edema, bilateral       | Diagnosis | ICD-10-CM |
| E11.3219 | Type 2 diabetes mellitus with mild nonproliferative diabetic retinopathy with macular edema, unspecified eye | Diagnosis | ICD-10-CM |
| E11.3291 | Type 2 diabetes mellitus with mild nonproliferative diabetic retinopathy without macular edema, right eye    | Diagnosis | ICD-10-CM |
| E11.3292 | Type 2 diabetes mellitus with mild nonproliferative diabetic retinopathy without macular edema, left eye     | Diagnosis | ICD-10-CM |
| E11.3293 | Type 2 diabetes mellitus with mild nonproliferative diabetic retinopathy without macular edema, bilateral    | Diagnosis | ICD-10-CM |

| Code     | Description                                                                                                                       | Code      |           |
|----------|-----------------------------------------------------------------------------------------------------------------------------------|-----------|-----------|
|          |                                                                                                                                   | Category  | Code Type |
| E11.3299 | Type 2 diabetes mellitus with mild nonproliferative diabetic retinopathy without macular edema, unspecified eye                   | Diagnosis | ICD-10-CM |
| E11.3311 | Type 2 diabetes mellitus with moderate nonproliferative diabetic retinopathy with macular edema, right eye                        | Diagnosis | ICD-10-CM |
| E11.3312 | Type 2 diabetes mellitus with moderate nonproliferative diabetic retinopathy with macular edema, left eye                         | Diagnosis | ICD-10-CM |
| E11.3313 | Type 2 diabetes mellitus with moderate nonproliferative diabetic retinopathy with macular edema, bilateral                        | Diagnosis | ICD-10-CM |
| E11.3319 | Type 2 diabetes mellitus with moderate nonproliferative diabetic retinopathy with macular edema, unspecified eye                  | Diagnosis | ICD-10-CM |
| E11.3391 | Type 2 diabetes mellitus with moderate nonproliferative diabetic retinopathy without macular edema, right eye                     | Diagnosis | ICD-10-CM |
| E11.3392 | Type 2 diabetes mellitus with moderate nonproliferative diabetic retinopathy without macular edema, left eye                      | Diagnosis | ICD-10-CM |
| E11.3393 | Type 2 diabetes mellitus with moderate nonproliferative diabetic retinopathy without macular edema, bilateral                     | Diagnosis | ICD-10-CM |
| E11.3399 | Type 2 diabetes mellitus with moderate nonproliferative diabetic retinopathy without macular edema, unspecified eye               | Diagnosis | ICD-10-CM |
| E11.3411 | Type 2 diabetes mellitus with severe nonproliferative diabetic retinopathy with macular edema, right eye                          | Diagnosis | ICD-10-CM |
| E11.3412 | Type 2 diabetes mellitus with severe nonproliferative diabetic retinopathy with macular edema, left eye                           | Diagnosis | ICD-10-CM |
| E11.3413 | Type 2 diabetes mellitus with severe nonproliferative diabetic retinopathy with macular edema, bilateral                          | Diagnosis | ICD-10-CM |
| E11.3419 | Type 2 diabetes mellitus with severe nonproliferative diabetic retinopathy with macular edema, unspecified eye                    | Diagnosis | ICD-10-CM |
| E11.3491 | Type 2 diabetes mellitus with severe nonproliferative diabetic retinopathy without macular edema, right eye                       | Diagnosis | ICD-10-CM |
| E11.3492 | Type 2 diabetes mellitus with severe nonproliferative diabetic retinopathy without macular edema, left eye                        | Diagnosis | ICD-10-CM |
| E11.3493 | Type 2 diabetes mellitus with severe nonproliferative diabetic retinopathy without macular edema, bilateral                       | Diagnosis | ICD-10-CM |
| E11.3499 | Type 2 diabetes mellitus with severe nonproliferative diabetic retinopathy without macular edema, unspecified eye                 | Diagnosis | ICD-10-CM |
| E11.3511 | Type 2 diabetes mellitus with proliferative diabetic retinopathy with macular edema, right eye                                    | Diagnosis | ICD-10-CM |
| E11.3512 | Type 2 diabetes mellitus with proliferative diabetic retinopathy with macular edema, left eye                                     | Diagnosis | ICD-10-CM |
| E11.3513 | Type 2 diabetes mellitus with proliferative diabetic retinopathy with macular edema, bilateral                                    | Diagnosis | ICD-10-CM |
| E11.3519 | Type 2 diabetes mellitus with proliferative diabetic retinopathy with macular edema, unspecified eye                              | Diagnosis | ICD-10-CM |
| E11.3521 | Type 2 diabetes mellitus with proliferative diabetic retinopathy with traction retinal detachment involving the macula, right eye | Diagnosis | ICD-10-CM |

| Code     | Description                                                                                                                                                       | Code      |           |
|----------|-------------------------------------------------------------------------------------------------------------------------------------------------------------------|-----------|-----------|
|          |                                                                                                                                                                   | Category  | Code Type |
| E11.3522 | Type 2 diabetes mellitus with proliferative diabetic retinopathy with traction retinal detachment involving the macula, left eye                                  | Diagnosis | ICD-10-CM |
| E11.3523 | Type 2 diabetes mellitus with proliferative diabetic retinopathy with traction retinal detachment involving the macula, bilateral                                 | Diagnosis | ICD-10-CM |
| E11.3529 | Type 2 diabetes mellitus with proliferative diabetic retinopathy with traction retinal detachment involving the macula, unspecified eye                           | Diagnosis | ICD-10-CM |
| E11.3531 | Type 2 diabetes mellitus with proliferative diabetic retinopathy with traction retinal detachment not involving the macula, right eye                             | Diagnosis | ICD-10-CM |
| E11.3532 | Type 2 diabetes mellitus with proliferative diabetic retinopathy with traction retinal detachment not involving the macula, left eye                              | Diagnosis | ICD-10-CM |
| E11.3533 | Type 2 diabetes mellitus with proliferative diabetic retinopathy with traction retinal detachment not involving the macula, bilateral                             | Diagnosis | ICD-10-CM |
| E11.3539 | Type 2 diabetes mellitus with proliferative diabetic retinopathy with traction retinal detachment not involving the macula, unspecified eye                       | Diagnosis | ICD-10-CM |
| E11.3541 | Type 2 diabetes mellitus with proliferative diabetic retinopathy with combined traction retinal detachment and rhegmatogenous retinal detachment, right eye       | Diagnosis | ICD-10-CM |
| E11.3542 | Type 2 diabetes mellitus with proliferative diabetic retinopathy with combined traction retinal detachment and rhegmatogenous retinal detachment, left eye        | Diagnosis | ICD-10-CM |
| E11.3543 | Type 2 diabetes mellitus with proliferative diabetic retinopathy with combined traction retinal detachment and rhegmatogenous retinal detachment, bilateral       | Diagnosis | ICD-10-CM |
| E11.3549 | Type 2 diabetes mellitus with proliferative diabetic retinopathy with combined traction retinal detachment and rhegmatogenous retinal detachment, unspecified eye | Diagnosis | ICD-10-CM |
| E11.3551 | Type 2 diabetes mellitus with stable proliferative diabetic retinopathy, right eye                                                                                | Diagnosis | ICD-10-CM |
| E11.3552 | Type 2 diabetes mellitus with stable proliferative diabetic retinopathy, left eye                                                                                 | Diagnosis | ICD-10-CM |
| E11.3553 | Type 2 diabetes mellitus with stable proliferative diabetic retinopathy, bilateral                                                                                | Diagnosis | ICD-10-CM |
| E11.3559 | Type 2 diabetes mellitus with stable proliferative diabetic retinopathy, unspecified eye                                                                          | Diagnosis | ICD-10-CM |
| E11.3591 | Type 2 diabetes mellitus with proliferative diabetic retinopathy without macular edema, right eye                                                                 | Diagnosis | ICD-10-CM |
| E11.3592 | Type 2 diabetes mellitus with proliferative diabetic retinopathy without macular edema, left eye                                                                  | Diagnosis | ICD-10-CM |
| E11.3593 | Type 2 diabetes mellitus with proliferative diabetic retinopathy without macular edema, bilateral                                                                 | Diagnosis | ICD-10-CM |
| E11.3599 | Type 2 diabetes mellitus with proliferative diabetic retinopathy without macular edema, unspecified eye                                                           | Diagnosis | ICD-10-CM |
| E11.36   | Type 2 diabetes mellitus with diabetic cataract                                                                                                                   | Diagnosis | ICD-10-CM |
| E11.37X1 | Type 2 diabetes mellitus with diabetic macular edema, resolved following treatment, right eye                                                                     | Diagnosis | ICD-10-CM |
| E11.37X2 | Type 2 diabetes mellitus with diabetic macular edema, resolved following treatment, left eye                                                                      | Diagnosis | ICD-10-CM |
| E11.37X3 | Type 2 diabetes mellitus with diabetic macular edema, resolved following treatment, bilateral                                                                     | Diagnosis | ICD-10-CM |
| E11.37X9 | Type 2 diabetes mellitus with diabetic macular edema, resolved following treatment, unspecified eye                                                               | Diagnosis | ICD-10-CM |

| Code     | Description                                                                                                           | Code      |           |
|----------|-----------------------------------------------------------------------------------------------------------------------|-----------|-----------|
|          |                                                                                                                       | Category  | Code Type |
| E11.39   | Type 2 diabetes mellitus with other diabetic ophthalmic complication                                                  | Diagnosis | ICD-10-CM |
| E11.40   | Type 2 diabetes mellitus with diabetic neuropathy, unspecified                                                        | Diagnosis | ICD-10-CM |
| E11.41   | Type 2 diabetes mellitus with diabetic mononeuropathy                                                                 | Diagnosis | ICD-10-CM |
| E11.42   | Type 2 diabetes mellitus with diabetic polyneuropathy                                                                 | Diagnosis | ICD-10-CM |
| E11.43   | Type 2 diabetes mellitus with diabetic autonomic (poly)neuropathy                                                     | Diagnosis | ICD-10-CM |
| E11.44   | Type 2 diabetes mellitus with diabetic amyotrophy                                                                     | Diagnosis | ICD-10-CM |
| E11.49   | Type 2 diabetes mellitus with other diabetic neurological complication                                                | Diagnosis | ICD-10-CM |
| E11.51   | Type 2 diabetes mellitus with diabetic peripheral angiopathy without gangrene                                         | Diagnosis | ICD-10-CM |
| E11.52   | Type 2 diabetes mellitus with diabetic peripheral angiopathy with gangrene                                            | Diagnosis | ICD-10-CM |
| E11.59   | Type 2 diabetes mellitus with other circulatory complications                                                         | Diagnosis | ICD-10-CM |
| E11.610  | Type 2 diabetes mellitus with diabetic neuropathic arthropathy                                                        | Diagnosis | ICD-10-CM |
| E11.618  | Type 2 diabetes mellitus with other diabetic arthropathy                                                              | Diagnosis | ICD-10-CM |
| E11.620  | Type 2 diabetes mellitus with diabetic dermatitis                                                                     | Diagnosis | ICD-10-CM |
| E11.621  | Type 2 diabetes mellitus with foot ulcer                                                                              | Diagnosis | ICD-10-CM |
| E11.622  | Type 2 diabetes mellitus with other skin ulcer                                                                        | Diagnosis | ICD-10-CM |
| E11.628  | Type 2 diabetes mellitus with other skin complications                                                                | Diagnosis | ICD-10-CM |
| E11.630  | Type 2 diabetes mellitus with periodontal disease                                                                     | Diagnosis | ICD-10-CM |
| E11.638  | Type 2 diabetes mellitus with other oral complications                                                                | Diagnosis | ICD-10-CM |
| E11.641  | Type 2 diabetes mellitus with hypoglycemia with coma                                                                  | Diagnosis | ICD-10-CM |
| E11.649  | Type 2 diabetes mellitus with hypoglycemia without coma                                                               | Diagnosis | ICD-10-CM |
| E11.65   | Type 2 diabetes mellitus with hyperglycemia                                                                           | Diagnosis | ICD-10-CM |
| E11.69   | Type 2 diabetes mellitus with other specified complication                                                            | Diagnosis | ICD-10-CM |
| E11.8    | Type 2 diabetes mellitus with unspecified complications                                                               | Diagnosis | ICD-10-CM |
| E11.9    | Type 2 diabetes mellitus without complications                                                                        | Diagnosis | ICD-10-CM |
| E13.00   | Other specified diabetes mellitus with hyperosmolarity without nonketotic hyperglycemic-hyperosmolar coma (NKHHC)     | Diagnosis | ICD-10-CM |
| E13.01   | Other specified diabetes mellitus with hyperosmolarity with coma                                                      | Diagnosis | ICD-10-CM |
| E13.10   | Other specified diabetes mellitus with ketoacidosis without coma                                                      | Diagnosis | ICD-10-CM |
| E13.11   | Other specified diabetes mellitus with ketoacidosis with coma                                                         | Diagnosis | ICD-10-CM |
| E13.21   | Other specified diabetes mellitus with diabetic nephropathy                                                           | Diagnosis | ICD-10-CM |
| E13.22   | Other specified diabetes mellitus with diabetic chronic kidney disease                                                | Diagnosis | ICD-10-CM |
| E13.29   | Other specified diabetes mellitus with other diabetic kidney complication                                             | Diagnosis | ICD-10-CM |
| E13.311  | Other specified diabetes mellitus with unspecified diabetic retinopathy with macular edema                            | Diagnosis | ICD-10-CM |
| E13.319  | Other specified diabetes mellitus with unspecified diabetic retinopathy without macular edema                         | Diagnosis | ICD-10-CM |
| E13.3211 | Other specified diabetes mellitus with mild nonproliferative diabetic retinopathy with macular edema, right eye       | Diagnosis | ICD-10-CM |
| E13.3212 | Other specified diabetes mellitus with mild nonproliferative diabetic retinopathy with macular edema, left eye        | Diagnosis | ICD-10-CM |
| E13.3213 | Other specified diabetes mellitus with mild nonproliferative diabetic retinopathy with macular edema, bilateral       | Diagnosis | ICD-10-CM |
| E13.3219 | Other specified diabetes mellitus with mild nonproliferative diabetic retinopathy with macular edema, unspecified eye | Diagnosis | ICD-10-CM |



| Code     | Description                                                                                                                  | Code      |           |
|----------|------------------------------------------------------------------------------------------------------------------------------|-----------|-----------|
|          |                                                                                                                              | Category  | Code Type |
| E13.3291 | Other specified diabetes mellitus with mild nonproliferative diabetic retinopathy without macular edema, right eye           | Diagnosis | ICD-10-CM |
| E13.3292 | Other specified diabetes mellitus with mild nonproliferative diabetic retinopathy without macular edema, left eye            | Diagnosis | ICD-10-CM |
| E13.3293 | Other specified diabetes mellitus with mild nonproliferative diabetic retinopathy without macular edema, bilateral           | Diagnosis | ICD-10-CM |
| E13.3299 | Other specified diabetes mellitus with mild nonproliferative diabetic retinopathy without macular edema, unspecified eye     | Diagnosis | ICD-10-CM |
| E13.3311 | Other specified diabetes mellitus with moderate nonproliferative diabetic retinopathy with macular edema, right eye          | Diagnosis | ICD-10-CM |
| E13.3312 | Other specified diabetes mellitus with moderate nonproliferative diabetic retinopathy with macular edema, left eye           | Diagnosis | ICD-10-CM |
| E13.3313 | Other specified diabetes mellitus with moderate nonproliferative diabetic retinopathy with macular edema, bilateral          | Diagnosis | ICD-10-CM |
| E13.3319 | Other specified diabetes mellitus with moderate nonproliferative diabetic retinopathy with macular edema, unspecified eye    | Diagnosis | ICD-10-CM |
| E13.3391 | Other specified diabetes mellitus with moderate nonproliferative diabetic retinopathy without macular edema, right eye       | Diagnosis | ICD-10-CM |
| E13.3392 | Other specified diabetes mellitus with moderate nonproliferative diabetic retinopathy without macular edema, left eye        | Diagnosis | ICD-10-CM |
| E13.3393 | Other specified diabetes mellitus with moderate nonproliferative diabetic retinopathy without macular edema, bilateral       | Diagnosis | ICD-10-CM |
| E13.3399 | Other specified diabetes mellitus with moderate nonproliferative diabetic retinopathy without macular edema, unspecified eye | Diagnosis | ICD-10-CM |
| E13.3411 | Other specified diabetes mellitus with severe nonproliferative diabetic retinopathy with macular edema, right eye            | Diagnosis | ICD-10-CM |
| E13.3412 | Other specified diabetes mellitus with severe nonproliferative diabetic retinopathy with macular edema, left eye             | Diagnosis | ICD-10-CM |
| E13.3413 | Other specified diabetes mellitus with severe nonproliferative diabetic retinopathy with macular edema, bilateral            | Diagnosis | ICD-10-CM |
| E13.3419 | Other specified diabetes mellitus with severe nonproliferative diabetic retinopathy with macular edema, unspecified eye      | Diagnosis | ICD-10-CM |
| E13.3491 | Other specified diabetes mellitus with severe nonproliferative diabetic retinopathy without macular edema, right eye         | Diagnosis | ICD-10-CM |
| E13.3492 | Other specified diabetes mellitus with severe nonproliferative diabetic retinopathy without macular edema, left eye          | Diagnosis | ICD-10-CM |
| E13.3493 | Other specified diabetes mellitus with severe nonproliferative diabetic retinopathy without macular edema, bilateral         | Diagnosis | ICD-10-CM |
| E13.3499 | Other specified diabetes mellitus with severe nonproliferative diabetic retinopathy without macular edema, unspecified eye   | Diagnosis | ICD-10-CM |
| E13.3511 | Other specified diabetes mellitus with proliferative diabetic retinopathy with macular edema, right eye                      | Diagnosis | ICD-10-CM |
| E13.3512 | Other specified diabetes mellitus with proliferative diabetic retinopathy with macular edema, left eye                       | Diagnosis | ICD-10-CM |

| Code     | Description                                                                                                                                                                | Code      |           |
|----------|----------------------------------------------------------------------------------------------------------------------------------------------------------------------------|-----------|-----------|
|          |                                                                                                                                                                            | Category  | Code Type |
| E13.3513 | Other specified diabetes mellitus with proliferative diabetic retinopathy with macular edema, bilateral                                                                    | Diagnosis | ICD-10-CM |
| E13.3519 | Other specified diabetes mellitus with proliferative diabetic retinopathy with macular edema, unspecified eye                                                              | Diagnosis | ICD-10-CM |
| E13.3521 | Other specified diabetes mellitus with proliferative diabetic retinopathy with traction retinal detachment involving the macula, right eye                                 | Diagnosis | ICD-10-CM |
| E13.3522 | Other specified diabetes mellitus with proliferative diabetic retinopathy with traction retinal detachment involving the macula, left eye                                  | Diagnosis | ICD-10-CM |
| E13.3523 | Other specified diabetes mellitus with proliferative diabetic retinopathy with traction retinal detachment involving the macula, bilateral                                 | Diagnosis | ICD-10-CM |
| E13.3529 | Other specified diabetes mellitus with proliferative diabetic retinopathy with traction retinal detachment involving the macula, unspecified eye                           | Diagnosis | ICD-10-CM |
| E13.3531 | Other specified diabetes mellitus with proliferative diabetic retinopathy with traction retinal detachment not involving the macula, right eye                             | Diagnosis | ICD-10-CM |
| E13.3532 | Other specified diabetes mellitus with proliferative diabetic retinopathy with traction retinal detachment not involving the macula, left eye                              | Diagnosis | ICD-10-CM |
| E13.3533 | Other specified diabetes mellitus with proliferative diabetic retinopathy with traction retinal detachment not involving the macula, bilateral                             | Diagnosis | ICD-10-CM |
| E13.3539 | Other specified diabetes mellitus with proliferative diabetic retinopathy with traction retinal detachment not involving the macula, unspecified eye                       | Diagnosis | ICD-10-CM |
| E13.3541 | Other specified diabetes mellitus with proliferative diabetic retinopathy with combined traction retinal detachment and rhegmatogenous retinal detachment, right eye       | Diagnosis | ICD-10-CM |
| E13.3542 | Other specified diabetes mellitus with proliferative diabetic retinopathy with combined traction retinal detachment and rhegmatogenous retinal detachment, left eye        | Diagnosis | ICD-10-CM |
| E13.3543 | Other specified diabetes mellitus with proliferative diabetic retinopathy with combined traction retinal detachment and rhegmatogenous retinal detachment, bilateral       | Diagnosis | ICD-10-CM |
| E13.3549 | Other specified diabetes mellitus with proliferative diabetic retinopathy with combined traction retinal detachment and rhegmatogenous retinal detachment, unspecified eye | Diagnosis | ICD-10-CM |
| E13.3551 | Other specified diabetes mellitus with stable proliferative diabetic retinopathy, right eye                                                                                | Diagnosis | ICD-10-CM |
| E13.3552 | Other specified diabetes mellitus with stable proliferative diabetic retinopathy, left eye                                                                                 | Diagnosis | ICD-10-CM |
| E13.3553 | Other specified diabetes mellitus with stable proliferative diabetic retinopathy, bilateral                                                                                | Diagnosis | ICD-10-CM |
| E13.3559 | Other specified diabetes mellitus with stable proliferative diabetic retinopathy, unspecified eye                                                                          | Diagnosis | ICD-10-CM |
| E13.3591 | Other specified diabetes mellitus with proliferative diabetic retinopathy without macular edema, right eye                                                                 | Diagnosis | ICD-10-CM |
| E13.3592 | Other specified diabetes mellitus with proliferative diabetic retinopathy without macular edema, left eye                                                                  | Diagnosis | ICD-10-CM |

| <b>Code</b> | <b>Description</b>                                                                                                   | <b>Code Category</b> | <b>Code Type</b> |
|-------------|----------------------------------------------------------------------------------------------------------------------|----------------------|------------------|
| E13.3593    | Other specified diabetes mellitus with proliferative diabetic retinopathy without macular edema, bilateral           | Diagnosis            | ICD-10-CM        |
| E13.3599    | Other specified diabetes mellitus with proliferative diabetic retinopathy without macular edema, unspecified eye     | Diagnosis            | ICD-10-CM        |
| E13.36      | Other specified diabetes mellitus with diabetic cataract                                                             | Diagnosis            | ICD-10-CM        |
| E13.37X1    | Other specified diabetes mellitus with diabetic macular edema, resolved following treatment, right eye               | Diagnosis            | ICD-10-CM        |
| E13.37X2    | Other specified diabetes mellitus with diabetic macular edema, resolved following treatment, left eye                | Diagnosis            | ICD-10-CM        |
| E13.37X3    | Other specified diabetes mellitus with diabetic macular edema, resolved following treatment, bilateral               | Diagnosis            | ICD-10-CM        |
| E13.37X9    | Other specified diabetes mellitus with diabetic macular edema, resolved following treatment, unspecified eye         | Diagnosis            | ICD-10-CM        |
| E13.39      | Other specified diabetes mellitus with other diabetic ophthalmic complication                                        | Diagnosis            | ICD-10-CM        |
| E13.40      | Other specified diabetes mellitus with diabetic neuropathy, unspecified                                              | Diagnosis            | ICD-10-CM        |
| E13.41      | Other specified diabetes mellitus with diabetic mononeuropathy                                                       | Diagnosis            | ICD-10-CM        |
| E13.42      | Other specified diabetes mellitus with diabetic polyneuropathy                                                       | Diagnosis            | ICD-10-CM        |
| E13.43      | Other specified diabetes mellitus with diabetic autonomic (poly)neuropathy                                           | Diagnosis            | ICD-10-CM        |
| E13.44      | Other specified diabetes mellitus with diabetic amyotrophy                                                           | Diagnosis            | ICD-10-CM        |
| E13.49      | Other specified diabetes mellitus with other diabetic neurological complication                                      | Diagnosis            | ICD-10-CM        |
| E13.51      | Other specified diabetes mellitus with diabetic peripheral angiopathy without gangrene                               | Diagnosis            | ICD-10-CM        |
| E13.52      | Other specified diabetes mellitus with diabetic peripheral angiopathy with gangrene                                  | Diagnosis            | ICD-10-CM        |
| E13.59      | Other specified diabetes mellitus with other circulatory complications                                               | Diagnosis            | ICD-10-CM        |
| E13.610     | Other specified diabetes mellitus with diabetic neuropathic arthropathy                                              | Diagnosis            | ICD-10-CM        |
| E13.618     | Other specified diabetes mellitus with other diabetic arthropathy                                                    | Diagnosis            | ICD-10-CM        |
| E13.620     | Other specified diabetes mellitus with diabetic dermatitis                                                           | Diagnosis            | ICD-10-CM        |
| E13.621     | Other specified diabetes mellitus with foot ulcer                                                                    | Diagnosis            | ICD-10-CM        |
| E13.622     | Other specified diabetes mellitus with other skin ulcer                                                              | Diagnosis            | ICD-10-CM        |
| E13.628     | Other specified diabetes mellitus with other skin complications                                                      | Diagnosis            | ICD-10-CM        |
| E13.630     | Other specified diabetes mellitus with periodontal disease                                                           | Diagnosis            | ICD-10-CM        |
| E13.638     | Other specified diabetes mellitus with other oral complications                                                      | Diagnosis            | ICD-10-CM        |
| E13.641     | Other specified diabetes mellitus with hypoglycemia with coma                                                        | Diagnosis            | ICD-10-CM        |
| E13.649     | Other specified diabetes mellitus with hypoglycemia without coma                                                     | Diagnosis            | ICD-10-CM        |
| E13.65      | Other specified diabetes mellitus with hyperglycemia                                                                 | Diagnosis            | ICD-10-CM        |
| E13.69      | Other specified diabetes mellitus with other specified complication                                                  | Diagnosis            | ICD-10-CM        |
| E13.8       | Other specified diabetes mellitus with unspecified complications                                                     | Diagnosis            | ICD-10-CM        |
| E13.9       | Other specified diabetes mellitus without complications                                                              | Diagnosis            | ICD-10-CM        |
| 648.0       | Maternal diabetes mellitus complicating pregnancy, childbirth, or the puerperium                                     | Diagnosis            | ICD-9-CM         |
| 648.00      | Maternal diabetes mellitus, complicating pregnancy, childbirth, or the puerperium, unspecified as to episode of care | Diagnosis            | ICD-9-CM         |
| 648.01      | Maternal diabetes mellitus with delivery                                                                             | Diagnosis            | ICD-9-CM         |
| 648.02      | Maternal diabetes mellitus with delivery, with current postpartum complication                                       | Diagnosis            | ICD-9-CM         |
| 648.03      | Maternal diabetes mellitus, antepartum                                                                               | Diagnosis            | ICD-9-CM         |

| <b>Code</b> | <b>Description</b>                                                                                                              | <b>Code Category</b> | <b>Code Type</b> |
|-------------|---------------------------------------------------------------------------------------------------------------------------------|----------------------|------------------|
| 648.04      | Maternal diabetes mellitus, complicating pregnancy, childbirth, or the puerperium, postpartum condition or complication         | Diagnosis            | ICD-9-CM         |
| 648.81      | Abnormal maternal glucose tolerance, with delivery                                                                              | Diagnosis            | ICD-9-CM         |
| 648.82      | Abnormal maternal glucose tolerance, with delivery, with current postpartum complication                                        | Diagnosis            | ICD-9-CM         |
| 648.83      | Abnormal maternal glucose tolerance, antepartum                                                                                 | Diagnosis            | ICD-9-CM         |
| 648.84      | Abnormal maternal glucose tolerance complicating pregnancy, childbirth, or the puerperium, postpartum condition or complication | Diagnosis            | ICD-9-CM         |
| O24319      | Unspecified pre-existing diabetes mellitus in pregnancy, unspecified trimester                                                  | Diagnosis            | ICD-10-CM        |
| O2432       | Unspecified pre-existing diabetes mellitus in childbirth                                                                        | Diagnosis            | ICD-10-CM        |
| O2492       | Unspecified diabetes mellitus in childbirth                                                                                     | Diagnosis            | ICD-10-CM        |
| O24913      | Unspecified diabetes mellitus in pregnancy, third trimester                                                                     | Diagnosis            | ICD-10-CM        |
| O24912      | Unspecified diabetes mellitus in pregnancy, second trimester                                                                    | Diagnosis            | ICD-10-CM        |
| O24911      | Unspecified diabetes mellitus in pregnancy, first trimester                                                                     | Diagnosis            | ICD-10-CM        |
| O2493       | Unspecified diabetes mellitus in the puerperium                                                                                 | Diagnosis            | ICD-10-CM        |
| O24019      | Pre-existing type 1 diabetes mellitus, in pregnancy, unspecified trimester                                                      | Diagnosis            | ICD-10-CM        |
| O24919      | Unspecified diabetes mellitus in pregnancy, unspecified trimester                                                               | Diagnosis            | ICD-10-CM        |
| O24819      | Other pre-existing diabetes mellitus in pregnancy, unspecified trimester                                                        | Diagnosis            | ICD-10-CM        |
| O24119      | Pre-existing type 2 diabetes mellitus, in pregnancy, unspecified trimester                                                      | Diagnosis            | ICD-10-CM        |
| O24011      | Pre-existing type 1 diabetes mellitus, in pregnancy, first trimester                                                            | Diagnosis            | ICD-10-CM        |
| O2482       | Other pre-existing diabetes mellitus in childbirth                                                                              | Diagnosis            | ICD-10-CM        |
| O24813      | Other pre-existing diabetes mellitus in pregnancy, third trimester                                                              | Diagnosis            | ICD-10-CM        |
| O24812      | Other pre-existing diabetes mellitus in pregnancy, second trimester                                                             | Diagnosis            | ICD-10-CM        |
| O24811      | Other pre-existing diabetes mellitus in pregnancy, first trimester                                                              | Diagnosis            | ICD-10-CM        |
| O24313      | Unspecified pre-existing diabetes mellitus in pregnancy, third trimester                                                        | Diagnosis            | ICD-10-CM        |
| O24312      | Unspecified pre-existing diabetes mellitus in pregnancy, second trimester                                                       | Diagnosis            | ICD-10-CM        |
| O24311      | Unspecified pre-existing diabetes mellitus in pregnancy, first trimester                                                        | Diagnosis            | ICD-10-CM        |
| O2412       | Pre-existing type 2 diabetes mellitus, in childbirth                                                                            | Diagnosis            | ICD-10-CM        |
| O24113      | Pre-existing type 2 diabetes mellitus, in pregnancy, third trimester                                                            | Diagnosis            | ICD-10-CM        |
| O24112      | Pre-existing type 2 diabetes mellitus, in pregnancy, second trimester                                                           | Diagnosis            | ICD-10-CM        |
| O24111      | Pre-existing type 2 diabetes mellitus, in pregnancy, first trimester                                                            | Diagnosis            | ICD-10-CM        |
| O2402       | Pre-existing type 1 diabetes mellitus, in childbirth                                                                            | Diagnosis            | ICD-10-CM        |
| O24013      | Pre-existing type 1 diabetes mellitus, in pregnancy, third trimester                                                            | Diagnosis            | ICD-10-CM        |
| O24012      | Pre-existing type 1 diabetes mellitus, in pregnancy, second trimester                                                           | Diagnosis            | ICD-10-CM        |
| O2403       | Pre-existing type 1 diabetes mellitus, in the puerperium                                                                        | Diagnosis            | ICD-10-CM        |
| O2483       | Other pre-existing diabetes mellitus in the puerperium                                                                          | Diagnosis            | ICD-10-CM        |
| O2433       | Unspecified pre-existing diabetes mellitus in the puerperium                                                                    | Diagnosis            | ICD-10-CM        |
| O2413       | Pre-existing type 2 diabetes mellitus, in the puerperium                                                                        | Diagnosis            | ICD-10-CM        |
| O24.414     | Gestational diabetes mellitus in pregnancy, insulin controlled                                                                  | Diagnosis            | ICD-10-CM        |
| O24.415     | Gestational diabetes mellitus in pregnancy, controlled by oral hypoglycemic drugs                                               | Diagnosis            | ICD-10-CM        |
| O24.419     | Gestational diabetes mellitus in pregnancy, unspecified control                                                                 | Diagnosis            | ICD-10-CM        |
| O24.425     | Gestational diabetes mellitus in childbirth, controlled by oral hypoglycemic drugs                                              | Diagnosis            | ICD-10-CM        |
| O24.429     | Gestational diabetes mellitus in childbirth, unspecified control                                                                | Diagnosis            | ICD-10-CM        |
| O24.434     | Gestational diabetes mellitus in the puerperium, insulin controlled                                                             | Diagnosis            | ICD-10-CM        |
| O24.435     | Gestational diabetes mellitus in puerperium, controlled by oral hypoglycemic drugs                                              | Diagnosis            | ICD-10-CM        |

| Code    | Description                                                                                                   | Code      |           |
|---------|---------------------------------------------------------------------------------------------------------------|-----------|-----------|
|         |                                                                                                               | Category  | Code Type |
| O24.439 | Gestational diabetes mellitus in the puerperium, unspecified control                                          | Diagnosis | ICD-10-CM |
| E08.610 | Diabetes mellitus due to underlying condition with diabetic neuropathic arthropathy                           | Diagnosis | ICD-10-CM |
| E08.618 | Diabetes mellitus due to underlying condition with other diabetic arthropathy                                 | Diagnosis | ICD-10-CM |
| E09.610 | Drug or chemical induced diabetes mellitus with diabetic neuropathic arthropathy                              | Diagnosis | ICD-10-CM |
| E09.618 | Drug or chemical induced diabetes mellitus with other diabetic arthropathy                                    | Diagnosis | ICD-10-CM |
| E10.610 | Type 1 diabetes mellitus with diabetic neuropathic arthropathy                                                | Diagnosis | ICD-10-CM |
| E10.618 | Type 1 diabetes mellitus with other diabetic arthropathy                                                      | Diagnosis | ICD-10-CM |
| E11.610 | Type 2 diabetes mellitus with diabetic neuropathic arthropathy                                                | Diagnosis | ICD-10-CM |
| E11.618 | Type 2 diabetes mellitus with other diabetic arthropathy                                                      | Diagnosis | ICD-10-CM |
| E13.610 | Other specified diabetes mellitus with diabetic neuropathic arthropathy                                       | Diagnosis | ICD-10-CM |
| E13.618 | Other specified diabetes mellitus with other diabetic arthropathy                                             | Diagnosis | ICD-10-CM |
| 249     | Secondary diabetes mellitus                                                                                   | Diagnosis | ICD-9-CM  |
| 249.0   | Secondary diabetes mellitus without mention of complication                                                   | Diagnosis | ICD-9-CM  |
| 249.00  | Secondary diabetes mellitus without mention of complication, not stated as uncontrolled, or unspecified       | Diagnosis | ICD-9-CM  |
| 249.01  | Secondary diabetes mellitus without mention of complication, uncontrolled                                     | Diagnosis | ICD-9-CM  |
| 249.1   | Secondary diabetes mellitus with ketoacidosis                                                                 | Diagnosis | ICD-9-CM  |
| 249.10  | Secondary diabetes mellitus with ketoacidosis, not stated as uncontrolled, or unspecified                     | Diagnosis | ICD-9-CM  |
| 249.11  | Secondary diabetes mellitus with ketoacidosis, uncontrolled                                                   | Diagnosis | ICD-9-CM  |
| 249.2   | Secondary diabetes mellitus with hyperosmolarity                                                              | Diagnosis | ICD-9-CM  |
| 249.20  | Secondary diabetes mellitus with hyperosmolarity, not stated as uncontrolled, or unspecified                  | Diagnosis | ICD-9-CM  |
| 249.21  | Secondary diabetes mellitus with hyperosmolarity, uncontrolled                                                | Diagnosis | ICD-9-CM  |
| 249.3   | Secondary diabetes mellitus with other coma                                                                   | Diagnosis | ICD-9-CM  |
| 249.30  | Secondary diabetes mellitus with other coma, not stated as uncontrolled, or unspecified                       | Diagnosis | ICD-9-CM  |
| 249.31  | Secondary diabetes mellitus with other coma, uncontrolled                                                     | Diagnosis | ICD-9-CM  |
| 249.4   | Secondary diabetes mellitus with renal manifestations                                                         | Diagnosis | ICD-9-CM  |
| 249.40  | Secondary diabetes mellitus with renal manifestations, not stated as uncontrolled, or unspecified             | Diagnosis | ICD-9-CM  |
| 249.41  | Secondary diabetes mellitus with renal manifestations, uncontrolled                                           | Diagnosis | ICD-9-CM  |
| 249.5   | Secondary diabetes mellitus with ophthalmic manifestations                                                    | Diagnosis | ICD-9-CM  |
| 249.50  | Secondary diabetes mellitus with ophthalmic manifestations, not stated as uncontrolled, or unspecified        | Diagnosis | ICD-9-CM  |
| 249.51  | Secondary diabetes mellitus with ophthalmic manifestations, uncontrolled                                      | Diagnosis | ICD-9-CM  |
| 249.6   | Secondary diabetes mellitus with neurological manifestations                                                  | Diagnosis | ICD-9-CM  |
| 249.60  | Secondary diabetes mellitus with neurological manifestations, not stated as uncontrolled, or unspecified      | Diagnosis | ICD-9-CM  |
| 249.61  | Secondary diabetes mellitus with neurological manifestations, uncontrolled                                    | Diagnosis | ICD-9-CM  |
| 249.7   | Secondary diabetes mellitus with peripheral circulatory disorders                                             | Diagnosis | ICD-9-CM  |
| 249.70  | Secondary diabetes mellitus with peripheral circulatory disorders, not stated as uncontrolled, or unspecified | Diagnosis | ICD-9-CM  |
| 249.71  | Secondary diabetes mellitus with peripheral circulatory disorders, uncontrolled                               | Diagnosis | ICD-9-CM  |
| 249.8   | Secondary diabetes mellitus with other specified manifestations                                               | Diagnosis | ICD-9-CM  |

| <b>Code</b> | <b>Description</b>                                                                                                                    | <b>Code Category</b> | <b>Code Type</b> |
|-------------|---------------------------------------------------------------------------------------------------------------------------------------|----------------------|------------------|
| 249.80      | Secondary diabetes mellitus with other specified manifestations, not stated as uncontrolled, or unspecified                           | Diagnosis            | ICD-9-CM         |
| 249.81      | Secondary diabetes mellitus with other specified manifestations, uncontrolled                                                         | Diagnosis            | ICD-9-CM         |
| 249.9       | Secondary diabetes mellitus with unspecified complication                                                                             | Diagnosis            | ICD-9-CM         |
| 249.90      | Secondary diabetes mellitus with unspecified complication, not stated as uncontrolled, or unspecified                                 | Diagnosis            | ICD-9-CM         |
| 249.91      | Secondary diabetes mellitus with unspecified complication, uncontrolled                                                               | Diagnosis            | ICD-9-CM         |
| 251.1       | Other specified hypoglycemia                                                                                                          | Diagnosis            | ICD-9-CM         |
| E08.00      | Diabetes mellitus due to underlying condition with hyperosmolarity without nonketotic hyperglycemic-hyperosmolar coma (NKHHC)         | Diagnosis            | ICD-10-CM        |
| E08.01      | Diabetes mellitus due to underlying condition with hyperosmolarity with coma                                                          | Diagnosis            | ICD-10-CM        |
| E08.10      | Diabetes mellitus due to underlying condition with ketoacidosis without coma                                                          | Diagnosis            | ICD-10-CM        |
| E08.11      | Diabetes mellitus due to underlying condition with ketoacidosis with coma                                                             | Diagnosis            | ICD-10-CM        |
| E08.311     | Diabetes mellitus due to underlying condition with unspecified diabetic retinopathy with macular edema                                | Diagnosis            | ICD-10-CM        |
| E08.319     | Diabetes mellitus due to underlying condition with unspecified diabetic retinopathy without macular edema                             | Diagnosis            | ICD-10-CM        |
| E08.3211    | Diabetes mellitus due to underlying condition with mild nonproliferative diabetic retinopathy with macular edema, right eye           | Diagnosis            | ICD-10-CM        |
| E08.3212    | Diabetes mellitus due to underlying condition with mild nonproliferative diabetic retinopathy with macular edema, left eye            | Diagnosis            | ICD-10-CM        |
| E08.3213    | Diabetes mellitus due to underlying condition with mild nonproliferative diabetic retinopathy with macular edema, bilateral           | Diagnosis            | ICD-10-CM        |
| E08.3219    | Diabetes mellitus due to underlying condition with mild nonproliferative diabetic retinopathy with macular edema, unspecified eye     | Diagnosis            | ICD-10-CM        |
| E08.3291    | Diabetes mellitus due to underlying condition with mild nonproliferative diabetic retinopathy without macular edema, right eye        | Diagnosis            | ICD-10-CM        |
| E08.3292    | Diabetes mellitus due to underlying condition with mild nonproliferative diabetic retinopathy without macular edema, left eye         | Diagnosis            | ICD-10-CM        |
| E08.3293    | Diabetes mellitus due to underlying condition with mild nonproliferative diabetic retinopathy without macular edema, bilateral        | Diagnosis            | ICD-10-CM        |
| E08.3299    | Diabetes mellitus due to underlying condition with mild nonproliferative diabetic retinopathy without macular edema, unspecified eye  | Diagnosis            | ICD-10-CM        |
| E08.3311    | Diabetes mellitus due to underlying condition with moderate nonproliferative diabetic retinopathy with macular edema, right eye       | Diagnosis            | ICD-10-CM        |
| E08.3312    | Diabetes mellitus due to underlying condition with moderate nonproliferative diabetic retinopathy with macular edema, left eye        | Diagnosis            | ICD-10-CM        |
| E08.3313    | Diabetes mellitus due to underlying condition with moderate nonproliferative diabetic retinopathy with macular edema, bilateral       | Diagnosis            | ICD-10-CM        |
| E08.3319    | Diabetes mellitus due to underlying condition with moderate nonproliferative diabetic retinopathy with macular edema, unspecified eye | Diagnosis            | ICD-10-CM        |
| E08.3391    | Diabetes mellitus due to underlying condition with moderate nonproliferative diabetic retinopathy without macular edema, right eye    | Diagnosis            | ICD-10-CM        |
| E08.3392    | Diabetes mellitus due to underlying condition with moderate nonproliferative diabetic retinopathy without macular edema, left eye     | Diagnosis            | ICD-10-CM        |

| Code     | Description                                                                                                                                                  | Code      |           |
|----------|--------------------------------------------------------------------------------------------------------------------------------------------------------------|-----------|-----------|
|          |                                                                                                                                                              | Category  | Code Type |
| E08.3393 | Diabetes mellitus due to underlying condition with moderate nonproliferative diabetic retinopathy without macular edema, bilateral                           | Diagnosis | ICD-10-CM |
| E08.3399 | Diabetes mellitus due to underlying condition with moderate nonproliferative diabetic retinopathy without macular edema, unspecified eye                     | Diagnosis | ICD-10-CM |
| E08.3411 | Diabetes mellitus due to underlying condition with severe nonproliferative diabetic retinopathy with macular edema, right eye                                | Diagnosis | ICD-10-CM |
| E08.3412 | Diabetes mellitus due to underlying condition with severe nonproliferative diabetic retinopathy with macular edema, left eye                                 | Diagnosis | ICD-10-CM |
| E08.3413 | Diabetes mellitus due to underlying condition with severe nonproliferative diabetic retinopathy with macular edema, bilateral                                | Diagnosis | ICD-10-CM |
| E08.3419 | Diabetes mellitus due to underlying condition with severe nonproliferative diabetic retinopathy with macular edema, unspecified eye                          | Diagnosis | ICD-10-CM |
| E08.3491 | Diabetes mellitus due to underlying condition with severe nonproliferative diabetic retinopathy without macular edema, right eye                             | Diagnosis | ICD-10-CM |
| E08.3492 | Diabetes mellitus due to underlying condition with severe nonproliferative diabetic retinopathy without macular edema, left eye                              | Diagnosis | ICD-10-CM |
| E08.3493 | Diabetes mellitus due to underlying condition with severe nonproliferative diabetic retinopathy without macular edema, bilateral                             | Diagnosis | ICD-10-CM |
| E08.3499 | Diabetes mellitus due to underlying condition with severe nonproliferative diabetic retinopathy without macular edema, unspecified eye                       | Diagnosis | ICD-10-CM |
| E08.3511 | Diabetes mellitus due to underlying condition with proliferative diabetic retinopathy with macular edema, right eye                                          | Diagnosis | ICD-10-CM |
| E08.3512 | Diabetes mellitus due to underlying condition with proliferative diabetic retinopathy with macular edema, left eye                                           | Diagnosis | ICD-10-CM |
| E08.3513 | Diabetes mellitus due to underlying condition with proliferative diabetic retinopathy with macular edema, bilateral                                          | Diagnosis | ICD-10-CM |
| E08.3519 | Diabetes mellitus due to underlying condition with proliferative diabetic retinopathy with macular edema, unspecified eye                                    | Diagnosis | ICD-10-CM |
| E08.3521 | Diabetes mellitus due to underlying condition with proliferative diabetic retinopathy with traction retinal detachment involving the macula, right eye       | Diagnosis | ICD-10-CM |
| E08.3522 | Diabetes mellitus due to underlying condition with proliferative diabetic retinopathy with traction retinal detachment involving the macula, left eye        | Diagnosis | ICD-10-CM |
| E08.3523 | Diabetes mellitus due to underlying condition with proliferative diabetic retinopathy with traction retinal detachment involving the macula, bilateral       | Diagnosis | ICD-10-CM |
| E08.3529 | Diabetes mellitus due to underlying condition with proliferative diabetic retinopathy with traction retinal detachment involving the macula, unspecified eye | Diagnosis | ICD-10-CM |
| E08.3531 | Diabetes mellitus due to underlying condition with proliferative diabetic retinopathy with traction retinal detachment not involving the macula, right eye   | Diagnosis | ICD-10-CM |
| E08.3532 | Diabetes mellitus due to underlying condition with proliferative diabetic retinopathy with traction retinal detachment not involving the macula, left eye    | Diagnosis | ICD-10-CM |
| E08.3533 | Diabetes mellitus due to underlying condition with proliferative diabetic retinopathy with traction retinal detachment not involving the macula, bilateral   | Diagnosis | ICD-10-CM |

| Code     | Description                                                                                                                                                                            | Code      |           |
|----------|----------------------------------------------------------------------------------------------------------------------------------------------------------------------------------------|-----------|-----------|
|          |                                                                                                                                                                                        | Category  | Code Type |
| E08.3539 | Diabetes mellitus due to underlying condition with proliferative diabetic retinopathy with traction retinal detachment not involving the macula, unspecified eye                       | Diagnosis | ICD-10-CM |
| E08.3541 | Diabetes mellitus due to underlying condition with proliferative diabetic retinopathy with combined traction retinal detachment and rhegmatogenous retinal detachment, right eye       | Diagnosis | ICD-10-CM |
| E08.3542 | Diabetes mellitus due to underlying condition with proliferative diabetic retinopathy with combined traction retinal detachment and rhegmatogenous retinal detachment, left eye        | Diagnosis | ICD-10-CM |
| E08.3543 | Diabetes mellitus due to underlying condition with proliferative diabetic retinopathy with combined traction retinal detachment and rhegmatogenous retinal detachment, bilateral       | Diagnosis | ICD-10-CM |
| E08.3549 | Diabetes mellitus due to underlying condition with proliferative diabetic retinopathy with combined traction retinal detachment and rhegmatogenous retinal detachment, unspecified eye | Diagnosis | ICD-10-CM |
| E08.3551 | Diabetes mellitus due to underlying condition with stable proliferative diabetic retinopathy, right eye                                                                                | Diagnosis | ICD-10-CM |
| E08.3552 | Diabetes mellitus due to underlying condition with stable proliferative diabetic retinopathy, left eye                                                                                 | Diagnosis | ICD-10-CM |
| E08.3553 | Diabetes mellitus due to underlying condition with stable proliferative diabetic retinopathy, bilateral                                                                                | Diagnosis | ICD-10-CM |
| E08.3559 | Diabetes mellitus due to underlying condition with stable proliferative diabetic retinopathy, unspecified eye                                                                          | Diagnosis | ICD-10-CM |
| E08.3591 | Diabetes mellitus due to underlying condition with proliferative diabetic retinopathy without macular edema, right eye                                                                 | Diagnosis | ICD-10-CM |
| E08.3592 | Diabetes mellitus due to underlying condition with proliferative diabetic retinopathy without macular edema, left eye                                                                  | Diagnosis | ICD-10-CM |
| E08.3593 | Diabetes mellitus due to underlying condition with proliferative diabetic retinopathy without macular edema, bilateral                                                                 | Diagnosis | ICD-10-CM |
| E08.3599 | Diabetes mellitus due to underlying condition with proliferative diabetic retinopathy without macular edema, unspecified eye                                                           | Diagnosis | ICD-10-CM |
| E08.36   | Diabetes mellitus due to underlying condition with diabetic cataract                                                                                                                   | Diagnosis | ICD-10-CM |
| E08.37X1 | Diabetes mellitus due to underlying condition with diabetic macular edema, resolved following treatment, right eye                                                                     | Diagnosis | ICD-10-CM |
| E08.37X2 | Diabetes mellitus due to underlying condition with diabetic macular edema, resolved following treatment, left eye                                                                      | Diagnosis | ICD-10-CM |
| E08.37X3 | Diabetes mellitus due to underlying condition with diabetic macular edema, resolved following treatment, bilateral                                                                     | Diagnosis | ICD-10-CM |
| E08.37X9 | Diabetes mellitus due to underlying condition with diabetic macular edema, resolved following treatment, unspecified eye                                                               | Diagnosis | ICD-10-CM |
| E08.39   | Diabetes mellitus due to underlying condition with other diabetic ophthalmic complication                                                                                              | Diagnosis | ICD-10-CM |
| E08.40   | Diabetes mellitus due to underlying condition with diabetic neuropathy, unspecified                                                                                                    | Diagnosis | ICD-10-CM |
| E08.41   | Diabetes mellitus due to underlying condition with diabetic mononeuropathy                                                                                                             | Diagnosis | ICD-10-CM |



| Code     | Description                                                                                                                | Code      |           |
|----------|----------------------------------------------------------------------------------------------------------------------------|-----------|-----------|
|          |                                                                                                                            | Category  | Code Type |
| E08.42   | Diabetes mellitus due to underlying condition with diabetic polyneuropathy                                                 | Diagnosis | ICD-10-CM |
| E08.43   | Diabetes mellitus due to underlying condition with diabetic autonomic (poly)neuropathy                                     | Diagnosis | ICD-10-CM |
| E08.44   | Diabetes mellitus due to underlying condition with diabetic amyotrophy                                                     | Diagnosis | ICD-10-CM |
| E08.49   | Diabetes mellitus due to underlying condition with other diabetic neurological complication                                | Diagnosis | ICD-10-CM |
| E08.51   | Diabetes mellitus due to underlying condition with diabetic peripheral angiopathy without gangrene                         | Diagnosis | ICD-10-CM |
| E08.52   | Diabetes mellitus due to underlying condition with diabetic peripheral angiopathy with gangrene                            | Diagnosis | ICD-10-CM |
| E08.59   | Diabetes mellitus due to underlying condition with other circulatory complications                                         | Diagnosis | ICD-10-CM |
| E08.610  | Diabetes mellitus due to underlying condition with diabetic neuropathic arthropathy                                        | Diagnosis | ICD-10-CM |
| E08.618  | Diabetes mellitus due to underlying condition with other diabetic arthropathy                                              | Diagnosis | ICD-10-CM |
| E08.620  | Diabetes mellitus due to underlying condition with diabetic dermatitis                                                     | Diagnosis | ICD-10-CM |
| E08.621  | Diabetes mellitus due to underlying condition with foot ulcer                                                              | Diagnosis | ICD-10-CM |
| E08.622  | Diabetes mellitus due to underlying condition with other skin ulcer                                                        | Diagnosis | ICD-10-CM |
| E08.628  | Diabetes mellitus due to underlying condition with other skin complications                                                | Diagnosis | ICD-10-CM |
| E08.630  | Diabetes mellitus due to underlying condition with periodontal disease                                                     | Diagnosis | ICD-10-CM |
| E08.638  | Diabetes mellitus due to underlying condition with other oral complications                                                | Diagnosis | ICD-10-CM |
| E08.641  | Diabetes mellitus due to underlying condition with hypoglycemia with coma                                                  | Diagnosis | ICD-10-CM |
| E08.649  | Diabetes mellitus due to underlying condition with hypoglycemia without coma                                               | Diagnosis | ICD-10-CM |
| E08.65   | Diabetes mellitus due to underlying condition with hyperglycemia                                                           | Diagnosis | ICD-10-CM |
| E08.69   | Diabetes mellitus due to underlying condition with other specified complication                                            | Diagnosis | ICD-10-CM |
| E08.8    | Diabetes mellitus due to underlying condition with unspecified complications                                               | Diagnosis | ICD-10-CM |
| E08.9    | Diabetes mellitus due to underlying condition without complications                                                        | Diagnosis | ICD-10-CM |
| E09.00   | Drug or chemical induced diabetes mellitus with hyperosmolarity without nonketotic hyperglycemic-hyperosmolar coma (NKHHC) | Diagnosis | ICD-10-CM |
| E09.01   | Drug or chemical induced diabetes mellitus with hyperosmolarity with coma                                                  | Diagnosis | ICD-10-CM |
| E09.10   | Drug or chemical induced diabetes mellitus with ketoacidosis without coma                                                  | Diagnosis | ICD-10-CM |
| E09.11   | Drug or chemical induced diabetes mellitus with ketoacidosis with coma                                                     | Diagnosis | ICD-10-CM |
| E09.21   | Drug or chemical induced diabetes mellitus with diabetic nephropathy                                                       | Diagnosis | ICD-10-CM |
| E09.22   | Drug or chemical induced diabetes mellitus with diabetic chronic kidney disease                                            | Diagnosis | ICD-10-CM |
| E09.29   | Drug or chemical induced diabetes mellitus with other diabetic kidney complication                                         | Diagnosis | ICD-10-CM |
| E09.311  | Drug or chemical induced diabetes mellitus with unspecified diabetic retinopathy with macular edema                        | Diagnosis | ICD-10-CM |
| E09.319  | Drug or chemical induced diabetes mellitus with unspecified diabetic retinopathy without macular edema                     | Diagnosis | ICD-10-CM |
| E09.3211 | Drug or chemical induced diabetes mellitus with mild nonproliferative diabetic retinopathy with macular edema, right eye   | Diagnosis | ICD-10-CM |
| E09.3212 | Drug or chemical induced diabetes mellitus with mild nonproliferative diabetic retinopathy with macular edema, left eye    | Diagnosis | ICD-10-CM |
| E09.3213 | Drug or chemical induced diabetes mellitus with mild nonproliferative diabetic retinopathy with macular edema, bilateral   | Diagnosis | ICD-10-CM |

| Code     | Description                                                                                                                           | Code      |           |
|----------|---------------------------------------------------------------------------------------------------------------------------------------|-----------|-----------|
|          |                                                                                                                                       | Category  | Code Type |
| E09.3219 | Drug or chemical induced diabetes mellitus with mild nonproliferative diabetic retinopathy with macular edema, unspecified eye        | Diagnosis | ICD-10-CM |
| E09.3291 | Drug or chemical induced diabetes mellitus with mild nonproliferative diabetic retinopathy without macular edema, right eye           | Diagnosis | ICD-10-CM |
| E09.3292 | Drug or chemical induced diabetes mellitus with mild nonproliferative diabetic retinopathy without macular edema, left eye            | Diagnosis | ICD-10-CM |
| E09.3293 | Drug or chemical induced diabetes mellitus with mild nonproliferative diabetic retinopathy without macular edema, bilateral           | Diagnosis | ICD-10-CM |
| E09.3299 | Drug or chemical induced diabetes mellitus with mild nonproliferative diabetic retinopathy without macular edema, unspecified eye     | Diagnosis | ICD-10-CM |
| E09.3311 | Drug or chemical induced diabetes mellitus with moderate nonproliferative diabetic retinopathy with macular edema, right eye          | Diagnosis | ICD-10-CM |
| E09.3312 | Drug or chemical induced diabetes mellitus with moderate nonproliferative diabetic retinopathy with macular edema, left eye           | Diagnosis | ICD-10-CM |
| E09.3313 | Drug or chemical induced diabetes mellitus with moderate nonproliferative diabetic retinopathy with macular edema, bilateral          | Diagnosis | ICD-10-CM |
| E09.3319 | Drug or chemical induced diabetes mellitus with moderate nonproliferative diabetic retinopathy with macular edema, unspecified eye    | Diagnosis | ICD-10-CM |
| E09.3391 | Drug or chemical induced diabetes mellitus with moderate nonproliferative diabetic retinopathy without macular edema, right eye       | Diagnosis | ICD-10-CM |
| E09.3392 | Drug or chemical induced diabetes mellitus with moderate nonproliferative diabetic retinopathy without macular edema, left eye        | Diagnosis | ICD-10-CM |
| E09.3393 | Drug or chemical induced diabetes mellitus with moderate nonproliferative diabetic retinopathy without macular edema, bilateral       | Diagnosis | ICD-10-CM |
| E09.3399 | Drug or chemical induced diabetes mellitus with moderate nonproliferative diabetic retinopathy without macular edema, unspecified eye | Diagnosis | ICD-10-CM |
| E09.3411 | Drug or chemical induced diabetes mellitus with severe nonproliferative diabetic retinopathy with macular edema, right eye            | Diagnosis | ICD-10-CM |
| E09.3412 | Drug or chemical induced diabetes mellitus with severe nonproliferative diabetic retinopathy with macular edema, left eye             | Diagnosis | ICD-10-CM |
| E09.3413 | Drug or chemical induced diabetes mellitus with severe nonproliferative diabetic retinopathy with macular edema, bilateral            | Diagnosis | ICD-10-CM |
| E09.3419 | Drug or chemical induced diabetes mellitus with severe nonproliferative diabetic retinopathy with macular edema, unspecified eye      | Diagnosis | ICD-10-CM |
| E09.3491 | Drug or chemical induced diabetes mellitus with severe nonproliferative diabetic retinopathy without macular edema, right eye         | Diagnosis | ICD-10-CM |
| E09.3492 | Drug or chemical induced diabetes mellitus with severe nonproliferative diabetic retinopathy without macular edema, left eye          | Diagnosis | ICD-10-CM |
| E09.3493 | Drug or chemical induced diabetes mellitus with severe nonproliferative diabetic retinopathy without macular edema, bilateral         | Diagnosis | ICD-10-CM |
| E09.3499 | Drug or chemical induced diabetes mellitus with severe nonproliferative diabetic retinopathy without macular edema, unspecified eye   | Diagnosis | ICD-10-CM |
| E09.3511 | Drug or chemical induced diabetes mellitus with proliferative diabetic retinopathy with macular edema, right eye                      | Diagnosis | ICD-10-CM |

| Code     | Description                                                                                                                                                                         | Code      |           |
|----------|-------------------------------------------------------------------------------------------------------------------------------------------------------------------------------------|-----------|-----------|
|          |                                                                                                                                                                                     | Category  | Code Type |
| E09.3512 | Drug or chemical induced diabetes mellitus with proliferative diabetic retinopathy with macular edema, left eye                                                                     | Diagnosis | ICD-10-CM |
| E09.3513 | Drug or chemical induced diabetes mellitus with proliferative diabetic retinopathy with macular edema, bilateral                                                                    | Diagnosis | ICD-10-CM |
| E09.3519 | Drug or chemical induced diabetes mellitus with proliferative diabetic retinopathy with macular edema, unspecified eye                                                              | Diagnosis | ICD-10-CM |
| E09.3521 | Drug or chemical induced diabetes mellitus with proliferative diabetic retinopathy with traction retinal detachment involving the macula, right eye                                 | Diagnosis | ICD-10-CM |
| E09.3522 | Drug or chemical induced diabetes mellitus with proliferative diabetic retinopathy with traction retinal detachment involving the macula, left eye                                  | Diagnosis | ICD-10-CM |
| E09.3523 | Drug or chemical induced diabetes mellitus with proliferative diabetic retinopathy with traction retinal detachment involving the macula, bilateral                                 | Diagnosis | ICD-10-CM |
| E09.3529 | Drug or chemical induced diabetes mellitus with proliferative diabetic retinopathy with traction retinal detachment involving the macula, unspecified eye                           | Diagnosis | ICD-10-CM |
| E09.3531 | Drug or chemical induced diabetes mellitus with proliferative diabetic retinopathy with traction retinal detachment not involving the macula, right eye                             | Diagnosis | ICD-10-CM |
| E09.3532 | Drug or chemical induced diabetes mellitus with proliferative diabetic retinopathy with traction retinal detachment not involving the macula, left eye                              | Diagnosis | ICD-10-CM |
| E09.3533 | Drug or chemical induced diabetes mellitus with proliferative diabetic retinopathy with traction retinal detachment not involving the macula, bilateral                             | Diagnosis | ICD-10-CM |
| E09.3539 | Drug or chemical induced diabetes mellitus with proliferative diabetic retinopathy with traction retinal detachment not involving the macula, unspecified eye                       | Diagnosis | ICD-10-CM |
| E09.3541 | Drug or chemical induced diabetes mellitus with proliferative diabetic retinopathy with combined traction retinal detachment and rhegmatogenous retinal detachment, right eye       | Diagnosis | ICD-10-CM |
| E09.3542 | Drug or chemical induced diabetes mellitus with proliferative diabetic retinopathy with combined traction retinal detachment and rhegmatogenous retinal detachment, left eye        | Diagnosis | ICD-10-CM |
| E09.3543 | Drug or chemical induced diabetes mellitus with proliferative diabetic retinopathy with combined traction retinal detachment and rhegmatogenous retinal detachment, bilateral       | Diagnosis | ICD-10-CM |
| E09.3549 | Drug or chemical induced diabetes mellitus with proliferative diabetic retinopathy with combined traction retinal detachment and rhegmatogenous retinal detachment, unspecified eye | Diagnosis | ICD-10-CM |
| E09.3551 | Drug or chemical induced diabetes mellitus with stable proliferative diabetic retinopathy, right eye                                                                                | Diagnosis | ICD-10-CM |
| E09.3552 | Drug or chemical induced diabetes mellitus with stable proliferative diabetic retinopathy, left eye                                                                                 | Diagnosis | ICD-10-CM |
| E09.3553 | Drug or chemical induced diabetes mellitus with stable proliferative diabetic retinopathy, bilateral                                                                                | Diagnosis | ICD-10-CM |
| E09.3559 | Drug or chemical induced diabetes mellitus with stable proliferative diabetic retinopathy, unspecified eye                                                                          | Diagnosis | ICD-10-CM |
| E09.3591 | Drug or chemical induced diabetes mellitus with proliferative diabetic retinopathy without macular edema, right eye                                                                 | Diagnosis | ICD-10-CM |

| Code     | Description                                                                                                               | Code      |           |
|----------|---------------------------------------------------------------------------------------------------------------------------|-----------|-----------|
|          |                                                                                                                           | Category  | Code Type |
| E09.3592 | Drug or chemical induced diabetes mellitus with proliferative diabetic retinopathy without macular edema, left eye        | Diagnosis | ICD-10-CM |
| E09.3593 | Drug or chemical induced diabetes mellitus with proliferative diabetic retinopathy without macular edema, bilateral       | Diagnosis | ICD-10-CM |
| E09.3599 | Drug or chemical induced diabetes mellitus with proliferative diabetic retinopathy without macular edema, unspecified eye | Diagnosis | ICD-10-CM |
| E09.36   | Drug or chemical induced diabetes mellitus with diabetic cataract                                                         | Diagnosis | ICD-10-CM |
| E09.37X1 | Drug or chemical induced diabetes mellitus with diabetic macular edema, resolved following treatment, right eye           | Diagnosis | ICD-10-CM |
| E09.37X2 | Drug or chemical induced diabetes mellitus with diabetic macular edema, resolved following treatment, left eye            | Diagnosis | ICD-10-CM |
| E09.37X3 | Drug or chemical induced diabetes mellitus with diabetic macular edema, resolved following treatment, bilateral           | Diagnosis | ICD-10-CM |
| E09.37X9 | Drug or chemical induced diabetes mellitus with diabetic macular edema, resolved following treatment, unspecified eye     | Diagnosis | ICD-10-CM |
| E09.39   | Drug or chemical induced diabetes mellitus with other diabetic ophthalmic complication                                    | Diagnosis | ICD-10-CM |
| E09.40   | Drug or chemical induced diabetes mellitus with neurological complications with diabetic neuropathy, unspecified          | Diagnosis | ICD-10-CM |
| E09.41   | Drug or chemical induced diabetes mellitus with neurological complications with diabetic mononeuropathy                   | Diagnosis | ICD-10-CM |
| E09.42   | Drug or chemical induced diabetes mellitus with neurological complications with diabetic polyneuropathy                   | Diagnosis | ICD-10-CM |
| E09.43   | Drug or chemical induced diabetes mellitus with neurological complications with diabetic autonomic (poly)neuropathy       | Diagnosis | ICD-10-CM |
| E09.44   | Drug or chemical induced diabetes mellitus with neurological complications with diabetic amyotrophy                       | Diagnosis | ICD-10-CM |
| E09.49   | Drug or chemical induced diabetes mellitus with neurological complications with other diabetic neurological complication  | Diagnosis | ICD-10-CM |
| E09.51   | Drug or chemical induced diabetes mellitus with diabetic peripheral angiopathy without gangrene                           | Diagnosis | ICD-10-CM |
| E09.52   | Drug or chemical induced diabetes mellitus with diabetic peripheral angiopathy with gangrene                              | Diagnosis | ICD-10-CM |
| E09.59   | Drug or chemical induced diabetes mellitus with other circulatory complications                                           | Diagnosis | ICD-10-CM |
| E09.610  | Drug or chemical induced diabetes mellitus with diabetic neuropathic arthropathy                                          | Diagnosis | ICD-10-CM |
| E09.618  | Drug or chemical induced diabetes mellitus with other diabetic arthropathy                                                | Diagnosis | ICD-10-CM |
| E09.620  | Drug or chemical induced diabetes mellitus with diabetic dermatitis                                                       | Diagnosis | ICD-10-CM |
| E09.621  | Drug or chemical induced diabetes mellitus with foot ulcer                                                                | Diagnosis | ICD-10-CM |
| E09.622  | Drug or chemical induced diabetes mellitus with other skin ulcer                                                          | Diagnosis | ICD-10-CM |
| E09.628  | Drug or chemical induced diabetes mellitus with other skin complications                                                  | Diagnosis | ICD-10-CM |
| E09.630  | Drug or chemical induced diabetes mellitus with periodontal disease                                                       | Diagnosis | ICD-10-CM |
| E09.638  | Drug or chemical induced diabetes mellitus with other oral complications                                                  | Diagnosis | ICD-10-CM |
| E09.641  | Drug or chemical induced diabetes mellitus with hypoglycemia with coma                                                    | Diagnosis | ICD-10-CM |
| E09.649  | Drug or chemical induced diabetes mellitus with hypoglycemia without coma                                                 | Diagnosis | ICD-10-CM |
| E09.65   | Drug or chemical induced diabetes mellitus with hyperglycemia                                                             | Diagnosis | ICD-10-CM |

| Code     | Description                                                                                                                  | Code      |           |
|----------|------------------------------------------------------------------------------------------------------------------------------|-----------|-----------|
|          |                                                                                                                              | Category  | Code Type |
| E09.69   | Drug or chemical induced diabetes mellitus with other specified complication                                                 | Diagnosis | ICD-10-CM |
| E09.8    | Drug or chemical induced diabetes mellitus with unspecified complications                                                    | Diagnosis | ICD-10-CM |
| E09.9    | Drug or chemical induced diabetes mellitus without complications                                                             | Diagnosis | ICD-10-CM |
| E13.00   | Other specified diabetes mellitus with hyperosmolarity without nonketotic hyperglycemic-hyperosmolar coma (NKHHC)            | Diagnosis | ICD-10-CM |
| E13.01   | Other specified diabetes mellitus with hyperosmolarity with coma                                                             | Diagnosis | ICD-10-CM |
| E13.10   | Other specified diabetes mellitus with ketoacidosis without coma                                                             | Diagnosis | ICD-10-CM |
| E13.11   | Other specified diabetes mellitus with ketoacidosis with coma                                                                | Diagnosis | ICD-10-CM |
| E13.311  | Other specified diabetes mellitus with unspecified diabetic retinopathy with macular edema                                   | Diagnosis | ICD-10-CM |
| E13.319  | Other specified diabetes mellitus with unspecified diabetic retinopathy without macular edema                                | Diagnosis | ICD-10-CM |
| E13.3211 | Other specified diabetes mellitus with mild nonproliferative diabetic retinopathy with macular edema, right eye              | Diagnosis | ICD-10-CM |
| E13.3212 | Other specified diabetes mellitus with mild nonproliferative diabetic retinopathy with macular edema, left eye               | Diagnosis | ICD-10-CM |
| E13.3213 | Other specified diabetes mellitus with mild nonproliferative diabetic retinopathy with macular edema, bilateral              | Diagnosis | ICD-10-CM |
| E13.3219 | Other specified diabetes mellitus with mild nonproliferative diabetic retinopathy with macular edema, unspecified eye        | Diagnosis | ICD-10-CM |
| E13.3291 | Other specified diabetes mellitus with mild nonproliferative diabetic retinopathy without macular edema, right eye           | Diagnosis | ICD-10-CM |
| E13.3292 | Other specified diabetes mellitus with mild nonproliferative diabetic retinopathy without macular edema, left eye            | Diagnosis | ICD-10-CM |
| E13.3293 | Other specified diabetes mellitus with mild nonproliferative diabetic retinopathy without macular edema, bilateral           | Diagnosis | ICD-10-CM |
| E13.3299 | Other specified diabetes mellitus with mild nonproliferative diabetic retinopathy without macular edema, unspecified eye     | Diagnosis | ICD-10-CM |
| E13.3311 | Other specified diabetes mellitus with moderate nonproliferative diabetic retinopathy with macular edema, right eye          | Diagnosis | ICD-10-CM |
| E13.3312 | Other specified diabetes mellitus with moderate nonproliferative diabetic retinopathy with macular edema, left eye           | Diagnosis | ICD-10-CM |
| E13.3313 | Other specified diabetes mellitus with moderate nonproliferative diabetic retinopathy with macular edema, bilateral          | Diagnosis | ICD-10-CM |
| E13.3319 | Other specified diabetes mellitus with moderate nonproliferative diabetic retinopathy with macular edema, unspecified eye    | Diagnosis | ICD-10-CM |
| E13.3391 | Other specified diabetes mellitus with moderate nonproliferative diabetic retinopathy without macular edema, right eye       | Diagnosis | ICD-10-CM |
| E13.3392 | Other specified diabetes mellitus with moderate nonproliferative diabetic retinopathy without macular edema, left eye        | Diagnosis | ICD-10-CM |
| E13.3393 | Other specified diabetes mellitus with moderate nonproliferative diabetic retinopathy without macular edema, bilateral       | Diagnosis | ICD-10-CM |
| E13.3399 | Other specified diabetes mellitus with moderate nonproliferative diabetic retinopathy without macular edema, unspecified eye | Diagnosis | ICD-10-CM |

| Code     | Description                                                                                                                                                          | Code      |           |
|----------|----------------------------------------------------------------------------------------------------------------------------------------------------------------------|-----------|-----------|
|          |                                                                                                                                                                      | Category  | Code Type |
| E13.3411 | Other specified diabetes mellitus with severe nonproliferative diabetic retinopathy with macular edema, right eye                                                    | Diagnosis | ICD-10-CM |
| E13.3412 | Other specified diabetes mellitus with severe nonproliferative diabetic retinopathy with macular edema, left eye                                                     | Diagnosis | ICD-10-CM |
| E13.3413 | Other specified diabetes mellitus with severe nonproliferative diabetic retinopathy with macular edema, bilateral                                                    | Diagnosis | ICD-10-CM |
| E13.3419 | Other specified diabetes mellitus with severe nonproliferative diabetic retinopathy with macular edema, unspecified eye                                              | Diagnosis | ICD-10-CM |
| E13.3491 | Other specified diabetes mellitus with severe nonproliferative diabetic retinopathy without macular edema, right eye                                                 | Diagnosis | ICD-10-CM |
| E13.3492 | Other specified diabetes mellitus with severe nonproliferative diabetic retinopathy without macular edema, left eye                                                  | Diagnosis | ICD-10-CM |
| E13.3493 | Other specified diabetes mellitus with severe nonproliferative diabetic retinopathy without macular edema, bilateral                                                 | Diagnosis | ICD-10-CM |
| E13.3499 | Other specified diabetes mellitus with severe nonproliferative diabetic retinopathy without macular edema, unspecified eye                                           | Diagnosis | ICD-10-CM |
| E13.3511 | Other specified diabetes mellitus with proliferative diabetic retinopathy with macular edema, right eye                                                              | Diagnosis | ICD-10-CM |
| E13.3512 | Other specified diabetes mellitus with proliferative diabetic retinopathy with macular edema, left eye                                                               | Diagnosis | ICD-10-CM |
| E13.3513 | Other specified diabetes mellitus with proliferative diabetic retinopathy with macular edema, bilateral                                                              | Diagnosis | ICD-10-CM |
| E13.3519 | Other specified diabetes mellitus with proliferative diabetic retinopathy with macular edema, unspecified eye                                                        | Diagnosis | ICD-10-CM |
| E13.3521 | Other specified diabetes mellitus with proliferative diabetic retinopathy with traction retinal detachment involving the macula, right eye                           | Diagnosis | ICD-10-CM |
| E13.3522 | Other specified diabetes mellitus with proliferative diabetic retinopathy with traction retinal detachment involving the macula, left eye                            | Diagnosis | ICD-10-CM |
| E13.3523 | Other specified diabetes mellitus with proliferative diabetic retinopathy with traction retinal detachment involving the macula, bilateral                           | Diagnosis | ICD-10-CM |
| E13.3529 | Other specified diabetes mellitus with proliferative diabetic retinopathy with traction retinal detachment involving the macula, unspecified eye                     | Diagnosis | ICD-10-CM |
| E13.3531 | Other specified diabetes mellitus with proliferative diabetic retinopathy with traction retinal detachment not involving the macula, right eye                       | Diagnosis | ICD-10-CM |
| E13.3532 | Other specified diabetes mellitus with proliferative diabetic retinopathy with traction retinal detachment not involving the macula, left eye                        | Diagnosis | ICD-10-CM |
| E13.3533 | Other specified diabetes mellitus with proliferative diabetic retinopathy with traction retinal detachment not involving the macula, bilateral                       | Diagnosis | ICD-10-CM |
| E13.3539 | Other specified diabetes mellitus with proliferative diabetic retinopathy with traction retinal detachment not involving the macula, unspecified eye                 | Diagnosis | ICD-10-CM |
| E13.3541 | Other specified diabetes mellitus with proliferative diabetic retinopathy with combined traction retinal detachment and rhegmatogenous retinal detachment, right eye | Diagnosis | ICD-10-CM |

| <b>Code</b> | <b>Description</b>                                                                                                                                                         | <b>Code Category</b> | <b>Code Type</b> |
|-------------|----------------------------------------------------------------------------------------------------------------------------------------------------------------------------|----------------------|------------------|
| E13.3542    | Other specified diabetes mellitus with proliferative diabetic retinopathy with combined traction retinal detachment and rhegmatogenous retinal detachment, left eye        | Diagnosis            | ICD-10-CM        |
| E13.3543    | Other specified diabetes mellitus with proliferative diabetic retinopathy with combined traction retinal detachment and rhegmatogenous retinal detachment, bilateral       | Diagnosis            | ICD-10-CM        |
| E13.3549    | Other specified diabetes mellitus with proliferative diabetic retinopathy with combined traction retinal detachment and rhegmatogenous retinal detachment, unspecified eye | Diagnosis            | ICD-10-CM        |
| E13.3551    | Other specified diabetes mellitus with stable proliferative diabetic retinopathy, right eye                                                                                | Diagnosis            | ICD-10-CM        |
| E13.3552    | Other specified diabetes mellitus with stable proliferative diabetic retinopathy, left eye                                                                                 | Diagnosis            | ICD-10-CM        |
| E13.3553    | Other specified diabetes mellitus with stable proliferative diabetic retinopathy, bilateral                                                                                | Diagnosis            | ICD-10-CM        |
| E13.3559    | Other specified diabetes mellitus with stable proliferative diabetic retinopathy, unspecified eye                                                                          | Diagnosis            | ICD-10-CM        |
| E13.3591    | Other specified diabetes mellitus with proliferative diabetic retinopathy without macular edema, right eye                                                                 | Diagnosis            | ICD-10-CM        |
| E13.3592    | Other specified diabetes mellitus with proliferative diabetic retinopathy without macular edema, left eye                                                                  | Diagnosis            | ICD-10-CM        |
| E13.3593    | Other specified diabetes mellitus with proliferative diabetic retinopathy without macular edema, bilateral                                                                 | Diagnosis            | ICD-10-CM        |
| E13.3599    | Other specified diabetes mellitus with proliferative diabetic retinopathy without macular edema, unspecified eye                                                           | Diagnosis            | ICD-10-CM        |
| E13.36      | Other specified diabetes mellitus with diabetic cataract                                                                                                                   | Diagnosis            | ICD-10-CM        |
| E13.37X1    | Other specified diabetes mellitus with diabetic macular edema, resolved following treatment, right eye                                                                     | Diagnosis            | ICD-10-CM        |
| E13.37X2    | Other specified diabetes mellitus with diabetic macular edema, resolved following treatment, left eye                                                                      | Diagnosis            | ICD-10-CM        |
| E13.37X3    | Other specified diabetes mellitus with diabetic macular edema, resolved following treatment, bilateral                                                                     | Diagnosis            | ICD-10-CM        |
| E13.37X9    | Other specified diabetes mellitus with diabetic macular edema, resolved following treatment, unspecified eye                                                               | Diagnosis            | ICD-10-CM        |
| E13.39      | Other specified diabetes mellitus with other diabetic ophthalmic complication                                                                                              | Diagnosis            | ICD-10-CM        |
| E13.618     | Other specified diabetes mellitus with other diabetic arthropathy                                                                                                          | Diagnosis            | ICD-10-CM        |
| E13.620     | Other specified diabetes mellitus with diabetic dermatitis                                                                                                                 | Diagnosis            | ICD-10-CM        |
| E13.621     | Other specified diabetes mellitus with foot ulcer                                                                                                                          | Diagnosis            | ICD-10-CM        |
| E13.622     | Other specified diabetes mellitus with other skin ulcer                                                                                                                    | Diagnosis            | ICD-10-CM        |
| E13.628     | Other specified diabetes mellitus with other skin complications                                                                                                            | Diagnosis            | ICD-10-CM        |
| E13.630     | Other specified diabetes mellitus with periodontal disease                                                                                                                 | Diagnosis            | ICD-10-CM        |
| E13.638     | Other specified diabetes mellitus with other oral complications                                                                                                            | Diagnosis            | ICD-10-CM        |
| E13.641     | Other specified diabetes mellitus with hypoglycemia with coma                                                                                                              | Diagnosis            | ICD-10-CM        |
| E13.649     | Other specified diabetes mellitus with hypoglycemia without coma                                                                                                           | Diagnosis            | ICD-10-CM        |
| E13.65      | Other specified diabetes mellitus with hyperglycemia                                                                                                                       | Diagnosis            | ICD-10-CM        |

| <b>Code</b>          | <b>Description</b>                                                                       | <b>Code Category</b> | <b>Code Type</b> |
|----------------------|------------------------------------------------------------------------------------------|----------------------|------------------|
| E13.69               | Other specified diabetes mellitus with other specified complication                      | Diagnosis            | ICD-10-CM        |
| E13.9                | Other specified diabetes mellitus without complications                                  | Diagnosis            | ICD-10-CM        |
| E08.21               | Diabetes mellitus due to underlying condition with diabetic nephropathy                  | Diagnosis            | ICD-10-CM        |
| E08.22               | Diabetes mellitus due to underlying condition with diabetic chronic kidney disease       | Diagnosis            | ICD-10-CM        |
| E08.29               | Diabetes mellitus due to underlying condition with other diabetic kidney complication    | Diagnosis            | ICD-10-CM        |
| <b>Heart Failure</b> |                                                                                          |                      |                  |
| 428                  | Heart failure                                                                            | Diagnosis            | ICD-9-CM         |
| 428.0                | Congestive heart failure, unspecified                                                    | Diagnosis            | ICD-9-CM         |
| 428.1                | Left heart failure                                                                       | Diagnosis            | ICD-9-CM         |
| 428.2                | Systolic heart failure                                                                   | Diagnosis            | ICD-9-CM         |
| 428.20               | Unspecified systolic heart failure                                                       | Diagnosis            | ICD-9-CM         |
| 428.21               | Acute systolic heart failure                                                             | Diagnosis            | ICD-9-CM         |
| 428.22               | Chronic systolic heart failure                                                           | Diagnosis            | ICD-9-CM         |
| 428.23               | Acute on chronic systolic heart failure                                                  | Diagnosis            | ICD-9-CM         |
| 428.3                | Diastolic heart failure                                                                  | Diagnosis            | ICD-9-CM         |
| 428.30               | Unspecified diastolic heart failure                                                      | Diagnosis            | ICD-9-CM         |
| 428.31               | Acute diastolic heart failure                                                            | Diagnosis            | ICD-9-CM         |
| 428.32               | Chronic diastolic heart failure                                                          | Diagnosis            | ICD-9-CM         |
| 428.33               | Acute on chronic diastolic heart failure                                                 | Diagnosis            | ICD-9-CM         |
| 428.4                | Combined systolic and diastolic heart failure                                            | Diagnosis            | ICD-9-CM         |
| 428.40               | Unspecified combined systolic and diastolic heart failure                                | Diagnosis            | ICD-9-CM         |
| 428.41               | Acute combined systolic and diastolic heart failure                                      | Diagnosis            | ICD-9-CM         |
| 428.42               | Chronic combined systolic and diastolic heart failure                                    | Diagnosis            | ICD-9-CM         |
| 428.43               | Acute on chronic combined systolic and diastolic heart failure                           | Diagnosis            | ICD-9-CM         |
| 428.9                | Unspecified heart failure                                                                | Diagnosis            | ICD-9-CM         |
| I50.1                | Left ventricular failure, unspecified                                                    | Diagnosis            | ICD-10-CM        |
| I50.20               | Unspecified systolic (congestive) heart failure                                          | Diagnosis            | ICD-10-CM        |
| I50.21               | Acute systolic (congestive) heart failure                                                | Diagnosis            | ICD-10-CM        |
| I50.22               | Chronic systolic (congestive) heart failure                                              | Diagnosis            | ICD-10-CM        |
| I50.23               | Acute on chronic systolic (congestive) heart failure                                     | Diagnosis            | ICD-10-CM        |
| I50.30               | Unspecified diastolic (congestive) heart failure                                         | Diagnosis            | ICD-10-CM        |
| I50.31               | Acute diastolic (congestive) heart failure                                               | Diagnosis            | ICD-10-CM        |
| I50.32               | Chronic diastolic (congestive) heart failure                                             | Diagnosis            | ICD-10-CM        |
| I50.33               | Acute on chronic diastolic (congestive) heart failure                                    | Diagnosis            | ICD-10-CM        |
| I50.40               | Unspecified combined systolic (congestive) and diastolic (congestive) heart failure      | Diagnosis            | ICD-10-CM        |
| I50.41               | Acute combined systolic (congestive) and diastolic (congestive) heart failure            | Diagnosis            | ICD-10-CM        |
| I50.42               | Chronic combined systolic (congestive) and diastolic (congestive) heart failure          | Diagnosis            | ICD-10-CM        |
| I50.43               | Acute on chronic combined systolic (congestive) and diastolic (congestive) heart failure | Diagnosis            | ICD-10-CM        |
| I50.810              | Right heart failure, unspecified                                                         | Diagnosis            | ICD-10-CM        |
| I50.811              | Acute right heart failure                                                                | Diagnosis            | ICD-10-CM        |
| I50.812              | Chronic right heart failure                                                              | Diagnosis            | ICD-10-CM        |
| I50.813              | Acute on chronic right heart failure                                                     | Diagnosis            | ICD-10-CM        |
| I50.814              | Right heart failure due to left heart failure                                            | Diagnosis            | ICD-10-CM        |
| I50.82               | Biventricular heart failure                                                              | Diagnosis            | ICD-10-CM        |
| I50.83               | High output heart failure                                                                | Diagnosis            | ICD-10-CM        |



| Code                   | Description                                                                              | Code      |           |
|------------------------|------------------------------------------------------------------------------------------|-----------|-----------|
|                        |                                                                                          | Category  | Code Type |
| I50.84                 | End stage heart failure                                                                  | Diagnosis | ICD-10-CM |
| I50.89                 | Other heart failure                                                                      | Diagnosis | ICD-10-CM |
| I50.9                  | Heart failure, unspecified                                                               | Diagnosis | ICD-10-CM |
| Cardiovascular Disease |                                                                                          |           |           |
| 410                    | Acute myocardial infarction                                                              | Diagnosis | ICD-9-CM  |
| 410.0                  | Acute myocardial infarction of anterolateral wall                                        | Diagnosis | ICD-9-CM  |
| 410.00                 | Acute myocardial infarction of anterolateral wall, episode of care unspecified           | Diagnosis | ICD-9-CM  |
| 410.01                 | Acute myocardial infarction of anterolateral wall, initial episode of care               | Diagnosis | ICD-9-CM  |
| 410.02                 | Acute myocardial infarction of anterolateral wall, subsequent episode of care            | Diagnosis | ICD-9-CM  |
| 410.1                  | Acute myocardial infarction of other anterior wall                                       | Diagnosis | ICD-9-CM  |
| 410.10                 | Acute myocardial infarction of other anterior wall, episode of care unspecified          | Diagnosis | ICD-9-CM  |
| 410.11                 | Acute myocardial infarction of other anterior wall, initial episode of care              | Diagnosis | ICD-9-CM  |
| 410.12                 | Acute myocardial infarction of other anterior wall, subsequent episode of care           | Diagnosis | ICD-9-CM  |
| 410.2                  | Acute myocardial infarction of inferolateral wall                                        | Diagnosis | ICD-9-CM  |
| 410.20                 | Acute myocardial infarction of inferolateral wall, episode of care unspecified           | Diagnosis | ICD-9-CM  |
| 410.21                 | Acute myocardial infarction of inferolateral wall, initial episode of care               | Diagnosis | ICD-9-CM  |
| 410.22                 | Acute myocardial infarction of inferolateral wall, subsequent episode of care            | Diagnosis | ICD-9-CM  |
| 410.3                  | Acute myocardial infarction of inferoposterior wall                                      | Diagnosis | ICD-9-CM  |
| 410.30                 | Acute myocardial infarction of inferoposterior wall, episode of care unspecified         | Diagnosis | ICD-9-CM  |
| 410.31                 | Acute myocardial infarction of inferoposterior wall, initial episode of care             | Diagnosis | ICD-9-CM  |
| 410.32                 | Acute myocardial infarction of inferoposterior wall, subsequent episode of care          | Diagnosis | ICD-9-CM  |
| 410.4                  | Acute myocardial infarction of other inferior wall                                       | Diagnosis | ICD-9-CM  |
| 410.40                 | Acute myocardial infarction of other inferior wall, episode of care unspecified          | Diagnosis | ICD-9-CM  |
| 410.41                 | Acute myocardial infarction of other inferior wall, initial episode of care              | Diagnosis | ICD-9-CM  |
| 410.42                 | Acute myocardial infarction of other inferior wall, subsequent episode of care           | Diagnosis | ICD-9-CM  |
| 410.5                  | Acute myocardial infarction of other lateral wall                                        | Diagnosis | ICD-9-CM  |
| 410.50                 | Acute myocardial infarction of other lateral wall, episode of care unspecified           | Diagnosis | ICD-9-CM  |
| 410.51                 | Acute myocardial infarction of other lateral wall, initial episode of care               | Diagnosis | ICD-9-CM  |
| 410.52                 | Acute myocardial infarction of other lateral wall, subsequent episode of care            | Diagnosis | ICD-9-CM  |
| 410.6                  | Acute myocardial infarction, true posterior wall infarction                              | Diagnosis | ICD-9-CM  |
| 410.60                 | Acute myocardial infarction, true posterior wall infarction, episode of care unspecified | Diagnosis | ICD-9-CM  |
| 410.61                 | Acute myocardial infarction, true posterior wall infarction, initial episode of care     | Diagnosis | ICD-9-CM  |
| 410.62                 | Acute myocardial infarction, true posterior wall infarction, subsequent episode of care  | Diagnosis | ICD-9-CM  |
| 410.7                  | Acute myocardial infarction, subendocardial infarction                                   | Diagnosis | ICD-9-CM  |
| 410.70                 | Acute myocardial infarction, subendocardial infarction, episode of care unspecified      | Diagnosis | ICD-9-CM  |
| 410.71                 | Acute myocardial infarction, subendocardial infarction, initial episode of care          | Diagnosis | ICD-9-CM  |
| 410.72                 | Acute myocardial infarction, subendocardial infarction, subsequent episode of care       | Diagnosis | ICD-9-CM  |
| 410.8                  | Acute myocardial infarction of other specified sites                                     | Diagnosis | ICD-9-CM  |
| 410.80                 | Acute myocardial infarction of other specified sites, episode of care unspecified        | Diagnosis | ICD-9-CM  |
| 410.81                 | Acute myocardial infarction of other specified sites, initial episode of care            | Diagnosis | ICD-9-CM  |
| 410.82                 | Acute myocardial infarction of other specified sites, subsequent episode of care         | Diagnosis | ICD-9-CM  |

| <b>Code</b> | <b>Description</b>                                                                            | <b>Code Category</b> | <b>Code Type</b> |
|-------------|-----------------------------------------------------------------------------------------------|----------------------|------------------|
| 410.9       | Acute myocardial infarction, unspecified site                                                 | Diagnosis            | ICD-9-CM         |
| 410.90      | Acute myocardial infarction, unspecified site, episode of care unspecified                    | Diagnosis            | ICD-9-CM         |
| 410.91      | Acute myocardial infarction, unspecified site, initial episode of care                        | Diagnosis            | ICD-9-CM         |
| 410.92      | Acute myocardial infarction, unspecified site, subsequent episode of care                     | Diagnosis            | ICD-9-CM         |
| 411         | Other acute and subacute forms of ischemic heart disease                                      | Diagnosis            | ICD-9-CM         |
| 411.0       | Postmyocardial infarction syndrome                                                            | Diagnosis            | ICD-9-CM         |
| 411.1       | Intermediate coronary syndrome                                                                | Diagnosis            | ICD-9-CM         |
| 411.8       | Other acute and subacute forms of ischemic heart disease                                      | Diagnosis            | ICD-9-CM         |
| 411.81      | Acute coronary occlusion without myocardial infarction                                        | Diagnosis            | ICD-9-CM         |
| 411.89      | Other acute and subacute form of ischemic heart disease                                       | Diagnosis            | ICD-9-CM         |
| 412         | Old myocardial infarction                                                                     | Diagnosis            | ICD-9-CM         |
| 413         | Angina pectoris                                                                               | Diagnosis            | ICD-9-CM         |
| 413.0       | Angina decubitus                                                                              | Diagnosis            | ICD-9-CM         |
| 413.1       | Prinzmetal angina                                                                             | Diagnosis            | ICD-9-CM         |
| 413.9       | Other and unspecified angina pectoris                                                         | Diagnosis            | ICD-9-CM         |
| 414         | Other forms of chronic ischemic heart disease                                                 | Diagnosis            | ICD-9-CM         |
| 414.0       | Coronary atherosclerosis                                                                      | Diagnosis            | ICD-9-CM         |
| 414.00      | Coronary atherosclerosis of unspecified type of vessel, native or graft                       | Diagnosis            | ICD-9-CM         |
| 414.01      | Coronary atherosclerosis of native coronary artery                                            | Diagnosis            | ICD-9-CM         |
| 414.02      | Coronary atherosclerosis of autologous vein bypass graft                                      | Diagnosis            | ICD-9-CM         |
| 414.03      | Coronary atherosclerosis of nonautologous biological bypass graft                             | Diagnosis            | ICD-9-CM         |
| 414.04      | Coronary atherosclerosis of artery bypass graft                                               | Diagnosis            | ICD-9-CM         |
| 414.05      | Coronary atherosclerosis of unspecified type of bypass graft                                  | Diagnosis            | ICD-9-CM         |
| 414.06      | Coronary atherosclerosis, of native coronary artery of transplanted heart                     | Diagnosis            | ICD-9-CM         |
| 414.07      | Coronary atherosclerosis, of bypass graft (artery) (vein) of transplanted heart               | Diagnosis            | ICD-9-CM         |
| 414.1       | Aneurysm and dissection of heart                                                              | Diagnosis            | ICD-9-CM         |
| 414.10      | Aneurysm of heart                                                                             | Diagnosis            | ICD-9-CM         |
| 414.11      | Aneurysm of coronary vessels                                                                  | Diagnosis            | ICD-9-CM         |
| 414.12      | Dissection of coronary artery                                                                 | Diagnosis            | ICD-9-CM         |
| 414.19      | Other aneurysm of heart                                                                       | Diagnosis            | ICD-9-CM         |
| 414.2       | Chronic total occlusion of coronary artery                                                    | Diagnosis            | ICD-9-CM         |
| 414.3       | Coronary atherosclerosis due to lipid rich plaque                                             | Diagnosis            | ICD-9-CM         |
| 414.4       | Coronary atherosclerosis due to calcified coronary lesion                                     | Diagnosis            | ICD-9-CM         |
| 414.8       | Other specified forms of chronic ischemic heart disease                                       | Diagnosis            | ICD-9-CM         |
| 414.9       | Unspecified chronic ischemic heart disease                                                    | Diagnosis            | ICD-9-CM         |
| I20.0       | Unstable angina                                                                               | Diagnosis            | ICD-10-CM        |
| I20.1       | Angina pectoris with documented spasm                                                         | Diagnosis            | ICD-10-CM        |
| I20.8       | Other forms of angina pectoris                                                                | Diagnosis            | ICD-10-CM        |
| I20.9       | Angina pectoris, unspecified                                                                  | Diagnosis            | ICD-10-CM        |
| I21.01      | ST elevation (STEMI) myocardial infarction involving left main coronary artery                | Diagnosis            | ICD-10-CM        |
| I21.02      | ST elevation (STEMI) myocardial infarction involving left anterior descending coronary artery | Diagnosis            | ICD-10-CM        |
| I21.09      | ST elevation (STEMI) myocardial infarction involving other coronary artery of anterior wall   | Diagnosis            | ICD-10-CM        |
| I21.11      | ST elevation (STEMI) myocardial infarction involving right coronary artery                    | Diagnosis            | ICD-10-CM        |

| Code    | Description                                                                                                 | Code      |           |
|---------|-------------------------------------------------------------------------------------------------------------|-----------|-----------|
|         |                                                                                                             | Category  | Code Type |
| I21.19  | ST elevation (STEMI) myocardial infarction involving other coronary artery of inferior wall                 | Diagnosis | ICD-10-CM |
| I21.21  | ST elevation (STEMI) myocardial infarction involving left circumflex coronary artery                        | Diagnosis | ICD-10-CM |
| I21.29  | ST elevation (STEMI) myocardial infarction involving other sites                                            | Diagnosis | ICD-10-CM |
| I21.3   | ST elevation (STEMI) myocardial infarction of unspecified site                                              | Diagnosis | ICD-10-CM |
| I21.4   | Non-ST elevation (NSTEMI) myocardial infarction                                                             | Diagnosis | ICD-10-CM |
| I21.9   | Acute myocardial infarction, unspecified                                                                    | Diagnosis | ICD-10-CM |
| I21.A1  | Myocardial infarction type 2                                                                                | Diagnosis | ICD-10-CM |
| I21.A9  | Other myocardial infarction type                                                                            | Diagnosis | ICD-10-CM |
| I22.0   | Subsequent ST elevation (STEMI) myocardial infarction of anterior wall                                      | Diagnosis | ICD-10-CM |
| I22.1   | Subsequent ST elevation (STEMI) myocardial infarction of inferior wall                                      | Diagnosis | ICD-10-CM |
| I22.2   | Subsequent non-ST elevation (NSTEMI) myocardial infarction                                                  | Diagnosis | ICD-10-CM |
| I22.8   | Subsequent ST elevation (STEMI) myocardial infarction of other sites                                        | Diagnosis | ICD-10-CM |
| I22.9   | Subsequent ST elevation (STEMI) myocardial infarction of unspecified site                                   | Diagnosis | ICD-10-CM |
| I24.0   | Acute coronary thrombosis not resulting in myocardial infarction                                            | Diagnosis | ICD-10-CM |
| I24.1   | Dressler's syndrome                                                                                         | Diagnosis | ICD-10-CM |
| I24.8   | Other forms of acute ischemic heart disease                                                                 | Diagnosis | ICD-10-CM |
| I24.9   | Acute ischemic heart disease, unspecified                                                                   | Diagnosis | ICD-10-CM |
| I25.10  | Atherosclerotic heart disease of native coronary artery without angina pectoris                             | Diagnosis | ICD-10-CM |
| I25.110 | Atherosclerotic heart disease of native coronary artery with unstable angina pectoris                       | Diagnosis | ICD-10-CM |
| I25.111 | Atherosclerotic heart disease of native coronary artery with angina pectoris with documented spasm          | Diagnosis | ICD-10-CM |
| I25.118 | Atherosclerotic heart disease of native coronary artery with other forms of angina pectoris                 | Diagnosis | ICD-10-CM |
| I25.119 | Atherosclerotic heart disease of native coronary artery with unspecified angina pectoris                    | Diagnosis | ICD-10-CM |
| I25.2   | Old myocardial infarction                                                                                   | Diagnosis | ICD-10-CM |
| I25.3   | Aneurysm of heart                                                                                           | Diagnosis | ICD-10-CM |
| I25.41  | Coronary artery aneurysm                                                                                    | Diagnosis | ICD-10-CM |
| I25.42  | Coronary artery dissection                                                                                  | Diagnosis | ICD-10-CM |
| I25.5   | Ischemic cardiomyopathy                                                                                     | Diagnosis | ICD-10-CM |
| I25.6   | Silent myocardial ischemia                                                                                  | Diagnosis | ICD-10-CM |
| I25.700 | Atherosclerosis of coronary artery bypass graft(s), unspecified, with unstable angina pectoris              | Diagnosis | ICD-10-CM |
| I25.701 | Atherosclerosis of coronary artery bypass graft(s), unspecified, with angina pectoris with documented spasm | Diagnosis | ICD-10-CM |
| I25.708 | Atherosclerosis of coronary artery bypass graft(s), unspecified, with other forms of angina pectoris        | Diagnosis | ICD-10-CM |
| I25.709 | Atherosclerosis of coronary artery bypass graft(s), unspecified, with unspecified angina pectoris           | Diagnosis | ICD-10-CM |
| I25.710 | Atherosclerosis of autologous vein coronary artery bypass graft(s) with unstable angina pectoris            | Diagnosis | ICD-10-CM |

| Code    | Description                                                                                                            | Code      |           |
|---------|------------------------------------------------------------------------------------------------------------------------|-----------|-----------|
|         |                                                                                                                        | Category  | Code Type |
| I25.711 | Atherosclerosis of autologous vein coronary artery bypass graft(s) with angina pectoris with documented spasm          | Diagnosis | ICD-10-CM |
| I25.718 | Atherosclerosis of autologous vein coronary artery bypass graft(s) with other forms of angina pectoris                 | Diagnosis | ICD-10-CM |
| I25.719 | Atherosclerosis of autologous vein coronary artery bypass graft(s) with unspecified angina pectoris                    | Diagnosis | ICD-10-CM |
| I25.720 | Atherosclerosis of autologous artery coronary artery bypass graft(s) with unstable angina pectoris                     | Diagnosis | ICD-10-CM |
| I25.721 | Atherosclerosis of autologous artery coronary artery bypass graft(s) with angina pectoris with documented spasm        | Diagnosis | ICD-10-CM |
| I25.728 | Atherosclerosis of autologous artery coronary artery bypass graft(s) with other forms of angina pectoris               | Diagnosis | ICD-10-CM |
| I25.729 | Atherosclerosis of autologous artery coronary artery bypass graft(s) with unspecified angina pectoris                  | Diagnosis | ICD-10-CM |
| I25.730 | Atherosclerosis of nonautologous biological coronary artery bypass graft(s) with unstable angina pectoris              | Diagnosis | ICD-10-CM |
| I25.731 | Atherosclerosis of nonautologous biological coronary artery bypass graft(s) with angina pectoris with documented spasm | Diagnosis | ICD-10-CM |
| I25.738 | Atherosclerosis of nonautologous biological coronary artery bypass graft(s) with other forms of angina pectoris        | Diagnosis | ICD-10-CM |
| I25.739 | Atherosclerosis of nonautologous biological coronary artery bypass graft(s) with unspecified angina pectoris           | Diagnosis | ICD-10-CM |
| I25.750 | Atherosclerosis of native coronary artery of transplanted heart with unstable angina                                   | Diagnosis | ICD-10-CM |
| I25.751 | Atherosclerosis of native coronary artery of transplanted heart with angina pectoris with documented spasm             | Diagnosis | ICD-10-CM |
| I25.758 | Atherosclerosis of native coronary artery of transplanted heart with other forms of angina pectoris                    | Diagnosis | ICD-10-CM |
| I25.759 | Atherosclerosis of native coronary artery of transplanted heart with unspecified angina pectoris                       | Diagnosis | ICD-10-CM |
| I25.760 | Atherosclerosis of bypass graft of coronary artery of transplanted heart with unstable angina                          | Diagnosis | ICD-10-CM |
| I25.761 | Atherosclerosis of bypass graft of coronary artery of transplanted heart with angina pectoris with documented spasm    | Diagnosis | ICD-10-CM |
| I25.768 | Atherosclerosis of bypass graft of coronary artery of transplanted heart with other forms of angina pectoris           | Diagnosis | ICD-10-CM |
| I25.769 | Atherosclerosis of bypass graft of coronary artery of transplanted heart with unspecified angina pectoris              | Diagnosis | ICD-10-CM |
| I25.790 | Atherosclerosis of other coronary artery bypass graft(s) with unstable angina pectoris                                 | Diagnosis | ICD-10-CM |
| I25.791 | Atherosclerosis of other coronary artery bypass graft(s) with angina pectoris with documented spasm                    | Diagnosis | ICD-10-CM |
| I25.798 | Atherosclerosis of other coronary artery bypass graft(s) with other forms of angina pectoris                           | Diagnosis | ICD-10-CM |

| <b>Code</b>                     | <b>Description</b>                                                                               | <b>Code Category</b> | <b>Code Type</b> |
|---------------------------------|--------------------------------------------------------------------------------------------------|----------------------|------------------|
| I25.799                         | Atherosclerosis of other coronary artery bypass graft(s) with unspecified angina pectoris        | Diagnosis            | ICD-10-CM        |
| I25.810                         | Atherosclerosis of coronary artery bypass graft(s) without angina pectoris                       | Diagnosis            | ICD-10-CM        |
| I25.811                         | Atherosclerosis of native coronary artery of transplanted heart without angina pectoris          | Diagnosis            | ICD-10-CM        |
| I25.812                         | Atherosclerosis of bypass graft of coronary artery of transplanted heart without angina pectoris | Diagnosis            | ICD-10-CM        |
| I25.82                          | Chronic total occlusion of coronary artery                                                       | Diagnosis            | ICD-10-CM        |
| I25.83                          | Coronary atherosclerosis due to lipid rich plaque                                                | Diagnosis            | ICD-10-CM        |
| I25.84                          | Coronary atherosclerosis due to calcified coronary lesion                                        | Diagnosis            | ICD-10-CM        |
| I25.89                          | Other forms of chronic ischemic heart disease                                                    | Diagnosis            | ICD-10-CM        |
| I25.9                           | Chronic ischemic heart disease, unspecified                                                      | Diagnosis            | ICD-10-CM        |
| <b>Congenital Heart Disease</b> |                                                                                                  |                      |                  |
| P293                            | Persistent fetal circulation                                                                     | Diagnosis            | ICD-10-CM        |
| P298                            | Oth cardiovasc disorders originating in the perinatal period                                     | Diagnosis            | ICD-10-CM        |
| P2938                           | Other persistent fetal circulation                                                               | Diagnosis            | ICD-10-CM        |
| Q20                             | Congenital malformations of cardiac chambers and connections                                     | Diagnosis            | ICD-10-CM        |
| Q21                             | Congenital malformations of cardiac septa                                                        | Diagnosis            | ICD-10-CM        |
| Q22                             | Congenital malformations of pulmonary and tricuspid valves                                       | Diagnosis            | ICD-10-CM        |
| Q23                             | Congenital malformations of aortic and mitral valves                                             | Diagnosis            | ICD-10-CM        |
| Q24                             | Other congenital malformations of heart                                                          | Diagnosis            | ICD-10-CM        |
| Q200                            | Common arterial trunk                                                                            | Diagnosis            | ICD-10-CM        |
| Q201                            | Double outlet right ventricle                                                                    | Diagnosis            | ICD-10-CM        |
| Q202                            | Double outlet left ventricle                                                                     | Diagnosis            | ICD-10-CM        |
| Q203                            | Discordant ventriculoarterial connection                                                         | Diagnosis            | ICD-10-CM        |
| Q204                            | Double inlet ventricle                                                                           | Diagnosis            | ICD-10-CM        |
| Q205                            | Discordant atrioventricular connection                                                           | Diagnosis            | ICD-10-CM        |
| Q206                            | Isomerism of atrial appendages                                                                   | Diagnosis            | ICD-10-CM        |
| Q208                            | Oth congenital malform of cardiac chambers and connections                                       | Diagnosis            | ICD-10-CM        |
| Q209                            | Congenital malform of cardiac chambers and connections, unsp                                     | Diagnosis            | ICD-10-CM        |
| Q210                            | Ventricular septal defect                                                                        | Diagnosis            | ICD-10-CM        |
| Q211                            | Atrial septal defect                                                                             | Diagnosis            | ICD-10-CM        |
| Q212                            | Atrioventricular septal defect                                                                   | Diagnosis            | ICD-10-CM        |
| Q213                            | Tetralogy of Fallot                                                                              | Diagnosis            | ICD-10-CM        |
| Q214                            | Aortopulmonary septal defect                                                                     | Diagnosis            | ICD-10-CM        |
| Q218                            | Other congenital malformations of cardiac septa                                                  | Diagnosis            | ICD-10-CM        |
| Q219                            | Congenital malformation of cardiac septum, unspecified                                           | Diagnosis            | ICD-10-CM        |
| Q220                            | Pulmonary valve atresia                                                                          | Diagnosis            | ICD-10-CM        |
| Q221                            | Congenital pulmonary valve stenosis                                                              | Diagnosis            | ICD-10-CM        |
| Q222                            | Congenital pulmonary valve insufficiency                                                         | Diagnosis            | ICD-10-CM        |
| Q223                            | Other congenital malformations of pulmonary valve                                                | Diagnosis            | ICD-10-CM        |
| Q224                            | Congenital tricuspid stenosis                                                                    | Diagnosis            | ICD-10-CM        |
| Q225                            | Ebstein's anomaly                                                                                | Diagnosis            | ICD-10-CM        |
| Q226                            | Hypoplastic right heart syndrome                                                                 | Diagnosis            | ICD-10-CM        |
| Q228                            | Other congenital malformations of tricuspid valve                                                | Diagnosis            | ICD-10-CM        |

| <b>Code</b> | <b>Description</b>                                         | <b>Code Category</b> | <b>Code Type</b> |
|-------------|------------------------------------------------------------|----------------------|------------------|
| Q229        | Congenital malformation of tricuspid valve, unspecified    | Diagnosis            | ICD-10-CM        |
| Q230        | Congenital stenosis of aortic valve                        | Diagnosis            | ICD-10-CM        |
| Q231        | Congenital insufficiency of aortic valve                   | Diagnosis            | ICD-10-CM        |
| Q232        | Congenital mitral stenosis                                 | Diagnosis            | ICD-10-CM        |
| Q233        | Congenital mitral insufficiency                            | Diagnosis            | ICD-10-CM        |
| Q234        | Hypoplastic left heart syndrome                            | Diagnosis            | ICD-10-CM        |
| Q238        | Other congenital malformations of aortic and mitral valves | Diagnosis            | ICD-10-CM        |
| Q239        | Congenital malformation of aortic and mitral valves, unsp  | Diagnosis            | ICD-10-CM        |
| Q240        | Dextrocardia                                               | Diagnosis            | ICD-10-CM        |
| Q241        | Levocardia                                                 | Diagnosis            | ICD-10-CM        |
| Q242        | Cor triatriatum                                            | Diagnosis            | ICD-10-CM        |
| Q243        | Pulmonary infundibular stenosis                            | Diagnosis            | ICD-10-CM        |
| Q244        | Congenital subaortic stenosis                              | Diagnosis            | ICD-10-CM        |
| Q245        | Malformation of coronary vessels                           | Diagnosis            | ICD-10-CM        |
| Q246        | Congenital heart block                                     | Diagnosis            | ICD-10-CM        |
| Q248        | Other specified congenital malformations of heart          | Diagnosis            | ICD-10-CM        |
| Q249        | Congenital malformation of heart, unspecified              | Diagnosis            | ICD-10-CM        |
| Q250        | Patent ductus arteriosus                                   | Diagnosis            | ICD-10-CM        |
| Q251        | Coarctation of aorta                                       | Diagnosis            | ICD-10-CM        |
| Q2521       | Interruption of aortic arch                                | Diagnosis            | ICD-10-CM        |
| Q2529       | Other atresia of aorta                                     | Diagnosis            | ICD-10-CM        |
| Q253        | Supravalvular aortic stenosis                              | Diagnosis            | ICD-10-CM        |
| Q2540       | Congenital malformation of aorta unspecified               | Diagnosis            | ICD-10-CM        |
| Q2541       | Absence and aplasia of aorta                               | Diagnosis            | ICD-10-CM        |
| Q2542       | Hypoplasia of aorta                                        | Diagnosis            | ICD-10-CM        |
| Q2543       | Congenital aneurysm of aorta                               | Diagnosis            | ICD-10-CM        |
| Q2544       | Congenital dilation of aorta                               | Diagnosis            | ICD-10-CM        |
| Q2545       | Double aortic arch                                         | Diagnosis            | ICD-10-CM        |
| Q2546       | Tortuous aortic arch                                       | Diagnosis            | ICD-10-CM        |
| Q2547       | Right aortic arch                                          | Diagnosis            | ICD-10-CM        |
| Q2548       | Anomalous origin of subclavian artery                      | Diagnosis            | ICD-10-CM        |
| Q2549       | Other congenital malformations of aorta                    | Diagnosis            | ICD-10-CM        |
| Q255        | Atresia of pulmonary artery                                | Diagnosis            | ICD-10-CM        |
| Q256        | Stenosis of pulmonary artery                               | Diagnosis            | ICD-10-CM        |
| Q2571       | Coarctation of pulmonary artery                            | Diagnosis            | ICD-10-CM        |
| Q2572       | Congenital pulmonary arteriovenous malformation            | Diagnosis            | ICD-10-CM        |
| Q2579       | Other congenital malformations of pulmonary artery         | Diagnosis            | ICD-10-CM        |
| Q258        | Other congenital malformations of other great arteries     | Diagnosis            | ICD-10-CM        |
| Q259        | Congenital malformation of great arteries, unspecified     | Diagnosis            | ICD-10-CM        |
| Q260        | Congenital stenosis of vena cava                           | Diagnosis            | ICD-10-CM        |
| Q261        | Persistent left superior vena cava                         | Diagnosis            | ICD-10-CM        |
| Q262        | Total anomalous pulmonary venous connection                | Diagnosis            | ICD-10-CM        |
| Q263        | Partial anomalous pulmonary venous connection              | Diagnosis            | ICD-10-CM        |
| Q264        | Anomalous pulmonary venous connection, unspecified         | Diagnosis            | ICD-10-CM        |
| Q8740       | Marfan's syndrome, unspecified                             | Diagnosis            | ICD-10-CM        |

| Code    | Description                                                                                                                                                                                                                                                     | Code      |            |
|---------|-----------------------------------------------------------------------------------------------------------------------------------------------------------------------------------------------------------------------------------------------------------------|-----------|------------|
|         |                                                                                                                                                                                                                                                                 | Category  | Code Type  |
| Q8741   | Marfan's syndrome with cardiovascular manifestations                                                                                                                                                                                                            | Diagnosis | ICD-10-CM  |
| Q87410  | Marfan's syndrome with aortic dilation                                                                                                                                                                                                                          | Diagnosis | ICD-10-CM  |
| Q87418  | Marfan's syndrome with other cardiovascular manifestations                                                                                                                                                                                                      | Diagnosis | ICD-10-CM  |
| Q8782   | Arterial tortuosity syndrome                                                                                                                                                                                                                                    | Diagnosis | ICD-10-CM  |
| Q900    | Trisomy 21, nonmosaicism (meiotic nondisjunction)                                                                                                                                                                                                               | Diagnosis | ICD-10-CM  |
| Q901    | Trisomy 21, mosaicism (mitotic nondisjunction)                                                                                                                                                                                                                  | Diagnosis | ICD-10-CM  |
| Q902    | Trisomy 21, translocation                                                                                                                                                                                                                                       | Diagnosis | ICD-10-CM  |
| Q909    | Down syndrome, unspecified                                                                                                                                                                                                                                      | Diagnosis | ICD-10-CM  |
| Q910    | Trisomy 18, nonmosaicism (meiotic nondisjunction)                                                                                                                                                                                                               | Diagnosis | ICD-10-CM  |
| Q911    | Trisomy 18, mosaicism (mitotic nondisjunction)                                                                                                                                                                                                                  | Diagnosis | ICD-10-CM  |
| Q912    | Trisomy 18, translocation                                                                                                                                                                                                                                       | Diagnosis | ICD-10-CM  |
| Q913    | Trisomy 18, unspecified                                                                                                                                                                                                                                         | Diagnosis | ICD-10-CM  |
| Q914    | Trisomy 13, nonmosaicism (meiotic nondisjunction)                                                                                                                                                                                                               | Diagnosis | ICD-10-CM  |
| Q915    | Trisomy 13, mosaicism (mitotic nondisjunction)                                                                                                                                                                                                                  | Diagnosis | ICD-10-CM  |
| Q916    | Trisomy 13, translocation                                                                                                                                                                                                                                       | Diagnosis | ICD-10-CM  |
| Q917    | Trisomy 13, unspecified                                                                                                                                                                                                                                         | Diagnosis | ICD-10-CM  |
| Q9381   | Velo-cardio-facial syndrome                                                                                                                                                                                                                                     | Diagnosis | ICD-10-CM  |
| Q9382   | Williams syndrome                                                                                                                                                                                                                                               | Diagnosis | ICD-10-CM  |
| 02Q50ZZ | Repair Atrial Septum, Open Approach                                                                                                                                                                                                                             | Procedure | ICD-10-PCS |
| 02U507Z | Supplement Atrial Septum with Autologous Tissue Substitute, Open Approach                                                                                                                                                                                       | Procedure | ICD-10-PCS |
| 02U50JZ | Supplement Atrial Septum with Synthetic Substitute, Open Approach                                                                                                                                                                                               | Procedure | ICD-10-PCS |
| 02U53JZ | Supplement Atrial Septum with Synthetic Substitute, Percutaneous Approach                                                                                                                                                                                       | Procedure | ICD-10-PCS |
| 02QM0ZZ | Repair Ventricular Septum, Open Approach                                                                                                                                                                                                                        | Procedure | ICD-10-PCS |
| 02UM07Z | Supplement Ventricular Septum with Autologous Tissue Substitute, Open Approach                                                                                                                                                                                  | Procedure | ICD-10-PCS |
| 02UM0JZ | Supplement Ventricular Septum with Synthetic Substitute, Open Approach                                                                                                                                                                                          | Procedure | ICD-10-PCS |
| 02UM3JZ | Supplement Ventricular Septum with Synthetic Substitute, Percutaneous Approach                                                                                                                                                                                  | Procedure | ICD-10-PCS |
| 93530   | Right heart catheterization, for congenital cardiac anomalies                                                                                                                                                                                                   | Procedure | CPT-4      |
| 93531   | Combined right heart catheterization and retrograde left heart catheterization, for congenital cardiac anomalies                                                                                                                                                | Procedure | CPT-4      |
| 93532   | Combined right heart catheterization and transseptal left heart catheterization through intact septum with or without retrograde left heart catheterization, for congenital cardiac anomalies                                                                   | Procedure | CPT-4      |
| 93533   | Combined right heart catheterization and transseptal left heart catheterization through existing septal opening, with or without retrograde left heart catheterization, for congenital cardiac anomalies                                                        | Procedure | CPT-4      |
| 75573   | Computed tomography, heart, with contrast material, for evaluation of cardiac structure and morphology in the setting of congenital heart disease (including 3D image postprocessing, assessment of LV cardiac function, RV structure and function and evaluati | Procedure | CPT-4      |
| 75572   | Computed tomography, heart, with contrast material, for evaluation of cardiac structure and morphology (including 3D image postprocessing, assessment of cardiac function, and evaluation of venous structures, if performed)                                   | Procedure | CPT-4      |
| 33924   | Ligation and takedown of a systemic-to-pulmonary artery shunt, performed in conjunction with a congenital heart procedure (List separately in addition to code for primary procedure)                                                                           | Procedure | CPT-4      |

| Code  | Description                                                                                                                                                                                                                                                     | Code      |           |
|-------|-----------------------------------------------------------------------------------------------------------------------------------------------------------------------------------------------------------------------------------------------------------------|-----------|-----------|
|       |                                                                                                                                                                                                                                                                 | Category  | Code Type |
| 93563 | Injection procedure during cardiac catheterization including imaging supervision, interpretation, and report, for selective coronary angiography during congenital heart catheterization (List separately in addition to code for primary procedure)            | Procedure | CPT-4     |
| 93564 | Injection procedure during cardiac catheterization including imaging supervision, interpretation, and report, for selective opacification of aortocoronary venous or arterial bypass graft(s) (eg, aortocoronary saphenous vein, free radial artery, or free ma | Procedure | CPT-4     |
| 33647 | Repair of atrial septal defect and ventricular septal defect, with direct or patch closure                                                                                                                                                                      | Procedure | CPT-4     |
| 33720 | Repair sinus of Valsalva aneurysm, with cardiopulmonary bypass                                                                                                                                                                                                  | Procedure | CPT-4     |
| 33745 | Transcatheter intracardiac shunt (TIS) creation by stent placement for congenital cardiac anomalies to establish effective intracardiac flow, including all imaging guidance by the proceduralist, when performed, left and right heart diagnostic cardiac cath | Procedure | CPT-4     |
| 33746 | Transcatheter intracardiac shunt (TIS) creation by stent placement for congenital cardiac anomalies to establish effective intracardiac flow, including all imaging guidance by the proceduralist, when performed, left and right heart diagnostic cardiac cath | Procedure | CPT-4     |
| 33741 | Transcatheter atrial septostomy (TAS) for congenital cardiac anomalies to create effective atrial flow, including all imaging guidance by the proceduralist, when performed, any method (eg, Rashkind, Sang-Park, balloon, cutting balloon, blade)              | Procedure | CPT-4     |
| 93303 | Transthoracic echocardiography for congenital cardiac anomalies, complete                                                                                                                                                                                       | Procedure | CPT-4     |
| 93304 | Transthoracic echocardiography for congenital cardiac anomalies, follow-up or limited                                                                                                                                                                           | Procedure | CPT-4     |
| 93316 | Transesophageal echocardiography for congenital cardiac anomalies, placement of transesophageal probe only, image acquisition, interpretation and report only                                                                                                   | Procedure | CPT-4     |
| 93317 | Transesophageal echocardiography for congenital cardiac anomalies                                                                                                                                                                                               | Procedure | CPT-4     |
| 93315 | Transesophageal echocardiography for congenital cardiac anomalies, including probe placement, image acquisition, interpretation and report                                                                                                                      | Procedure | CPT-4     |
| 93581 | Percutaneous transcatheter closure of a congenital ventricular septal defect with implant                                                                                                                                                                       | Procedure | CPT-4     |
| 93580 | Percutaneous transcatheter closure of congenital interatrial communication (ie, Fontan fenestration, atrial septal defect) with implant                                                                                                                         | Procedure | CPT-4     |

#### Hematological Disorders

|        |                                                                |           |          |
|--------|----------------------------------------------------------------|-----------|----------|
| 280    | Iron deficiency anemias                                        | Diagnosis | ICD-9-CM |
| 281.0  | Pernicious anemia                                              | Diagnosis | ICD-9-CM |
| 281.1  | Other vitamin B12 deficiency anemia                            | Diagnosis | ICD-9-CM |
| 281.2  | Folate-deficiency anemia                                       | Diagnosis | ICD-9-CM |
| 281.3  | Other specified megaloblastic anemias not elsewhere classified | Diagnosis | ICD-9-CM |
| 282.4  | Thalassemias                                                   | Diagnosis | ICD-9-CM |
| 282.40 | Thalassemia, unspecified                                       | Diagnosis | ICD-9-CM |
| 282.41 | Sickle-cell thalassemia without crisis                         | Diagnosis | ICD-9-CM |
| 282.42 | Sickle-cell thalassemia with crisis                            | Diagnosis | ICD-9-CM |
| 282.43 | Alpha thalassemia                                              | Diagnosis | ICD-9-CM |
| 282.44 | Beta thalassemia                                               | Diagnosis | ICD-9-CM |



| <b>Code</b> | <b>Description</b>                                      | <b>Code Category</b> | <b>Code Type</b> |
|-------------|---------------------------------------------------------|----------------------|------------------|
| 282.45      | Delta-beta thalassemia                                  | Diagnosis            | ICD-9-CM         |
| 282.46      | Thalassemia minor                                       | Diagnosis            | ICD-9-CM         |
| 282.47      | Hemoglobin E-beta thalassemia                           | Diagnosis            | ICD-9-CM         |
| 282.49      | Other thalassemia                                       | Diagnosis            | ICD-9-CM         |
| 282.5       | Sickle-cell trait                                       | Diagnosis            | ICD-9-CM         |
| 282.6       | Sickle-cell disease                                     | Diagnosis            | ICD-9-CM         |
| 282.60      | Sickle-cell disease, unspecified                        | Diagnosis            | ICD-9-CM         |
| 282.63      | Sickle-cell/Hb-C disease without crisis                 | Diagnosis            | ICD-9-CM         |
| 282.64      | Sickle-cell/Hb-C disease with crisis                    | Diagnosis            | ICD-9-CM         |
| 282.68      | Other sickle-cell disease without crisis                | Diagnosis            | ICD-9-CM         |
| 282.69      | Other sickle-cell disease with crisis                   | Diagnosis            | ICD-9-CM         |
| 282.7       | Other hemoglobinopathies                                | Diagnosis            | ICD-9-CM         |
| 282.8       | Other specified hereditary hemolytic anemias            | Diagnosis            | ICD-9-CM         |
| 282.9       | Unspecified hereditary hemolytic anemia                 | Diagnosis            | ICD-9-CM         |
| 283         | Acquired hemolytic anemias                              | Diagnosis            | ICD-9-CM         |
| 283.0       | Autoimmune hemolytic anemias                            | Diagnosis            | ICD-9-CM         |
| 283.1       | Non-autoimmune hemolytic anemias                        | Diagnosis            | ICD-9-CM         |
| 283.10      | Unspecified non-autoimmune hemolytic anemia             | Diagnosis            | ICD-9-CM         |
| 283.11      | Hemolytic-uremic syndrome                               | Diagnosis            | ICD-9-CM         |
| 283.19      | Other non-autoimmune hemolytic anemias                  | Diagnosis            | ICD-9-CM         |
| 283.9       | Acquired hemolytic anemia, unspecified                  | Diagnosis            | ICD-9-CM         |
| 284         | Aplastic anemia and other bone marrow failure syndromes | Diagnosis            | ICD-9-CM         |
| 284.0       | Constitutional aplastic anemia                          | Diagnosis            | ICD-9-CM         |
| 284.01      | Constitutional red blood cell aplasia                   | Diagnosis            | ICD-9-CM         |
| 284.09      | Other constitutional aplastic anemia                    | Diagnosis            | ICD-9-CM         |
| 284.1       | Pancytopenia                                            | Diagnosis            | ICD-9-CM         |
| 284.11      | Antineoplastic chemotherapy induced pancytopenia        | Diagnosis            | ICD-9-CM         |
| 284.12      | Other drug induced pancytopenia                         | Diagnosis            | ICD-9-CM         |
| 284.19      | Other pancytopenia                                      | Diagnosis            | ICD-9-CM         |
| 284.2       | Myelophthisis                                           | Diagnosis            | ICD-9-CM         |
| 284.8       | Other specified aplastic anemias                        | Diagnosis            | ICD-9-CM         |
| 284.81      | Red cell aplasia (acquired) (adult) (with thymoma)      | Diagnosis            | ICD-9-CM         |
| 284.89      | Other specified aplastic anemias                        | Diagnosis            | ICD-9-CM         |
| 284.9       | Unspecified aplastic anemia                             | Diagnosis            | ICD-9-CM         |
| 285         | Other and unspecified anemias                           | Diagnosis            | ICD-9-CM         |
| 285.0       | Sideroblastic anemia                                    | Diagnosis            | ICD-9-CM         |
| 285.1       | Acute posthemorrhagic anemia                            | Diagnosis            | ICD-9-CM         |
| 285.2       | Anemia of chronic disease                               | Diagnosis            | ICD-9-CM         |
| 285.21      | Anemia in chronic kidney disease                        | Diagnosis            | ICD-9-CM         |
| 285.22      | Anemia in neoplastic disease                            | Diagnosis            | ICD-9-CM         |
| 285.29      | Anemia of other chronic disease                         | Diagnosis            | ICD-9-CM         |
| 285.3       | Antineoplastic chemotherapy induced anemia              | Diagnosis            | ICD-9-CM         |
| 285.8       | Other specified anemias                                 | Diagnosis            | ICD-9-CM         |
| 285.9       | Unspecified anemia                                      | Diagnosis            | ICD-9-CM         |
| 286         | Coagulation defects                                     | Diagnosis            | ICD-9-CM         |

| <b>Code</b> | <b>Description</b>                                                                     | <b>Code Category</b> | <b>Code Type</b> |
|-------------|----------------------------------------------------------------------------------------|----------------------|------------------|
| 286.0       | Congenital factor VIII disorder                                                        | Diagnosis            | ICD-9-CM         |
| 286.1       | Congenital factor IX disorder                                                          | Diagnosis            | ICD-9-CM         |
| 286.2       | Congenital factor XI deficiency                                                        | Diagnosis            | ICD-9-CM         |
| 286.3       | Congenital deficiency of other clotting factors                                        | Diagnosis            | ICD-9-CM         |
| 286.4       | Von Willebrand's disease                                                               | Diagnosis            | ICD-9-CM         |
| 286.5       | Hemorrhagic disorder due to intrinsic circulating anticoagulants, antibodies or inhibi | Diagnosis            | ICD-9-CM         |
| 286.52      | Acquired hemophilia                                                                    | Diagnosis            | ICD-9-CM         |
| 286.53      | Antiphospholipid antibody with hemorrhagic disorder                                    | Diagnosis            | ICD-9-CM         |
| 286.59      | Other hemorrhagic disorder due to intrinsic circulating anticoagulants, antibodies, o  | Diagnosis            | ICD-9-CM         |
| 286.6       | Defibrination syndrome                                                                 | Diagnosis            | ICD-9-CM         |
| 286.7       | Acquired coagulation factor deficiency                                                 | Diagnosis            | ICD-9-CM         |
| 286.9       | Other and unspecified coagulation defects                                              | Diagnosis            | ICD-9-CM         |
| 287         | Purpura and other hemorrhagic conditions                                               | Diagnosis            | ICD-9-CM         |
| 287.0       | Allergic purpura                                                                       | Diagnosis            | ICD-9-CM         |
| 287.1       | Qualitative platelet defects                                                           | Diagnosis            | ICD-9-CM         |
| 287.2       | Other nonthrombocytopenic purpuras                                                     | Diagnosis            | ICD-9-CM         |
| 287.3       | Primary thrombocytopenia                                                               | Diagnosis            | ICD-9-CM         |
| 287.30      | Primary thrombocytopenia, unspecified                                                  | Diagnosis            | ICD-9-CM         |
| 287.31      | Immune thrombocytopenic purpura                                                        | Diagnosis            | ICD-9-CM         |
| 287.32      | Evans' syndrome                                                                        | Diagnosis            | ICD-9-CM         |
| 287.33      | Congenital and hereditary thrombocytopenic purpura                                     | Diagnosis            | ICD-9-CM         |
| 287.39      | Other primary thrombocytopenia                                                         | Diagnosis            | ICD-9-CM         |
| 287.4       | Secondary thrombocytopenia                                                             | Diagnosis            | ICD-9-CM         |
| 287.41      | Posttransfusion purpura                                                                | Diagnosis            | ICD-9-CM         |
| 287.49      | Other secondary thrombocytopenia                                                       | Diagnosis            | ICD-9-CM         |
| 287.5       | Unspecified thrombocytopenia                                                           | Diagnosis            | ICD-9-CM         |
| 287.8       | Other specified hemorrhagic conditions                                                 | Diagnosis            | ICD-9-CM         |
| 287.9       | Unspecified hemorrhagic conditions                                                     | Diagnosis            | ICD-9-CM         |
| 288         | Diseases of white blood cells                                                          | Diagnosis            | ICD-9-CM         |
| 288.0       | Neutropenia                                                                            | Diagnosis            | ICD-9-CM         |
| 288.00      | Neutropenia, unspecified                                                               | Diagnosis            | ICD-9-CM         |
| 288.01      | Congenital neutropenia                                                                 | Diagnosis            | ICD-9-CM         |
| 288.02      | Cyclic neutropenia                                                                     | Diagnosis            | ICD-9-CM         |
| 288.03      | Drug induced neutropenia                                                               | Diagnosis            | ICD-9-CM         |
| 288.04      | Neutropenia due to infection                                                           | Diagnosis            | ICD-9-CM         |
| 288.09      | Other neutropenia                                                                      | Diagnosis            | ICD-9-CM         |
| 288.1       | Functional disorders of polymorphonuclear neutrophils                                  | Diagnosis            | ICD-9-CM         |
| 288.2       | Genetic anomalies of leukocytes                                                        | Diagnosis            | ICD-9-CM         |
| 288.3       | Eosinophilia                                                                           | Diagnosis            | ICD-9-CM         |
| 288.4       | Hemophagocytic syndromes                                                               | Diagnosis            | ICD-9-CM         |
| 288.5       | Decreased white blood cell count                                                       | Diagnosis            | ICD-9-CM         |
| 288.50      | Leukocytopenia, unspecified                                                            | Diagnosis            | ICD-9-CM         |
| 288.51      | Lymphocytopenia                                                                        | Diagnosis            | ICD-9-CM         |
| 288.59      | Other decreased white blood cell count                                                 | Diagnosis            | ICD-9-CM         |
| 288.66      | Bandemia                                                                               | Diagnosis            | ICD-9-CM         |

| <b>Code</b> | <b>Description</b>                                                                        | <b>Code</b>     | <b>Code Type</b> |
|-------------|-------------------------------------------------------------------------------------------|-----------------|------------------|
|             |                                                                                           | <b>Category</b> |                  |
| 288.69      | Other elevated white blood cell count                                                     | Diagnosis       | ICD-9-CM         |
| 288.8       | Other specified disease of white blood cells                                              | Diagnosis       | ICD-9-CM         |
| 288.9       | Unspecified disease of white blood cells                                                  | Diagnosis       | ICD-9-CM         |
| 289         | Other diseases of blood and blood-forming organs                                          | Diagnosis       | ICD-9-CM         |
| 289.0       | Polycythemia, secondary                                                                   | Diagnosis       | ICD-9-CM         |
| 289.4       | Hypersplenism                                                                             | Diagnosis       | ICD-9-CM         |
| 289.5       | Other diseases of spleen                                                                  | Diagnosis       | ICD-9-CM         |
| 289.50      | Unspecified disease of spleen                                                             | Diagnosis       | ICD-9-CM         |
| 289.51      | Chronic congestive splenomegaly                                                           | Diagnosis       | ICD-9-CM         |
| 289.52      | Splenic sequestration                                                                     | Diagnosis       | ICD-9-CM         |
| 289.53      | Neutropenic splenomegaly                                                                  | Diagnosis       | ICD-9-CM         |
| 289.59      | Other diseases of spleen                                                                  | Diagnosis       | ICD-9-CM         |
| 289.6       | Familial polycythemia                                                                     | Diagnosis       | ICD-9-CM         |
| 289.83      | Myelofibrosis                                                                             | Diagnosis       | ICD-9-CM         |
| 289.84      | Heparin-induced thrombocytopenia [HIT]                                                    | Diagnosis       | ICD-9-CM         |
| 289.89      | Other specified diseases of blood and blood-forming organs                                | Diagnosis       | ICD-9-CM         |
| 289.9       | Unspecified diseases of blood and blood-forming organs                                    | Diagnosis       | ICD-9-CM         |
| D47.4       | Osteomyelofibrosis                                                                        | Diagnosis       | ICD-10-CM        |
| D50.9       | Iron deficiency anemia, unspecified                                                       | Diagnosis       | ICD-10-CM        |
| D51.0       | Vitamin B12 deficiency anemia due to intrinsic factor deficiency                          | Diagnosis       | ICD-10-CM        |
| D51.1       | Vitamin B12 deficiency anemia due to selective vitamin B12 malabsorption with proteinuria | Diagnosis       | ICD-10-CM        |
| D51.2       | Transcobalamin II deficiency                                                              | Diagnosis       | ICD-10-CM        |
| D51.3       | Other dietary vitamin B12 deficiency anemia                                               | Diagnosis       | ICD-10-CM        |
| D51.8       | Other vitamin B12 deficiency anemias                                                      | Diagnosis       | ICD-10-CM        |
| D51.9       | Vitamin B12 deficiency anemia, unspecified                                                | Diagnosis       | ICD-10-CM        |
| D52.0       | Dietary folate deficiency anemia                                                          | Diagnosis       | ICD-10-CM        |
| D52.1       | Drug-induced folate deficiency anemia                                                     | Diagnosis       | ICD-10-CM        |
| D52.8       | Other folate deficiency anemias                                                           | Diagnosis       | ICD-10-CM        |
| D52.9       | Folate deficiency anemia, unspecified                                                     | Diagnosis       | ICD-10-CM        |
| D53.0       | Protein deficiency anemia                                                                 | Diagnosis       | ICD-10-CM        |
| D53.1       | Other megaloblastic anemias, not elsewhere classified                                     | Diagnosis       | ICD-10-CM        |
| D56.0       | Alpha thalassemia                                                                         | Diagnosis       | ICD-10-CM        |
| D56.1       | Beta thalassemia                                                                          | Diagnosis       | ICD-10-CM        |
| D56.2       | Delta-beta thalassemia                                                                    | Diagnosis       | ICD-10-CM        |
| D56.3       | Thalassemia minor                                                                         | Diagnosis       | ICD-10-CM        |
| D56.4       | Hereditary persistence of fetal hemoglobin [HPFH]                                         | Diagnosis       | ICD-10-CM        |
| D56.5       | Hemoglobin E-beta thalassemia                                                             | Diagnosis       | ICD-10-CM        |
| D56.8       | Other thalassemias                                                                        | Diagnosis       | ICD-10-CM        |
| D56.9       | Thalassemia, unspecified                                                                  | Diagnosis       | ICD-10-CM        |
| D57.00      | Hb-SS disease with crisis, unspecified                                                    | Diagnosis       | ICD-10-CM        |
| D57.01      | Hb-SS disease with acute chest syndrome                                                   | Diagnosis       | ICD-10-CM        |
| D57.02      | Hb-SS disease with splenic sequestration                                                  | Diagnosis       | ICD-10-CM        |
| D57.1       | Sickle-cell disease without crisis                                                        | Diagnosis       | ICD-10-CM        |
| D57.20      | Sickle-cell/Hb-C disease without crisis                                                   | Diagnosis       | ICD-10-CM        |

| <b>Code</b> | <b>Description</b>                                                       | <b>Code Category</b> | <b>Code Type</b> |
|-------------|--------------------------------------------------------------------------|----------------------|------------------|
| D57.211     | Sickle-cell/Hb-C disease with acute chest syndrome                       | Diagnosis            | ICD-10-CM        |
| D57.212     | Sickle-cell/Hb-C disease with splenic sequestration                      | Diagnosis            | ICD-10-CM        |
| D57.219     | Sickle-cell/Hb-C disease with crisis, unspecified                        | Diagnosis            | ICD-10-CM        |
| D57.3       | Sickle-cell trait                                                        | Diagnosis            | ICD-10-CM        |
| D57.40      | Sickle-cell thalassemia without crisis                                   | Diagnosis            | ICD-10-CM        |
| D57.411     | Sickle-cell thalassemia with acute chest syndrome                        | Diagnosis            | ICD-10-CM        |
| D57.412     | Sickle-cell thalassemia with splenic sequestration                       | Diagnosis            | ICD-10-CM        |
| D57.419     | Sickle-cell thalassemia with crisis, unspecified                         | Diagnosis            | ICD-10-CM        |
| D57.80      | Other sickle-cell disorders without crisis                               | Diagnosis            | ICD-10-CM        |
| D57.811     | Other sickle-cell disorders with acute chest syndrome                    | Diagnosis            | ICD-10-CM        |
| D57.812     | Other sickle-cell disorders with splenic sequestration                   | Diagnosis            | ICD-10-CM        |
| D57.819     | Other sickle-cell disorders with crisis, unspecified                     | Diagnosis            | ICD-10-CM        |
| D58.0       | Hereditary spherocytosis                                                 | Diagnosis            | ICD-10-CM        |
| D58.1       | Hereditary elliptocytosis                                                | Diagnosis            | ICD-10-CM        |
| D58.2       | Other hemoglobinopathies                                                 | Diagnosis            | ICD-10-CM        |
| D58.8       | Other specified hereditary hemolytic anemias                             | Diagnosis            | ICD-10-CM        |
| D58.9       | Hereditary hemolytic anemia, unspecified                                 | Diagnosis            | ICD-10-CM        |
| D59.0       | Drug-induced autoimmune hemolytic anemia                                 | Diagnosis            | ICD-10-CM        |
| D59.1       | Other autoimmune hemolytic anemias                                       | Diagnosis            | ICD-10-CM        |
| D59.2       | Drug-induced nonautoimmune hemolytic anemia                              | Diagnosis            | ICD-10-CM        |
| D59.3       | Hemolytic-uremic syndrome                                                | Diagnosis            | ICD-10-CM        |
| D59.4       | Other nonautoimmune hemolytic anemias                                    | Diagnosis            | ICD-10-CM        |
| D59.5       | Paroxysmal nocturnal hemoglobinuria [Marchiafava-Micheli]                | Diagnosis            | ICD-10-CM        |
| D59.6       | Hemoglobinuria due to hemolysis from other external causes               | Diagnosis            | ICD-10-CM        |
| D59.8       | Other acquired hemolytic anemias                                         | Diagnosis            | ICD-10-CM        |
| D59.9       | Acquired hemolytic anemia, unspecified                                   | Diagnosis            | ICD-10-CM        |
| D60.0       | Chronic acquired pure red cell aplasia                                   | Diagnosis            | ICD-10-CM        |
| D60.1       | Transient acquired pure red cell aplasia                                 | Diagnosis            | ICD-10-CM        |
| D60.8       | Other acquired pure red cell aplasias                                    | Diagnosis            | ICD-10-CM        |
| D60.9       | Acquired pure red cell aplasia, unspecified                              | Diagnosis            | ICD-10-CM        |
| D61.01      | Constitutional (pure) red blood cell aplasia                             | Diagnosis            | ICD-10-CM        |
| D61.09      | Other constitutional aplastic anemia                                     | Diagnosis            | ICD-10-CM        |
| D61.1       | Drug-induced aplastic anemia                                             | Diagnosis            | ICD-10-CM        |
| D61.2       | Aplastic anemia due to other external agents                             | Diagnosis            | ICD-10-CM        |
| D61.3       | Idiopathic aplastic anemia                                               | Diagnosis            | ICD-10-CM        |
| D61.810     | Antineoplastic chemotherapy induced pancytopenia                         | Diagnosis            | ICD-10-CM        |
| D61.811     | Other drug-induced pancytopenia                                          | Diagnosis            | ICD-10-CM        |
| D61.818     | Other pancytopenia                                                       | Diagnosis            | ICD-10-CM        |
| D61.82      | Myelophthisis                                                            | Diagnosis            | ICD-10-CM        |
| D61.89      | Other specified aplastic anemias and other bone marrow failure syndromes | Diagnosis            | ICD-10-CM        |
| D61.9       | Aplastic anemia, unspecified                                             | Diagnosis            | ICD-10-CM        |
| D62         | Acute posthemorrhagic anemia                                             | Diagnosis            | ICD-10-CM        |
| D63.0       | Anemia in neoplastic disease                                             | Diagnosis            | ICD-10-CM        |
| D63.1       | Anemia in chronic kidney disease                                         | Diagnosis            | ICD-10-CM        |
| D63.8       | Anemia in other chronic diseases classified elsewhere                    | Diagnosis            | ICD-10-CM        |

| <b>Code</b> | <b>Description</b>                                                                                | <b>Code Category</b> | <b>Code Type</b> |
|-------------|---------------------------------------------------------------------------------------------------|----------------------|------------------|
| D64.0       | Hereditary sideroblastic anemia                                                                   | Diagnosis            | ICD-10-CM        |
| D64.1       | Secondary sideroblastic anemia due to disease                                                     | Diagnosis            | ICD-10-CM        |
| D64.2       | Secondary sideroblastic anemia due to drugs and toxins                                            | Diagnosis            | ICD-10-CM        |
| D64.3       | Other sideroblastic anemias                                                                       | Diagnosis            | ICD-10-CM        |
| D64.4       | Congenital dyserythropoietic anemia                                                               | Diagnosis            | ICD-10-CM        |
| D64.81      | Anemia due to antineoplastic chemotherapy                                                         | Diagnosis            | ICD-10-CM        |
| D64.89      | Other specified anemias                                                                           | Diagnosis            | ICD-10-CM        |
| D64.9       | Anemia, unspecified                                                                               | Diagnosis            | ICD-10-CM        |
| D65         | Disseminated intravascular coagulation [defibrination syndrome]                                   | Diagnosis            | ICD-10-CM        |
| D66         | Hereditary factor VIII deficiency                                                                 | Diagnosis            | ICD-10-CM        |
| D67         | Hereditary factor IX deficiency                                                                   | Diagnosis            | ICD-10-CM        |
| D68.0       | Von Willebrand's disease                                                                          | Diagnosis            | ICD-10-CM        |
| D68.1       | Hereditary factor XI deficiency                                                                   | Diagnosis            | ICD-10-CM        |
| D68.2       | Hereditary deficiency of other clotting factors                                                   | Diagnosis            | ICD-10-CM        |
| D68.311     | Acquired hemophilia                                                                               | Diagnosis            | ICD-10-CM        |
| D68.312     | Antiphospholipid antibody with hemorrhagic disorder                                               | Diagnosis            | ICD-10-CM        |
| D68.318     | Other hemorrhagic disorder due to intrinsic circulating anticoagulants, antibodies, or inhibitors | Diagnosis            | ICD-10-CM        |
| D68.32      | Hemorrhagic disorder due to extrinsic circulating anticoagulants                                  | Diagnosis            | ICD-10-CM        |
| D68.4       | Acquired coagulation factor deficiency                                                            | Diagnosis            | ICD-10-CM        |
| D68.51      | Activated protein C resistance                                                                    | Diagnosis            | ICD-10-CM        |
| D68.52      | Prothrombin gene mutation                                                                         | Diagnosis            | ICD-10-CM        |
| D68.59      | Other primary thrombophilia                                                                       | Diagnosis            | ICD-10-CM        |
| D68.61      | Antiphospholipid syndrome                                                                         | Diagnosis            | ICD-10-CM        |
| D68.62      | Lupus anticoagulant syndrome                                                                      | Diagnosis            | ICD-10-CM        |
| D68.69      | Other thrombophilia                                                                               | Diagnosis            | ICD-10-CM        |
| D68.8       | Other specified coagulation defects                                                               | Diagnosis            | ICD-10-CM        |
| D68.9       | Coagulation defect, unspecified                                                                   | Diagnosis            | ICD-10-CM        |
| D69.2       | Other nonthrombocytopenic purpura                                                                 | Diagnosis            | ICD-10-CM        |
| D69.3       | Immune thrombocytopenic purpura                                                                   | Diagnosis            | ICD-10-CM        |
| D69.41      | Evans syndrome                                                                                    | Diagnosis            | ICD-10-CM        |
| D69.42      | Congenital and hereditary thrombocytopenia purpura                                                | Diagnosis            | ICD-10-CM        |
| D69.49      | Other primary thrombocytopenia                                                                    | Diagnosis            | ICD-10-CM        |
| D69.51      | Posttransfusion purpura                                                                           | Diagnosis            | ICD-10-CM        |
| D69.59      | Other secondary thrombocytopenia                                                                  | Diagnosis            | ICD-10-CM        |
| D69.6       | Thrombocytopenia, unspecified                                                                     | Diagnosis            | ICD-10-CM        |
| D69.8       | Other specified hemorrhagic conditions                                                            | Diagnosis            | ICD-10-CM        |
| D69.9       | Hemorrhagic condition, unspecified                                                                | Diagnosis            | ICD-10-CM        |
| D70.0       | Congenital agranulocytosis                                                                        | Diagnosis            | ICD-10-CM        |
| D70.1       | Agranulocytosis secondary to cancer chemotherapy                                                  | Diagnosis            | ICD-10-CM        |
| D70.2       | Other drug-induced agranulocytosis                                                                | Diagnosis            | ICD-10-CM        |
| D70.3       | Neutropenia due to infection                                                                      | Diagnosis            | ICD-10-CM        |
| D70.4       | Cyclic neutropenia                                                                                | Diagnosis            | ICD-10-CM        |
| D70.8       | Other neutropenia                                                                                 | Diagnosis            | ICD-10-CM        |
| D70.9       | Neutropenia, unspecified                                                                          | Diagnosis            | ICD-10-CM        |

| <b>Code</b>                               | <b>Description</b>                                                                 | <b>Code Category</b> | <b>Code Type</b> |
|-------------------------------------------|------------------------------------------------------------------------------------|----------------------|------------------|
| D71                                       | Functional disorders of polymorphonuclear neutrophils                              | Diagnosis            | ICD-10-CM        |
| D72.0                                     | Genetic anomalies of leukocytes                                                    | Diagnosis            | ICD-10-CM        |
| D72.810                                   | Lymphocytopenia                                                                    | Diagnosis            | ICD-10-CM        |
| D72.818                                   | Other decreased white blood cell count                                             | Diagnosis            | ICD-10-CM        |
| D72.819                                   | Decreased white blood cell count, unspecified                                      | Diagnosis            | ICD-10-CM        |
| D72.825                                   | Bandemia                                                                           | Diagnosis            | ICD-10-CM        |
| D72.828                                   | Other elevated white blood cell count                                              | Diagnosis            | ICD-10-CM        |
| D72.829                                   | Elevated white blood cell count, unspecified                                       | Diagnosis            | ICD-10-CM        |
| D72.89                                    | Other specified disorders of white blood cells                                     | Diagnosis            | ICD-10-CM        |
| D72.9                                     | Disorder of white blood cells, unspecified                                         | Diagnosis            | ICD-10-CM        |
| D73.0                                     | Hyposplenism                                                                       | Diagnosis            | ICD-10-CM        |
| D73.1                                     | Hypersplenism                                                                      | Diagnosis            | ICD-10-CM        |
| D73.2                                     | Chronic congestive splenomegaly                                                    | Diagnosis            | ICD-10-CM        |
| D73.81                                    | Neutropenic splenomegaly                                                           | Diagnosis            | ICD-10-CM        |
| D73.89                                    | Other diseases of spleen                                                           | Diagnosis            | ICD-10-CM        |
| D73.9                                     | Disease of spleen, unspecified                                                     | Diagnosis            | ICD-10-CM        |
| D75.81                                    | Myelofibrosis                                                                      | Diagnosis            | ICD-10-CM        |
| D75.82                                    | Heparin induced thrombocytopenia (HIT)                                             | Diagnosis            | ICD-10-CM        |
| D75.89                                    | Other specified diseases of blood and blood-forming organs                         | Diagnosis            | ICD-10-CM        |
| D75.9                                     | Disease of blood and blood-forming organs, unspecified                             | Diagnosis            | ICD-10-CM        |
| D76.1                                     | Hemophagocytic lymphohistiocytosis                                                 | Diagnosis            | ICD-10-CM        |
| D76.2                                     | Hemophagocytic syndrome, infection-associated                                      | Diagnosis            | ICD-10-CM        |
| D76.3                                     | Other histiocytosis syndromes                                                      | Diagnosis            | ICD-10-CM        |
| D77                                       | Other disorders of blood and blood-forming organs in diseases classified elsewhere | Diagnosis            | ICD-10-CM        |
| D89.2                                     | Hypergammaglobulinemia, unspecified                                                | Diagnosis            | ICD-10-CM        |
| <b>Sickle Cell Disease or Thalassemia</b> |                                                                                    |                      |                  |
| D57                                       | Sickle-cell disorders                                                              | Diagnosis            | ICD-10-CM        |
| D57.0                                     | Hb-SS disease with crisis                                                          | Diagnosis            | ICD-10-CM        |
| D57.00                                    | Hb-SS disease with crisis, unspecified                                             | Diagnosis            | ICD-10-CM        |
| D57.01                                    | Hb-SS disease with acute chest syndrome                                            | Diagnosis            | ICD-10-CM        |
| D57.02                                    | Hb-SS disease with splenic sequestration                                           | Diagnosis            | ICD-10-CM        |
| D57.1                                     | Sickle-cell disease without crisis                                                 | Diagnosis            | ICD-10-CM        |
| D57.2                                     | Sickle-cell/Hb-C disease                                                           | Diagnosis            | ICD-10-CM        |
| D57.20                                    | Sickle-cell/Hb-C disease without crisis                                            | Diagnosis            | ICD-10-CM        |
| D57.21                                    | Sickle-cell/Hb-C disease with crisis                                               | Diagnosis            | ICD-10-CM        |
| D57.211                                   | Sickle-cell/Hb-C disease with acute chest syndrome                                 | Diagnosis            | ICD-10-CM        |
| D57.212                                   | Sickle-cell/Hb-C disease with splenic sequestration                                | Diagnosis            | ICD-10-CM        |
| D57.219                                   | Sickle-cell/Hb-C disease with crisis, unspecified                                  | Diagnosis            | ICD-10-CM        |
| D57.3                                     | Sickle-cell trait                                                                  | Diagnosis            | ICD-10-CM        |
| D57.4                                     | Sickle-cell thalassemia                                                            | Diagnosis            | ICD-10-CM        |
| D57.40                                    | Sickle-cell thalassemia without crisis                                             | Diagnosis            | ICD-10-CM        |
| D57.41                                    | Sickle-cell thalassemia with crisis                                                | Diagnosis            | ICD-10-CM        |
| D57.411                                   | Sickle-cell thalassemia with acute chest syndrome                                  | Diagnosis            | ICD-10-CM        |
| D57.412                                   | Sickle-cell thalassemia with splenic sequestration                                 | Diagnosis            | ICD-10-CM        |
| D57.419                                   | Sickle-cell thalassemia with crisis, unspecified                                   | Diagnosis            | ICD-10-CM        |

| <b>Code</b>                     | <b>Description</b>                                                              | <b>Code Category</b> | <b>Code Type</b> |
|---------------------------------|---------------------------------------------------------------------------------|----------------------|------------------|
| D57.8                           | Other sickle-cell disorders                                                     | Diagnosis            | ICD-10-CM        |
| D57.80                          | Other sickle-cell disorders without crisis                                      | Diagnosis            | ICD-10-CM        |
| D57.81                          | Other sickle-cell disorders with crisis                                         | Diagnosis            | ICD-10-CM        |
| D57.811                         | Other sickle-cell disorders with acute chest syndrome                           | Diagnosis            | ICD-10-CM        |
| D57.812                         | Other sickle-cell disorders with splenic sequestration                          | Diagnosis            | ICD-10-CM        |
| D57.819                         | Other sickle-cell disorders with crisis, unspecified                            | Diagnosis            | ICD-10-CM        |
| D56.0                           | Alpha thalassemia                                                               | Diagnosis            | ICD-10-CM        |
| D56.1                           | Beta thalassemia                                                                | Diagnosis            | ICD-10-CM        |
| D56.2                           | Delta-beta thalassemia                                                          | Diagnosis            | ICD-10-CM        |
| D56.3                           | Thalassemia minor                                                               | Diagnosis            | ICD-10-CM        |
| D56.4                           | Hereditary persistence of fetal hemoglobin [HPFH]                               | Diagnosis            | ICD-10-CM        |
| D56.5                           | Hemoglobin E-beta thalassemia                                                   | Diagnosis            | ICD-10-CM        |
| D56.8                           | Other thalassemias                                                              | Diagnosis            | ICD-10-CM        |
| D56.9                           | Thalassemia, unspecified                                                        | Diagnosis            | ICD-10-CM        |
| <b>Mental Health Conditions</b> |                                                                                 |                      |                  |
| F33.8                           | Other recurrent depressive disorders                                            | Diagnosis            | ICD-10-CM        |
| F43.21                          | Adjustment disorder with depressed mood                                         | Diagnosis            | ICD-10-CM        |
| F34.1                           | Dysthymic disorder                                                              | Diagnosis            | ICD-10-CM        |
| F43.23                          | Adjustment disorder with mixed anxiety and depressed mood                       | Diagnosis            | ICD-10-CM        |
| F33.2                           | Major depressive disorder, recurrent severe without psychotic features          | Diagnosis            | ICD-10-CM        |
| F33.42                          | Major depressive disorder, recurrent, in full remission                         | Diagnosis            | ICD-10-CM        |
| F33.41                          | Major depressive disorder, recurrent, in partial remission                      | Diagnosis            | ICD-10-CM        |
| F33.40                          | Major depressive disorder, recurrent, in remission, unspecified                 | Diagnosis            | ICD-10-CM        |
| F33.0                           | Major depressive disorder, recurrent, mild                                      | Diagnosis            | ICD-10-CM        |
| F33.1                           | Major depressive disorder, recurrent, moderate                                  | Diagnosis            | ICD-10-CM        |
| F33.3                           | Major depressive disorder, recurrent, severe with psychotic symptoms            | Diagnosis            | ICD-10-CM        |
| F33.9                           | Major depressive disorder, recurrent, unspecified                               | Diagnosis            | ICD-10-CM        |
| F32.5                           | Major depressive disorder, single episode, in full remission                    | Diagnosis            | ICD-10-CM        |
| F32.4                           | Major depressive disorder, single episode, in partial remission                 | Diagnosis            | ICD-10-CM        |
| F32.0                           | Major depressive disorder, single episode, mild                                 | Diagnosis            | ICD-10-CM        |
| F32.1                           | Major depressive disorder, single episode, moderate                             | Diagnosis            | ICD-10-CM        |
| F32.3                           | Major depressive disorder, single episode, severe with psychotic features       | Diagnosis            | ICD-10-CM        |
| F32.2                           | Major depressive disorder, single episode, severe without psychotic features    | Diagnosis            | ICD-10-CM        |
| F32.9                           | Major depressive disorder, single episode, unspecified                          | Diagnosis            | ICD-10-CM        |
| F31.31                          | Bipolar disorder, current episode depressed, mild                               | Diagnosis            | ICD-10-CM        |
| F31.30                          | Bipolar disorder, current episode depressed, mild or moderate severity,         | Diagnosis            | ICD-10-CM        |
| F31.32                          | Bipolar disorder, current episode depressed, moderate                           | Diagnosis            | ICD-10-CM        |
| F31.5                           | Bipolar disorder, current episode depressed, severe, with psychotic features    | Diagnosis            | ICD-10-CM        |
| F31.4                           | Bipolar disorder, current episode depressed, severe, without psychotic features | Diagnosis            | ICD-10-CM        |
| F31.61                          | Bipolar disorder, current episode mixed, mild                                   | Diagnosis            | ICD-10-CM        |
| F31.62                          | Bipolar disorder, current episode mixed, moderate                               | Diagnosis            | ICD-10-CM        |
| F31.64                          | Bipolar disorder, current episode mixed, severe, with psychotic features        | Diagnosis            | ICD-10-CM        |
| F31.63                          | Bipolar disorder, current episode mixed, severe, without psychotic features     | Diagnosis            | ICD-10-CM        |
| F31.60                          | Bipolar disorder, current episode mixed, unspecified                            | Diagnosis            | ICD-10-CM        |
| F31.76                          | Bipolar disorder, in full remission, most recent episode depressed              | Diagnosis            | ICD-10-CM        |

| <b>Code</b>                      | <b>Description</b>                                                    | <b>Code Category</b> | <b>Code Type</b> |
|----------------------------------|-----------------------------------------------------------------------|----------------------|------------------|
| F31.78                           | Bipolar disorder, in full remission, most recent episode mixed        | Diagnosis            | ICD-10-CM        |
| F31.75                           | Bipolar disorder, in partial remission, most recent episode depressed | Diagnosis            | ICD-10-CM        |
| F31.77                           | Bipolar disorder, in partial remission, most recent episode mixed     | Diagnosis            | ICD-10-CM        |
| F31.81                           | Bipolar II disorder                                                   | Diagnosis            | ICD-10-CM        |
| <b>Down Syndrome</b>             |                                                                       |                      |                  |
| Q90                              | Down syndrome                                                         | Diagnosis            | ICD-10-CM        |
| Q90.0                            | Trisomy 21, nonmosaic (meiotic nondisjunction)                        | Diagnosis            | ICD-10-CM        |
| Q90.1                            | Trisomy 21, mosaicism (mitotic nondisjunction)                        | Diagnosis            | ICD-10-CM        |
| Q90.2                            | Trisomy 21, translocation                                             | Diagnosis            | ICD-10-CM        |
| Q90.9                            | Down syndrome, unspecified                                            | Diagnosis            | ICD-10-CM        |
| <b>Liver and Renal Disorders</b> |                                                                       |                      |                  |
| B18                              | Chronic viral hepatitis                                               | Diagnosis            | ICD-10-CM        |
| B18.0                            | Chronic viral hepatitis B with delta-agent                            | Diagnosis            | ICD-10-CM        |
| B18.1                            | Chronic viral hepatitis B without delta-agent                         | Diagnosis            | ICD-10-CM        |
| B18.2                            | Chronic viral hepatitis C                                             | Diagnosis            | ICD-10-CM        |
| B18.8                            | Other chronic viral hepatitis                                         | Diagnosis            | ICD-10-CM        |
| B18.9                            | Chronic viral hepatitis, unspecified                                  | Diagnosis            | ICD-10-CM        |
| I85.0                            | Esophageal varices                                                    | Diagnosis            | ICD-10-CM        |
| I85.00                           | Esophageal varices without bleeding                                   | Diagnosis            | ICD-10-CM        |
| I85.01                           | Esophageal varices with bleeding                                      | Diagnosis            | ICD-10-CM        |
| I86.4                            | Gastric varices                                                       | Diagnosis            | ICD-10-CM        |
| K70.0                            | Alcoholic fatty liver                                                 | Diagnosis            | ICD-10-CM        |
| K70.1                            | Alcoholic hepatitis                                                   | Diagnosis            | ICD-10-CM        |
| K70.10                           | Alcoholic hepatitis without ascites                                   | Diagnosis            | ICD-10-CM        |
| K70.11                           | Alcoholic hepatitis with ascites                                      | Diagnosis            | ICD-10-CM        |
| K70.2                            | Alcoholic fibrosis and sclerosis of liver                             | Diagnosis            | ICD-10-CM        |
| K70.3                            | Alcoholic cirrhosis of liver                                          | Diagnosis            | ICD-10-CM        |
| K70.30                           | Alcoholic cirrhosis of liver without ascites                          | Diagnosis            | ICD-10-CM        |
| K70.31                           | Alcoholic cirrhosis of liver with ascites                             | Diagnosis            | ICD-10-CM        |
| K70.4                            | Alcoholic hepatic failure                                             | Diagnosis            | ICD-10-CM        |
| K70.40                           | Alcoholic hepatic failure without coma                                | Diagnosis            | ICD-10-CM        |
| K70.41                           | Alcoholic hepatic failure with coma                                   | Diagnosis            | ICD-10-CM        |
| K70.9                            | Alcoholic liver disease, unspecified                                  | Diagnosis            | ICD-10-CM        |
| K71.1                            | Toxic liver disease with hepatic necrosis                             | Diagnosis            | ICD-10-CM        |
| K71.10                           | Toxic liver disease with hepatic necrosis, without coma               | Diagnosis            | ICD-10-CM        |
| K71.11                           | Toxic liver disease with hepatic necrosis, with coma                  | Diagnosis            | ICD-10-CM        |
| K71.3                            | Toxic liver disease with chronic persistent hepatitis                 | Diagnosis            | ICD-10-CM        |
| K71.4                            | Toxic liver disease with chronic lobular hepatitis                    | Diagnosis            | ICD-10-CM        |
| K71.5                            | Toxic liver disease with chronic active hepatitis                     | Diagnosis            | ICD-10-CM        |
| K71.50                           | Toxic liver disease with chronic active hepatitis without ascites     | Diagnosis            | ICD-10-CM        |
| K71.51                           | Toxic liver disease with chronic active hepatitis with ascites        | Diagnosis            | ICD-10-CM        |
| K71.7                            | Toxic liver disease with fibrosis and cirrhosis of liver              | Diagnosis            | ICD-10-CM        |
| K72.1                            | Chronic hepatic failure                                               | Diagnosis            | ICD-10-CM        |
| K72.10                           | Chronic hepatic failure without coma                                  | Diagnosis            | ICD-10-CM        |
| K72.11                           | Chronic hepatic failure with coma                                     | Diagnosis            | ICD-10-CM        |



| <b>Code</b> | <b>Description</b>                                           | <b>Code Category</b> | <b>Code Type</b> |
|-------------|--------------------------------------------------------------|----------------------|------------------|
| K72.9       | Hepatic failure, unspecified                                 | Diagnosis            | ICD-10-CM        |
| K72.90      | Hepatic failure, unspecified without coma                    | Diagnosis            | ICD-10-CM        |
| K72.91      | Hepatic failure, unspecified with coma                       | Diagnosis            | ICD-10-CM        |
| K73         | Chronic hepatitis, not elsewhere classified                  | Diagnosis            | ICD-10-CM        |
| K73.0       | Chronic persistent hepatitis, not elsewhere classified       | Diagnosis            | ICD-10-CM        |
| K73.1       | Chronic lobular hepatitis, not elsewhere classified          | Diagnosis            | ICD-10-CM        |
| K73.2       | Chronic active hepatitis, not elsewhere classified           | Diagnosis            | ICD-10-CM        |
| K73.8       | Other chronic hepatitis, not elsewhere classified            | Diagnosis            | ICD-10-CM        |
| K73.9       | Chronic hepatitis, unspecified                               | Diagnosis            | ICD-10-CM        |
| K74         | Fibrosis and cirrhosis of liver                              | Diagnosis            | ICD-10-CM        |
| K74.0       | Hepatic fibrosis                                             | Diagnosis            | ICD-10-CM        |
| K74.1       | Hepatic sclerosis                                            | Diagnosis            | ICD-10-CM        |
| K74.2       | Hepatic fibrosis with hepatic sclerosis                      | Diagnosis            | ICD-10-CM        |
| K74.3       | Primary biliary cirrhosis                                    | Diagnosis            | ICD-10-CM        |
| K74.4       | Secondary biliary cirrhosis                                  | Diagnosis            | ICD-10-CM        |
| K74.5       | Biliary cirrhosis, unspecified                               | Diagnosis            | ICD-10-CM        |
| K74.6       | Other and unspecified cirrhosis of liver                     | Diagnosis            | ICD-10-CM        |
| K74.60      | Unspecified cirrhosis of liver                               | Diagnosis            | ICD-10-CM        |
| K74.69      | Other cirrhosis of liver                                     | Diagnosis            | ICD-10-CM        |
| K76.0       | Fatty (change of) liver, not elsewhere classified            | Diagnosis            | ICD-10-CM        |
| K76.2       | Central hemorrhagic necrosis of liver                        | Diagnosis            | ICD-10-CM        |
| K76.3       | Infarction of liver                                          | Diagnosis            | ICD-10-CM        |
| K76.4       | Peliosis hepatis                                             | Diagnosis            | ICD-10-CM        |
| K76.5       | Hepatic veno-occlusive disease                               | Diagnosis            | ICD-10-CM        |
| K76.6       | Portal hypertension                                          | Diagnosis            | ICD-10-CM        |
| K76.7       | Hepatorenal syndrome                                         | Diagnosis            | ICD-10-CM        |
| K76.8       | Other specified diseases of liver                            | Diagnosis            | ICD-10-CM        |
| K76.81      | Hepatopulmonary syndrome                                     | Diagnosis            | ICD-10-CM        |
| K76.89      | Other specified diseases of liver                            | Diagnosis            | ICD-10-CM        |
| K76.9       | Liver disease, unspecified                                   | Diagnosis            | ICD-10-CM        |
| Z94.4       | Liver transplant status                                      | Diagnosis            | ICD-10-CM        |
| K71.0       | Toxic liver disease with cholestasis                         | Diagnosis            | ICD-10-CM        |
| K71.2       | Toxic liver disease with acute hepatitis                     | Diagnosis            | ICD-10-CM        |
| K71.6       | Toxic liver disease with hepatitis, not elsewhere classified | Diagnosis            | ICD-10-CM        |
| K71.8       | Toxic liver disease with other disorders of liver            | Diagnosis            | ICD-10-CM        |
| K71.9       | Toxic liver disease, unspecified                             | Diagnosis            | ICD-10-CM        |
| K75.0       | Abscess of liver                                             | Diagnosis            | ICD-10-CM        |
| K75.1       | Phlebitis of portal vein                                     | Diagnosis            | ICD-10-CM        |
| K75.2       | Nonspecific reactive hepatitis                               | Diagnosis            | ICD-10-CM        |
| K75.3       | Granulomatous hepatitis, not elsewhere classified            | Diagnosis            | ICD-10-CM        |
| K75.4       | Autoimmune hepatitis                                         | Diagnosis            | ICD-10-CM        |
| K75.8       | Other specified inflammatory liver diseases                  | Diagnosis            | ICD-10-CM        |
| K75.81      | Nonalcoholic steatohepatitis (NASH)                          | Diagnosis            | ICD-10-CM        |
| K75.89      | Other specified inflammatory liver diseases                  | Diagnosis            | ICD-10-CM        |
| K75.9       | Inflammatory liver disease, unspecified                      | Diagnosis            | ICD-10-CM        |

| <b>Code</b> | <b>Description</b>                                                                                             | <b>Code Category</b> | <b>Code Type</b> |
|-------------|----------------------------------------------------------------------------------------------------------------|----------------------|------------------|
| K76.1       | Chronic passive congestion of liver                                                                            | Diagnosis            | ICD-10-CM        |
| E83.01      | Wilson's disease                                                                                               | Diagnosis            | ICD-10-CM        |
| E88.01      | Alpha-1-antitrypsin deficiency                                                                                 | Diagnosis            | ICD-10-CM        |
| K83.01      | Primary sclerosing cholangitis                                                                                 | Diagnosis            | ICD-10-CM        |
| E83.110     | Hereditary hemochromatosis                                                                                     | Diagnosis            | ICD-10-CM        |
| R18         | Ascites                                                                                                        | Diagnosis            | ICD-10-CM        |
| R18.8       | Other ascites                                                                                                  | Diagnosis            | ICD-10-CM        |
| K65.2       | Spontaneous bacterial peritonitis                                                                              | Diagnosis            | ICD-10-CM        |
| K72.01      | Acute and subacute hepatic failure with coma                                                                   | Diagnosis            | ICD-10-CM        |
| K91.83      | Postprocedural hepatorenal syndrome                                                                            | Diagnosis            | ICD-10-CM        |
| I85         | Esophageal varices                                                                                             | Diagnosis            | ICD-10-CM        |
| I85.1       | Secondary esophageal varices                                                                                   | Diagnosis            | ICD-10-CM        |
| I85.10      | Secondary esophageal varices without bleeding                                                                  | Diagnosis            | ICD-10-CM        |
| I85.11      | Secondary esophageal varices with bleeding                                                                     | Diagnosis            | ICD-10-CM        |
| 580         | Acute glomerulonephritis                                                                                       | Diagnosis            | ICD-9-CM         |
| 580.0       | Acute glomerulonephritis with lesion of proliferative glomerulonephritis                                       | Diagnosis            | ICD-9-CM         |
| 580.4       | Acute glomerulonephritis with lesion of rapidly progressive glomerulonephritis                                 | Diagnosis            | ICD-9-CM         |
| 580.8       | Acute glomerulonephritis with other specified pathological lesion in kidney                                    | Diagnosis            | ICD-9-CM         |
| 580.81      | Acute glomerulonephritis with other specified pathological lesion in kidney in disease classified elsewhere    | Diagnosis            | ICD-9-CM         |
| 580.89      | Other acute glomerulonephritis with other specified pathological lesion in kidney                              | Diagnosis            | ICD-9-CM         |
| 580.9       | Acute glomerulonephritis with unspecified pathological lesion in kidney                                        | Diagnosis            | ICD-9-CM         |
| 581         | Nephrotic syndrome                                                                                             | Diagnosis            | ICD-9-CM         |
| 581.0       | Nephrotic syndrome with lesion of proliferative glomerulonephritis                                             | Diagnosis            | ICD-9-CM         |
| 581.1       | Nephrotic syndrome with lesion of membranous glomerulonephritis                                                | Diagnosis            | ICD-9-CM         |
| 581.2       | Nephrotic syndrome with lesion of membranoproliferative glomerulonephritis                                     | Diagnosis            | ICD-9-CM         |
| 581.3       | Nephrotic syndrome with lesion of minimal change glomerulonephritis                                            | Diagnosis            | ICD-9-CM         |
| 581.8       | Nephrotic syndrome with other specified pathological lesion in kidney                                          | Diagnosis            | ICD-9-CM         |
| 581.81      | Nephrotic syndrome with other specified pathological lesion in kidney in diseases classified elsewhere         | Diagnosis            | ICD-9-CM         |
| 581.89      | Other nephrotic syndrome with specified pathological lesion in kidney                                          | Diagnosis            | ICD-9-CM         |
| 581.9       | Nephrotic syndrome with unspecified pathological lesion in kidney                                              | Diagnosis            | ICD-9-CM         |
| 582         | Chronic glomerulonephritis                                                                                     | Diagnosis            | ICD-9-CM         |
| 582.0       | Chronic glomerulonephritis with lesion of proliferative glomerulonephritis                                     | Diagnosis            | ICD-9-CM         |
| 582.1       | Chronic glomerulonephritis with lesion of membranous glomerulonephritis                                        | Diagnosis            | ICD-9-CM         |
| 582.2       | Chronic glomerulonephritis with lesion of membranoproliferative glomerulonephritis                             | Diagnosis            | ICD-9-CM         |
| 582.4       | Chronic glomerulonephritis with lesion of rapidly progressive glomerulonephritis                               | Diagnosis            | ICD-9-CM         |
| 582.8       | Chronic glomerulonephritis with other specified pathological lesion in kidney                                  | Diagnosis            | ICD-9-CM         |
| 582.81      | Chronic glomerulonephritis with other specified pathological lesion in kidney in diseases classified elsewhere | Diagnosis            | ICD-9-CM         |
| 582.89      | Other chronic glomerulonephritis with specified pathological lesion in kidney                                  | Diagnosis            | ICD-9-CM         |
| 582.9       | Chronic glomerulonephritis with unspecified pathological lesion in kidney                                      | Diagnosis            | ICD-9-CM         |
| 583         | Nephritis and nephropathy, not specified as acute or chronic                                                   | Diagnosis            | ICD-9-CM         |

| Code   | Description                                                                                                                                        | Code      |           |
|--------|----------------------------------------------------------------------------------------------------------------------------------------------------|-----------|-----------|
|        |                                                                                                                                                    | Category  | Code Type |
| 583.0  | Nephritis and nephropathy, not specified as acute or chronic, with lesion of proliferative glomerulonephritis                                      | Diagnosis | ICD-9-CM  |
| 583.1  | Nephritis and nephropathy, not specified as acute or chronic, with lesion of membranous glomerulonephritis                                         | Diagnosis | ICD-9-CM  |
| 583.2  | Nephritis and nephropathy, not specified as acute or chronic, with lesion of membranoproliferative glomerulonephritis                              | Diagnosis | ICD-9-CM  |
| 583.4  | Nephritis and nephropathy, not specified as acute or chronic, with lesion of rapidly progressive glomerulonephritis                                | Diagnosis | ICD-9-CM  |
| 583.6  | Nephritis and nephropathy, not specified as acute or chronic, with lesion of renal cortical necrosis                                               | Diagnosis | ICD-9-CM  |
| 583.7  | Nephritis and nephropathy, not specified as acute or chronic, with lesion of renal medullary necrosis                                              | Diagnosis | ICD-9-CM  |
| 583.8  | Nephritis and nephropathy, not specified as acute or chronic, with other specified pathological lesion in kidney                                   | Diagnosis | ICD-9-CM  |
| 583.81 | Nephritis and nephropathy, not specified as acute or chronic, with other specified pathological lesion in kidney, in diseases classified elsewhere | Diagnosis | ICD-9-CM  |
| 583.89 | Other nephritis and nephropathy, not specified as acute or chronic, with specified pathological lesion in kidney                                   | Diagnosis | ICD-9-CM  |
| 583.9  | Nephritis and nephropathy, not specified as acute or chronic, with unspecified pathological lesion in kidney                                       | Diagnosis | ICD-9-CM  |
| 584    | Acute kidney failure                                                                                                                               | Diagnosis | ICD-9-CM  |
| 584.5  | Acute kidney failure with lesion of tubular necrosis                                                                                               | Diagnosis | ICD-9-CM  |
| 584.6  | Acute kidney failure with lesion of renal cortical necrosis                                                                                        | Diagnosis | ICD-9-CM  |
| 584.7  | Acute kidney failure with lesion of medullary [papillary] necrosis                                                                                 | Diagnosis | ICD-9-CM  |
| 584.8  | Acute kidney failure with other specified pathological lesion in kidney                                                                            | Diagnosis | ICD-9-CM  |
| 584.9  | Acute kidney failure, unspecified                                                                                                                  | Diagnosis | ICD-9-CM  |
| 585    | Chronic kidney disease (CKD)                                                                                                                       | Diagnosis | ICD-9-CM  |
| 585.1  | Chronic kidney disease, Stage I                                                                                                                    | Diagnosis | ICD-9-CM  |
| 585.2  | Chronic kidney disease, Stage II (mild)                                                                                                            | Diagnosis | ICD-9-CM  |
| 585.3  | Chronic kidney disease, Stage III (moderate)                                                                                                       | Diagnosis | ICD-9-CM  |
| 585.4  | Chronic kidney disease, Stage IV (severe)                                                                                                          | Diagnosis | ICD-9-CM  |
| 585.5  | Chronic kidney disease, Stage V                                                                                                                    | Diagnosis | ICD-9-CM  |
| 585.6  | End stage renal disease                                                                                                                            | Diagnosis | ICD-9-CM  |
| 585.9  | Chronic kidney disease, unspecified                                                                                                                | Diagnosis | ICD-9-CM  |
| 586    | Unspecified renal failure                                                                                                                          | Diagnosis | ICD-9-CM  |
| 587    | Unspecified renal sclerosis                                                                                                                        | Diagnosis | ICD-9-CM  |
| 588    | Disorders resulting from impaired renal function                                                                                                   | Diagnosis | ICD-9-CM  |
| 588.0  | Renal osteodystrophy                                                                                                                               | Diagnosis | ICD-9-CM  |
| 588.1  | Nephrogenic diabetes insipidus                                                                                                                     | Diagnosis | ICD-9-CM  |
| 588.8  | Other specified disorder resulting from impaired renal function                                                                                    | Diagnosis | ICD-9-CM  |
| 588.89 | Other specified disorders resulting from impaired renal function                                                                                   | Diagnosis | ICD-9-CM  |
| 588.9  | Unspecified disorder resulting from impaired renal function                                                                                        | Diagnosis | ICD-9-CM  |
| 590    | Infections of kidney                                                                                                                               | Diagnosis | ICD-9-CM  |
| 590.0  | Chronic pyelonephritis                                                                                                                             | Diagnosis | ICD-9-CM  |
| 590.00 | Chronic pyelonephritis without lesion of renal medullary necrosis                                                                                  | Diagnosis | ICD-9-CM  |

| <b>Code</b> | <b>Description</b>                                                                   | <b>Code Category</b> | <b>Code Type</b> |
|-------------|--------------------------------------------------------------------------------------|----------------------|------------------|
| 590.01      | Chronic pyelonephritis with lesion of renal medullary necrosis                       | Diagnosis            | ICD-9-CM         |
| 590.1       | Acute pyelonephritis                                                                 | Diagnosis            | ICD-9-CM         |
| 590.10      | Acute pyelonephritis without lesion of renal medullary necrosis                      | Diagnosis            | ICD-9-CM         |
| 590.11      | Acute pyelonephritis with lesion of renal medullary necrosis                         | Diagnosis            | ICD-9-CM         |
| 590.2       | Renal and perinephric abscess                                                        | Diagnosis            | ICD-9-CM         |
| 590.3       | Pyeloureteritis cystica                                                              | Diagnosis            | ICD-9-CM         |
| 590.8       | Other pyelonephritis or pyonephrosis, not specified as acute or chronic              | Diagnosis            | ICD-9-CM         |
| 590.80      | Unspecified pyelonephritis                                                           | Diagnosis            | ICD-9-CM         |
| 590.81      | Pyelitis or pyelonephritis in diseases classified elsewhere                          | Diagnosis            | ICD-9-CM         |
| 590.9       | Unspecified infection of kidney                                                      | Diagnosis            | ICD-9-CM         |
| 591         | Hydronephrosis                                                                       | Diagnosis            | ICD-9-CM         |
| 593         | Other disorders of kidney and ureter                                                 | Diagnosis            | ICD-9-CM         |
| 593.1       | Hypertrophy of kidney                                                                | Diagnosis            | ICD-9-CM         |
| 593.4       | Other ureteric obstruction                                                           | Diagnosis            | ICD-9-CM         |
| 593.5       | Hydroureter                                                                          | Diagnosis            | ICD-9-CM         |
| 593.7       | Vesicoureteral reflux                                                                | Diagnosis            | ICD-9-CM         |
| 593.70      | Vesicoureteral reflux, unspecified or without reflex nephropathy                     | Diagnosis            | ICD-9-CM         |
| 593.71      | Vesicoureteral reflux with reflux nephropathy, unilateral                            | Diagnosis            | ICD-9-CM         |
| 593.72      | Vesicoureteral reflux with reflux nephropathy, bilateral                             | Diagnosis            | ICD-9-CM         |
| 593.73      | Vesicoureteral reflux with reflux nephropathy, NOS                                   | Diagnosis            | ICD-9-CM         |
| 593.8       | Other specified disorders of kidney and ureter                                       | Diagnosis            | ICD-9-CM         |
| 593.81      | Vascular disorders of kidney                                                         | Diagnosis            | ICD-9-CM         |
| 593.89      | Other specified disorder of kidney and ureter                                        | Diagnosis            | ICD-9-CM         |
| 593.9       | Unspecified disorder of kidney and ureter                                            | Diagnosis            | ICD-9-CM         |
| 599.6       | Urinary obstruction                                                                  | Diagnosis            | ICD-9-CM         |
| 599.60      | Urinary obstruction, unspecified                                                     | Diagnosis            | ICD-9-CM         |
| 599.69      | Urinary obstruction, not elsewhere classified                                        | Diagnosis            | ICD-9-CM         |
| 599.7       | Hematuria                                                                            | Diagnosis            | ICD-9-CM         |
| 599.70      | Hematuria, unspecified                                                               | Diagnosis            | ICD-9-CM         |
| 599.71      | Gross hematuria                                                                      | Diagnosis            | ICD-9-CM         |
| 599.72      | Microscopic hematuria                                                                | Diagnosis            | ICD-9-CM         |
| E09.21      | Drug or chemical induced diabetes mellitus with diabetic nephropathy                 | Diagnosis            | ICD-10-CM        |
| E09.22      | Drug or chemical induced diabetes mellitus with diabetic chronic kidney disease      | Diagnosis            | ICD-10-CM        |
| E09.29      | Drug or chemical induced diabetes mellitus with other diabetic kidney complication   | Diagnosis            | ICD-10-CM        |
| M32.14      | Glomerular disease in systemic lupus erythematosus                                   | Diagnosis            | ICD-10-CM        |
| M32.15      | Tubulo-interstitial nephropathy in systemic lupus erythematosus                      | Diagnosis            | ICD-10-CM        |
| M35.04      | Sicca syndrome with tubulo-interstitial nephropathy                                  | Diagnosis            | ICD-10-CM        |
| N00.0       | Acute nephritic syndrome with minor glomerular abnormality                           | Diagnosis            | ICD-10-CM        |
| N00.1       | Acute nephritic syndrome with focal and segmental glomerular lesions                 | Diagnosis            | ICD-10-CM        |
| N00.2       | Acute nephritic syndrome with diffuse membranous glomerulonephritis                  | Diagnosis            | ICD-10-CM        |
| N00.3       | Acute nephritic syndrome with diffuse mesangial proliferative glomerulonephritis     | Diagnosis            | ICD-10-CM        |
| N00.4       | Acute nephritic syndrome with diffuse endocapillary proliferative glomerulonephritis | Diagnosis            | ICD-10-CM        |
| N00.5       | Acute nephritic syndrome with diffuse mesangiocapillary glomerulonephritis           | Diagnosis            | ICD-10-CM        |
| N00.6       | Acute nephritic syndrome with dense deposit disease                                  | Diagnosis            | ICD-10-CM        |

| Code  | Description                                                                                        | Code      |           |
|-------|----------------------------------------------------------------------------------------------------|-----------|-----------|
|       |                                                                                                    | Category  | Code Type |
| N00.7 | Acute nephritic syndrome with diffuse crescentic glomerulonephritis                                | Diagnosis | ICD-10-CM |
| N00.8 | Acute nephritic syndrome with other morphologic changes                                            | Diagnosis | ICD-10-CM |
| N00.9 | Acute nephritic syndrome with unspecified morphologic changes                                      | Diagnosis | ICD-10-CM |
| N01.0 | Rapidly progressive nephritic syndrome with minor glomerular abnormality                           | Diagnosis | ICD-10-CM |
| N01.1 | Rapidly progressive nephritic syndrome with focal and segmental glomerular lesions                 | Diagnosis | ICD-10-CM |
| N01.2 | Rapidly progressive nephritic syndrome with diffuse membranous glomerulonephritis                  | Diagnosis | ICD-10-CM |
| N01.3 | Rapidly progressive nephritic syndrome with diffuse mesangial proliferative glomerulonephritis     | Diagnosis | ICD-10-CM |
| N01.4 | Rapidly progressive nephritic syndrome with diffuse endocapillary proliferative glomerulonephritis | Diagnosis | ICD-10-CM |
| N01.5 | Rapidly progressive nephritic syndrome with diffuse mesangiocapillary glomerulonephritis           | Diagnosis | ICD-10-CM |
| N01.6 | Rapidly progressive nephritic syndrome with dense deposit disease                                  | Diagnosis | ICD-10-CM |
| N01.7 | Rapidly progressive nephritic syndrome with diffuse crescentic glomerulonephritis                  | Diagnosis | ICD-10-CM |
| N01.8 | Rapidly progressive nephritic syndrome with other morphologic changes                              | Diagnosis | ICD-10-CM |
| N01.9 | Rapidly progressive nephritic syndrome with unspecified morphologic changes                        | Diagnosis | ICD-10-CM |
| N02.0 | Recurrent and persistent hematuria with minor glomerular abnormality                               | Diagnosis | ICD-10-CM |
| N02.1 | Recurrent and persistent hematuria with focal and segmental glomerular lesions                     | Diagnosis | ICD-10-CM |
| N02.2 | Recurrent and persistent hematuria with diffuse membranous glomerulonephritis                      | Diagnosis | ICD-10-CM |
| N02.3 | Recurrent and persistent hematuria with diffuse mesangial proliferative glomerulonephritis         | Diagnosis | ICD-10-CM |
| N02.4 | Recurrent and persistent hematuria with diffuse endocapillary proliferative glomerulonephritis     | Diagnosis | ICD-10-CM |
| N02.5 | Recurrent and persistent hematuria with diffuse mesangiocapillary glomerulonephritis               | Diagnosis | ICD-10-CM |
| N02.6 | Recurrent and persistent hematuria with dense deposit disease                                      | Diagnosis | ICD-10-CM |
| N02.7 | Recurrent and persistent hematuria with diffuse crescentic glomerulonephritis                      | Diagnosis | ICD-10-CM |
| N02.8 | Recurrent and persistent hematuria with other morphologic changes                                  | Diagnosis | ICD-10-CM |
| N02.9 | Recurrent and persistent hematuria with unspecified morphologic changes                            | Diagnosis | ICD-10-CM |
| N03.0 | Chronic nephritic syndrome with minor glomerular abnormality                                       | Diagnosis | ICD-10-CM |
| N03.1 | Chronic nephritic syndrome with focal and segmental glomerular lesions                             | Diagnosis | ICD-10-CM |
| N03.2 | Chronic nephritic syndrome with diffuse membranous glomerulonephritis                              | Diagnosis | ICD-10-CM |
| N03.3 | Chronic nephritic syndrome with diffuse mesangial proliferative glomerulonephritis                 | Diagnosis | ICD-10-CM |
| N03.4 | Chronic nephritic syndrome with diffuse endocapillary proliferative glomerulonephritis             | Diagnosis | ICD-10-CM |
| N03.5 | Chronic nephritic syndrome with diffuse mesangiocapillary glomerulonephritis                       | Diagnosis | ICD-10-CM |
| N03.6 | Chronic nephritic syndrome with dense deposit disease                                              | Diagnosis | ICD-10-CM |
| N03.7 | Chronic nephritic syndrome with diffuse crescentic glomerulonephritis                              | Diagnosis | ICD-10-CM |
| N03.8 | Chronic nephritic syndrome with other morphologic changes                                          | Diagnosis | ICD-10-CM |
| N03.9 | Chronic nephritic syndrome with unspecified morphologic changes                                    | Diagnosis | ICD-10-CM |
| N04.0 | Nephrotic syndrome with minor glomerular abnormality                                               | Diagnosis | ICD-10-CM |
| N04.1 | Nephrotic syndrome with focal and segmental glomerular lesions                                     | Diagnosis | ICD-10-CM |
| N04.2 | Nephrotic syndrome with diffuse membranous glomerulonephritis                                      | Diagnosis | ICD-10-CM |

| Code  | Description                                                                                                  | Code      |           |
|-------|--------------------------------------------------------------------------------------------------------------|-----------|-----------|
|       |                                                                                                              | Category  | Code Type |
| N04.3 | Nephrotic syndrome with diffuse mesangial proliferative glomerulonephritis                                   | Diagnosis | ICD-10-CM |
| N04.4 | Nephrotic syndrome with diffuse endocapillary proliferative glomerulonephritis                               | Diagnosis | ICD-10-CM |
| N04.5 | Nephrotic syndrome with diffuse mesangiocapillary glomerulonephritis                                         | Diagnosis | ICD-10-CM |
| N04.6 | Nephrotic syndrome with dense deposit disease                                                                | Diagnosis | ICD-10-CM |
| N04.7 | Nephrotic syndrome with diffuse crescentic glomerulonephritis                                                | Diagnosis | ICD-10-CM |
| N04.8 | Nephrotic syndrome with other morphologic changes                                                            | Diagnosis | ICD-10-CM |
| N04.9 | Nephrotic syndrome with unspecified morphologic changes                                                      | Diagnosis | ICD-10-CM |
| N05.0 | Unspecified nephritic syndrome with minor glomerular abnormality                                             | Diagnosis | ICD-10-CM |
| N05.1 | Unspecified nephritic syndrome with focal and segmental glomerular lesions                                   | Diagnosis | ICD-10-CM |
| N05.2 | Unspecified nephritic syndrome with diffuse membranous glomerulonephritis                                    | Diagnosis | ICD-10-CM |
| N05.3 | Unspecified nephritic syndrome with diffuse mesangial proliferative glomerulonephritis                       | Diagnosis | ICD-10-CM |
| N05.4 | Unspecified nephritic syndrome with diffuse endocapillary proliferative glomerulonephritis                   | Diagnosis | ICD-10-CM |
| N05.5 | Unspecified nephritic syndrome with diffuse mesangiocapillary glomerulonephritis                             | Diagnosis | ICD-10-CM |
| N05.6 | Unspecified nephritic syndrome with dense deposit disease                                                    | Diagnosis | ICD-10-CM |
| N05.7 | Unspecified nephritic syndrome with diffuse crescentic glomerulonephritis                                    | Diagnosis | ICD-10-CM |
| N05.8 | Unspecified nephritic syndrome with other morphologic changes                                                | Diagnosis | ICD-10-CM |
| N05.9 | Unspecified nephritic syndrome with unspecified morphologic changes                                          | Diagnosis | ICD-10-CM |
| N07.0 | Hereditary nephropathy, not elsewhere classified with minor glomerular abnormality                           | Diagnosis | ICD-10-CM |
| N07.1 | Hereditary nephropathy, not elsewhere classified with focal and segmental glomerular lesions                 | Diagnosis | ICD-10-CM |
| N07.2 | Hereditary nephropathy, not elsewhere classified with diffuse membranous glomerulonephritis                  | Diagnosis | ICD-10-CM |
| N07.3 | Hereditary nephropathy, not elsewhere classified with diffuse mesangial proliferative glomerulonephritis     | Diagnosis | ICD-10-CM |
| N07.4 | Hereditary nephropathy, not elsewhere classified with diffuse endocapillary proliferative glomerulonephritis | Diagnosis | ICD-10-CM |
| N07.5 | Hereditary nephropathy, not elsewhere classified with diffuse mesangiocapillary glomerulonephritis           | Diagnosis | ICD-10-CM |
| N07.6 | Hereditary nephropathy, not elsewhere classified with dense deposit disease                                  | Diagnosis | ICD-10-CM |
| N07.7 | Hereditary nephropathy, not elsewhere classified with diffuse crescentic glomerulonephritis                  | Diagnosis | ICD-10-CM |
| N07.8 | Hereditary nephropathy, not elsewhere classified with other morphologic lesions                              | Diagnosis | ICD-10-CM |
| N07.9 | Hereditary nephropathy, not elsewhere classified with unspecified morphologic lesions                        | Diagnosis | ICD-10-CM |
| N08   | Glomerular disorders in diseases classified elsewhere                                                        | Diagnosis | ICD-10-CM |
| N10   | Acute pyelonephritis                                                                                         | Diagnosis | ICD-10-CM |
| N11.0 | Nonobstructive reflux-associated chronic pyelonephritis                                                      | Diagnosis | ICD-10-CM |
| N11.1 | Chronic obstructive pyelonephritis                                                                           | Diagnosis | ICD-10-CM |
| N11.8 | Other chronic tubulo-interstitial nephritis                                                                  | Diagnosis | ICD-10-CM |
| N11.9 | Chronic tubulo-interstitial nephritis, unspecified                                                           | Diagnosis | ICD-10-CM |
| N12   | Tubulo-interstitial nephritis, not specified as acute or chronic                                             | Diagnosis | ICD-10-CM |
| N13.0 | Hydronephrosis with ureteropelvic junction obstruction                                                       | Diagnosis | ICD-10-CM |

| <b>Code</b> | <b>Description</b>                                                             | <b>Code Category</b> | <b>Code Type</b> |
|-------------|--------------------------------------------------------------------------------|----------------------|------------------|
| N13.1       | Hydronephrosis with ureteral stricture, not elsewhere classified               | Diagnosis            | ICD-10-CM        |
| N13.2       | Hydronephrosis with renal and ureteral calculous obstruction                   | Diagnosis            | ICD-10-CM        |
| N13.30      | Unspecified hydronephrosis                                                     | Diagnosis            | ICD-10-CM        |
| N13.39      | Other hydronephrosis                                                           | Diagnosis            | ICD-10-CM        |
| N13.4       | Hydroureter                                                                    | Diagnosis            | ICD-10-CM        |
| N13.5       | Crossing vessel and stricture of ureter without hydronephrosis                 | Diagnosis            | ICD-10-CM        |
| N13.6       | Pyonephrosis                                                                   | Diagnosis            | ICD-10-CM        |
| N13.70      | Vesicoureteral-reflux, unspecified                                             | Diagnosis            | ICD-10-CM        |
| N13.71      | Vesicoureteral-reflux without reflux nephropathy                               | Diagnosis            | ICD-10-CM        |
| N13.721     | Vesicoureteral-reflux with reflux nephropathy without hydroureter, unilateral  | Diagnosis            | ICD-10-CM        |
| N13.722     | Vesicoureteral-reflux with reflux nephropathy without hydroureter, bilateral   | Diagnosis            | ICD-10-CM        |
| N13.729     | Vesicoureteral-reflux with reflux nephropathy without hydroureter, unspecified | Diagnosis            | ICD-10-CM        |
| N13.731     | Vesicoureteral-reflux with reflux nephropathy with hydroureter, unilateral     | Diagnosis            | ICD-10-CM        |
| N13.732     | Vesicoureteral-reflux with reflux nephropathy with hydroureter, bilateral      | Diagnosis            | ICD-10-CM        |
| N13.739     | Vesicoureteral-reflux with reflux nephropathy with hydroureter, unspecified    | Diagnosis            | ICD-10-CM        |
| N13.8       | Other obstructive and reflux uropathy                                          | Diagnosis            | ICD-10-CM        |
| N13.9       | Obstructive and reflux uropathy, unspecified                                   | Diagnosis            | ICD-10-CM        |
| N14.0       | Analgesic nephropathy                                                          | Diagnosis            | ICD-10-CM        |
| N14.1       | Nephropathy induced by other drugs, medicaments and biological substances      | Diagnosis            | ICD-10-CM        |
| N14.2       | Nephropathy induced by unspecified drug, medicament or biological substance    | Diagnosis            | ICD-10-CM        |
| N14.3       | Nephropathy induced by heavy metals                                            | Diagnosis            | ICD-10-CM        |
| N14.4       | Toxic nephropathy, not elsewhere classified                                    | Diagnosis            | ICD-10-CM        |
| N15.0       | Balkan nephropathy                                                             | Diagnosis            | ICD-10-CM        |
| N15.1       | Renal and perinephric abscess                                                  | Diagnosis            | ICD-10-CM        |
| N15.8       | Other specified renal tubulo-interstitial diseases                             | Diagnosis            | ICD-10-CM        |
| N15.9       | Renal tubulo-interstitial disease, unspecified                                 | Diagnosis            | ICD-10-CM        |
| N16         | Renal tubulo-interstitial disorders in diseases classified elsewhere           | Diagnosis            | ICD-10-CM        |
| N17.0       | Acute kidney failure with tubular necrosis                                     | Diagnosis            | ICD-10-CM        |
| N17.1       | Acute kidney failure with acute cortical necrosis                              | Diagnosis            | ICD-10-CM        |
| N17.2       | Acute kidney failure with medullary necrosis                                   | Diagnosis            | ICD-10-CM        |
| N17.8       | Other acute kidney failure                                                     | Diagnosis            | ICD-10-CM        |
| N17.9       | Acute kidney failure, unspecified                                              | Diagnosis            | ICD-10-CM        |
| N18.1       | Chronic kidney disease, stage 1                                                | Diagnosis            | ICD-10-CM        |
| N18.2       | Chronic kidney disease, stage 2 (mild)                                         | Diagnosis            | ICD-10-CM        |
| N18.3       | Chronic kidney disease, stage 3 (moderate)                                     | Diagnosis            | ICD-10-CM        |
| N18.4       | Chronic kidney disease, stage 4 (severe)                                       | Diagnosis            | ICD-10-CM        |
| N18.5       | Chronic kidney disease, stage 5                                                | Diagnosis            | ICD-10-CM        |
| N18.6       | End stage renal disease                                                        | Diagnosis            | ICD-10-CM        |
| N18.9       | Chronic kidney disease, unspecified                                            | Diagnosis            | ICD-10-CM        |
| N19         | Unspecified kidney failure                                                     | Diagnosis            | ICD-10-CM        |
| N25.89      | Other disorders resulting from impaired renal tubular function                 | Diagnosis            | ICD-10-CM        |
| N25.9       | Disorder resulting from impaired renal tubular function, unspecified           | Diagnosis            | ICD-10-CM        |
| N28.89      | Other specified disorders of kidney and ureter                                 | Diagnosis            | ICD-10-CM        |
| N28.9       | Disorder of kidney and ureter, unspecified                                     | Diagnosis            | ICD-10-CM        |
| N29         | Other disorders of kidney and ureter in diseases classified elsewhere          | Diagnosis            | ICD-10-CM        |

| Code           | Description                                                                                                                                | Code      |           |
|----------------|--------------------------------------------------------------------------------------------------------------------------------------------|-----------|-----------|
|                |                                                                                                                                            | Category  | Code Type |
| <b>Obesity</b> |                                                                                                                                            |           |           |
| 278.00         | Obesity, unspecified                                                                                                                       | Diagnosis | ICD-9-CM  |
| 278.01         | Morbid obesity                                                                                                                             | Diagnosis | ICD-9-CM  |
| 539.0          | Complications of gastric band procedure                                                                                                    | Diagnosis | ICD-9-CM  |
| 539.01         | Infection due to gastric band procedure                                                                                                    | Diagnosis | ICD-9-CM  |
| 539.09         | Other complications of gastric band procedure                                                                                              | Diagnosis | ICD-9-CM  |
| 539.8          | Complications of other bariatric procedure                                                                                                 | Diagnosis | ICD-9-CM  |
| 539.81         | Infection due to other bariatric procedure                                                                                                 | Diagnosis | ICD-9-CM  |
| 539.89         | Other complications of other bariatric procedure                                                                                           | Diagnosis | ICD-9-CM  |
| 649.1          | Obesity complicating pregnancy, childbirth, or the puerperium                                                                              | Diagnosis | ICD-9-CM  |
| 649.10         | Obesity complicating pregnancy, childbirth, or the puerperium, unspecified as to episode of care or not applicable                         | Diagnosis | ICD-9-CM  |
| 649.11         | Obesity complicating pregnancy, childbirth, or the puerperium, delivered, with or without mention of antepartum condition                  | Diagnosis | ICD-9-CM  |
| 649.12         | Obesity complicating pregnancy, childbirth, or the puerperium, delivered, with mention of postpartum complication                          | Diagnosis | ICD-9-CM  |
| 649.13         | Obesity complicating pregnancy, childbirth, or the puerperium, antepartum condition or complication                                        | Diagnosis | ICD-9-CM  |
| 649.14         | Obesity complicating pregnancy, childbirth, or the puerperium, postpartum condition or complication                                        | Diagnosis | ICD-9-CM  |
| 649.2          | Bariatric surgery status complicating pregnancy, childbirth, or the puerperium                                                             | Diagnosis | ICD-9-CM  |
| 649.20         | Bariatric surgery status complicating pregnancy, childbirth, or the puerperium, unspecified as to episode of care or not applicable        | Diagnosis | ICD-9-CM  |
| 649.21         | Bariatric surgery status complicating pregnancy, childbirth, or the puerperium, delivered, with or without mention of antepartum condition | Diagnosis | ICD-9-CM  |
| 649.22         | Bariatric surgery status complicating pregnancy, childbirth, or the puerperium, delivered, with mention of postpartum complication         | Diagnosis | ICD-9-CM  |
| 649.23         | Bariatric surgery status complicating pregnancy, childbirth, or the puerperium, antepartum condition or complication                       | Diagnosis | ICD-9-CM  |
| 649.24         | Bariatric surgery status complicating pregnancy, childbirth, or the puerperium, postpartum condition or complication                       | Diagnosis | ICD-9-CM  |
| V85.3          | Body Mass Index between 30-39, adult                                                                                                       | Diagnosis | ICD-9-CM  |
| V85.30         | Body Mass Index 30.0-30.9, adult                                                                                                           | Diagnosis | ICD-9-CM  |
| V85.31         | Body Mass Index 31.0-31.9, adult                                                                                                           | Diagnosis | ICD-9-CM  |
| V85.32         | Body Mass Index 32.0-32.9, adult                                                                                                           | Diagnosis | ICD-9-CM  |
| V85.33         | Body Mass Index 33.0-33.9, adult                                                                                                           | Diagnosis | ICD-9-CM  |
| V85.34         | Body Mass Index 34.0-34.9, adult                                                                                                           | Diagnosis | ICD-9-CM  |
| V85.35         | Body Mass Index 35.0-35.9, adult                                                                                                           | Diagnosis | ICD-9-CM  |
| V85.36         | Body Mass Index 36.0-36.9, adult                                                                                                           | Diagnosis | ICD-9-CM  |
| V85.37         | Body Mass Index 37.0-37.9, adult                                                                                                           | Diagnosis | ICD-9-CM  |
| V85.38         | Body Mass Index 38.0-38.9, adult                                                                                                           | Diagnosis | ICD-9-CM  |
| V85.39         | Body Mass Index 39.0-39.9, adult                                                                                                           | Diagnosis | ICD-9-CM  |
| V85.4          | Body Mass Index 40 and over, adult                                                                                                         | Diagnosis | ICD-9-CM  |
| V85.41         | Body Mass Index 40.0-44.9, adult                                                                                                           | Diagnosis | ICD-9-CM  |
| V85.42         | Body Mass Index 45.0-49.9, adult                                                                                                           | Diagnosis | ICD-9-CM  |



| <b>Code</b> | <b>Description</b>                                                     | <b>Code</b>     | <b>Code Type</b> |
|-------------|------------------------------------------------------------------------|-----------------|------------------|
|             |                                                                        | <b>Category</b> |                  |
| V85.43      | Body Mass Index 50.0-59.9, adult                                       | Diagnosis       | ICD-9-CM         |
| V85.44      | Body Mass Index 60.0-69.9, adult                                       | Diagnosis       | ICD-9-CM         |
| V85.45      | Body Mass Index 70 and over, adult                                     | Diagnosis       | ICD-9-CM         |
| E66.01      | Morbid (severe) obesity due to excess calories                         | Diagnosis       | ICD-10-CM        |
| E66.09      | Other obesity due to excess calories                                   | Diagnosis       | ICD-10-CM        |
| E66.1       | Drug-induced obesity                                                   | Diagnosis       | ICD-10-CM        |
| E66.8       | Other obesity                                                          | Diagnosis       | ICD-10-CM        |
| E66.9       | Obesity, unspecified                                                   | Diagnosis       | ICD-10-CM        |
| K95.01      | Infection due to gastric band procedure                                | Diagnosis       | ICD-10-CM        |
| K95.09      | Other complications of gastric band procedure                          | Diagnosis       | ICD-10-CM        |
| K95.81      | Infection due to other bariatric procedure                             | Diagnosis       | ICD-10-CM        |
| K95.89      | Other complications of other bariatric procedure                       | Diagnosis       | ICD-10-CM        |
| O99.210     | Obesity complicating pregnancy, unspecified trimester                  | Diagnosis       | ICD-10-CM        |
| O99.211     | Obesity complicating pregnancy, first trimester                        | Diagnosis       | ICD-10-CM        |
| O99.212     | Obesity complicating pregnancy, second trimester                       | Diagnosis       | ICD-10-CM        |
| O99.213     | Obesity complicating pregnancy, third trimester                        | Diagnosis       | ICD-10-CM        |
| O99.214     | Obesity complicating childbirth                                        | Diagnosis       | ICD-10-CM        |
| O99.215     | Obesity complicating the puerperium                                    | Diagnosis       | ICD-10-CM        |
| O99.840     | Bariatric surgery status complicating pregnancy, unspecified trimester | Diagnosis       | ICD-10-CM        |
| O99.841     | Bariatric surgery status complicating pregnancy, first trimester       | Diagnosis       | ICD-10-CM        |
| O99.842     | Bariatric surgery status complicating pregnancy, second trimester      | Diagnosis       | ICD-10-CM        |
| O99.843     | Bariatric surgery status complicating pregnancy, third trimester       | Diagnosis       | ICD-10-CM        |
| O99.844     | Bariatric surgery status complicating childbirth                       | Diagnosis       | ICD-10-CM        |
| O99.845     | Bariatric surgery status complicating the puerperium                   | Diagnosis       | ICD-10-CM        |
| Z68.30      | Body mass index (BMI) 30.0-30.9, adult                                 | Diagnosis       | ICD-10-CM        |
| Z68.31      | Body mass index (BMI) 31.0-31.9, adult                                 | Diagnosis       | ICD-10-CM        |
| Z68.32      | Body mass index (BMI) 32.0-32.9, adult                                 | Diagnosis       | ICD-10-CM        |
| Z68.33      | Body mass index (BMI) 33.0-33.9, adult                                 | Diagnosis       | ICD-10-CM        |
| Z68.34      | Body mass index (BMI) 34.0-34.9, adult                                 | Diagnosis       | ICD-10-CM        |
| Z68.35      | Body mass index (BMI) 35.0-35.9, adult                                 | Diagnosis       | ICD-10-CM        |
| Z68.36      | Body mass index (BMI) 36.0-36.9, adult                                 | Diagnosis       | ICD-10-CM        |
| Z68.37      | Body mass index (BMI) 37.0-37.9, adult                                 | Diagnosis       | ICD-10-CM        |
| Z68.38      | Body mass index (BMI) 38.0-38.9, adult                                 | Diagnosis       | ICD-10-CM        |
| Z68.39      | Body mass index (BMI) 39.0-39.9, adult                                 | Diagnosis       | ICD-10-CM        |
| Z68.41      | Body mass index (BMI) 40.0-44.9, adult                                 | Diagnosis       | ICD-10-CM        |
| Z68.42      | Body mass index (BMI) 45.0-49.9, adult                                 | Diagnosis       | ICD-10-CM        |
| Z68.43      | Body mass index (BMI) 50-59.9, adult                                   | Diagnosis       | ICD-10-CM        |
| Z68.44      | Body mass index (BMI) 60.0-69.9, adult                                 | Diagnosis       | ICD-10-CM        |
| Z68.45      | Body mass index (BMI) 70 or greater, adult                             | Diagnosis       | ICD-10-CM        |
| 278.03      | Obesity hypoventilation syndrome                                       | Diagnosis       | ICD-10-CM        |
| E66.2       | Morbid (severe) obesity with alveolar hypoventilation                  | Diagnosis       | ICD-10-CM        |
| 43.89       | Open and other partial gastrectomy                                     | Procedure       | ICD-9-PCS        |
| 44.38       | Laparoscopic gastroenterostomy                                         | Procedure       | ICD-9-PCS        |
| 44.39       | Other gastroenterostomy without gastrectomy                            | Procedure       | ICD-9-PCS        |
| 44.68       | Laparoscopic gastroplasty                                              | Procedure       | ICD-9-PCS        |

| Code    | Description                                                                                               | Code      |            |
|---------|-----------------------------------------------------------------------------------------------------------|-----------|------------|
|         |                                                                                                           | Category  | Code Type  |
| 44.95   | Laparoscopic gastric restrictive procedure                                                                | Procedure | ICD-9-PCS  |
| OD16079 | Bypass Stomach to Duodenum with Autologous Tissue Substitute, Open Approach                               | Procedure | ICD-10-PCS |
| OD1607A | Bypass Stomach to Jejunum with Autologous Tissue Substitute, Open Approach                                | Procedure | ICD-10-PCS |
| OD1607B | Bypass Stomach to Ileum with Autologous Tissue Substitute, Open Approach                                  | Procedure | ICD-10-PCS |
| OD1607L | Bypass Stomach to Transverse Colon with Autologous Tissue Substitute, Open Approach                       | Procedure | ICD-10-PCS |
| OD160J9 | Bypass Stomach to Duodenum with Synthetic Substitute, Open Approach                                       | Procedure | ICD-10-PCS |
| OD160JA | Bypass Stomach to Jejunum with Synthetic Substitute, Open Approach                                        | Procedure | ICD-10-PCS |
| OD160JB | Bypass Stomach to Ileum with Synthetic Substitute, Open Approach                                          | Procedure | ICD-10-PCS |
| OD160JL | Bypass Stomach to Transverse Colon with Synthetic Substitute, Open Approach                               | Procedure | ICD-10-PCS |
| OD160K9 | Bypass Stomach to Duodenum with Nonautologous Tissue Substitute, Open Approach                            | Procedure | ICD-10-PCS |
| OD160KA | Bypass Stomach to Jejunum with Nonautologous Tissue Substitute, Open Approach                             | Procedure | ICD-10-PCS |
| OD160KB | Bypass Stomach to Ileum with Nonautologous Tissue Substitute, Open Approach                               | Procedure | ICD-10-PCS |
| OD160KL | Bypass Stomach to Transverse Colon with Nonautologous Tissue Substitute, Open Approach                    | Procedure | ICD-10-PCS |
| OD160Z9 | Bypass Stomach to Duodenum, Open Approach                                                                 | Procedure | ICD-10-PCS |
| OD160ZA | Bypass Stomach to Jejunum, Open Approach                                                                  | Procedure | ICD-10-PCS |
| OD160ZB | Bypass Stomach to Ileum, Open Approach                                                                    | Procedure | ICD-10-PCS |
| OD160ZL | Bypass Stomach to Transverse Colon, Open Approach                                                         | Procedure | ICD-10-PCS |
| OD16479 | Bypass Stomach to Duodenum with Autologous Tissue Substitute, Percutaneous Endoscopic Approach            | Procedure | ICD-10-PCS |
| OD1647A | Bypass Stomach to Jejunum with Autologous Tissue Substitute, Percutaneous Endoscopic Approach             | Procedure | ICD-10-PCS |
| OD1647B | Bypass Stomach to Ileum with Autologous Tissue Substitute, Percutaneous Endoscopic Approach               | Procedure | ICD-10-PCS |
| OD1647L | Bypass Stomach to Transverse Colon with Autologous Tissue Substitute, Percutaneous Endoscopic Approach    | Procedure | ICD-10-PCS |
| OD164J9 | Bypass Stomach to Duodenum with Synthetic Substitute, Percutaneous Endoscopic Approach                    | Procedure | ICD-10-PCS |
| OD164JA | Bypass Stomach to Jejunum with Synthetic Substitute, Percutaneous Endoscopic Approach                     | Procedure | ICD-10-PCS |
| OD164JB | Bypass Stomach to Ileum with Synthetic Substitute, Percutaneous Endoscopic Approach                       | Procedure | ICD-10-PCS |
| OD164JL | Bypass Stomach to Transverse Colon with Synthetic Substitute, Percutaneous Endoscopic Approach            | Procedure | ICD-10-PCS |
| OD164K9 | Bypass Stomach to Duodenum with Nonautologous Tissue Substitute, Percutaneous Endoscopic Approach         | Procedure | ICD-10-PCS |
| OD164KA | Bypass Stomach to Jejunum with Nonautologous Tissue Substitute, Percutaneous Endoscopic Approach          | Procedure | ICD-10-PCS |
| OD164KB | Bypass Stomach to Ileum with Nonautologous Tissue Substitute, Percutaneous Endoscopic Approach            | Procedure | ICD-10-PCS |
| OD164KL | Bypass Stomach to Transverse Colon with Nonautologous Tissue Substitute, Percutaneous Endoscopic Approach | Procedure | ICD-10-PCS |

| Code    | Description                                                                                                           | Code      |            |
|---------|-----------------------------------------------------------------------------------------------------------------------|-----------|------------|
|         |                                                                                                                       | Category  | Code Type  |
| 0D164Z9 | Bypass Stomach to Duodenum, Percutaneous Endoscopic Approach                                                          | Procedure | ICD-10-PCS |
| 0D164ZA | Bypass Stomach to Jejunum, Percutaneous Endoscopic Approach                                                           | Procedure | ICD-10-PCS |
| 0D164ZB | Bypass Stomach to Ileum, Percutaneous Endoscopic Approach                                                             | Procedure | ICD-10-PCS |
| 0D164ZL | Bypass Stomach to Transverse Colon, Percutaneous Endoscopic Approach                                                  | Procedure | ICD-10-PCS |
| 0D16879 | Bypass Stomach to Duodenum with Autologous Tissue Substitute, Via Natural or Artificial Opening Endoscopic            | Procedure | ICD-10-PCS |
| 0D1687A | Bypass Stomach to Jejunum with Autologous Tissue Substitute, Via Natural or Artificial Opening Endoscopic             | Procedure | ICD-10-PCS |
| 0D1687B | Bypass Stomach to Ileum with Autologous Tissue Substitute, Via Natural or Artificial Opening Endoscopic               | Procedure | ICD-10-PCS |
| 0D1687L | Bypass Stomach to Transverse Colon with Autologous Tissue Substitute, Via Natural or Artificial Opening Endoscopic    | Procedure | ICD-10-PCS |
| 0D168J9 | Bypass Stomach to Duodenum with Synthetic Substitute, Via Natural or Artificial Opening Endoscopic                    | Procedure | ICD-10-PCS |
| 0D168JA | Bypass Stomach to Jejunum with Synthetic Substitute, Via Natural or Artificial Opening Endoscopic                     | Procedure | ICD-10-PCS |
| 0D168JB | Bypass Stomach to Ileum with Synthetic Substitute, Via Natural or Artificial Opening Endoscopic                       | Procedure | ICD-10-PCS |
| 0D168JL | Bypass Stomach to Transverse Colon with Synthetic Substitute, Via Natural or Artificial Opening Endoscopic            | Procedure | ICD-10-PCS |
| 0D168K9 | Bypass Stomach to Duodenum with Nonautologous Tissue Substitute, Via Natural or Artificial Opening Endoscopic         | Procedure | ICD-10-PCS |
| 0D168KA | Bypass Stomach to Jejunum with Nonautologous Tissue Substitute, Via Natural or Artificial Opening Endoscopic          | Procedure | ICD-10-PCS |
| 0D168KB | Bypass Stomach to Ileum with Nonautologous Tissue Substitute, Via Natural or Artificial Opening Endoscopic            | Procedure | ICD-10-PCS |
| 0D168KL | Bypass Stomach to Transverse Colon with Nonautologous Tissue Substitute, Via Natural or Artificial Opening Endoscopic | Procedure | ICD-10-PCS |
| 0D168Z9 | Bypass Stomach to Duodenum, Via Natural or Artificial Opening Endoscopic                                              | Procedure | ICD-10-PCS |
| 0D168ZA | Bypass Stomach to Jejunum, Via Natural or Artificial Opening Endoscopic                                               | Procedure | ICD-10-PCS |
| 0D168ZB | Bypass Stomach to Ileum, Via Natural or Artificial Opening Endoscopic                                                 | Procedure | ICD-10-PCS |
| 0D168ZL | Bypass Stomach to Transverse Colon, Via Natural or Artificial Opening Endoscopic                                      | Procedure | ICD-10-PCS |
| 0D19079 | Bypass Duodenum to Duodenum with Autologous Tissue Substitute, Open Approach                                          | Procedure | ICD-10-PCS |
| 0D1907A | Bypass Duodenum to Jejunum with Autologous Tissue Substitute, Open Approach                                           | Procedure | ICD-10-PCS |
| 0D1907B | Bypass Duodenum to Ileum with Autologous Tissue Substitute, Open Approach                                             | Procedure | ICD-10-PCS |
| 0D190J9 | Bypass Duodenum to Duodenum with Synthetic Substitute, Open Approach                                                  | Procedure | ICD-10-PCS |
| 0D190JA | Bypass Duodenum to Jejunum with Synthetic Substitute, Open Approach                                                   | Procedure | ICD-10-PCS |
| 0D190JB | Bypass Duodenum to Ileum with Synthetic Substitute, Open Approach                                                     | Procedure | ICD-10-PCS |
| 0D190K9 | Bypass Duodenum to Duodenum with Nonautologous Tissue Substitute, Open Approach                                       | Procedure | ICD-10-PCS |
| 0D190KA | Bypass Duodenum to Jejunum with Nonautologous Tissue Substitute, Open Approach                                        | Procedure | ICD-10-PCS |

| Code    | Description                                                                                                    | Code      |            |
|---------|----------------------------------------------------------------------------------------------------------------|-----------|------------|
|         |                                                                                                                | Category  | Code Type  |
| 0D190KB | Bypass Duodenum to Ileum with Nonautologous Tissue Substitute, Open Approach                                   | Procedure | ICD-10-PCS |
| 0D190Z9 | Bypass Duodenum to Duodenum, Open Approach                                                                     | Procedure | ICD-10-PCS |
| 0D190ZA | Bypass Duodenum to Jejunum, Open Approach                                                                      | Procedure | ICD-10-PCS |
| 0D190ZB | Bypass Duodenum to Ileum, Open Approach                                                                        | Procedure | ICD-10-PCS |
| 0D19479 | Bypass Duodenum to Duodenum with Autologous Tissue Substitute, Percutaneous Endoscopic Approach                | Procedure | ICD-10-PCS |
| 0D1947A | Bypass Duodenum to Jejunum with Autologous Tissue Substitute, Percutaneous Endoscopic Approach                 | Procedure | ICD-10-PCS |
| 0D1947B | Bypass Duodenum to Ileum with Autologous Tissue Substitute, Percutaneous Endoscopic Approach                   | Procedure | ICD-10-PCS |
| 0D194J9 | Bypass Duodenum to Duodenum with Synthetic Substitute, Percutaneous Endoscopic Approach                        | Procedure | ICD-10-PCS |
| 0D194JA | Bypass Duodenum to Jejunum with Synthetic Substitute, Percutaneous Endoscopic Approach                         | Procedure | ICD-10-PCS |
| 0D194JB | Bypass Duodenum to Ileum with Synthetic Substitute, Percutaneous Endoscopic Approach                           | Procedure | ICD-10-PCS |
| 0D194K9 | Bypass Duodenum to Duodenum with Nonautologous Tissue Substitute, Percutaneous Endoscopic Approach             | Procedure | ICD-10-PCS |
| 0D194KA | Bypass Duodenum to Jejunum with Nonautologous Tissue Substitute, Percutaneous Endoscopic Approach              | Procedure | ICD-10-PCS |
| 0D194KB | Bypass Duodenum to Ileum with Nonautologous Tissue Substitute, Percutaneous Endoscopic Approach                | Procedure | ICD-10-PCS |
| 0D194Z9 | Bypass Duodenum to Duodenum, Percutaneous Endoscopic Approach                                                  | Procedure | ICD-10-PCS |
| 0D194ZA | Bypass Duodenum to Jejunum, Percutaneous Endoscopic Approach                                                   | Procedure | ICD-10-PCS |
| 0D194ZB | Bypass Duodenum to Ileum, Percutaneous Endoscopic Approach                                                     | Procedure | ICD-10-PCS |
| 0D19879 | Bypass Duodenum to Duodenum with Autologous Tissue Substitute, Via Natural or Artificial Opening Endoscopic    | Procedure | ICD-10-PCS |
| 0D1987A | Bypass Duodenum to Jejunum with Autologous Tissue Substitute, Via Natural or Artificial Opening Endoscopic     | Procedure | ICD-10-PCS |
| 0D1987B | Bypass Duodenum to Ileum with Autologous Tissue Substitute, Via Natural or Artificial Opening Endoscopic       | Procedure | ICD-10-PCS |
| 0D198J9 | Bypass Duodenum to Duodenum with Synthetic Substitute, Via Natural or Artificial Opening Endoscopic            | Procedure | ICD-10-PCS |
| 0D198JA | Bypass Duodenum to Jejunum with Synthetic Substitute, Via Natural or Artificial Opening Endoscopic             | Procedure | ICD-10-PCS |
| 0D198JB | Bypass Duodenum to Ileum with Synthetic Substitute, Via Natural or Artificial Opening Endoscopic               | Procedure | ICD-10-PCS |
| 0D198K9 | Bypass Duodenum to Duodenum with Nonautologous Tissue Substitute, Via Natural or Artificial Opening Endoscopic | Procedure | ICD-10-PCS |
| 0D198KA | Bypass Duodenum to Jejunum with Nonautologous Tissue Substitute, Via Natural or Artificial Opening Endoscopic  | Procedure | ICD-10-PCS |
| 0D198KB | Bypass Duodenum to Ileum with Nonautologous Tissue Substitute, Via Natural or Artificial Opening Endoscopic    | Procedure | ICD-10-PCS |
| 0D198Z9 | Bypass Duodenum to Duodenum, Via Natural or Artificial Opening Endoscopic                                      | Procedure | ICD-10-PCS |

| Code    | Description                                                                                                  | Code      |            |
|---------|--------------------------------------------------------------------------------------------------------------|-----------|------------|
|         |                                                                                                              | Category  | Code Type  |
| 0D198ZA | Bypass Duodenum to Jejunum, Via Natural or Artificial Opening Endoscopic                                     | Procedure | ICD-10-PCS |
| 0D198ZB | Bypass Duodenum to Ileum, Via Natural or Artificial Opening Endoscopic                                       | Procedure | ICD-10-PCS |
| 0D1A07A | Bypass Jejunum to Jejunum with Autologous Tissue Substitute, Open Approach                                   | Procedure | ICD-10-PCS |
| 0D1A07B | Bypass Jejunum to Ileum with Autologous Tissue Substitute, Open Approach                                     | Procedure | ICD-10-PCS |
| 0D1A0JA | Bypass Jejunum to Jejunum with Synthetic Substitute, Open Approach                                           | Procedure | ICD-10-PCS |
| 0D1A0JB | Bypass Jejunum to Ileum with Synthetic Substitute, Open Approach                                             | Procedure | ICD-10-PCS |
| 0D1A0KA | Bypass Jejunum to Jejunum with Nonautologous Tissue Substitute, Open Approach                                | Procedure | ICD-10-PCS |
| 0D1A0KB | Bypass Jejunum to Ileum with Nonautologous Tissue Substitute, Open Approach                                  | Procedure | ICD-10-PCS |
| 0D1A0ZA | Bypass Jejunum to Jejunum, Open Approach                                                                     | Procedure | ICD-10-PCS |
| 0D1A0ZB | Bypass Jejunum to Ileum, Open Approach                                                                       | Procedure | ICD-10-PCS |
| 0D1A47A | Bypass Jejunum to Jejunum with Autologous Tissue Substitute, Percutaneous Endoscopic Approach                | Procedure | ICD-10-PCS |
| 0D1A47B | Bypass Jejunum to Ileum with Autologous Tissue Substitute, Percutaneous Endoscopic Approach                  | Procedure | ICD-10-PCS |
| 0D1A4JA | Bypass Jejunum to Jejunum with Synthetic Substitute, Percutaneous Endoscopic Approach                        | Procedure | ICD-10-PCS |
| 0D1A4JB | Bypass Jejunum to Ileum with Synthetic Substitute, Percutaneous Endoscopic Approach                          | Procedure | ICD-10-PCS |
| 0D1A4KA | Bypass Jejunum to Jejunum with Nonautologous Tissue Substitute, Percutaneous Endoscopic Approach             | Procedure | ICD-10-PCS |
| 0D1A4KB | Bypass Jejunum to Ileum with Nonautologous Tissue Substitute, Percutaneous Endoscopic Approach               | Procedure | ICD-10-PCS |
| 0D1A4ZA | Bypass Jejunum to Jejunum, Percutaneous Endoscopic Approach                                                  | Procedure | ICD-10-PCS |
| 0D1A4ZB | Bypass Jejunum to Ileum, Percutaneous Endoscopic Approach                                                    | Procedure | ICD-10-PCS |
| 0D1A87A | Bypass Jejunum to Jejunum with Autologous Tissue Substitute, Via Natural or Artificial Opening Endoscopic    | Procedure | ICD-10-PCS |
| 0D1A87B | Bypass Jejunum to Ileum with Autologous Tissue Substitute, Via Natural or Artificial Opening Endoscopic      | Procedure | ICD-10-PCS |
| 0D1A8JA | Bypass Jejunum to Jejunum with Synthetic Substitute, Via Natural or Artificial Opening Endoscopic            | Procedure | ICD-10-PCS |
| 0D1A8JB | Bypass Jejunum to Ileum with Synthetic Substitute, Via Natural or Artificial Opening Endoscopic              | Procedure | ICD-10-PCS |
| 0D1A8KA | Bypass Jejunum to Jejunum with Nonautologous Tissue Substitute, Via Natural or Artificial Opening Endoscopic | Procedure | ICD-10-PCS |
| 0D1A8KB | Bypass Jejunum to Ileum with Nonautologous Tissue Substitute, Via Natural or Artificial Opening Endoscopic   | Procedure | ICD-10-PCS |
| 0D1A8ZA | Bypass Jejunum to Jejunum, Via Natural or Artificial Opening Endoscopic                                      | Procedure | ICD-10-PCS |
| 0D1A8ZB | Bypass Jejunum to Ileum, Via Natural or Artificial Opening Endoscopic                                        | Procedure | ICD-10-PCS |
| 0D1A8ZH | Bypass Jejunum to Cecum, Via Natural or Artificial Opening Endoscopic                                        | Procedure | ICD-10-PCS |
| 0D1B07B | Bypass Ileum to Ileum with Autologous Tissue Substitute, Open Approach                                       | Procedure | ICD-10-PCS |
| 0D1B0JB | Bypass Ileum to Ileum with Synthetic Substitute, Open Approach                                               | Procedure | ICD-10-PCS |
| 0D1B0KB | Bypass Ileum to Ileum with Nonautologous Tissue Substitute, Open Approach                                    | Procedure | ICD-10-PCS |
| 0D1B0ZB | Bypass Ileum to Ileum, Open Approach                                                                         | Procedure | ICD-10-PCS |
| 0D1B47B | Bypass Ileum to Ileum with Autologous Tissue Substitute, Percutaneous Endoscopic Approach                    | Procedure | ICD-10-PCS |

| Code    | Description                                                                                                                                                                                                      | Code      |            |
|---------|------------------------------------------------------------------------------------------------------------------------------------------------------------------------------------------------------------------|-----------|------------|
|         |                                                                                                                                                                                                                  | Category  | Code Type  |
| 0D1B4JB | Bypass Ileum to Ileum with Synthetic Substitute, Percutaneous Endoscopic Approach                                                                                                                                | Procedure | ICD-10-PCS |
| 0D1B4KB | Bypass Ileum to Ileum with Nonautologous Tissue Substitute, Percutaneous Endoscopic Approach                                                                                                                     | Procedure | ICD-10-PCS |
| 0D1B4ZB | Bypass Ileum to Ileum, Percutaneous Endoscopic Approach                                                                                                                                                          | Procedure | ICD-10-PCS |
| 0D1B87B | Bypass Ileum to Ileum with Autologous Tissue Substitute, Via Natural or Artificial Opening Endoscopic                                                                                                            | Procedure | ICD-10-PCS |
| 0D1B8JB | Bypass Ileum to Ileum with Synthetic Substitute, Via Natural or Artificial Opening Endoscopic                                                                                                                    | Procedure | ICD-10-PCS |
| 0D1B8KB | Bypass Ileum to Ileum with Nonautologous Tissue Substitute, Via Natural or Artificial Opening Endoscopic                                                                                                         | Procedure | ICD-10-PCS |
| 0D1B8ZB | Bypass Ileum to Ileum, Via Natural or Artificial Opening Endoscopic                                                                                                                                              | Procedure | ICD-10-PCS |
| 0D1B8ZH | Bypass Ileum to Cecum, Via Natural or Artificial Opening Endoscopic                                                                                                                                              | Procedure | ICD-10-PCS |
| 0DB60Z3 | Excision of Stomach, Open Approach, Vertical                                                                                                                                                                     | Procedure | ICD-10-PCS |
| 0DB60ZZ | Excision of Stomach, Open Approach                                                                                                                                                                               | Procedure | ICD-10-PCS |
| 0DB63Z3 | Excision of Stomach, Percutaneous Approach, Vertical                                                                                                                                                             | Procedure | ICD-10-PCS |
| 0DB63ZZ | Excision of Stomach, Percutaneous Approach                                                                                                                                                                       | Procedure | ICD-10-PCS |
| 0DB67Z3 | Excision of Stomach, Via Natural or Artificial Opening, Vertical                                                                                                                                                 | Procedure | ICD-10-PCS |
| 0DB67ZZ | Excision of Stomach, Via Natural or Artificial Opening                                                                                                                                                           | Procedure | ICD-10-PCS |
| 0DB68Z3 | Excision of Stomach, Via Natural or Artificial Opening Endoscopic, Vertical                                                                                                                                      | Procedure | ICD-10-PCS |
| 0DB80ZZ | Excision of Small Intestine, Open Approach                                                                                                                                                                       | Procedure | ICD-10-PCS |
| 0DB90ZZ | Excision of Duodenum, Open Approach                                                                                                                                                                              | Procedure | ICD-10-PCS |
| 0DBB0ZZ | Excision of Ileum, Open Approach                                                                                                                                                                                 | Procedure | ICD-10-PCS |
| 0DQ64ZZ | Repair Stomach, Percutaneous Endoscopic Approach                                                                                                                                                                 | Procedure | ICD-10-PCS |
| 0DV64CZ | Restriction of Stomach with Extraluminal Device, Percutaneous Endoscopic Approach                                                                                                                                | Procedure | ICD-10-PCS |
| 0F190Z3 | Bypass Common Bile Duct to Duodenum, Open Approach                                                                                                                                                               | Procedure | ICD-10-PCS |
| 43644   | Laparoscopy, surgical, gastric restrictive procedure; with gastric bypass and Roux-en-Y gastroenterostomy (roux limb 150 cm or less)                                                                             | Procedure | CPT-4      |
| 43645   | Laparoscopy, surgical, gastric restrictive procedure; with gastric bypass and small intestine reconstruction to limit absorption                                                                                 | Procedure | CPT-4      |
| 43659   | Unlisted laparoscopy procedure, stomach                                                                                                                                                                          | Procedure | CPT-4      |
| 43770   | Laparoscopy, surgical, gastric restrictive procedure; placement of adjustable gastric restrictive device (eg, gastric band and subcutaneous port components)                                                     | Procedure | CPT-4      |
| 43842   | Gastric restrictive procedure, without gastric bypass, for morbid obesity; vertical-banded gastroplasty                                                                                                          | Procedure | CPT-4      |
| 43843   | Gastric restrictive procedure, without gastric bypass, for morbid obesity; other than vertical-banded gastroplasty                                                                                               | Procedure | CPT-4      |
| 43844   | GASTRIC BYPASS NOT ROUX-EN-Y GASTROENTEROSTOMY                                                                                                                                                                   | Procedure | CPT-4      |
| 43845   | Gastric restrictive procedure with partial gastrectomy, pylorus-preserving duodenoileostomy and ileoileostomy (50 to 100 cm common channel) to limit absorption (biliopancreatic diversion with duodenal switch) | Procedure | CPT-4      |
| 43846   | Gastric restrictive procedure, with gastric bypass for morbid obesity; with short limb (150 cm or less) Roux-en-Y gastroenterostomy                                                                              | Procedure | CPT-4      |

| <b>Code</b>                    | <b>Description</b>                                                                                                                                 | <b>Code Category</b> | <b>Code Type</b> |
|--------------------------------|----------------------------------------------------------------------------------------------------------------------------------------------------|----------------------|------------------|
| 43847                          | Gastric restrictive procedure, with gastric bypass for morbid obesity; with small intestine reconstruction to limit absorption                     | Procedure            | CPT-4            |
| S2082                          | Laparoscopy, surgical; gastric restrictive procedure, adjustable gastric band includes placement of subcutaneous port                              | Procedure            | HCPCS            |
| S2085                          | Laparoscopy, gastric restrictive procedure, with gastric bypass for morbid obesity, with short limb (less than 100 cm) roux-en-y gastroenterostomy | Procedure            | HCPCS            |
| <b>Immunocompromised State</b> |                                                                                                                                                    |                      |                  |
| C88.0                          | Waldenstrom macroglobulinemia                                                                                                                      | Diagnosis            | ICD-10-CM        |
| C96.5                          | Multifocal and unisystemic Langerhans-cell histiocytosis                                                                                           | Diagnosis            | ICD-10-CM        |
| C96.6                          | Unifocal Langerhans-cell histiocytosis                                                                                                             | Diagnosis            | ICD-10-CM        |
| D47.2                          | Monoclonal gammopathy                                                                                                                              | Diagnosis            | ICD-10-CM        |
| D80.0                          | Hereditary hypogammaglobulinemia                                                                                                                   | Diagnosis            | ICD-10-CM        |
| D80.1                          | Nonfamilial hypogammaglobulinemia                                                                                                                  | Diagnosis            | ICD-10-CM        |
| D80.2                          | Selective deficiency of immunoglobulin A [IgA]                                                                                                     | Diagnosis            | ICD-10-CM        |
| D80.3                          | Selective deficiency of immunoglobulin G [IgG] subclasses                                                                                          | Diagnosis            | ICD-10-CM        |
| D80.4                          | Selective deficiency of immunoglobulin M [IgM]                                                                                                     | Diagnosis            | ICD-10-CM        |
| D80.5                          | Immunodeficiency with increased immunoglobulin M [IgM]                                                                                             | Diagnosis            | ICD-10-CM        |
| D80.6                          | Antibody deficiency with near-normal immunoglobulins or with hyperimmunoglobulinemia                                                               | Diagnosis            | ICD-10-CM        |
| D80.7                          | Transient hypogammaglobulinemia of infancy                                                                                                         | Diagnosis            | ICD-10-CM        |
| D80.8                          | Other immunodeficiencies with predominantly antibody defects                                                                                       | Diagnosis            | ICD-10-CM        |
| D80.9                          | Immunodeficiency with predominantly antibody defects, unspecified                                                                                  | Diagnosis            | ICD-10-CM        |
| D81.0                          | Severe combined immunodeficiency [SCID] with reticular dysgenesis                                                                                  | Diagnosis            | ICD-10-CM        |
| D81.1                          | Severe combined immunodeficiency [SCID] with low T- and B-cell numbers                                                                             | Diagnosis            | ICD-10-CM        |
| D81.2                          | Severe combined immunodeficiency [SCID] with low or normal B-cell numbers                                                                          | Diagnosis            | ICD-10-CM        |
| D81.3                          | Adenosine deaminase [ADA] deficiency                                                                                                               | Diagnosis            | ICD-10-CM        |
| D81.4                          | Nezelof's syndrome                                                                                                                                 | Diagnosis            | ICD-10-CM        |
| D81.5                          | Purine nucleoside phosphorylase [PNP] deficiency                                                                                                   | Diagnosis            | ICD-10-CM        |
| D81.6                          | Major histocompatibility complex class I deficiency                                                                                                | Diagnosis            | ICD-10-CM        |
| D81.7                          | Major histocompatibility complex class II deficiency                                                                                               | Diagnosis            | ICD-10-CM        |
| D81.810                        | Biotinidase deficiency                                                                                                                             | Diagnosis            | ICD-10-CM        |
| D81.818                        | Other biotin-dependent carboxylase deficiency                                                                                                      | Diagnosis            | ICD-10-CM        |
| D81.819                        | Biotin-dependent carboxylase deficiency, unspecified                                                                                               | Diagnosis            | ICD-10-CM        |
| D81.89                         | Other combined immunodeficiencies                                                                                                                  | Diagnosis            | ICD-10-CM        |
| D81.9                          | Combined immunodeficiency, unspecified                                                                                                             | Diagnosis            | ICD-10-CM        |
| D82.0                          | Wiskott-Aldrich syndrome                                                                                                                           | Diagnosis            | ICD-10-CM        |
| D82.1                          | Di George's syndrome                                                                                                                               | Diagnosis            | ICD-10-CM        |
| D82.2                          | Immunodeficiency with short-limbed stature                                                                                                         | Diagnosis            | ICD-10-CM        |
| D82.3                          | Immunodeficiency following hereditary defective response to Epstein-Barr virus                                                                     | Diagnosis            | ICD-10-CM        |
| D82.4                          | Hyperimmunoglobulin E [IgE] syndrome                                                                                                               | Diagnosis            | ICD-10-CM        |
| D82.8                          | Immunodeficiency associated with other specified major defects                                                                                     | Diagnosis            | ICD-10-CM        |
| D82.9                          | Immunodeficiency associated with major defect, unspecified                                                                                         | Diagnosis            | ICD-10-CM        |
| D83.0                          | Common variable immunodeficiency with predominant abnormalities of B-cell numbers and function                                                     | Diagnosis            | ICD-10-CM        |

| <b>Code</b> | <b>Description</b>                                                                  | <b>Code Category</b> | <b>Code Type</b> |
|-------------|-------------------------------------------------------------------------------------|----------------------|------------------|
| D83.1       | Common variable immunodeficiency with predominant immunoregulatory T-cell disorders | Diagnosis            | ICD-10-CM        |
| D83.2       | Common variable immunodeficiency with autoantibodies to B- or T-cells               | Diagnosis            | ICD-10-CM        |
| D83.8       | Other common variable immunodeficiencies                                            | Diagnosis            | ICD-10-CM        |
| D83.9       | Common variable immunodeficiency, unspecified                                       | Diagnosis            | ICD-10-CM        |
| D84.0       | Lymphocyte function antigen-1 [LFA-1] defect                                        | Diagnosis            | ICD-10-CM        |
| D84.1       | Defects in the complement system                                                    | Diagnosis            | ICD-10-CM        |
| D84.8       | Other specified immunodeficiencies                                                  | Diagnosis            | ICD-10-CM        |
| D84.9       | Immunodeficiency, unspecified                                                       | Diagnosis            | ICD-10-CM        |
| D89.0       | Polyclonal hypergammaglobulinemia                                                   | Diagnosis            | ICD-10-CM        |
| D89.1       | Cryoglobulinemia                                                                    | Diagnosis            | ICD-10-CM        |
| D89.2       | Hypergammaglobulinemia, unspecified                                                 | Diagnosis            | ICD-10-CM        |
| D89.3       | Immune reconstitution syndrome                                                      | Diagnosis            | ICD-10-CM        |
| D89.40      | Mast cell activation, unspecified                                                   | Diagnosis            | ICD-10-CM        |
| D89.41      | Monoclonal mast cell activation syndrome                                            | Diagnosis            | ICD-10-CM        |
| D89.42      | Idiopathic mast cell activation syndrome                                            | Diagnosis            | ICD-10-CM        |
| D89.43      | Secondary mast cell activation                                                      | Diagnosis            | ICD-10-CM        |
| D89.49      | Other mast cell activation disorder                                                 | Diagnosis            | ICD-10-CM        |
| D89.810     | Acute graft-versus-host disease                                                     | Diagnosis            | ICD-10-CM        |
| D89.811     | Chronic graft-versus-host disease                                                   | Diagnosis            | ICD-10-CM        |
| D89.812     | Acute on chronic graft-versus-host disease                                          | Diagnosis            | ICD-10-CM        |
| D89.813     | Graft-versus-host disease, unspecified                                              | Diagnosis            | ICD-10-CM        |
| D89.82      | Autoimmune lymphoproliferative syndrome [ALPS]                                      | Diagnosis            | ICD-10-CM        |
| D89.89      | Other specified disorders involving the immune mechanism, not elsewhere classified  | Diagnosis            | ICD-10-CM        |
| D89.9       | Disorder involving the immune mechanism, unspecified                                | Diagnosis            | ICD-10-CM        |
| D70.1       | Agranulocytosis secondary to cancer chemotherapy                                    | Diagnosis            | ICD-10-CM        |
| D70.2       | Other drug-induced agranulocytosis                                                  | Diagnosis            | ICD-10-CM        |
| D70.3       | Neutropenia due to infection                                                        | Diagnosis            | ICD-10-CM        |
| D70.4       | Cyclic neutropenia                                                                  | Diagnosis            | ICD-10-CM        |
| D70.8       | Other neutropenia                                                                   | Diagnosis            | ICD-10-CM        |
| D70.9       | Neutropenia, unspecified                                                            | Diagnosis            | ICD-10-CM        |
| D72.819     | Decreased white blood cell count, unspecified                                       | Diagnosis            | ICD-10-CM        |
| T86.91      | Unspecified transplanted organ and tissue rejection                                 | Diagnosis            | ICD-10-CM        |
| Z94         | Transplanted organ and tissue status                                                | Diagnosis            | ICD-10-CM        |
| Z94.0       | Kidney transplant status                                                            | Diagnosis            | ICD-10-CM        |
| Z94.1       | Heart transplant status                                                             | Diagnosis            | ICD-10-CM        |
| Z94.2       | Lung transplant status                                                              | Diagnosis            | ICD-10-CM        |
| Z94.3       | Heart and lungs transplant status                                                   | Diagnosis            | ICD-10-CM        |
| Z94.4       | Liver transplant status                                                             | Diagnosis            | ICD-10-CM        |
| Z94.5       | Skin transplant status                                                              | Diagnosis            | ICD-10-CM        |
| Z94.6       | Bone transplant status                                                              | Diagnosis            | ICD-10-CM        |
| Z94.7       | Corneal transplant status                                                           | Diagnosis            | ICD-10-CM        |
| Z94.8       | Other transplanted organ and tissue status                                          | Diagnosis            | ICD-10-CM        |
| Z94.81      | Bone marrow transplant status                                                       | Diagnosis            | ICD-10-CM        |



| <b>Code</b>             | <b>Description</b>                                                                         | <b>Code Category</b> | <b>Code Type</b> |
|-------------------------|--------------------------------------------------------------------------------------------|----------------------|------------------|
| Z94.82                  | Intestine transplant status                                                                | Diagnosis            | ICD-10-CM        |
| Z94.83                  | Pancreas transplant status                                                                 | Diagnosis            | ICD-10-CM        |
| Z94.84                  | Stem cells transplant status                                                               | Diagnosis            | ICD-10-CM        |
| Z94.89                  | Other transplanted organ and tissue status                                                 | Diagnosis            | ICD-10-CM        |
| Z94.9                   | Transplanted organ and tissue status, unspecified                                          | Diagnosis            | ICD-10-CM        |
| B20                     | Human immunodeficiency virus [HIV] disease                                                 | Diagnosis            | ICD-10-CM        |
| B97.35                  | Human immunodeficiency virus, type 2 [HIV 2] as the cause of diseases classified elsewhere | Diagnosis            | ICD-10-CM        |
| Z21                     | Asymptomatic human immunodeficiency virus [HIV] infection status                           | Diagnosis            | ICD-10-CM        |
| <b>Malignant Cancer</b> |                                                                                            |                      |                  |
| C00.0                   | Malignant neoplasm of external upper lip                                                   | Diagnosis            | ICD-10-CM        |
| C00.1                   | Malignant neoplasm of external lower lip                                                   | Diagnosis            | ICD-10-CM        |
| C00.2                   | Malignant neoplasm of external lip, unspecified                                            | Diagnosis            | ICD-10-CM        |
| C00.3                   | Malignant neoplasm of upper lip, inner aspect                                              | Diagnosis            | ICD-10-CM        |
| C00.4                   | Malignant neoplasm of lower lip, inner aspect                                              | Diagnosis            | ICD-10-CM        |
| C00.5                   | Malignant neoplasm of lip, unspecified, inner aspect                                       | Diagnosis            | ICD-10-CM        |
| C00.6                   | Malignant neoplasm of commissure of lip, unspecified                                       | Diagnosis            | ICD-10-CM        |
| C00.8                   | Malignant neoplasm of overlapping sites of lip                                             | Diagnosis            | ICD-10-CM        |
| C00.9                   | Malignant neoplasm of lip, unspecified                                                     | Diagnosis            | ICD-10-CM        |
| C01                     | Malignant neoplasm of base of tongue                                                       | Diagnosis            | ICD-10-CM        |
| C02.0                   | Malignant neoplasm of dorsal surface of tongue                                             | Diagnosis            | ICD-10-CM        |
| C02.1                   | Malignant neoplasm of border of tongue                                                     | Diagnosis            | ICD-10-CM        |
| C02.2                   | Malignant neoplasm of ventral surface of tongue                                            | Diagnosis            | ICD-10-CM        |
| C02.3                   | Malignant neoplasm of anterior two-thirds of tongue, part unspecified                      | Diagnosis            | ICD-10-CM        |
| C02.4                   | Malignant neoplasm of lingual tonsil                                                       | Diagnosis            | ICD-10-CM        |
| C02.8                   | Malignant neoplasm of overlapping sites of tongue                                          | Diagnosis            | ICD-10-CM        |
| C02.9                   | Malignant neoplasm of tongue, unspecified                                                  | Diagnosis            | ICD-10-CM        |
| C03.0                   | Malignant neoplasm of upper gum                                                            | Diagnosis            | ICD-10-CM        |
| C03.1                   | Malignant neoplasm of lower gum                                                            | Diagnosis            | ICD-10-CM        |
| C03.9                   | Malignant neoplasm of gum, unspecified                                                     | Diagnosis            | ICD-10-CM        |
| C04.0                   | Malignant neoplasm of anterior floor of mouth                                              | Diagnosis            | ICD-10-CM        |
| C04.1                   | Malignant neoplasm of lateral floor of mouth                                               | Diagnosis            | ICD-10-CM        |
| C04.8                   | Malignant neoplasm of overlapping sites of floor of mouth                                  | Diagnosis            | ICD-10-CM        |
| C04.9                   | Malignant neoplasm of floor of mouth, unspecified                                          | Diagnosis            | ICD-10-CM        |
| C05.0                   | Malignant neoplasm of hard palate                                                          | Diagnosis            | ICD-10-CM        |
| C05.1                   | Malignant neoplasm of soft palate                                                          | Diagnosis            | ICD-10-CM        |
| C05.2                   | Malignant neoplasm of uvula                                                                | Diagnosis            | ICD-10-CM        |
| C05.8                   | Malignant neoplasm of overlapping sites of palate                                          | Diagnosis            | ICD-10-CM        |
| C05.9                   | Malignant neoplasm of palate, unspecified                                                  | Diagnosis            | ICD-10-CM        |
| C06.0                   | Malignant neoplasm of cheek mucosa                                                         | Diagnosis            | ICD-10-CM        |
| C06.1                   | Malignant neoplasm of vestibule of mouth                                                   | Diagnosis            | ICD-10-CM        |
| C06.2                   | Malignant neoplasm of retromolar area                                                      | Diagnosis            | ICD-10-CM        |
| C06.80                  | Malignant neoplasm of overlapping sites of unspecified parts of mouth                      | Diagnosis            | ICD-10-CM        |
| C06.89                  | Malignant neoplasm of overlapping sites of other parts of mouth                            | Diagnosis            | ICD-10-CM        |
| C06.9                   | Malignant neoplasm of mouth, unspecified                                                   | Diagnosis            | ICD-10-CM        |

| <b>Code</b> | <b>Description</b>                                                      | <b>Code Category</b> | <b>Code Type</b> |
|-------------|-------------------------------------------------------------------------|----------------------|------------------|
| C07         | Malignant neoplasm of parotid gland                                     | Diagnosis            | ICD-10-CM        |
| C08.0       | Malignant neoplasm of submandibular gland                               | Diagnosis            | ICD-10-CM        |
| C08.1       | Malignant neoplasm of sublingual gland                                  | Diagnosis            | ICD-10-CM        |
| C08.9       | Malignant neoplasm of major salivary gland, unspecified                 | Diagnosis            | ICD-10-CM        |
| C09.0       | Malignant neoplasm of tonsillar fossa                                   | Diagnosis            | ICD-10-CM        |
| C09.1       | Malignant neoplasm of tonsillar pillar (anterior) (posterior)           | Diagnosis            | ICD-10-CM        |
| C09.8       | Malignant neoplasm of overlapping sites of tonsil                       | Diagnosis            | ICD-10-CM        |
| C09.9       | Malignant neoplasm of tonsil, unspecified                               | Diagnosis            | ICD-10-CM        |
| C10.0       | Malignant neoplasm of vallecula                                         | Diagnosis            | ICD-10-CM        |
| C10.1       | Malignant neoplasm of anterior surface of epiglottis                    | Diagnosis            | ICD-10-CM        |
| C10.2       | Malignant neoplasm of lateral wall of oropharynx                        | Diagnosis            | ICD-10-CM        |
| C10.3       | Malignant neoplasm of posterior wall of oropharynx                      | Diagnosis            | ICD-10-CM        |
| C10.4       | Malignant neoplasm of branchial cleft                                   | Diagnosis            | ICD-10-CM        |
| C10.8       | Malignant neoplasm of overlapping sites of oropharynx                   | Diagnosis            | ICD-10-CM        |
| C10.9       | Malignant neoplasm of oropharynx, unspecified                           | Diagnosis            | ICD-10-CM        |
| C11.0       | Malignant neoplasm of superior wall of nasopharynx                      | Diagnosis            | ICD-10-CM        |
| C11.1       | Malignant neoplasm of posterior wall of nasopharynx                     | Diagnosis            | ICD-10-CM        |
| C11.2       | Malignant neoplasm of lateral wall of nasopharynx                       | Diagnosis            | ICD-10-CM        |
| C11.3       | Malignant neoplasm of anterior wall of nasopharynx                      | Diagnosis            | ICD-10-CM        |
| C11.8       | Malignant neoplasm of overlapping sites of nasopharynx                  | Diagnosis            | ICD-10-CM        |
| C11.9       | Malignant neoplasm of nasopharynx, unspecified                          | Diagnosis            | ICD-10-CM        |
| C12         | Malignant neoplasm of pyriform sinus                                    | Diagnosis            | ICD-10-CM        |
| C13.0       | Malignant neoplasm of postcricoid region                                | Diagnosis            | ICD-10-CM        |
| C13.1       | Malignant neoplasm of aryepiglottic fold, hypopharyngeal aspect         | Diagnosis            | ICD-10-CM        |
| C13.2       | Malignant neoplasm of posterior wall of hypopharynx                     | Diagnosis            | ICD-10-CM        |
| C13.8       | Malignant neoplasm of overlapping sites of hypopharynx                  | Diagnosis            | ICD-10-CM        |
| C13.9       | Malignant neoplasm of hypopharynx, unspecified                          | Diagnosis            | ICD-10-CM        |
| C14.0       | Malignant neoplasm of pharynx, unspecified                              | Diagnosis            | ICD-10-CM        |
| C14.2       | Malignant neoplasm of Waldeyer's ring                                   | Diagnosis            | ICD-10-CM        |
| C14.8       | Malignant neoplasm of overlapping sites of lip, oral cavity and pharynx | Diagnosis            | ICD-10-CM        |
| C15.3       | Malignant neoplasm of upper third of esophagus                          | Diagnosis            | ICD-10-CM        |
| C15.4       | Malignant neoplasm of middle third of esophagus                         | Diagnosis            | ICD-10-CM        |
| C15.5       | Malignant neoplasm of lower third of esophagus                          | Diagnosis            | ICD-10-CM        |
| C15.8       | Malignant neoplasm of overlapping sites of esophagus                    | Diagnosis            | ICD-10-CM        |
| C15.9       | Malignant neoplasm of esophagus, unspecified                            | Diagnosis            | ICD-10-CM        |
| C16.0       | Malignant neoplasm of cardia                                            | Diagnosis            | ICD-10-CM        |
| C16.1       | Malignant neoplasm of fundus of stomach                                 | Diagnosis            | ICD-10-CM        |
| C16.2       | Malignant neoplasm of body of stomach                                   | Diagnosis            | ICD-10-CM        |
| C16.3       | Malignant neoplasm of pyloric antrum                                    | Diagnosis            | ICD-10-CM        |
| C16.4       | Malignant neoplasm of pylorus                                           | Diagnosis            | ICD-10-CM        |
| C16.5       | Malignant neoplasm of lesser curvature of stomach, unspecified          | Diagnosis            | ICD-10-CM        |
| C16.6       | Malignant neoplasm of greater curvature of stomach, unspecified         | Diagnosis            | ICD-10-CM        |
| C16.8       | Malignant neoplasm of overlapping sites of stomach                      | Diagnosis            | ICD-10-CM        |
| C16.9       | Malignant neoplasm of stomach, unspecified                              | Diagnosis            | ICD-10-CM        |
| C17.0       | Malignant neoplasm of duodenum                                          | Diagnosis            | ICD-10-CM        |

| <b>Code</b> | <b>Description</b>                                                     | <b>Code Category</b> | <b>Code Type</b> |
|-------------|------------------------------------------------------------------------|----------------------|------------------|
| C17.1       | Malignant neoplasm of jejunum                                          | Diagnosis            | ICD-10-CM        |
| C17.2       | Malignant neoplasm of ileum                                            | Diagnosis            | ICD-10-CM        |
| C17.3       | Meckel's diverticulum, malignant                                       | Diagnosis            | ICD-10-CM        |
| C17.8       | Malignant neoplasm of overlapping sites of small intestine             | Diagnosis            | ICD-10-CM        |
| C17.9       | Malignant neoplasm of small intestine, unspecified                     | Diagnosis            | ICD-10-CM        |
| C18.0       | Malignant neoplasm of cecum                                            | Diagnosis            | ICD-10-CM        |
| C18.1       | Malignant neoplasm of appendix                                         | Diagnosis            | ICD-10-CM        |
| C18.2       | Malignant neoplasm of ascending colon                                  | Diagnosis            | ICD-10-CM        |
| C18.3       | Malignant neoplasm of hepatic flexure                                  | Diagnosis            | ICD-10-CM        |
| C18.4       | Malignant neoplasm of transverse colon                                 | Diagnosis            | ICD-10-CM        |
| C18.5       | Malignant neoplasm of splenic flexure                                  | Diagnosis            | ICD-10-CM        |
| C18.6       | Malignant neoplasm of descending colon                                 | Diagnosis            | ICD-10-CM        |
| C18.7       | Malignant neoplasm of sigmoid colon                                    | Diagnosis            | ICD-10-CM        |
| C18.8       | Malignant neoplasm of overlapping sites of colon                       | Diagnosis            | ICD-10-CM        |
| C18.9       | Malignant neoplasm of colon, unspecified                               | Diagnosis            | ICD-10-CM        |
| C19         | Malignant neoplasm of rectosigmoid junction                            | Diagnosis            | ICD-10-CM        |
| C20         | Malignant neoplasm of rectum                                           | Diagnosis            | ICD-10-CM        |
| C21.0       | Malignant neoplasm of anus, unspecified                                | Diagnosis            | ICD-10-CM        |
| C21.1       | Malignant neoplasm of anal canal                                       | Diagnosis            | ICD-10-CM        |
| C21.2       | Malignant neoplasm of cloacogenic zone                                 | Diagnosis            | ICD-10-CM        |
| C21.8       | Malignant neoplasm of overlapping sites of rectum, anus and anal canal | Diagnosis            | ICD-10-CM        |
| C22.0       | Liver cell carcinoma                                                   | Diagnosis            | ICD-10-CM        |
| C22.1       | Intrahepatic bile duct carcinoma                                       | Diagnosis            | ICD-10-CM        |
| C22.2       | Hepatoblastoma                                                         | Diagnosis            | ICD-10-CM        |
| C22.3       | Angiosarcoma of liver                                                  | Diagnosis            | ICD-10-CM        |
| C22.4       | Other sarcomas of liver                                                | Diagnosis            | ICD-10-CM        |
| C22.7       | Other specified carcinomas of liver                                    | Diagnosis            | ICD-10-CM        |
| C22.8       | Malignant neoplasm of liver, primary, unspecified as to type           | Diagnosis            | ICD-10-CM        |
| C22.9       | Malignant neoplasm of liver, not specified as primary or secondary     | Diagnosis            | ICD-10-CM        |
| C23         | Malignant neoplasm of gallbladder                                      | Diagnosis            | ICD-10-CM        |
| C24.0       | Malignant neoplasm of extrahepatic bile duct                           | Diagnosis            | ICD-10-CM        |
| C24.1       | Malignant neoplasm of ampulla of Vater                                 | Diagnosis            | ICD-10-CM        |
| C24.8       | Malignant neoplasm of overlapping sites of biliary tract               | Diagnosis            | ICD-10-CM        |
| C24.9       | Malignant neoplasm of biliary tract, unspecified                       | Diagnosis            | ICD-10-CM        |
| C25.0       | Malignant neoplasm of head of pancreas                                 | Diagnosis            | ICD-10-CM        |
| C25.1       | Malignant neoplasm of body of pancreas                                 | Diagnosis            | ICD-10-CM        |
| C25.2       | Malignant neoplasm of tail of pancreas                                 | Diagnosis            | ICD-10-CM        |
| C25.3       | Malignant neoplasm of pancreatic duct                                  | Diagnosis            | ICD-10-CM        |
| C25.4       | Malignant neoplasm of endocrine pancreas                               | Diagnosis            | ICD-10-CM        |
| C25.7       | Malignant neoplasm of other parts of pancreas                          | Diagnosis            | ICD-10-CM        |
| C25.8       | Malignant neoplasm of overlapping sites of pancreas                    | Diagnosis            | ICD-10-CM        |
| C25.9       | Malignant neoplasm of pancreas, unspecified                            | Diagnosis            | ICD-10-CM        |
| C26.0       | Malignant neoplasm of intestinal tract, part unspecified               | Diagnosis            | ICD-10-CM        |
| C26.1       | Malignant neoplasm of spleen                                           | Diagnosis            | ICD-10-CM        |
| C26.9       | Malignant neoplasm of ill-defined sites within the digestive system    | Diagnosis            | ICD-10-CM        |

| <b>Code</b> | <b>Description</b>                                                       | <b>Code Category</b> | <b>Code Type</b> |
|-------------|--------------------------------------------------------------------------|----------------------|------------------|
| C30.0       | Malignant neoplasm of nasal cavity                                       | Diagnosis            | ICD-10-CM        |
| C30.1       | Malignant neoplasm of middle ear                                         | Diagnosis            | ICD-10-CM        |
| C31.0       | Malignant neoplasm of maxillary sinus                                    | Diagnosis            | ICD-10-CM        |
| C31.1       | Malignant neoplasm of ethmoidal sinus                                    | Diagnosis            | ICD-10-CM        |
| C31.2       | Malignant neoplasm of frontal sinus                                      | Diagnosis            | ICD-10-CM        |
| C31.3       | Malignant neoplasm of sphenoid sinus                                     | Diagnosis            | ICD-10-CM        |
| C31.8       | Malignant neoplasm of overlapping sites of accessory sinuses             | Diagnosis            | ICD-10-CM        |
| C31.9       | Malignant neoplasm of accessory sinus, unspecified                       | Diagnosis            | ICD-10-CM        |
| C32.0       | Malignant neoplasm of glottis                                            | Diagnosis            | ICD-10-CM        |
| C32.1       | Malignant neoplasm of supraglottis                                       | Diagnosis            | ICD-10-CM        |
| C32.2       | Malignant neoplasm of subglottis                                         | Diagnosis            | ICD-10-CM        |
| C32.3       | Malignant neoplasm of laryngeal cartilage                                | Diagnosis            | ICD-10-CM        |
| C32.8       | Malignant neoplasm of overlapping sites of larynx                        | Diagnosis            | ICD-10-CM        |
| C32.9       | Malignant neoplasm of larynx, unspecified                                | Diagnosis            | ICD-10-CM        |
| C33         | Malignant neoplasm of trachea                                            | Diagnosis            | ICD-10-CM        |
| C34.00      | Malignant neoplasm of unspecified main bronchus                          | Diagnosis            | ICD-10-CM        |
| C34.01      | Malignant neoplasm of right main bronchus                                | Diagnosis            | ICD-10-CM        |
| C34.02      | Malignant neoplasm of left main bronchus                                 | Diagnosis            | ICD-10-CM        |
| C34.10      | Malignant neoplasm of upper lobe, unspecified bronchus or lung           | Diagnosis            | ICD-10-CM        |
| C34.11      | Malignant neoplasm of upper lobe, right bronchus or lung                 | Diagnosis            | ICD-10-CM        |
| C34.12      | Malignant neoplasm of upper lobe, left bronchus or lung                  | Diagnosis            | ICD-10-CM        |
| C34.2       | Malignant neoplasm of middle lobe, bronchus or lung                      | Diagnosis            | ICD-10-CM        |
| C34.30      | Malignant neoplasm of lower lobe, unspecified bronchus or lung           | Diagnosis            | ICD-10-CM        |
| C34.31      | Malignant neoplasm of lower lobe, right bronchus or lung                 | Diagnosis            | ICD-10-CM        |
| C34.32      | Malignant neoplasm of lower lobe, left bronchus or lung                  | Diagnosis            | ICD-10-CM        |
| C34.80      | Malignant neoplasm of overlapping sites of unspecified bronchus and lung | Diagnosis            | ICD-10-CM        |
| C34.81      | Malignant neoplasm of overlapping sites of right bronchus and lung       | Diagnosis            | ICD-10-CM        |
| C34.82      | Malignant neoplasm of overlapping sites of left bronchus and lung        | Diagnosis            | ICD-10-CM        |
| C34.90      | Malignant neoplasm of unspecified part of unspecified bronchus or lung   | Diagnosis            | ICD-10-CM        |
| C34.91      | Malignant neoplasm of unspecified part of right bronchus or lung         | Diagnosis            | ICD-10-CM        |
| C34.92      | Malignant neoplasm of unspecified part of left bronchus or lung          | Diagnosis            | ICD-10-CM        |
| C37         | Malignant neoplasm of thymus                                             | Diagnosis            | ICD-10-CM        |
| C38.0       | Malignant neoplasm of heart                                              | Diagnosis            | ICD-10-CM        |
| C38.1       | Malignant neoplasm of anterior mediastinum                               | Diagnosis            | ICD-10-CM        |
| C38.2       | Malignant neoplasm of posterior mediastinum                              | Diagnosis            | ICD-10-CM        |
| C38.3       | Malignant neoplasm of mediastinum, part unspecified                      | Diagnosis            | ICD-10-CM        |
| C38.4       | Malignant neoplasm of pleura                                             | Diagnosis            | ICD-10-CM        |
| C38.8       | Malignant neoplasm of overlapping sites of heart, mediastinum and pleura | Diagnosis            | ICD-10-CM        |
| C39.0       | Malignant neoplasm of upper respiratory tract, part unspecified          | Diagnosis            | ICD-10-CM        |
| C39.9       | Malignant neoplasm of lower respiratory tract, part unspecified          | Diagnosis            | ICD-10-CM        |
| C40.00      | Malignant neoplasm of scapula and long bones of unspecified upper limb   | Diagnosis            | ICD-10-CM        |
| C40.01      | Malignant neoplasm of scapula and long bones of right upper limb         | Diagnosis            | ICD-10-CM        |
| C40.02      | Malignant neoplasm of scapula and long bones of left upper limb          | Diagnosis            | ICD-10-CM        |
| C40.10      | Malignant neoplasm of short bones of unspecified upper limb              | Diagnosis            | ICD-10-CM        |
| C40.11      | Malignant neoplasm of short bones of right upper limb                    | Diagnosis            | ICD-10-CM        |

| <b>Code</b> | <b>Description</b>                                                                          | <b>Code Category</b> | <b>Code Type</b> |
|-------------|---------------------------------------------------------------------------------------------|----------------------|------------------|
| C40.12      | Malignant neoplasm of short bones of left upper limb                                        | Diagnosis            | ICD-10-CM        |
| C40.20      | Malignant neoplasm of long bones of unspecified lower limb                                  | Diagnosis            | ICD-10-CM        |
| C40.21      | Malignant neoplasm of long bones of right lower limb                                        | Diagnosis            | ICD-10-CM        |
| C40.22      | Malignant neoplasm of long bones of left lower limb                                         | Diagnosis            | ICD-10-CM        |
| C40.30      | Malignant neoplasm of short bones of unspecified lower limb                                 | Diagnosis            | ICD-10-CM        |
| C40.31      | Malignant neoplasm of short bones of right lower limb                                       | Diagnosis            | ICD-10-CM        |
| C40.32      | Malignant neoplasm of short bones of left lower limb                                        | Diagnosis            | ICD-10-CM        |
| C40.80      | Malignant neoplasm of overlapping sites of bone and articular cartilage of unspecified limb | Diagnosis            | ICD-10-CM        |
| C40.81      | Malignant neoplasm of overlapping sites of bone and articular cartilage of right limb       | Diagnosis            | ICD-10-CM        |
| C40.82      | Malignant neoplasm of overlapping sites of bone and articular cartilage of left limb        | Diagnosis            | ICD-10-CM        |
| C40.90      | Malignant neoplasm of unspecified bones and articular cartilage of unspecified limb         | Diagnosis            | ICD-10-CM        |
| C40.91      | Malignant neoplasm of unspecified bones and articular cartilage of right limb               | Diagnosis            | ICD-10-CM        |
| C40.92      | Malignant neoplasm of unspecified bones and articular cartilage of left limb                | Diagnosis            | ICD-10-CM        |
| C41.0       | Malignant neoplasm of bones of skull and face                                               | Diagnosis            | ICD-10-CM        |
| C41.1       | Malignant neoplasm of mandible                                                              | Diagnosis            | ICD-10-CM        |
| C41.2       | Malignant neoplasm of vertebral column                                                      | Diagnosis            | ICD-10-CM        |
| C41.3       | Malignant neoplasm of ribs, sternum and clavicle                                            | Diagnosis            | ICD-10-CM        |
| C41.4       | Malignant neoplasm of pelvic bones, sacrum and coccyx                                       | Diagnosis            | ICD-10-CM        |
| C41.9       | Malignant neoplasm of bone and articular cartilage, unspecified                             | Diagnosis            | ICD-10-CM        |
| C43.0       | Malignant melanoma of lip                                                                   | Diagnosis            | ICD-10-CM        |
| C43.10      | Malignant melanoma of unspecified eyelid, including canthus                                 | Diagnosis            | ICD-10-CM        |
| C43.11      | Malignant melanoma of right eyelid, including canthus                                       | Diagnosis            | ICD-10-CM        |
| C43.12      | Malignant melanoma of left eyelid, including canthus                                        | Diagnosis            | ICD-10-CM        |
| C43.20      | Malignant melanoma of unspecified ear and external auricular canal                          | Diagnosis            | ICD-10-CM        |
| C43.21      | Malignant melanoma of right ear and external auricular canal                                | Diagnosis            | ICD-10-CM        |
| C43.22      | Malignant melanoma of left ear and external auricular canal                                 | Diagnosis            | ICD-10-CM        |
| C43.30      | Malignant melanoma of unspecified part of face                                              | Diagnosis            | ICD-10-CM        |
| C43.31      | Malignant melanoma of nose                                                                  | Diagnosis            | ICD-10-CM        |
| C43.39      | Malignant melanoma of other parts of face                                                   | Diagnosis            | ICD-10-CM        |
| C43.4       | Malignant melanoma of scalp and neck                                                        | Diagnosis            | ICD-10-CM        |
| C43.51      | Malignant melanoma of anal skin                                                             | Diagnosis            | ICD-10-CM        |
| C43.52      | Malignant melanoma of skin of breast                                                        | Diagnosis            | ICD-10-CM        |
| C43.59      | Malignant melanoma of other part of trunk                                                   | Diagnosis            | ICD-10-CM        |
| C43.60      | Malignant melanoma of unspecified upper limb, including shoulder                            | Diagnosis            | ICD-10-CM        |
| C43.61      | Malignant melanoma of right upper limb, including shoulder                                  | Diagnosis            | ICD-10-CM        |
| C43.62      | Malignant melanoma of left upper limb, including shoulder                                   | Diagnosis            | ICD-10-CM        |
| C43.70      | Malignant melanoma of unspecified lower limb, including hip                                 | Diagnosis            | ICD-10-CM        |
| C43.71      | Malignant melanoma of right lower limb, including hip                                       | Diagnosis            | ICD-10-CM        |
| C43.72      | Malignant melanoma of left lower limb, including hip                                        | Diagnosis            | ICD-10-CM        |
| C43.8       | Malignant melanoma of overlapping sites of skin                                             | Diagnosis            | ICD-10-CM        |
| C43.9       | Malignant melanoma of skin, unspecified                                                     | Diagnosis            | ICD-10-CM        |
| C45.0       | Mesothelioma of pleura                                                                      | Diagnosis            | ICD-10-CM        |
| C45.1       | Mesothelioma of peritoneum                                                                  | Diagnosis            | ICD-10-CM        |
| C45.2       | Mesothelioma of pericardium                                                                 | Diagnosis            | ICD-10-CM        |

| Code   | Description                                                                                    | Code      |           |
|--------|------------------------------------------------------------------------------------------------|-----------|-----------|
|        |                                                                                                | Category  | Code Type |
| C45.7  | Mesothelioma of other sites                                                                    | Diagnosis | ICD-10-CM |
| C45.9  | Mesothelioma, unspecified                                                                      | Diagnosis | ICD-10-CM |
| C46.0  | Kaposi's sarcoma of skin                                                                       | Diagnosis | ICD-10-CM |
| C46.1  | Kaposi's sarcoma of soft tissue                                                                | Diagnosis | ICD-10-CM |
| C46.2  | Kaposi's sarcoma of palate                                                                     | Diagnosis | ICD-10-CM |
| C46.3  | Kaposi's sarcoma of lymph nodes                                                                | Diagnosis | ICD-10-CM |
| C46.4  | Kaposi's sarcoma of gastrointestinal sites                                                     | Diagnosis | ICD-10-CM |
| C46.50 | Kaposi's sarcoma of unspecified lung                                                           | Diagnosis | ICD-10-CM |
| C46.51 | Kaposi's sarcoma of right lung                                                                 | Diagnosis | ICD-10-CM |
| C46.52 | Kaposi's sarcoma of left lung                                                                  | Diagnosis | ICD-10-CM |
| C46.7  | Kaposi's sarcoma of other sites                                                                | Diagnosis | ICD-10-CM |
| C46.9  | Kaposi's sarcoma, unspecified                                                                  | Diagnosis | ICD-10-CM |
| C47.0  | Malignant neoplasm of peripheral nerves of head, face and neck                                 | Diagnosis | ICD-10-CM |
| C47.10 | Malignant neoplasm of peripheral nerves of unspecified upper limb, including shoulder          | Diagnosis | ICD-10-CM |
| C47.11 | Malignant neoplasm of peripheral nerves of right upper limb, including shoulder                | Diagnosis | ICD-10-CM |
| C47.12 | Malignant neoplasm of peripheral nerves of left upper limb, including shoulder                 | Diagnosis | ICD-10-CM |
| C47.20 | Malignant neoplasm of peripheral nerves of unspecified lower limb, including hip               | Diagnosis | ICD-10-CM |
| C47.21 | Malignant neoplasm of peripheral nerves of right lower limb, including hip                     | Diagnosis | ICD-10-CM |
| C47.22 | Malignant neoplasm of peripheral nerves of left lower limb, including hip                      | Diagnosis | ICD-10-CM |
| C47.3  | Malignant neoplasm of peripheral nerves of thorax                                              | Diagnosis | ICD-10-CM |
| C47.4  | Malignant neoplasm of peripheral nerves of abdomen                                             | Diagnosis | ICD-10-CM |
| C47.5  | Malignant neoplasm of peripheral nerves of pelvis                                              | Diagnosis | ICD-10-CM |
| C47.6  | Malignant neoplasm of peripheral nerves of trunk, unspecified                                  | Diagnosis | ICD-10-CM |
| C47.8  | Malignant neoplasm of overlapping sites of peripheral nerves and autonomic nervous system      | Diagnosis | ICD-10-CM |
| C47.9  | Malignant neoplasm of peripheral nerves and autonomic nervous system, unspecified              | Diagnosis | ICD-10-CM |
| C48.0  | Malignant neoplasm of retroperitoneum                                                          | Diagnosis | ICD-10-CM |
| C48.1  | Malignant neoplasm of specified parts of peritoneum                                            | Diagnosis | ICD-10-CM |
| C48.2  | Malignant neoplasm of peritoneum, unspecified                                                  | Diagnosis | ICD-10-CM |
| C48.8  | Malignant neoplasm of overlapping sites of retroperitoneum and peritoneum                      | Diagnosis | ICD-10-CM |
| C49.0  | Malignant neoplasm of connective and soft tissue of head, face and neck                        | Diagnosis | ICD-10-CM |
| C49.10 | Malignant neoplasm of connective and soft tissue of unspecified upper limb, including shoulder | Diagnosis | ICD-10-CM |
| C49.11 | Malignant neoplasm of connective and soft tissue of right upper limb, including shoulder       | Diagnosis | ICD-10-CM |
| C49.12 | Malignant neoplasm of connective and soft tissue of left upper limb, including shoulder        | Diagnosis | ICD-10-CM |
| C49.20 | Malignant neoplasm of connective and soft tissue of unspecified lower limb, including hip      | Diagnosis | ICD-10-CM |
| C49.21 | Malignant neoplasm of connective and soft tissue of right lower limb, including hip            | Diagnosis | ICD-10-CM |
| C49.22 | Malignant neoplasm of connective and soft tissue of left lower limb, including hip             | Diagnosis | ICD-10-CM |
| C49.3  | Malignant neoplasm of connective and soft tissue of thorax                                     | Diagnosis | ICD-10-CM |
| C49.4  | Malignant neoplasm of connective and soft tissue of abdomen                                    | Diagnosis | ICD-10-CM |
| C49.5  | Malignant neoplasm of connective and soft tissue of pelvis                                     | Diagnosis | ICD-10-CM |

| <b>Code</b> | <b>Description</b>                                                      | <b>Code Category</b> | <b>Code Type</b> |
|-------------|-------------------------------------------------------------------------|----------------------|------------------|
| C49.6       | Malignant neoplasm of connective and soft tissue of trunk, unspecified  | Diagnosis            | ICD-10-CM        |
| C49.8       | Malignant neoplasm of overlapping sites of connective and soft tissue   | Diagnosis            | ICD-10-CM        |
| C49.9       | Malignant neoplasm of connective and soft tissue, unspecified           | Diagnosis            | ICD-10-CM        |
| C49.A0      | Gastrointestinal stromal tumor, unspecified site                        | Diagnosis            | ICD-10-CM        |
| C49.A1      | Gastrointestinal stromal tumor of esophagus                             | Diagnosis            | ICD-10-CM        |
| C49.A2      | Gastrointestinal stromal tumor of stomach                               | Diagnosis            | ICD-10-CM        |
| C49.A3      | Gastrointestinal stromal tumor of small intestine                       | Diagnosis            | ICD-10-CM        |
| C49.A4      | Gastrointestinal stromal tumor of large intestine                       | Diagnosis            | ICD-10-CM        |
| C49.A5      | Gastrointestinal stromal tumor of rectum                                | Diagnosis            | ICD-10-CM        |
| C49.A9      | Gastrointestinal stromal tumor of other sites                           | Diagnosis            | ICD-10-CM        |
| C50.011     | Malignant neoplasm of nipple and areola, right female breast            | Diagnosis            | ICD-10-CM        |
| C50.012     | Malignant neoplasm of nipple and areola, left female breast             | Diagnosis            | ICD-10-CM        |
| C50.019     | Malignant neoplasm of nipple and areola, unspecified female breast      | Diagnosis            | ICD-10-CM        |
| C50.021     | Malignant neoplasm of nipple and areola, right male breast              | Diagnosis            | ICD-10-CM        |
| C50.022     | Malignant neoplasm of nipple and areola, left male breast               | Diagnosis            | ICD-10-CM        |
| C50.029     | Malignant neoplasm of nipple and areola, unspecified male breast        | Diagnosis            | ICD-10-CM        |
| C50.111     | Malignant neoplasm of central portion of right female breast            | Diagnosis            | ICD-10-CM        |
| C50.112     | Malignant neoplasm of central portion of left female breast             | Diagnosis            | ICD-10-CM        |
| C50.119     | Malignant neoplasm of central portion of unspecified female breast      | Diagnosis            | ICD-10-CM        |
| C50.121     | Malignant neoplasm of central portion of right male breast              | Diagnosis            | ICD-10-CM        |
| C50.122     | Malignant neoplasm of central portion of left male breast               | Diagnosis            | ICD-10-CM        |
| C50.129     | Malignant neoplasm of central portion of unspecified male breast        | Diagnosis            | ICD-10-CM        |
| C50.211     | Malignant neoplasm of upper-inner quadrant of right female breast       | Diagnosis            | ICD-10-CM        |
| C50.212     | Malignant neoplasm of upper-inner quadrant of left female breast        | Diagnosis            | ICD-10-CM        |
| C50.219     | Malignant neoplasm of upper-inner quadrant of unspecified female breast | Diagnosis            | ICD-10-CM        |
| C50.221     | Malignant neoplasm of upper-inner quadrant of right male breast         | Diagnosis            | ICD-10-CM        |
| C50.222     | Malignant neoplasm of upper-inner quadrant of left male breast          | Diagnosis            | ICD-10-CM        |
| C50.229     | Malignant neoplasm of upper-inner quadrant of unspecified male breast   | Diagnosis            | ICD-10-CM        |
| C50.311     | Malignant neoplasm of lower-inner quadrant of right female breast       | Diagnosis            | ICD-10-CM        |
| C50.312     | Malignant neoplasm of lower-inner quadrant of left female breast        | Diagnosis            | ICD-10-CM        |
| C50.319     | Malignant neoplasm of lower-inner quadrant of unspecified female breast | Diagnosis            | ICD-10-CM        |
| C50.321     | Malignant neoplasm of lower-inner quadrant of right male breast         | Diagnosis            | ICD-10-CM        |
| C50.322     | Malignant neoplasm of lower-inner quadrant of left male breast          | Diagnosis            | ICD-10-CM        |
| C50.329     | Malignant neoplasm of lower-inner quadrant of unspecified male breast   | Diagnosis            | ICD-10-CM        |
| C50.411     | Malignant neoplasm of upper-outer quadrant of right female breast       | Diagnosis            | ICD-10-CM        |
| C50.412     | Malignant neoplasm of upper-outer quadrant of left female breast        | Diagnosis            | ICD-10-CM        |
| C50.419     | Malignant neoplasm of upper-outer quadrant of unspecified female breast | Diagnosis            | ICD-10-CM        |
| C50.421     | Malignant neoplasm of upper-outer quadrant of right male breast         | Diagnosis            | ICD-10-CM        |
| C50.422     | Malignant neoplasm of upper-outer quadrant of left male breast          | Diagnosis            | ICD-10-CM        |
| C50.429     | Malignant neoplasm of upper-outer quadrant of unspecified male breast   | Diagnosis            | ICD-10-CM        |
| C50.511     | Malignant neoplasm of lower-outer quadrant of right female breast       | Diagnosis            | ICD-10-CM        |
| C50.512     | Malignant neoplasm of lower-outer quadrant of left female breast        | Diagnosis            | ICD-10-CM        |
| C50.519     | Malignant neoplasm of lower-outer quadrant of unspecified female breast | Diagnosis            | ICD-10-CM        |
| C50.521     | Malignant neoplasm of lower-outer quadrant of right male breast         | Diagnosis            | ICD-10-CM        |
| C50.522     | Malignant neoplasm of lower-outer quadrant of left male breast          | Diagnosis            | ICD-10-CM        |

| <b>Code</b> | <b>Description</b>                                                    | <b>Code Category</b> | <b>Code Type</b> |
|-------------|-----------------------------------------------------------------------|----------------------|------------------|
| C50.529     | Malignant neoplasm of lower-outer quadrant of unspecified male breast | Diagnosis            | ICD-10-CM        |
| C50.611     | Malignant neoplasm of axillary tail of right female breast            | Diagnosis            | ICD-10-CM        |
| C50.612     | Malignant neoplasm of axillary tail of left female breast             | Diagnosis            | ICD-10-CM        |
| C50.619     | Malignant neoplasm of axillary tail of unspecified female breast      | Diagnosis            | ICD-10-CM        |
| C50.621     | Malignant neoplasm of axillary tail of right male breast              | Diagnosis            | ICD-10-CM        |
| C50.622     | Malignant neoplasm of axillary tail of left male breast               | Diagnosis            | ICD-10-CM        |
| C50.629     | Malignant neoplasm of axillary tail of unspecified male breast        | Diagnosis            | ICD-10-CM        |
| C50.811     | Malignant neoplasm of overlapping sites of right female breast        | Diagnosis            | ICD-10-CM        |
| C50.812     | Malignant neoplasm of overlapping sites of left female breast         | Diagnosis            | ICD-10-CM        |
| C50.819     | Malignant neoplasm of overlapping sites of unspecified female breast  | Diagnosis            | ICD-10-CM        |
| C50.821     | Malignant neoplasm of overlapping sites of right male breast          | Diagnosis            | ICD-10-CM        |
| C50.822     | Malignant neoplasm of overlapping sites of left male breast           | Diagnosis            | ICD-10-CM        |
| C50.829     | Malignant neoplasm of overlapping sites of unspecified male breast    | Diagnosis            | ICD-10-CM        |
| C50.911     | Malignant neoplasm of unspecified site of right female breast         | Diagnosis            | ICD-10-CM        |
| C50.912     | Malignant neoplasm of unspecified site of left female breast          | Diagnosis            | ICD-10-CM        |
| C50.919     | Malignant neoplasm of unspecified site of unspecified female breast   | Diagnosis            | ICD-10-CM        |
| C50.921     | Malignant neoplasm of unspecified site of right male breast           | Diagnosis            | ICD-10-CM        |
| C50.922     | Malignant neoplasm of unspecified site of left male breast            | Diagnosis            | ICD-10-CM        |
| C50.929     | Malignant neoplasm of unspecified site of unspecified male breast     | Diagnosis            | ICD-10-CM        |
| C51.0       | Malignant neoplasm of labium majus                                    | Diagnosis            | ICD-10-CM        |
| C51.1       | Malignant neoplasm of labium minus                                    | Diagnosis            | ICD-10-CM        |
| C51.2       | Malignant neoplasm of clitoris                                        | Diagnosis            | ICD-10-CM        |
| C51.8       | Malignant neoplasm of overlapping sites of vulva                      | Diagnosis            | ICD-10-CM        |
| C51.9       | Malignant neoplasm of vulva, unspecified                              | Diagnosis            | ICD-10-CM        |
| C52         | Malignant neoplasm of vagina                                          | Diagnosis            | ICD-10-CM        |
| C53.0       | Malignant neoplasm of endocervix                                      | Diagnosis            | ICD-10-CM        |
| C53.1       | Malignant neoplasm of exocervix                                       | Diagnosis            | ICD-10-CM        |
| C53.8       | Malignant neoplasm of overlapping sites of cervix uteri               | Diagnosis            | ICD-10-CM        |
| C53.9       | Malignant neoplasm of cervix uteri, unspecified                       | Diagnosis            | ICD-10-CM        |
| C54.0       | Malignant neoplasm of isthmus uteri                                   | Diagnosis            | ICD-10-CM        |
| C54.1       | Malignant neoplasm of endometrium                                     | Diagnosis            | ICD-10-CM        |
| C54.2       | Malignant neoplasm of myometrium                                      | Diagnosis            | ICD-10-CM        |
| C54.3       | Malignant neoplasm of fundus uteri                                    | Diagnosis            | ICD-10-CM        |
| C54.8       | Malignant neoplasm of overlapping sites of corpus uteri               | Diagnosis            | ICD-10-CM        |
| C54.9       | Malignant neoplasm of corpus uteri, unspecified                       | Diagnosis            | ICD-10-CM        |
| C55         | Malignant neoplasm of uterus, part unspecified                        | Diagnosis            | ICD-10-CM        |
| C56.1       | Malignant neoplasm of right ovary                                     | Diagnosis            | ICD-10-CM        |
| C56.2       | Malignant neoplasm of left ovary                                      | Diagnosis            | ICD-10-CM        |
| C56.9       | Malignant neoplasm of unspecified ovary                               | Diagnosis            | ICD-10-CM        |
| C57.00      | Malignant neoplasm of unspecified fallopian tube                      | Diagnosis            | ICD-10-CM        |
| C57.01      | Malignant neoplasm of right fallopian tube                            | Diagnosis            | ICD-10-CM        |
| C57.02      | Malignant neoplasm of left fallopian tube                             | Diagnosis            | ICD-10-CM        |
| C57.10      | Malignant neoplasm of unspecified broad ligament                      | Diagnosis            | ICD-10-CM        |
| C57.11      | Malignant neoplasm of right broad ligament                            | Diagnosis            | ICD-10-CM        |
| C57.12      | Malignant neoplasm of left broad ligament                             | Diagnosis            | ICD-10-CM        |



| <b>Code</b> | <b>Description</b>                                                                     | <b>Code Category</b> | <b>Code Type</b> |
|-------------|----------------------------------------------------------------------------------------|----------------------|------------------|
| C57.20      | Malignant neoplasm of unspecified round ligament                                       | Diagnosis            | ICD-10-CM        |
| C57.21      | Malignant neoplasm of right round ligament                                             | Diagnosis            | ICD-10-CM        |
| C57.22      | Malignant neoplasm of left round ligament                                              | Diagnosis            | ICD-10-CM        |
| C57.3       | Malignant neoplasm of parametrium                                                      | Diagnosis            | ICD-10-CM        |
| C57.4       | Malignant neoplasm of uterine adnexa, unspecified                                      | Diagnosis            | ICD-10-CM        |
| C57.7       | Malignant neoplasm of other specified female genital organs                            | Diagnosis            | ICD-10-CM        |
| C57.8       | Malignant neoplasm of overlapping sites of female genital organs                       | Diagnosis            | ICD-10-CM        |
| C57.9       | Malignant neoplasm of female genital organ, unspecified                                | Diagnosis            | ICD-10-CM        |
| C58         | Malignant neoplasm of placenta                                                         | Diagnosis            | ICD-10-CM        |
| C60.0       | Malignant neoplasm of prepuce                                                          | Diagnosis            | ICD-10-CM        |
| C60.1       | Malignant neoplasm of glans penis                                                      | Diagnosis            | ICD-10-CM        |
| C60.2       | Malignant neoplasm of body of penis                                                    | Diagnosis            | ICD-10-CM        |
| C60.8       | Malignant neoplasm of overlapping sites of penis                                       | Diagnosis            | ICD-10-CM        |
| C60.9       | Malignant neoplasm of penis, unspecified                                               | Diagnosis            | ICD-10-CM        |
| C61         | Malignant neoplasm of prostate                                                         | Diagnosis            | ICD-10-CM        |
| C62.00      | Malignant neoplasm of unspecified undescended testis                                   | Diagnosis            | ICD-10-CM        |
| C62.01      | Malignant neoplasm of undescended right testis                                         | Diagnosis            | ICD-10-CM        |
| C62.02      | Malignant neoplasm of undescended left testis                                          | Diagnosis            | ICD-10-CM        |
| C62.10      | Malignant neoplasm of unspecified descended testis                                     | Diagnosis            | ICD-10-CM        |
| C62.11      | Malignant neoplasm of descended right testis                                           | Diagnosis            | ICD-10-CM        |
| C62.12      | Malignant neoplasm of descended left testis                                            | Diagnosis            | ICD-10-CM        |
| C62.90      | Malignant neoplasm of unspecified testis, unspecified whether descended or undescended | Diagnosis            | ICD-10-CM        |
| C62.91      | Malignant neoplasm of right testis, unspecified whether descended or undescended       | Diagnosis            | ICD-10-CM        |
| C62.92      | Malignant neoplasm of left testis, unspecified whether descended or undescended        | Diagnosis            | ICD-10-CM        |
| C63.00      | Malignant neoplasm of unspecified epididymis                                           | Diagnosis            | ICD-10-CM        |
| C63.01      | Malignant neoplasm of right epididymis                                                 | Diagnosis            | ICD-10-CM        |
| C63.02      | Malignant neoplasm of left epididymis                                                  | Diagnosis            | ICD-10-CM        |
| C63.10      | Malignant neoplasm of unspecified spermatic cord                                       | Diagnosis            | ICD-10-CM        |
| C63.11      | Malignant neoplasm of right spermatic cord                                             | Diagnosis            | ICD-10-CM        |
| C63.12      | Malignant neoplasm of left spermatic cord                                              | Diagnosis            | ICD-10-CM        |
| C63.2       | Malignant neoplasm of scrotum                                                          | Diagnosis            | ICD-10-CM        |
| C63.7       | Malignant neoplasm of other specified male genital organs                              | Diagnosis            | ICD-10-CM        |
| C63.8       | Malignant neoplasm of overlapping sites of male genital organs                         | Diagnosis            | ICD-10-CM        |
| C63.9       | Malignant neoplasm of male genital organ, unspecified                                  | Diagnosis            | ICD-10-CM        |
| C64.1       | Malignant neoplasm of right kidney, except renal pelvis                                | Diagnosis            | ICD-10-CM        |
| C64.2       | Malignant neoplasm of left kidney, except renal pelvis                                 | Diagnosis            | ICD-10-CM        |
| C64.9       | Malignant neoplasm of unspecified kidney, except renal pelvis                          | Diagnosis            | ICD-10-CM        |
| C65.1       | Malignant neoplasm of right renal pelvis                                               | Diagnosis            | ICD-10-CM        |
| C65.2       | Malignant neoplasm of left renal pelvis                                                | Diagnosis            | ICD-10-CM        |
| C65.9       | Malignant neoplasm of unspecified renal pelvis                                         | Diagnosis            | ICD-10-CM        |
| C66.1       | Malignant neoplasm of right ureter                                                     | Diagnosis            | ICD-10-CM        |
| C66.2       | Malignant neoplasm of left ureter                                                      | Diagnosis            | ICD-10-CM        |
| C66.9       | Malignant neoplasm of unspecified ureter                                               | Diagnosis            | ICD-10-CM        |
| C67.0       | Malignant neoplasm of trigone of bladder                                               | Diagnosis            | ICD-10-CM        |

| <b>Code</b> | <b>Description</b>                                                    | <b>Code Category</b> | <b>Code Type</b> |
|-------------|-----------------------------------------------------------------------|----------------------|------------------|
| C67.1       | Malignant neoplasm of dome of bladder                                 | Diagnosis            | ICD-10-CM        |
| C67.2       | Malignant neoplasm of lateral wall of bladder                         | Diagnosis            | ICD-10-CM        |
| C67.3       | Malignant neoplasm of anterior wall of bladder                        | Diagnosis            | ICD-10-CM        |
| C67.4       | Malignant neoplasm of posterior wall of bladder                       | Diagnosis            | ICD-10-CM        |
| C67.5       | Malignant neoplasm of bladder neck                                    | Diagnosis            | ICD-10-CM        |
| C67.6       | Malignant neoplasm of ureteric orifice                                | Diagnosis            | ICD-10-CM        |
| C67.7       | Malignant neoplasm of urachus                                         | Diagnosis            | ICD-10-CM        |
| C67.8       | Malignant neoplasm of overlapping sites of bladder                    | Diagnosis            | ICD-10-CM        |
| C67.9       | Malignant neoplasm of bladder, unspecified                            | Diagnosis            | ICD-10-CM        |
| C68.0       | Malignant neoplasm of urethra                                         | Diagnosis            | ICD-10-CM        |
| C68.1       | Malignant neoplasm of paraurethral glands                             | Diagnosis            | ICD-10-CM        |
| C68.8       | Malignant neoplasm of overlapping sites of urinary organs             | Diagnosis            | ICD-10-CM        |
| C68.9       | Malignant neoplasm of urinary organ, unspecified                      | Diagnosis            | ICD-10-CM        |
| C69.00      | Malignant neoplasm of unspecified conjunctiva                         | Diagnosis            | ICD-10-CM        |
| C69.01      | Malignant neoplasm of right conjunctiva                               | Diagnosis            | ICD-10-CM        |
| C69.02      | Malignant neoplasm of left conjunctiva                                | Diagnosis            | ICD-10-CM        |
| C69.10      | Malignant neoplasm of unspecified cornea                              | Diagnosis            | ICD-10-CM        |
| C69.11      | Malignant neoplasm of right cornea                                    | Diagnosis            | ICD-10-CM        |
| C69.12      | Malignant neoplasm of left cornea                                     | Diagnosis            | ICD-10-CM        |
| C69.20      | Malignant neoplasm of unspecified retina                              | Diagnosis            | ICD-10-CM        |
| C69.21      | Malignant neoplasm of right retina                                    | Diagnosis            | ICD-10-CM        |
| C69.22      | Malignant neoplasm of left retina                                     | Diagnosis            | ICD-10-CM        |
| C69.30      | Malignant neoplasm of unspecified choroid                             | Diagnosis            | ICD-10-CM        |
| C69.31      | Malignant neoplasm of right choroid                                   | Diagnosis            | ICD-10-CM        |
| C69.32      | Malignant neoplasm of left choroid                                    | Diagnosis            | ICD-10-CM        |
| C69.40      | Malignant neoplasm of unspecified ciliary body                        | Diagnosis            | ICD-10-CM        |
| C69.41      | Malignant neoplasm of right ciliary body                              | Diagnosis            | ICD-10-CM        |
| C69.42      | Malignant neoplasm of left ciliary body                               | Diagnosis            | ICD-10-CM        |
| C69.50      | Malignant neoplasm of unspecified lacrimal gland and duct             | Diagnosis            | ICD-10-CM        |
| C69.51      | Malignant neoplasm of right lacrimal gland and duct                   | Diagnosis            | ICD-10-CM        |
| C69.52      | Malignant neoplasm of left lacrimal gland and duct                    | Diagnosis            | ICD-10-CM        |
| C69.60      | Malignant neoplasm of unspecified orbit                               | Diagnosis            | ICD-10-CM        |
| C69.61      | Malignant neoplasm of right orbit                                     | Diagnosis            | ICD-10-CM        |
| C69.62      | Malignant neoplasm of left orbit                                      | Diagnosis            | ICD-10-CM        |
| C69.80      | Malignant neoplasm of overlapping sites of unspecified eye and adnexa | Diagnosis            | ICD-10-CM        |
| C69.81      | Malignant neoplasm of overlapping sites of right eye and adnexa       | Diagnosis            | ICD-10-CM        |
| C69.82      | Malignant neoplasm of overlapping sites of left eye and adnexa        | Diagnosis            | ICD-10-CM        |
| C69.90      | Malignant neoplasm of unspecified site of unspecified eye             | Diagnosis            | ICD-10-CM        |
| C69.91      | Malignant neoplasm of unspecified site of right eye                   | Diagnosis            | ICD-10-CM        |
| C69.92      | Malignant neoplasm of unspecified site of left eye                    | Diagnosis            | ICD-10-CM        |
| C70.0       | Malignant neoplasm of cerebral meninges                               | Diagnosis            | ICD-10-CM        |
| C70.1       | Malignant neoplasm of spinal meninges                                 | Diagnosis            | ICD-10-CM        |
| C70.9       | Malignant neoplasm of meninges, unspecified                           | Diagnosis            | ICD-10-CM        |
| C71.0       | Malignant neoplasm of cerebrum, except lobes and ventricles           | Diagnosis            | ICD-10-CM        |
| C71.1       | Malignant neoplasm of frontal lobe                                    | Diagnosis            | ICD-10-CM        |

| <b>Code</b> | <b>Description</b>                                                  | <b>Code Category</b> | <b>Code Type</b> |
|-------------|---------------------------------------------------------------------|----------------------|------------------|
| C71.2       | Malignant neoplasm of temporal lobe                                 | Diagnosis            | ICD-10-CM        |
| C71.3       | Malignant neoplasm of parietal lobe                                 | Diagnosis            | ICD-10-CM        |
| C71.4       | Malignant neoplasm of occipital lobe                                | Diagnosis            | ICD-10-CM        |
| C71.5       | Malignant neoplasm of cerebral ventricle                            | Diagnosis            | ICD-10-CM        |
| C71.6       | Malignant neoplasm of cerebellum                                    | Diagnosis            | ICD-10-CM        |
| C71.7       | Malignant neoplasm of brain stem                                    | Diagnosis            | ICD-10-CM        |
| C71.8       | Malignant neoplasm of overlapping sites of brain                    | Diagnosis            | ICD-10-CM        |
| C71.9       | Malignant neoplasm of brain, unspecified                            | Diagnosis            | ICD-10-CM        |
| C72.0       | Malignant neoplasm of spinal cord                                   | Diagnosis            | ICD-10-CM        |
| C72.1       | Malignant neoplasm of cauda equina                                  | Diagnosis            | ICD-10-CM        |
| C72.20      | Malignant neoplasm of unspecified olfactory nerve                   | Diagnosis            | ICD-10-CM        |
| C72.21      | Malignant neoplasm of right olfactory nerve                         | Diagnosis            | ICD-10-CM        |
| C72.22      | Malignant neoplasm of left olfactory nerve                          | Diagnosis            | ICD-10-CM        |
| C72.30      | Malignant neoplasm of unspecified optic nerve                       | Diagnosis            | ICD-10-CM        |
| C72.31      | Malignant neoplasm of right optic nerve                             | Diagnosis            | ICD-10-CM        |
| C72.32      | Malignant neoplasm of left optic nerve                              | Diagnosis            | ICD-10-CM        |
| C72.40      | Malignant neoplasm of unspecified acoustic nerve                    | Diagnosis            | ICD-10-CM        |
| C72.41      | Malignant neoplasm of right acoustic nerve                          | Diagnosis            | ICD-10-CM        |
| C72.42      | Malignant neoplasm of left acoustic nerve                           | Diagnosis            | ICD-10-CM        |
| C72.50      | Malignant neoplasm of unspecified cranial nerve                     | Diagnosis            | ICD-10-CM        |
| C72.59      | Malignant neoplasm of other cranial nerves                          | Diagnosis            | ICD-10-CM        |
| C72.9       | Malignant neoplasm of central nervous system, unspecified           | Diagnosis            | ICD-10-CM        |
| C73         | Malignant neoplasm of thyroid gland                                 | Diagnosis            | ICD-10-CM        |
| C74.00      | Malignant neoplasm of cortex of unspecified adrenal gland           | Diagnosis            | ICD-10-CM        |
| C74.01      | Malignant neoplasm of cortex of right adrenal gland                 | Diagnosis            | ICD-10-CM        |
| C74.02      | Malignant neoplasm of cortex of left adrenal gland                  | Diagnosis            | ICD-10-CM        |
| C74.10      | Malignant neoplasm of medulla of unspecified adrenal gland          | Diagnosis            | ICD-10-CM        |
| C74.11      | Malignant neoplasm of medulla of right adrenal gland                | Diagnosis            | ICD-10-CM        |
| C74.12      | Malignant neoplasm of medulla of left adrenal gland                 | Diagnosis            | ICD-10-CM        |
| C74.90      | Malignant neoplasm of unspecified part of unspecified adrenal gland | Diagnosis            | ICD-10-CM        |
| C74.91      | Malignant neoplasm of unspecified part of right adrenal gland       | Diagnosis            | ICD-10-CM        |
| C74.92      | Malignant neoplasm of unspecified part of left adrenal gland        | Diagnosis            | ICD-10-CM        |
| C75.0       | Malignant neoplasm of parathyroid gland                             | Diagnosis            | ICD-10-CM        |
| C75.1       | Malignant neoplasm of pituitary gland                               | Diagnosis            | ICD-10-CM        |
| C75.2       | Malignant neoplasm of craniopharyngeal duct                         | Diagnosis            | ICD-10-CM        |
| C75.3       | Malignant neoplasm of pineal gland                                  | Diagnosis            | ICD-10-CM        |
| C75.4       | Malignant neoplasm of carotid body                                  | Diagnosis            | ICD-10-CM        |
| C75.5       | Malignant neoplasm of aortic body and other paraganglia             | Diagnosis            | ICD-10-CM        |
| C75.8       | Malignant neoplasm with pluriglandular involvement, unspecified     | Diagnosis            | ICD-10-CM        |
| C75.9       | Malignant neoplasm of endocrine gland, unspecified                  | Diagnosis            | ICD-10-CM        |
| C76.0       | Malignant neoplasm of head, face and neck                           | Diagnosis            | ICD-10-CM        |
| C76.1       | Malignant neoplasm of thorax                                        | Diagnosis            | ICD-10-CM        |
| C76.2       | Malignant neoplasm of abdomen                                       | Diagnosis            | ICD-10-CM        |
| C76.3       | Malignant neoplasm of pelvis                                        | Diagnosis            | ICD-10-CM        |
| C76.40      | Malignant neoplasm of unspecified upper limb                        | Diagnosis            | ICD-10-CM        |

| <b>Code</b> | <b>Description</b>                                                                  | <b>Code Category</b> | <b>Code Type</b> |
|-------------|-------------------------------------------------------------------------------------|----------------------|------------------|
| C76.41      | Malignant neoplasm of right upper limb                                              | Diagnosis            | ICD-10-CM        |
| C76.42      | Malignant neoplasm of left upper limb                                               | Diagnosis            | ICD-10-CM        |
| C76.50      | Malignant neoplasm of unspecified lower limb                                        | Diagnosis            | ICD-10-CM        |
| C76.51      | Malignant neoplasm of right lower limb                                              | Diagnosis            | ICD-10-CM        |
| C76.52      | Malignant neoplasm of left lower limb                                               | Diagnosis            | ICD-10-CM        |
| C76.8       | Malignant neoplasm of other specified ill-defined sites                             | Diagnosis            | ICD-10-CM        |
| C77.0       | Secondary and unspecified malignant neoplasm of lymph nodes of head, face and neck  | Diagnosis            | ICD-10-CM        |
| C77.1       | Secondary and unspecified malignant neoplasm of intrathoracic lymph nodes           | Diagnosis            | ICD-10-CM        |
| C77.2       | Secondary and unspecified malignant neoplasm of intra-abdominal lymph nodes         | Diagnosis            | ICD-10-CM        |
| C77.3       | Secondary and unspecified malignant neoplasm of axilla and upper limb lymph node    | Diagnosis            | ICD-10-CM        |
| C77.4       | Secondary and unspecified malignant neoplasm of inguinal and lower limb lymph nodes | Diagnosis            | ICD-10-CM        |
| C77.5       | Secondary and unspecified malignant neoplasm of intrapelvic lymph nodes             | Diagnosis            | ICD-10-CM        |
| C77.8       | Secondary and unspecified malignant neoplasm of lymph nodes of multiple regions     | Diagnosis            | ICD-10-CM        |
| C77.9       | Secondary and unspecified malignant neoplasm of lymph node, unspecified             | Diagnosis            | ICD-10-CM        |
| C78.00      | Secondary malignant neoplasm of unspecified lung                                    | Diagnosis            | ICD-10-CM        |
| C78.01      | Secondary malignant neoplasm of right lung                                          | Diagnosis            | ICD-10-CM        |
| C78.02      | Secondary malignant neoplasm of left lung                                           | Diagnosis            | ICD-10-CM        |
| C78.1       | Secondary malignant neoplasm of mediastinum                                         | Diagnosis            | ICD-10-CM        |
| C78.2       | Secondary malignant neoplasm of pleura                                              | Diagnosis            | ICD-10-CM        |
| C78.30      | Secondary malignant neoplasm of unspecified respiratory organ                       | Diagnosis            | ICD-10-CM        |
| C78.39      | Secondary malignant neoplasm of other respiratory organs                            | Diagnosis            | ICD-10-CM        |
| C78.4       | Secondary malignant neoplasm of small intestine                                     | Diagnosis            | ICD-10-CM        |
| C78.5       | Secondary malignant neoplasm of large intestine and rectum                          | Diagnosis            | ICD-10-CM        |
| C78.6       | Secondary malignant neoplasm of retroperitoneum and peritoneum                      | Diagnosis            | ICD-10-CM        |
| C78.7       | Secondary malignant neoplasm of liver and intrahepatic bile duct                    | Diagnosis            | ICD-10-CM        |
| C78.80      | Secondary malignant neoplasm of unspecified digestive organ                         | Diagnosis            | ICD-10-CM        |
| C78.89      | Secondary malignant neoplasm of other digestive organs                              | Diagnosis            | ICD-10-CM        |
| C79.00      | Secondary malignant neoplasm of unspecified kidney and renal pelvis                 | Diagnosis            | ICD-10-CM        |
| C79.01      | Secondary malignant neoplasm of right kidney and renal pelvis                       | Diagnosis            | ICD-10-CM        |
| C79.02      | Secondary malignant neoplasm of left kidney and renal pelvis                        | Diagnosis            | ICD-10-CM        |
| C79.10      | Secondary malignant neoplasm of unspecified urinary organs                          | Diagnosis            | ICD-10-CM        |
| C79.11      | Secondary malignant neoplasm of bladder                                             | Diagnosis            | ICD-10-CM        |
| C79.19      | Secondary malignant neoplasm of other urinary organs                                | Diagnosis            | ICD-10-CM        |
| C79.2       | Secondary malignant neoplasm of skin                                                | Diagnosis            | ICD-10-CM        |
| C79.31      | Secondary malignant neoplasm of brain                                               | Diagnosis            | ICD-10-CM        |
| C79.32      | Secondary malignant neoplasm of cerebral meninges                                   | Diagnosis            | ICD-10-CM        |
| C79.40      | Secondary malignant neoplasm of unspecified part of nervous system                  | Diagnosis            | ICD-10-CM        |
| C79.49      | Secondary malignant neoplasm of other parts of nervous system                       | Diagnosis            | ICD-10-CM        |
| C79.51      | Secondary malignant neoplasm of bone                                                | Diagnosis            | ICD-10-CM        |
| C79.52      | Secondary malignant neoplasm of bone marrow                                         | Diagnosis            | ICD-10-CM        |
| C79.60      | Secondary malignant neoplasm of unspecified ovary                                   | Diagnosis            | ICD-10-CM        |
| C79.61      | Secondary malignant neoplasm of right ovary                                         | Diagnosis            | ICD-10-CM        |
| C79.62      | Secondary malignant neoplasm of left ovary                                          | Diagnosis            | ICD-10-CM        |

| <b>Code</b> | <b>Description</b>                                                                             | <b>Code Category</b> | <b>Code Type</b> |
|-------------|------------------------------------------------------------------------------------------------|----------------------|------------------|
| C79.70      | Secondary malignant neoplasm of unspecified adrenal gland                                      | Diagnosis            | ICD-10-CM        |
| C79.71      | Secondary malignant neoplasm of right adrenal gland                                            | Diagnosis            | ICD-10-CM        |
| C79.72      | Secondary malignant neoplasm of left adrenal gland                                             | Diagnosis            | ICD-10-CM        |
| C79.81      | Secondary malignant neoplasm of breast                                                         | Diagnosis            | ICD-10-CM        |
| C79.82      | Secondary malignant neoplasm of genital organs                                                 | Diagnosis            | ICD-10-CM        |
| C79.89      | Secondary malignant neoplasm of other specified sites                                          | Diagnosis            | ICD-10-CM        |
| C79.9       | Secondary malignant neoplasm of unspecified site                                               | Diagnosis            | ICD-10-CM        |
| C80.0       | Disseminated malignant neoplasm, unspecified                                                   | Diagnosis            | ICD-10-CM        |
| C80.1       | Malignant (primary) neoplasm, unspecified                                                      | Diagnosis            | ICD-10-CM        |
| C80.2       | Malignant neoplasm associated with transplanted organ                                          | Diagnosis            | ICD-10-CM        |
| C81.00      | Nodular lymphocyte predominant Hodgkin lymphoma, unspecified site                              | Diagnosis            | ICD-10-CM        |
| C81.01      | Nodular lymphocyte predominant Hodgkin lymphoma, lymph nodes of head, face, and neck           | Diagnosis            | ICD-10-CM        |
| C81.02      | Nodular lymphocyte predominant Hodgkin lymphoma, intrathoracic lymph nodes                     | Diagnosis            | ICD-10-CM        |
| C81.03      | Nodular lymphocyte predominant Hodgkin lymphoma, intra-abdominal lymph nodes                   | Diagnosis            | ICD-10-CM        |
| C81.04      | Nodular lymphocyte predominant Hodgkin lymphoma, lymph nodes of axilla and upper limb          | Diagnosis            | ICD-10-CM        |
| C81.05      | Nodular lymphocyte predominant Hodgkin lymphoma, lymph nodes of inguinal region and lower limb | Diagnosis            | ICD-10-CM        |
| C81.06      | Nodular lymphocyte predominant Hodgkin lymphoma, intrapelvic lymph nodes                       | Diagnosis            | ICD-10-CM        |
| C81.07      | Nodular lymphocyte predominant Hodgkin lymphoma, spleen                                        | Diagnosis            | ICD-10-CM        |
| C81.08      | Nodular lymphocyte predominant Hodgkin lymphoma, lymph nodes of multiple sites                 | Diagnosis            | ICD-10-CM        |
| C81.09      | Nodular lymphocyte predominant Hodgkin lymphoma, extranodal and solid organ sites              | Diagnosis            | ICD-10-CM        |
| C81.10      | Nodular sclerosis Hodgkin lymphoma, unspecified site                                           | Diagnosis            | ICD-10-CM        |
| C81.11      | Nodular sclerosis Hodgkin lymphoma, lymph nodes of head, face, and neck                        | Diagnosis            | ICD-10-CM        |
| C81.12      | Nodular sclerosis Hodgkin lymphoma, intrathoracic lymph nodes                                  | Diagnosis            | ICD-10-CM        |
| C81.13      | Nodular sclerosis Hodgkin lymphoma, intra-abdominal lymph nodes                                | Diagnosis            | ICD-10-CM        |
| C81.14      | Nodular sclerosis Hodgkin lymphoma, lymph nodes of axilla and upper limb                       | Diagnosis            | ICD-10-CM        |
| C81.15      | Nodular sclerosis Hodgkin lymphoma, lymph nodes of inguinal region and lower limb              | Diagnosis            | ICD-10-CM        |
| C81.16      | Nodular sclerosis Hodgkin lymphoma, intrapelvic lymph nodes                                    | Diagnosis            | ICD-10-CM        |
| C81.17      | Nodular sclerosis Hodgkin lymphoma, spleen                                                     | Diagnosis            | ICD-10-CM        |
| C81.18      | Nodular sclerosis Hodgkin lymphoma, lymph nodes of multiple sites                              | Diagnosis            | ICD-10-CM        |
| C81.19      | Nodular sclerosis Hodgkin lymphoma, extranodal and solid organ sites                           | Diagnosis            | ICD-10-CM        |
| C81.20      | Mixed cellularity Hodgkin lymphoma, unspecified site                                           | Diagnosis            | ICD-10-CM        |
| C81.21      | Mixed cellularity Hodgkin lymphoma, lymph nodes of head, face, and neck                        | Diagnosis            | ICD-10-CM        |
| C81.22      | Mixed cellularity Hodgkin lymphoma, intrathoracic lymph nodes                                  | Diagnosis            | ICD-10-CM        |
| C81.23      | Mixed cellularity Hodgkin lymphoma, intra-abdominal lymph nodes                                | Diagnosis            | ICD-10-CM        |
| C81.24      | Mixed cellularity Hodgkin lymphoma, lymph nodes of axilla and upper limb                       | Diagnosis            | ICD-10-CM        |
| C81.25      | Mixed cellularity Hodgkin lymphoma, lymph nodes of inguinal region and lower limb              | Diagnosis            | ICD-10-CM        |
| C81.26      | Mixed cellularity Hodgkin lymphoma, intrapelvic lymph nodes                                    | Diagnosis            | ICD-10-CM        |
| C81.27      | Mixed cellularity Hodgkin lymphoma, spleen                                                     | Diagnosis            | ICD-10-CM        |
| C81.28      | Mixed cellularity Hodgkin lymphoma, lymph nodes of multiple sites                              | Diagnosis            | ICD-10-CM        |

| <b>Code</b> | <b>Description</b>                                                                  | <b>Code Category</b> | <b>Code Type</b> |
|-------------|-------------------------------------------------------------------------------------|----------------------|------------------|
| C81.29      | Mixed cellularity Hodgkin lymphoma, extranodal and solid organ sites                | Diagnosis            | ICD-10-CM        |
| C81.30      | Lymphocyte depleted Hodgkin lymphoma, unspecified site                              | Diagnosis            | ICD-10-CM        |
| C81.31      | Lymphocyte depleted Hodgkin lymphoma, lymph nodes of head, face, and neck           | Diagnosis            | ICD-10-CM        |
| C81.32      | Lymphocyte depleted Hodgkin lymphoma, intrathoracic lymph nodes                     | Diagnosis            | ICD-10-CM        |
| C81.33      | Lymphocyte depleted Hodgkin lymphoma, intra-abdominal lymph nodes                   | Diagnosis            | ICD-10-CM        |
| C81.34      | Lymphocyte depleted Hodgkin lymphoma, lymph nodes of axilla and upper limb          | Diagnosis            | ICD-10-CM        |
| C81.35      | Lymphocyte depleted Hodgkin lymphoma, lymph nodes of inguinal region and lower limb | Diagnosis            | ICD-10-CM        |
| C81.36      | Lymphocyte depleted Hodgkin lymphoma, intrapelvic lymph nodes                       | Diagnosis            | ICD-10-CM        |
| C81.37      | Lymphocyte depleted Hodgkin lymphoma, spleen                                        | Diagnosis            | ICD-10-CM        |
| C81.38      | Lymphocyte depleted Hodgkin lymphoma, lymph nodes of multiple sites                 | Diagnosis            | ICD-10-CM        |
| C81.39      | Lymphocyte depleted Hodgkin lymphoma, extranodal and solid organ sites              | Diagnosis            | ICD-10-CM        |
| C81.40      | Lymphocyte-rich Hodgkin lymphoma, unspecified site                                  | Diagnosis            | ICD-10-CM        |
| C81.41      | Lymphocyte-rich Hodgkin lymphoma, lymph nodes of head, face, and neck               | Diagnosis            | ICD-10-CM        |
| C81.42      | Lymphocyte-rich Hodgkin lymphoma, intrathoracic lymph nodes                         | Diagnosis            | ICD-10-CM        |
| C81.43      | Lymphocyte-rich Hodgkin lymphoma, intra-abdominal lymph nodes                       | Diagnosis            | ICD-10-CM        |
| C81.44      | Lymphocyte-rich Hodgkin lymphoma, lymph nodes of axilla and upper limb              | Diagnosis            | ICD-10-CM        |
| C81.45      | Lymphocyte-rich Hodgkin lymphoma, lymph nodes of inguinal region and lower limb     | Diagnosis            | ICD-10-CM        |
| C81.46      | Lymphocyte-rich Hodgkin lymphoma, intrapelvic lymph nodes                           | Diagnosis            | ICD-10-CM        |
| C81.47      | Lymphocyte-rich Hodgkin lymphoma, spleen                                            | Diagnosis            | ICD-10-CM        |
| C81.48      | Lymphocyte-rich Hodgkin lymphoma, lymph nodes of multiple sites                     | Diagnosis            | ICD-10-CM        |
| C81.49      | Lymphocyte-rich Hodgkin lymphoma, extranodal and solid organ sites                  | Diagnosis            | ICD-10-CM        |
| C81.70      | Other Hodgkin lymphoma, unspecified site                                            | Diagnosis            | ICD-10-CM        |
| C81.71      | Other Hodgkin lymphoma, lymph nodes of head, face, and neck                         | Diagnosis            | ICD-10-CM        |
| C81.72      | Other Hodgkin lymphoma, intrathoracic lymph nodes                                   | Diagnosis            | ICD-10-CM        |
| C81.73      | Other Hodgkin lymphoma, intra-abdominal lymph nodes                                 | Diagnosis            | ICD-10-CM        |
| C81.74      | Other Hodgkin lymphoma, lymph nodes of axilla and upper limb                        | Diagnosis            | ICD-10-CM        |
| C81.75      | Other Hodgkin lymphoma, lymph nodes of inguinal region and lower limb               | Diagnosis            | ICD-10-CM        |
| C81.76      | Other Hodgkin lymphoma, intrapelvic lymph nodes                                     | Diagnosis            | ICD-10-CM        |
| C81.77      | Other Hodgkin lymphoma, spleen                                                      | Diagnosis            | ICD-10-CM        |
| C81.78      | Other Hodgkin lymphoma, lymph nodes of multiple sites                               | Diagnosis            | ICD-10-CM        |
| C81.79      | Other Hodgkin lymphoma, extranodal and solid organ sites                            | Diagnosis            | ICD-10-CM        |
| C81.90      | Hodgkin lymphoma, unspecified, unspecified site                                     | Diagnosis            | ICD-10-CM        |
| C81.91      | Hodgkin lymphoma, unspecified, lymph nodes of head, face, and neck                  | Diagnosis            | ICD-10-CM        |
| C81.92      | Hodgkin lymphoma, unspecified, intrathoracic lymph nodes                            | Diagnosis            | ICD-10-CM        |
| C81.93      | Hodgkin lymphoma, unspecified, intra-abdominal lymph nodes                          | Diagnosis            | ICD-10-CM        |
| C81.94      | Hodgkin lymphoma, unspecified, lymph nodes of axilla and upper limb                 | Diagnosis            | ICD-10-CM        |
| C81.95      | Hodgkin lymphoma, unspecified, lymph nodes of inguinal region and lower limb        | Diagnosis            | ICD-10-CM        |
| C81.96      | Hodgkin lymphoma, unspecified, intrapelvic lymph nodes                              | Diagnosis            | ICD-10-CM        |
| C81.97      | Hodgkin lymphoma, unspecified, spleen                                               | Diagnosis            | ICD-10-CM        |
| C81.98      | Hodgkin lymphoma, unspecified, lymph nodes of multiple sites                        | Diagnosis            | ICD-10-CM        |
| C81.99      | Hodgkin lymphoma, unspecified, extranodal and solid organ sites                     | Diagnosis            | ICD-10-CM        |
| C82.00      | Follicular lymphoma grade I, unspecified site                                       | Diagnosis            | ICD-10-CM        |
| C82.01      | Follicular lymphoma grade I, lymph nodes of head, face, and neck                    | Diagnosis            | ICD-10-CM        |
| C82.02      | Follicular lymphoma grade I, intrathoracic lymph nodes                              | Diagnosis            | ICD-10-CM        |

| <b>Code</b> | <b>Description</b>                                                                        | <b>Code Category</b> | <b>Code Type</b> |
|-------------|-------------------------------------------------------------------------------------------|----------------------|------------------|
| C82.03      | Follicular lymphoma grade I, intra-abdominal lymph nodes                                  | Diagnosis            | ICD-10-CM        |
| C82.04      | Follicular lymphoma grade I, lymph nodes of axilla and upper limb                         | Diagnosis            | ICD-10-CM        |
| C82.05      | Follicular lymphoma grade I, lymph nodes of inguinal region and lower limb                | Diagnosis            | ICD-10-CM        |
| C82.06      | Follicular lymphoma grade I, intrapelvic lymph nodes                                      | Diagnosis            | ICD-10-CM        |
| C82.07      | Follicular lymphoma grade I, spleen                                                       | Diagnosis            | ICD-10-CM        |
| C82.08      | Follicular lymphoma grade I, lymph nodes of multiple sites                                | Diagnosis            | ICD-10-CM        |
| C82.09      | Follicular lymphoma grade I, extranodal and solid organ sites                             | Diagnosis            | ICD-10-CM        |
| C82.10      | Follicular lymphoma grade II, unspecified site                                            | Diagnosis            | ICD-10-CM        |
| C82.11      | Follicular lymphoma grade II, lymph nodes of head, face, and neck                         | Diagnosis            | ICD-10-CM        |
| C82.12      | Follicular lymphoma grade II, intrathoracic lymph nodes                                   | Diagnosis            | ICD-10-CM        |
| C82.13      | Follicular lymphoma grade II, intra-abdominal lymph nodes                                 | Diagnosis            | ICD-10-CM        |
| C82.14      | Follicular lymphoma grade II, lymph nodes of axilla and upper limb                        | Diagnosis            | ICD-10-CM        |
| C82.15      | Follicular lymphoma grade II, lymph nodes of inguinal region and lower limb               | Diagnosis            | ICD-10-CM        |
| C82.16      | Follicular lymphoma grade II, intrapelvic lymph nodes                                     | Diagnosis            | ICD-10-CM        |
| C82.17      | Follicular lymphoma grade II, spleen                                                      | Diagnosis            | ICD-10-CM        |
| C82.18      | Follicular lymphoma grade II, lymph nodes of multiple sites                               | Diagnosis            | ICD-10-CM        |
| C82.19      | Follicular lymphoma grade II, extranodal and solid organ sites                            | Diagnosis            | ICD-10-CM        |
| C82.20      | Follicular lymphoma grade III, unspecified, unspecified site                              | Diagnosis            | ICD-10-CM        |
| C82.21      | Follicular lymphoma grade III, unspecified, lymph nodes of head, face, and neck           | Diagnosis            | ICD-10-CM        |
| C82.22      | Follicular lymphoma grade III, unspecified, intrathoracic lymph nodes                     | Diagnosis            | ICD-10-CM        |
| C82.23      | Follicular lymphoma grade III, unspecified, intra-abdominal lymph nodes                   | Diagnosis            | ICD-10-CM        |
| C82.24      | Follicular lymphoma grade III, unspecified, lymph nodes of axilla and upper limb          | Diagnosis            | ICD-10-CM        |
| C82.25      | Follicular lymphoma grade III, unspecified, lymph nodes of inguinal region and lower limb | Diagnosis            | ICD-10-CM        |
| C82.26      | Follicular lymphoma grade III, unspecified, intrapelvic lymph nodes                       | Diagnosis            | ICD-10-CM        |
| C82.27      | Follicular lymphoma grade III, unspecified, spleen                                        | Diagnosis            | ICD-10-CM        |
| C82.28      | Follicular lymphoma grade III, unspecified, lymph nodes of multiple sites                 | Diagnosis            | ICD-10-CM        |
| C82.29      | Follicular lymphoma grade III, unspecified, extranodal and solid organ sites              | Diagnosis            | ICD-10-CM        |
| C82.30      | Follicular lymphoma grade IIIa, unspecified site                                          | Diagnosis            | ICD-10-CM        |
| C82.31      | Follicular lymphoma grade IIIa, lymph nodes of head, face, and neck                       | Diagnosis            | ICD-10-CM        |
| C82.32      | Follicular lymphoma grade IIIa, intrathoracic lymph nodes                                 | Diagnosis            | ICD-10-CM        |
| C82.33      | Follicular lymphoma grade IIIa, intra-abdominal lymph nodes                               | Diagnosis            | ICD-10-CM        |
| C82.34      | Follicular lymphoma grade IIIa, lymph nodes of axilla and upper limb                      | Diagnosis            | ICD-10-CM        |
| C82.35      | Follicular lymphoma grade IIIa, lymph nodes of inguinal region and lower limb             | Diagnosis            | ICD-10-CM        |
| C82.36      | Follicular lymphoma grade IIIa, intrapelvic lymph nodes                                   | Diagnosis            | ICD-10-CM        |
| C82.37      | Follicular lymphoma grade IIIa, spleen                                                    | Diagnosis            | ICD-10-CM        |
| C82.38      | Follicular lymphoma grade IIIa, lymph nodes of multiple sites                             | Diagnosis            | ICD-10-CM        |
| C82.39      | Follicular lymphoma grade IIIa, extranodal and solid organ sites                          | Diagnosis            | ICD-10-CM        |
| C82.40      | Follicular lymphoma grade IIIb, unspecified site                                          | Diagnosis            | ICD-10-CM        |
| C82.41      | Follicular lymphoma grade IIIb, lymph nodes of head, face, and neck                       | Diagnosis            | ICD-10-CM        |
| C82.42      | Follicular lymphoma grade IIIb, intrathoracic lymph nodes                                 | Diagnosis            | ICD-10-CM        |
| C82.43      | Follicular lymphoma grade IIIb, intra-abdominal lymph nodes                               | Diagnosis            | ICD-10-CM        |
| C82.44      | Follicular lymphoma grade IIIb, lymph nodes of axilla and upper limb                      | Diagnosis            | ICD-10-CM        |
| C82.45      | Follicular lymphoma grade IIIb, lymph nodes of inguinal region and lower limb             | Diagnosis            | ICD-10-CM        |
| C82.46      | Follicular lymphoma grade IIIb, intrapelvic lymph nodes                                   | Diagnosis            | ICD-10-CM        |

| <b>Code</b> | <b>Description</b>                                                                | <b>Code Category</b> | <b>Code Type</b> |
|-------------|-----------------------------------------------------------------------------------|----------------------|------------------|
| C82.47      | Follicular lymphoma grade IIIb, spleen                                            | Diagnosis            | ICD-10-CM        |
| C82.48      | Follicular lymphoma grade IIIb, lymph nodes of multiple sites                     | Diagnosis            | ICD-10-CM        |
| C82.49      | Follicular lymphoma grade IIIb, extranodal and solid organ sites                  | Diagnosis            | ICD-10-CM        |
| C82.50      | Diffuse follicle center lymphoma, unspecified site                                | Diagnosis            | ICD-10-CM        |
| C82.51      | Diffuse follicle center lymphoma, lymph nodes of head, face, and neck             | Diagnosis            | ICD-10-CM        |
| C82.52      | Diffuse follicle center lymphoma, intrathoracic lymph nodes                       | Diagnosis            | ICD-10-CM        |
| C82.53      | Diffuse follicle center lymphoma, intra-abdominal lymph nodes                     | Diagnosis            | ICD-10-CM        |
| C82.54      | Diffuse follicle center lymphoma, lymph nodes of axilla and upper limb            | Diagnosis            | ICD-10-CM        |
| C82.55      | Diffuse follicle center lymphoma, lymph nodes of inguinal region and lower limb   | Diagnosis            | ICD-10-CM        |
| C82.56      | Diffuse follicle center lymphoma, intrapelvic lymph nodes                         | Diagnosis            | ICD-10-CM        |
| C82.57      | Diffuse follicle center lymphoma, spleen                                          | Diagnosis            | ICD-10-CM        |
| C82.58      | Diffuse follicle center lymphoma, lymph nodes of multiple sites                   | Diagnosis            | ICD-10-CM        |
| C82.59      | Diffuse follicle center lymphoma, extranodal and solid organ sites                | Diagnosis            | ICD-10-CM        |
| C82.60      | Cutaneous follicle center lymphoma, unspecified site                              | Diagnosis            | ICD-10-CM        |
| C82.61      | Cutaneous follicle center lymphoma, lymph nodes of head, face, and neck           | Diagnosis            | ICD-10-CM        |
| C82.62      | Cutaneous follicle center lymphoma, intrathoracic lymph nodes                     | Diagnosis            | ICD-10-CM        |
| C82.63      | Cutaneous follicle center lymphoma, intra-abdominal lymph nodes                   | Diagnosis            | ICD-10-CM        |
| C82.64      | Cutaneous follicle center lymphoma, lymph nodes of axilla and upper limb          | Diagnosis            | ICD-10-CM        |
| C82.65      | Cutaneous follicle center lymphoma, lymph nodes of inguinal region and lower limb | Diagnosis            | ICD-10-CM        |
| C82.66      | Cutaneous follicle center lymphoma, intrapelvic lymph nodes                       | Diagnosis            | ICD-10-CM        |
| C82.67      | Cutaneous follicle center lymphoma, spleen                                        | Diagnosis            | ICD-10-CM        |
| C82.68      | Cutaneous follicle center lymphoma, lymph nodes of multiple sites                 | Diagnosis            | ICD-10-CM        |
| C82.69      | Cutaneous follicle center lymphoma, extranodal and solid organ sites              | Diagnosis            | ICD-10-CM        |
| C82.80      | Other types of follicular lymphoma, unspecified site                              | Diagnosis            | ICD-10-CM        |
| C82.81      | Other types of follicular lymphoma, lymph nodes of head, face, and neck           | Diagnosis            | ICD-10-CM        |
| C82.82      | Other types of follicular lymphoma, intrathoracic lymph nodes                     | Diagnosis            | ICD-10-CM        |
| C82.83      | Other types of follicular lymphoma, intra-abdominal lymph nodes                   | Diagnosis            | ICD-10-CM        |
| C82.84      | Other types of follicular lymphoma, lymph nodes of axilla and upper limb          | Diagnosis            | ICD-10-CM        |
| C82.85      | Other types of follicular lymphoma, lymph nodes of inguinal region and lower limb | Diagnosis            | ICD-10-CM        |
| C82.86      | Other types of follicular lymphoma, intrapelvic lymph nodes                       | Diagnosis            | ICD-10-CM        |
| C82.87      | Other types of follicular lymphoma, spleen                                        | Diagnosis            | ICD-10-CM        |
| C82.88      | Other types of follicular lymphoma, lymph nodes of multiple sites                 | Diagnosis            | ICD-10-CM        |
| C82.89      | Other types of follicular lymphoma, extranodal and solid organ sites              | Diagnosis            | ICD-10-CM        |
| C82.90      | Follicular lymphoma, unspecified, unspecified site                                | Diagnosis            | ICD-10-CM        |
| C82.91      | Follicular lymphoma, unspecified, lymph nodes of head, face, and neck             | Diagnosis            | ICD-10-CM        |
| C82.92      | Follicular lymphoma, unspecified, intrathoracic lymph nodes                       | Diagnosis            | ICD-10-CM        |
| C82.93      | Follicular lymphoma, unspecified, intra-abdominal lymph nodes                     | Diagnosis            | ICD-10-CM        |
| C82.94      | Follicular lymphoma, unspecified, lymph nodes of axilla and upper limb            | Diagnosis            | ICD-10-CM        |
| C82.95      | Follicular lymphoma, unspecified, lymph nodes of inguinal region and lower limb   | Diagnosis            | ICD-10-CM        |
| C82.96      | Follicular lymphoma, unspecified, intrapelvic lymph nodes                         | Diagnosis            | ICD-10-CM        |
| C82.97      | Follicular lymphoma, unspecified, spleen                                          | Diagnosis            | ICD-10-CM        |
| C82.98      | Follicular lymphoma, unspecified, lymph nodes of multiple sites                   | Diagnosis            | ICD-10-CM        |
| C82.99      | Follicular lymphoma, unspecified, extranodal and solid organ sites                | Diagnosis            | ICD-10-CM        |
| C83.00      | Small cell B-cell lymphoma, unspecified site                                      | Diagnosis            | ICD-10-CM        |
| C83.01      | Small cell B-cell lymphoma, lymph nodes of head, face, and neck                   | Diagnosis            | ICD-10-CM        |



| <b>Code</b> | <b>Description</b>                                                              | <b>Code Category</b> | <b>Code Type</b> |
|-------------|---------------------------------------------------------------------------------|----------------------|------------------|
| C83.02      | Small cell B-cell lymphoma, intrathoracic lymph nodes                           | Diagnosis            | ICD-10-CM        |
| C83.03      | Small cell B-cell lymphoma, intra-abdominal lymph nodes                         | Diagnosis            | ICD-10-CM        |
| C83.04      | Small cell B-cell lymphoma, lymph nodes of axilla and upper limb                | Diagnosis            | ICD-10-CM        |
| C83.05      | Small cell B-cell lymphoma, lymph nodes of inguinal region and lower limb       | Diagnosis            | ICD-10-CM        |
| C83.06      | Small cell B-cell lymphoma, intrapelvic lymph nodes                             | Diagnosis            | ICD-10-CM        |
| C83.07      | Small cell B-cell lymphoma, spleen                                              | Diagnosis            | ICD-10-CM        |
| C83.08      | Small cell B-cell lymphoma, lymph nodes of multiple sites                       | Diagnosis            | ICD-10-CM        |
| C83.09      | Small cell B-cell lymphoma, extranodal and solid organ sites                    | Diagnosis            | ICD-10-CM        |
| C83.10      | Mantle cell lymphoma, unspecified site                                          | Diagnosis            | ICD-10-CM        |
| C83.11      | Mantle cell lymphoma, lymph nodes of head, face, and neck                       | Diagnosis            | ICD-10-CM        |
| C83.12      | Mantle cell lymphoma, intrathoracic lymph nodes                                 | Diagnosis            | ICD-10-CM        |
| C83.13      | Mantle cell lymphoma, intra-abdominal lymph nodes                               | Diagnosis            | ICD-10-CM        |
| C83.14      | Mantle cell lymphoma, lymph nodes of axilla and upper limb                      | Diagnosis            | ICD-10-CM        |
| C83.15      | Mantle cell lymphoma, lymph nodes of inguinal region and lower limb             | Diagnosis            | ICD-10-CM        |
| C83.16      | Mantle cell lymphoma, intrapelvic lymph nodes                                   | Diagnosis            | ICD-10-CM        |
| C83.17      | Mantle cell lymphoma, spleen                                                    | Diagnosis            | ICD-10-CM        |
| C83.18      | Mantle cell lymphoma, lymph nodes of multiple sites                             | Diagnosis            | ICD-10-CM        |
| C83.19      | Mantle cell lymphoma, extranodal and solid organ sites                          | Diagnosis            | ICD-10-CM        |
| C83.30      | Diffuse large B-cell lymphoma, unspecified site                                 | Diagnosis            | ICD-10-CM        |
| C83.31      | Diffuse large B-cell lymphoma, lymph nodes of head, face, and neck              | Diagnosis            | ICD-10-CM        |
| C83.32      | Diffuse large B-cell lymphoma, intrathoracic lymph nodes                        | Diagnosis            | ICD-10-CM        |
| C83.33      | Diffuse large B-cell lymphoma, intra-abdominal lymph nodes                      | Diagnosis            | ICD-10-CM        |
| C83.34      | Diffuse large B-cell lymphoma, lymph nodes of axilla and upper limb             | Diagnosis            | ICD-10-CM        |
| C83.35      | Diffuse large B-cell lymphoma, lymph nodes of inguinal region and lower limb    | Diagnosis            | ICD-10-CM        |
| C83.36      | Diffuse large B-cell lymphoma, intrapelvic lymph nodes                          | Diagnosis            | ICD-10-CM        |
| C83.37      | Diffuse large B-cell lymphoma, spleen                                           | Diagnosis            | ICD-10-CM        |
| C83.38      | Diffuse large B-cell lymphoma, lymph nodes of multiple sites                    | Diagnosis            | ICD-10-CM        |
| C83.39      | Diffuse large B-cell lymphoma, extranodal and solid organ sites                 | Diagnosis            | ICD-10-CM        |
| C83.50      | Lymphoblastic (diffuse) lymphoma, unspecified site                              | Diagnosis            | ICD-10-CM        |
| C83.51      | Lymphoblastic (diffuse) lymphoma, lymph nodes of head, face, and neck           | Diagnosis            | ICD-10-CM        |
| C83.52      | Lymphoblastic (diffuse) lymphoma, intrathoracic lymph nodes                     | Diagnosis            | ICD-10-CM        |
| C83.53      | Lymphoblastic (diffuse) lymphoma, intra-abdominal lymph nodes                   | Diagnosis            | ICD-10-CM        |
| C83.54      | Lymphoblastic (diffuse) lymphoma, lymph nodes of axilla and upper limb          | Diagnosis            | ICD-10-CM        |
| C83.55      | Lymphoblastic (diffuse) lymphoma, lymph nodes of inguinal region and lower limb | Diagnosis            | ICD-10-CM        |
| C83.56      | Lymphoblastic (diffuse) lymphoma, intrapelvic lymph nodes                       | Diagnosis            | ICD-10-CM        |
| C83.57      | Lymphoblastic (diffuse) lymphoma, spleen                                        | Diagnosis            | ICD-10-CM        |
| C83.58      | Lymphoblastic (diffuse) lymphoma, lymph nodes of multiple sites                 | Diagnosis            | ICD-10-CM        |
| C83.59      | Lymphoblastic (diffuse) lymphoma, extranodal and solid organ sites              | Diagnosis            | ICD-10-CM        |
| C83.70      | Burkitt lymphoma, unspecified site                                              | Diagnosis            | ICD-10-CM        |
| C83.71      | Burkitt lymphoma, lymph nodes of head, face, and neck                           | Diagnosis            | ICD-10-CM        |
| C83.72      | Burkitt lymphoma, intrathoracic lymph nodes                                     | Diagnosis            | ICD-10-CM        |
| C83.73      | Burkitt lymphoma, intra-abdominal lymph nodes                                   | Diagnosis            | ICD-10-CM        |
| C83.74      | Burkitt lymphoma, lymph nodes of axilla and upper limb                          | Diagnosis            | ICD-10-CM        |
| C83.75      | Burkitt lymphoma, lymph nodes of inguinal region and lower limb                 | Diagnosis            | ICD-10-CM        |
| C83.76      | Burkitt lymphoma, intrapelvic lymph nodes                                       | Diagnosis            | ICD-10-CM        |

| <b>Code</b> | <b>Description</b>                                                                            | <b>Code Category</b> | <b>Code Type</b> |
|-------------|-----------------------------------------------------------------------------------------------|----------------------|------------------|
| C83.77      | Burkitt lymphoma, spleen                                                                      | Diagnosis            | ICD-10-CM        |
| C83.78      | Burkitt lymphoma, lymph nodes of multiple sites                                               | Diagnosis            | ICD-10-CM        |
| C83.79      | Burkitt lymphoma, extranodal and solid organ sites                                            | Diagnosis            | ICD-10-CM        |
| C83.80      | Other non-follicular lymphoma, unspecified site                                               | Diagnosis            | ICD-10-CM        |
| C83.81      | Other non-follicular lymphoma, lymph nodes of head, face, and neck                            | Diagnosis            | ICD-10-CM        |
| C83.82      | Other non-follicular lymphoma, intrathoracic lymph nodes                                      | Diagnosis            | ICD-10-CM        |
| C83.83      | Other non-follicular lymphoma, intra-abdominal lymph nodes                                    | Diagnosis            | ICD-10-CM        |
| C83.84      | Other non-follicular lymphoma, lymph nodes of axilla and upper limb                           | Diagnosis            | ICD-10-CM        |
| C83.85      | Other non-follicular lymphoma, lymph nodes of inguinal region and lower limb                  | Diagnosis            | ICD-10-CM        |
| C83.86      | Other non-follicular lymphoma, intrapelvic lymph nodes                                        | Diagnosis            | ICD-10-CM        |
| C83.87      | Other non-follicular lymphoma, spleen                                                         | Diagnosis            | ICD-10-CM        |
| C83.88      | Other non-follicular lymphoma, lymph nodes of multiple sites                                  | Diagnosis            | ICD-10-CM        |
| C83.89      | Other non-follicular lymphoma, extranodal and solid organ sites                               | Diagnosis            | ICD-10-CM        |
| C83.90      | Non-follicular (diffuse) lymphoma, unspecified, unspecified site                              | Diagnosis            | ICD-10-CM        |
| C83.91      | Non-follicular (diffuse) lymphoma, unspecified, lymph nodes of head, face, and neck           | Diagnosis            | ICD-10-CM        |
| C83.92      | Non-follicular (diffuse) lymphoma, unspecified, intrathoracic lymph nodes                     | Diagnosis            | ICD-10-CM        |
| C83.93      | Non-follicular (diffuse) lymphoma, unspecified, intra-abdominal lymph nodes                   | Diagnosis            | ICD-10-CM        |
| C83.94      | Non-follicular (diffuse) lymphoma, unspecified, lymph nodes of axilla and upper limb          | Diagnosis            | ICD-10-CM        |
| C83.95      | Non-follicular (diffuse) lymphoma, unspecified, lymph nodes of inguinal region and lower limb | Diagnosis            | ICD-10-CM        |
| C83.96      | Non-follicular (diffuse) lymphoma, unspecified, intrapelvic lymph nodes                       | Diagnosis            | ICD-10-CM        |
| C83.97      | Non-follicular (diffuse) lymphoma, unspecified, spleen                                        | Diagnosis            | ICD-10-CM        |
| C83.98      | Non-follicular (diffuse) lymphoma, unspecified, lymph nodes of multiple sites                 | Diagnosis            | ICD-10-CM        |
| C83.99      | Non-follicular (diffuse) lymphoma, unspecified, extranodal and solid organ sites              | Diagnosis            | ICD-10-CM        |
| C84.00      | Mycosis fungoides, unspecified site                                                           | Diagnosis            | ICD-10-CM        |
| C84.01      | Mycosis fungoides, lymph nodes of head, face, and neck                                        | Diagnosis            | ICD-10-CM        |
| C84.02      | Mycosis fungoides, intrathoracic lymph nodes                                                  | Diagnosis            | ICD-10-CM        |
| C84.03      | Mycosis fungoides, intra-abdominal lymph nodes                                                | Diagnosis            | ICD-10-CM        |
| C84.04      | Mycosis fungoides, lymph nodes of axilla and upper limb                                       | Diagnosis            | ICD-10-CM        |
| C84.05      | Mycosis fungoides, lymph nodes of inguinal region and lower limb                              | Diagnosis            | ICD-10-CM        |
| C84.06      | Mycosis fungoides, intrapelvic lymph nodes                                                    | Diagnosis            | ICD-10-CM        |
| C84.07      | Mycosis fungoides, spleen                                                                     | Diagnosis            | ICD-10-CM        |
| C84.08      | Mycosis fungoides, lymph nodes of multiple sites                                              | Diagnosis            | ICD-10-CM        |
| C84.09      | Mycosis fungoides, extranodal and solid organ sites                                           | Diagnosis            | ICD-10-CM        |
| C84.10      | Sezary disease, unspecified site                                                              | Diagnosis            | ICD-10-CM        |
| C84.11      | Sezary disease, lymph nodes of head, face, and neck                                           | Diagnosis            | ICD-10-CM        |
| C84.12      | Sezary disease, intrathoracic lymph nodes                                                     | Diagnosis            | ICD-10-CM        |
| C84.13      | Sezary disease, intra-abdominal lymph nodes                                                   | Diagnosis            | ICD-10-CM        |
| C84.14      | Sezary disease, lymph nodes of axilla and upper limb                                          | Diagnosis            | ICD-10-CM        |
| C84.15      | Sezary disease, lymph nodes of inguinal region and lower limb                                 | Diagnosis            | ICD-10-CM        |
| C84.16      | Sezary disease, intrapelvic lymph nodes                                                       | Diagnosis            | ICD-10-CM        |
| C84.17      | Sezary disease, spleen                                                                        | Diagnosis            | ICD-10-CM        |
| C84.18      | Sezary disease, lymph nodes of multiple sites                                                 | Diagnosis            | ICD-10-CM        |
| C84.19      | Sezary disease, extranodal and solid organ sites                                              | Diagnosis            | ICD-10-CM        |
| C84.40      | Peripheral T-cell lymphoma, not classified, unspecified site                                  | Diagnosis            | ICD-10-CM        |

| <b>Code</b> | <b>Description</b>                                                                          | <b>Code Category</b> | <b>Code Type</b> |
|-------------|---------------------------------------------------------------------------------------------|----------------------|------------------|
| C84.41      | Peripheral T-cell lymphoma, not classified, lymph nodes of head, face, and neck             | Diagnosis            | ICD-10-CM        |
| C84.42      | Peripheral T-cell lymphoma, not classified, intrathoracic lymph nodes                       | Diagnosis            | ICD-10-CM        |
| C84.43      | Peripheral T-cell lymphoma, not classified, intra-abdominal lymph nodes                     | Diagnosis            | ICD-10-CM        |
| C84.44      | Peripheral T-cell lymphoma, not classified, lymph nodes of axilla and upper limb            | Diagnosis            | ICD-10-CM        |
| C84.45      | Peripheral T-cell lymphoma, not classified, lymph nodes of inguinal region and lower limb   | Diagnosis            | ICD-10-CM        |
| C84.46      | Peripheral T-cell lymphoma, not classified, intrapelvic lymph nodes                         | Diagnosis            | ICD-10-CM        |
| C84.47      | Peripheral T-cell lymphoma, not classified, spleen                                          | Diagnosis            | ICD-10-CM        |
| C84.48      | Peripheral T-cell lymphoma, not classified, lymph nodes of multiple sites                   | Diagnosis            | ICD-10-CM        |
| C84.49      | Peripheral T-cell lymphoma, not classified, extranodal and solid organ sites                | Diagnosis            | ICD-10-CM        |
| C84.60      | Anaplastic large cell lymphoma, ALK-positive, unspecified site                              | Diagnosis            | ICD-10-CM        |
| C84.61      | Anaplastic large cell lymphoma, ALK-positive, lymph nodes of head, face, and neck           | Diagnosis            | ICD-10-CM        |
| C84.62      | Anaplastic large cell lymphoma, ALK-positive, intrathoracic lymph nodes                     | Diagnosis            | ICD-10-CM        |
| C84.63      | Anaplastic large cell lymphoma, ALK-positive, intra-abdominal lymph nodes                   | Diagnosis            | ICD-10-CM        |
| C84.64      | Anaplastic large cell lymphoma, ALK-positive, lymph nodes of axilla and upper limb          | Diagnosis            | ICD-10-CM        |
| C84.65      | Anaplastic large cell lymphoma, ALK-positive, lymph nodes of inguinal region and lower limb | Diagnosis            | ICD-10-CM        |
| C84.66      | Anaplastic large cell lymphoma, ALK-positive, intrapelvic lymph nodes                       | Diagnosis            | ICD-10-CM        |
| C84.67      | Anaplastic large cell lymphoma, ALK-positive, spleen                                        | Diagnosis            | ICD-10-CM        |
| C84.68      | Anaplastic large cell lymphoma, ALK-positive, lymph nodes of multiple sites                 | Diagnosis            | ICD-10-CM        |
| C84.69      | Anaplastic large cell lymphoma, ALK-positive, extranodal and solid organ sites              | Diagnosis            | ICD-10-CM        |
| C84.70      | Anaplastic large cell lymphoma, ALK-negative, unspecified site                              | Diagnosis            | ICD-10-CM        |
| C84.71      | Anaplastic large cell lymphoma, ALK-negative, lymph nodes of head, face, and neck           | Diagnosis            | ICD-10-CM        |
| C84.72      | Anaplastic large cell lymphoma, ALK-negative, intrathoracic lymph nodes                     | Diagnosis            | ICD-10-CM        |
| C84.73      | Anaplastic large cell lymphoma, ALK-negative, intra-abdominal lymph nodes                   | Diagnosis            | ICD-10-CM        |
| C84.74      | Anaplastic large cell lymphoma, ALK-negative, lymph nodes of axilla and upper limb          | Diagnosis            | ICD-10-CM        |
| C84.75      | Anaplastic large cell lymphoma, ALK-negative, lymph nodes of inguinal region and lower limb | Diagnosis            | ICD-10-CM        |
| C84.76      | Anaplastic large cell lymphoma, ALK-negative, intrapelvic lymph nodes                       | Diagnosis            | ICD-10-CM        |
| C84.77      | Anaplastic large cell lymphoma, ALK-negative, spleen                                        | Diagnosis            | ICD-10-CM        |
| C84.78      | Anaplastic large cell lymphoma, ALK-negative, lymph nodes of multiple sites                 | Diagnosis            | ICD-10-CM        |
| C84.79      | Anaplastic large cell lymphoma, ALK-negative, extranodal and solid organ sites              | Diagnosis            | ICD-10-CM        |
| C84.90      | Mature T/NK-cell lymphomas, unspecified, unspecified site                                   | Diagnosis            | ICD-10-CM        |
| C84.91      | Mature T/NK-cell lymphomas, unspecified, lymph nodes of head, face, and neck                | Diagnosis            | ICD-10-CM        |
| C84.92      | Mature T/NK-cell lymphomas, unspecified, intrathoracic lymph nodes                          | Diagnosis            | ICD-10-CM        |
| C84.93      | Mature T/NK-cell lymphomas, unspecified, intra-abdominal lymph nodes                        | Diagnosis            | ICD-10-CM        |
| C84.94      | Mature T/NK-cell lymphomas, unspecified, lymph nodes of axilla and upper limb               | Diagnosis            | ICD-10-CM        |
| C84.95      | Mature T/NK-cell lymphomas, unspecified, lymph nodes of inguinal region and lower limb      | Diagnosis            | ICD-10-CM        |
| C84.96      | Mature T/NK-cell lymphomas, unspecified, intrapelvic lymph nodes                            | Diagnosis            | ICD-10-CM        |
| C84.97      | Mature T/NK-cell lymphomas, unspecified, spleen                                             | Diagnosis            | ICD-10-CM        |
| C84.98      | Mature T/NK-cell lymphomas, unspecified, lymph nodes of multiple sites                      | Diagnosis            | ICD-10-CM        |
| C84.99      | Mature T/NK-cell lymphomas, unspecified, extranodal and solid organ sites                   | Diagnosis            | ICD-10-CM        |
| C84.A0      | Cutaneous T-cell lymphoma, unspecified, unspecified site                                    | Diagnosis            | ICD-10-CM        |
| C84.A1      | Cutaneous T-cell lymphoma, unspecified lymph nodes of head, face, and neck                  | Diagnosis            | ICD-10-CM        |

| <b>Code</b> | <b>Description</b>                                                                        | <b>Code Category</b> | <b>Code Type</b> |
|-------------|-------------------------------------------------------------------------------------------|----------------------|------------------|
| C84.A2      | Cutaneous T-cell lymphoma, unspecified, intrathoracic lymph nodes                         | Diagnosis            | ICD-10-CM        |
| C84.A3      | Cutaneous T-cell lymphoma, unspecified, intra-abdominal lymph nodes                       | Diagnosis            | ICD-10-CM        |
| C84.A4      | Cutaneous T-cell lymphoma, unspecified, lymph nodes of axilla and upper limb              | Diagnosis            | ICD-10-CM        |
| C84.A5      | Cutaneous T-cell lymphoma, unspecified, lymph nodes of inguinal region and lower limb     | Diagnosis            | ICD-10-CM        |
| C84.A6      | Cutaneous T-cell lymphoma, unspecified, intrapelvic lymph nodes                           | Diagnosis            | ICD-10-CM        |
| C84.A7      | Cutaneous T-cell lymphoma, unspecified, spleen                                            | Diagnosis            | ICD-10-CM        |
| C84.A8      | Cutaneous T-cell lymphoma, unspecified, lymph nodes of multiple sites                     | Diagnosis            | ICD-10-CM        |
| C84.A9      | Cutaneous T-cell lymphoma, unspecified, extranodal and solid organ sites                  | Diagnosis            | ICD-10-CM        |
| C84.Z0      | Other mature T/NK-cell lymphomas, unspecified site                                        | Diagnosis            | ICD-10-CM        |
| C84.Z1      | Other mature T/NK-cell lymphomas, lymph nodes of head, face, and neck                     | Diagnosis            | ICD-10-CM        |
| C84.Z2      | Other mature T/NK-cell lymphomas, intrathoracic lymph nodes                               | Diagnosis            | ICD-10-CM        |
| C84.Z3      | Other mature T/NK-cell lymphomas, intra-abdominal lymph nodes                             | Diagnosis            | ICD-10-CM        |
| C84.Z4      | Other mature T/NK-cell lymphomas, lymph nodes of axilla and upper limb                    | Diagnosis            | ICD-10-CM        |
| C84.Z5      | Other mature T/NK-cell lymphomas, lymph nodes of inguinal region and lower limb           | Diagnosis            | ICD-10-CM        |
| C84.Z6      | Other mature T/NK-cell lymphomas, intrapelvic lymph nodes                                 | Diagnosis            | ICD-10-CM        |
| C84.Z7      | Other mature T/NK-cell lymphomas, spleen                                                  | Diagnosis            | ICD-10-CM        |
| C84.Z8      | Other mature T/NK-cell lymphomas, lymph nodes of multiple sites                           | Diagnosis            | ICD-10-CM        |
| C84.Z9      | Other mature T/NK-cell lymphomas, extranodal and solid organ sites                        | Diagnosis            | ICD-10-CM        |
| C85.10      | Unspecified B-cell lymphoma, unspecified site                                             | Diagnosis            | ICD-10-CM        |
| C85.11      | Unspecified B-cell lymphoma, lymph nodes of head, face, and neck                          | Diagnosis            | ICD-10-CM        |
| C85.12      | Unspecified B-cell lymphoma, intrathoracic lymph nodes                                    | Diagnosis            | ICD-10-CM        |
| C85.13      | Unspecified B-cell lymphoma, intra-abdominal lymph nodes                                  | Diagnosis            | ICD-10-CM        |
| C85.14      | Unspecified B-cell lymphoma, lymph nodes of axilla and upper limb                         | Diagnosis            | ICD-10-CM        |
| C85.15      | Unspecified B-cell lymphoma, lymph nodes of inguinal region and lower limb                | Diagnosis            | ICD-10-CM        |
| C85.16      | Unspecified B-cell lymphoma, intrapelvic lymph nodes                                      | Diagnosis            | ICD-10-CM        |
| C85.17      | Unspecified B-cell lymphoma, spleen                                                       | Diagnosis            | ICD-10-CM        |
| C85.18      | Unspecified B-cell lymphoma, lymph nodes of multiple sites                                | Diagnosis            | ICD-10-CM        |
| C85.19      | Unspecified B-cell lymphoma, extranodal and solid organ sites                             | Diagnosis            | ICD-10-CM        |
| C85.20      | Mediastinal (thymic) large B-cell lymphoma, unspecified site                              | Diagnosis            | ICD-10-CM        |
| C85.21      | Mediastinal (thymic) large B-cell lymphoma, lymph nodes of head, face, and neck           | Diagnosis            | ICD-10-CM        |
| C85.22      | Mediastinal (thymic) large B-cell lymphoma, intrathoracic lymph nodes                     | Diagnosis            | ICD-10-CM        |
| C85.23      | Mediastinal (thymic) large B-cell lymphoma, intra-abdominal lymph nodes                   | Diagnosis            | ICD-10-CM        |
| C85.24      | Mediastinal (thymic) large B-cell lymphoma, lymph nodes of axilla and upper limb          | Diagnosis            | ICD-10-CM        |
| C85.25      | Mediastinal (thymic) large B-cell lymphoma, lymph nodes of inguinal region and lower limb | Diagnosis            | ICD-10-CM        |
| C85.26      | Mediastinal (thymic) large B-cell lymphoma, intrapelvic lymph nodes                       | Diagnosis            | ICD-10-CM        |
| C85.27      | Mediastinal (thymic) large B-cell lymphoma, spleen                                        | Diagnosis            | ICD-10-CM        |
| C85.28      | Mediastinal (thymic) large B-cell lymphoma, lymph nodes of multiple sites                 | Diagnosis            | ICD-10-CM        |
| C85.29      | Mediastinal (thymic) large B-cell lymphoma, extranodal and solid organ sites              | Diagnosis            | ICD-10-CM        |
| C85.80      | Other specified types of non-Hodgkin lymphoma, unspecified site                           | Diagnosis            | ICD-10-CM        |
| C85.81      | Other specified types of non-Hodgkin lymphoma, lymph nodes of head, face, and neck        | Diagnosis            | ICD-10-CM        |
| C85.82      | Other specified types of non-Hodgkin lymphoma, intrathoracic lymph nodes                  | Diagnosis            | ICD-10-CM        |
| C85.83      | Other specified types of non-Hodgkin lymphoma, intra-abdominal lymph nodes                | Diagnosis            | ICD-10-CM        |
| C85.84      | Other specified types of non-Hodgkin lymphoma, lymph nodes of axilla and upper limb       | Diagnosis            | ICD-10-CM        |

| <b>Code</b> | <b>Description</b>                                                                            | <b>Code Category</b> | <b>Code Type</b> |
|-------------|-----------------------------------------------------------------------------------------------|----------------------|------------------|
| C85.85      | Other specified types of non-Hodgkin lymphoma, lymph nodes of inguinal region and lower limb  | Diagnosis            | ICD-10-CM        |
| C85.86      | Other specified types of non-Hodgkin lymphoma, intrapelvic lymph nodes                        | Diagnosis            | ICD-10-CM        |
| C85.87      | Other specified types of non-Hodgkin lymphoma, spleen                                         | Diagnosis            | ICD-10-CM        |
| C85.88      | Other specified types of non-Hodgkin lymphoma, lymph nodes of multiple sites                  | Diagnosis            | ICD-10-CM        |
| C85.89      | Other specified types of non-Hodgkin lymphoma, extranodal and solid organ sites               | Diagnosis            | ICD-10-CM        |
| C85.90      | Non-Hodgkin lymphoma, unspecified, unspecified site                                           | Diagnosis            | ICD-10-CM        |
| C85.91      | Non-Hodgkin lymphoma, unspecified, lymph nodes of head, face, and neck                        | Diagnosis            | ICD-10-CM        |
| C85.92      | Non-Hodgkin lymphoma, unspecified, intrathoracic lymph nodes                                  | Diagnosis            | ICD-10-CM        |
| C85.93      | Non-Hodgkin lymphoma, unspecified, intra-abdominal lymph nodes                                | Diagnosis            | ICD-10-CM        |
| C85.94      | Non-Hodgkin lymphoma, unspecified, lymph nodes of axilla and upper limb                       | Diagnosis            | ICD-10-CM        |
| C85.95      | Non-Hodgkin lymphoma, unspecified, lymph nodes of inguinal region and lower limb              | Diagnosis            | ICD-10-CM        |
| C85.96      | Non-Hodgkin lymphoma, unspecified, intrapelvic lymph nodes                                    | Diagnosis            | ICD-10-CM        |
| C85.97      | Non-Hodgkin lymphoma, unspecified, spleen                                                     | Diagnosis            | ICD-10-CM        |
| C85.98      | Non-Hodgkin lymphoma, unspecified, lymph nodes of multiple sites                              | Diagnosis            | ICD-10-CM        |
| C85.99      | Non-Hodgkin lymphoma, unspecified, extranodal and solid organ sites                           | Diagnosis            | ICD-10-CM        |
| C86.0       | Extranodal NK/T-cell lymphoma, nasal type                                                     | Diagnosis            | ICD-10-CM        |
| C86.1       | Hepatosplenic T-cell lymphoma                                                                 | Diagnosis            | ICD-10-CM        |
| C86.2       | Enteropathy-type (intestinal) T-cell lymphoma                                                 | Diagnosis            | ICD-10-CM        |
| C86.3       | Subcutaneous panniculitis-like T-cell lymphoma                                                | Diagnosis            | ICD-10-CM        |
| C86.4       | Blastic NK-cell lymphoma                                                                      | Diagnosis            | ICD-10-CM        |
| C86.5       | Angioimmunoblastic T-cell lymphoma                                                            | Diagnosis            | ICD-10-CM        |
| C86.6       | Primary cutaneous CD30-positive T-cell proliferations                                         | Diagnosis            | ICD-10-CM        |
| C88.2       | Heavy chain disease                                                                           | Diagnosis            | ICD-10-CM        |
| C88.3       | Immunoproliferative small intestinal disease                                                  | Diagnosis            | ICD-10-CM        |
| C88.4       | Extranodal marginal zone B-cell lymphoma of mucosa-associated lymphoid tissue [MALT-lymphoma] | Diagnosis            | ICD-10-CM        |
| C88.8       | Other malignant immunoproliferative diseases                                                  | Diagnosis            | ICD-10-CM        |
| C88.9       | Malignant immunoproliferative disease, unspecified                                            | Diagnosis            | ICD-10-CM        |
| C90.00      | Multiple myeloma not having achieved remission                                                | Diagnosis            | ICD-10-CM        |
| C90.01      | Multiple myeloma in remission                                                                 | Diagnosis            | ICD-10-CM        |
| C90.02      | Multiple myeloma in relapse                                                                   | Diagnosis            | ICD-10-CM        |
| C90.10      | Plasma cell leukemia not having achieved remission                                            | Diagnosis            | ICD-10-CM        |
| C90.11      | Plasma cell leukemia in remission                                                             | Diagnosis            | ICD-10-CM        |
| C90.12      | Plasma cell leukemia in relapse                                                               | Diagnosis            | ICD-10-CM        |
| C90.20      | Extramedullary plasmacytoma not having achieved remission                                     | Diagnosis            | ICD-10-CM        |
| C90.21      | Extramedullary plasmacytoma in remission                                                      | Diagnosis            | ICD-10-CM        |
| C90.22      | Extramedullary plasmacytoma in relapse                                                        | Diagnosis            | ICD-10-CM        |
| C90.30      | Solitary plasmacytoma not having achieved remission                                           | Diagnosis            | ICD-10-CM        |
| C90.31      | Solitary plasmacytoma in remission                                                            | Diagnosis            | ICD-10-CM        |
| C90.32      | Solitary plasmacytoma in relapse                                                              | Diagnosis            | ICD-10-CM        |
| C91.00      | Acute lymphoblastic leukemia not having achieved remission                                    | Diagnosis            | ICD-10-CM        |
| C91.01      | Acute lymphoblastic leukemia, in remission                                                    | Diagnosis            | ICD-10-CM        |
| C91.02      | Acute lymphoblastic leukemia, in relapse                                                      | Diagnosis            | ICD-10-CM        |
| C91.10      | Chronic lymphocytic leukemia of B-cell type not having achieved remission                     | Diagnosis            | ICD-10-CM        |

| <b>Code</b> | <b>Description</b>                                                                 | <b>Code Category</b> | <b>Code Type</b> |
|-------------|------------------------------------------------------------------------------------|----------------------|------------------|
| C91.11      | Chronic lymphocytic leukemia of B-cell type in remission                           | Diagnosis            | ICD-10-CM        |
| C91.12      | Chronic lymphocytic leukemia of B-cell type in relapse                             | Diagnosis            | ICD-10-CM        |
| C91.30      | Prolymphocytic leukemia of B-cell type not having achieved remission               | Diagnosis            | ICD-10-CM        |
| C91.31      | Prolymphocytic leukemia of B-cell type, in remission                               | Diagnosis            | ICD-10-CM        |
| C91.32      | Prolymphocytic leukemia of B-cell type, in relapse                                 | Diagnosis            | ICD-10-CM        |
| C91.40      | Hairy cell leukemia not having achieved remission                                  | Diagnosis            | ICD-10-CM        |
| C91.41      | Hairy cell leukemia, in remission                                                  | Diagnosis            | ICD-10-CM        |
| C91.42      | Hairy cell leukemia, in relapse                                                    | Diagnosis            | ICD-10-CM        |
| C91.50      | Adult T-cell lymphoma/leukemia (HTLV-1-associated) not having achieved remission   | Diagnosis            | ICD-10-CM        |
| C91.51      | Adult T-cell lymphoma/leukemia (HTLV-1-associated), in remission                   | Diagnosis            | ICD-10-CM        |
| C91.52      | Adult T-cell lymphoma/leukemia (HTLV-1-associated), in relapse                     | Diagnosis            | ICD-10-CM        |
| C91.60      | Prolymphocytic leukemia of T-cell type not having achieved remission               | Diagnosis            | ICD-10-CM        |
| C91.61      | Prolymphocytic leukemia of T-cell type, in remission                               | Diagnosis            | ICD-10-CM        |
| C91.62      | Prolymphocytic leukemia of T-cell type, in relapse                                 | Diagnosis            | ICD-10-CM        |
| C91.90      | Lymphoid leukemia, unspecified not having achieved remission                       | Diagnosis            | ICD-10-CM        |
| C91.91      | Lymphoid leukemia, unspecified, in remission                                       | Diagnosis            | ICD-10-CM        |
| C91.92      | Lymphoid leukemia, unspecified, in relapse                                         | Diagnosis            | ICD-10-CM        |
| C91.A0      | Mature B-cell leukemia Burkitt-type not having achieved remission                  | Diagnosis            | ICD-10-CM        |
| C91.A1      | Mature B-cell leukemia Burkitt-type, in remission                                  | Diagnosis            | ICD-10-CM        |
| C91.A2      | Mature B-cell leukemia Burkitt-type, in relapse                                    | Diagnosis            | ICD-10-CM        |
| C91.Z0      | Other lymphoid leukemia not having achieved remission                              | Diagnosis            | ICD-10-CM        |
| C91.Z1      | Other lymphoid leukemia, in remission                                              | Diagnosis            | ICD-10-CM        |
| C91.Z2      | Other lymphoid leukemia, in relapse                                                | Diagnosis            | ICD-10-CM        |
| C92.00      | Acute myeloblastic leukemia, not having achieved remission                         | Diagnosis            | ICD-10-CM        |
| C92.01      | Acute myeloblastic leukemia, in remission                                          | Diagnosis            | ICD-10-CM        |
| C92.02      | Acute myeloblastic leukemia, in relapse                                            | Diagnosis            | ICD-10-CM        |
| C92.10      | Chronic myeloid leukemia, BCR/ABL-positive, not having achieved remission          | Diagnosis            | ICD-10-CM        |
| C92.11      | Chronic myeloid leukemia, BCR/ABL-positive, in remission                           | Diagnosis            | ICD-10-CM        |
| C92.12      | Chronic myeloid leukemia, BCR/ABL-positive, in relapse                             | Diagnosis            | ICD-10-CM        |
| C92.20      | Atypical chronic myeloid leukemia, BCR/ABL-negative, not having achieved remission | Diagnosis            | ICD-10-CM        |
| C92.21      | Atypical chronic myeloid leukemia, BCR/ABL-negative, in remission                  | Diagnosis            | ICD-10-CM        |
| C92.22      | Atypical chronic myeloid leukemia, BCR/ABL-negative, in relapse                    | Diagnosis            | ICD-10-CM        |
| C92.30      | Myeloid sarcoma, not having achieved remission                                     | Diagnosis            | ICD-10-CM        |
| C92.31      | Myeloid sarcoma, in remission                                                      | Diagnosis            | ICD-10-CM        |
| C92.32      | Myeloid sarcoma, in relapse                                                        | Diagnosis            | ICD-10-CM        |
| C92.40      | Acute promyelocytic leukemia, not having achieved remission                        | Diagnosis            | ICD-10-CM        |
| C92.41      | Acute promyelocytic leukemia, in remission                                         | Diagnosis            | ICD-10-CM        |
| C92.42      | Acute promyelocytic leukemia, in relapse                                           | Diagnosis            | ICD-10-CM        |
| C92.50      | Acute myelomonocytic leukemia, not having achieved remission                       | Diagnosis            | ICD-10-CM        |
| C92.51      | Acute myelomonocytic leukemia, in remission                                        | Diagnosis            | ICD-10-CM        |
| C92.52      | Acute myelomonocytic leukemia, in relapse                                          | Diagnosis            | ICD-10-CM        |
| C92.60      | Acute myeloid leukemia with 11q23-abnormality not having achieved remission        | Diagnosis            | ICD-10-CM        |
| C92.61      | Acute myeloid leukemia with 11q23-abnormality in remission                         | Diagnosis            | ICD-10-CM        |
| C92.62      | Acute myeloid leukemia with 11q23-abnormality in relapse                           | Diagnosis            | ICD-10-CM        |
| C92.90      | Myeloid leukemia, unspecified, not having achieved remission                       | Diagnosis            | ICD-10-CM        |

| <b>Code</b> | <b>Description</b>                                                                | <b>Code Category</b> | <b>Code Type</b> |
|-------------|-----------------------------------------------------------------------------------|----------------------|------------------|
| C92.91      | Myeloid leukemia, unspecified in remission                                        | Diagnosis            | ICD-10-CM        |
| C92.92      | Myeloid leukemia, unspecified in relapse                                          | Diagnosis            | ICD-10-CM        |
| C92.A0      | Acute myeloid leukemia with multilineage dysplasia, not having achieved remission | Diagnosis            | ICD-10-CM        |
| C92.A1      | Acute myeloid leukemia with multilineage dysplasia, in remission                  | Diagnosis            | ICD-10-CM        |
| C92.A2      | Acute myeloid leukemia with multilineage dysplasia, in relapse                    | Diagnosis            | ICD-10-CM        |
| C92.Z0      | Other myeloid leukemia not having achieved remission                              | Diagnosis            | ICD-10-CM        |
| C92.Z1      | Other myeloid leukemia, in remission                                              | Diagnosis            | ICD-10-CM        |
| C92.Z2      | Other myeloid leukemia, in relapse                                                | Diagnosis            | ICD-10-CM        |
| C93.00      | Acute monoblastic/monocytic leukemia, not having achieved remission               | Diagnosis            | ICD-10-CM        |
| C93.01      | Acute monoblastic/monocytic leukemia, in remission                                | Diagnosis            | ICD-10-CM        |
| C93.02      | Acute monoblastic/monocytic leukemia, in relapse                                  | Diagnosis            | ICD-10-CM        |
| C93.10      | Chronic myelomonocytic leukemia not having achieved remission                     | Diagnosis            | ICD-10-CM        |
| C93.11      | Chronic myelomonocytic leukemia, in remission                                     | Diagnosis            | ICD-10-CM        |
| C93.12      | Chronic myelomonocytic leukemia, in relapse                                       | Diagnosis            | ICD-10-CM        |
| C93.30      | Juvenile myelomonocytic leukemia, not having achieved remission                   | Diagnosis            | ICD-10-CM        |
| C93.31      | Juvenile myelomonocytic leukemia, in remission                                    | Diagnosis            | ICD-10-CM        |
| C93.32      | Juvenile myelomonocytic leukemia, in relapse                                      | Diagnosis            | ICD-10-CM        |
| C93.90      | Monocytic leukemia, unspecified, not having achieved remission                    | Diagnosis            | ICD-10-CM        |
| C93.91      | Monocytic leukemia, unspecified in remission                                      | Diagnosis            | ICD-10-CM        |
| C93.92      | Monocytic leukemia, unspecified in relapse                                        | Diagnosis            | ICD-10-CM        |
| C93.Z0      | Other monocytic leukemia, not having achieved remission                           | Diagnosis            | ICD-10-CM        |
| C93.Z1      | Other monocytic leukemia, in remission                                            | Diagnosis            | ICD-10-CM        |
| C93.Z2      | Other monocytic leukemia, in relapse                                              | Diagnosis            | ICD-10-CM        |
| C94.00      | Acute erythroid leukemia, not having achieved remission                           | Diagnosis            | ICD-10-CM        |
| C94.01      | Acute erythroid leukemia, in remission                                            | Diagnosis            | ICD-10-CM        |
| C94.02      | Acute erythroid leukemia, in relapse                                              | Diagnosis            | ICD-10-CM        |
| C94.20      | Acute megakaryoblastic leukemia not having achieved remission                     | Diagnosis            | ICD-10-CM        |
| C94.21      | Acute megakaryoblastic leukemia, in remission                                     | Diagnosis            | ICD-10-CM        |
| C94.22      | Acute megakaryoblastic leukemia, in relapse                                       | Diagnosis            | ICD-10-CM        |
| C94.30      | Mast cell leukemia not having achieved remission                                  | Diagnosis            | ICD-10-CM        |
| C94.31      | Mast cell leukemia, in remission                                                  | Diagnosis            | ICD-10-CM        |
| C94.32      | Mast cell leukemia, in relapse                                                    | Diagnosis            | ICD-10-CM        |
| C94.80      | Other specified leukemias not having achieved remission                           | Diagnosis            | ICD-10-CM        |
| C94.81      | Other specified leukemias, in remission                                           | Diagnosis            | ICD-10-CM        |
| C94.82      | Other specified leukemias, in relapse                                             | Diagnosis            | ICD-10-CM        |
| C95.00      | Acute leukemia of unspecified cell type not having achieved remission             | Diagnosis            | ICD-10-CM        |
| C95.01      | Acute leukemia of unspecified cell type, in remission                             | Diagnosis            | ICD-10-CM        |
| C95.02      | Acute leukemia of unspecified cell type, in relapse                               | Diagnosis            | ICD-10-CM        |
| C95.10      | Chronic leukemia of unspecified cell type not having achieved remission           | Diagnosis            | ICD-10-CM        |
| C95.11      | Chronic leukemia of unspecified cell type, in remission                           | Diagnosis            | ICD-10-CM        |
| C95.12      | Chronic leukemia of unspecified cell type, in relapse                             | Diagnosis            | ICD-10-CM        |
| C95.90      | Leukemia, unspecified not having achieved remission                               | Diagnosis            | ICD-10-CM        |
| C95.91      | Leukemia, unspecified, in remission                                               | Diagnosis            | ICD-10-CM        |
| C95.92      | Leukemia, unspecified, in relapse                                                 | Diagnosis            | ICD-10-CM        |
| C96.0       | Multifocal and multisystemic (disseminated) Langerhans-cell histiocytosis         | Diagnosis            | ICD-10-CM        |

| <b>Code</b> | <b>Description</b>                                                                | <b>Code Category</b> | <b>Code Type</b> |
|-------------|-----------------------------------------------------------------------------------|----------------------|------------------|
| C96.20      | Malignant mast cell neoplasm, unspecified                                         | Diagnosis            | ICD-10-CM        |
| C96.21      | Aggressive systemic mastocytosis                                                  | Diagnosis            | ICD-10-CM        |
| C96.22      | Mast cell sarcoma                                                                 | Diagnosis            | ICD-10-CM        |
| C96.29      | Other malignant mast cell neoplasm                                                | Diagnosis            | ICD-10-CM        |
| C96.4       | Sarcoma of dendritic cells (accessory cells)                                      | Diagnosis            | ICD-10-CM        |
| C96.9       | Malignant neoplasm of lymphoid, hematopoietic and related tissue, unspecified     | Diagnosis            | ICD-10-CM        |
| C96.A       | Histiocytic sarcoma                                                               | Diagnosis            | ICD-10-CM        |
| C96.Z       | Other specified malignant neoplasms of lymphoid, hematopoietic and related tissue | Diagnosis            | ICD-10-CM        |
| D03.0       | Melanoma in situ of lip                                                           | Diagnosis            | ICD-10-CM        |
| D03.10      | Melanoma in situ of unspecified eyelid, including canthus                         | Diagnosis            | ICD-10-CM        |
| D03.11      | Melanoma in situ of right eyelid, including canthus                               | Diagnosis            | ICD-10-CM        |
| D03.12      | Melanoma in situ of left eyelid, including canthus                                | Diagnosis            | ICD-10-CM        |
| D03.20      | Melanoma in situ of unspecified ear and external auricular canal                  | Diagnosis            | ICD-10-CM        |
| D03.21      | Melanoma in situ of right ear and external auricular canal                        | Diagnosis            | ICD-10-CM        |
| D03.22      | Melanoma in situ of left ear and external auricular canal                         | Diagnosis            | ICD-10-CM        |
| D03.30      | Melanoma in situ of unspecified part of face                                      | Diagnosis            | ICD-10-CM        |
| D03.39      | Melanoma in situ of other parts of face                                           | Diagnosis            | ICD-10-CM        |
| D03.4       | Melanoma in situ of scalp and neck                                                | Diagnosis            | ICD-10-CM        |
| D03.51      | Melanoma in situ of anal skin                                                     | Diagnosis            | ICD-10-CM        |
| D03.52      | Melanoma in situ of breast (skin) (soft tissue)                                   | Diagnosis            | ICD-10-CM        |
| D03.59      | Melanoma in situ of other part of trunk                                           | Diagnosis            | ICD-10-CM        |
| D03.60      | Melanoma in situ of unspecified upper limb, including shoulder                    | Diagnosis            | ICD-10-CM        |
| D03.61      | Melanoma in situ of right upper limb, including shoulder                          | Diagnosis            | ICD-10-CM        |
| D03.62      | Melanoma in situ of left upper limb, including shoulder                           | Diagnosis            | ICD-10-CM        |
| D03.70      | Melanoma in situ of unspecified lower limb, including hip                         | Diagnosis            | ICD-10-CM        |
| D03.71      | Melanoma in situ of right lower limb, including hip                               | Diagnosis            | ICD-10-CM        |
| D03.72      | Melanoma in situ of left lower limb, including hip                                | Diagnosis            | ICD-10-CM        |
| D03.8       | Melanoma in situ of other sites                                                   | Diagnosis            | ICD-10-CM        |
| D03.9       | Melanoma in situ, unspecified                                                     | Diagnosis            | ICD-10-CM        |
| D45         | Polycythemia vera                                                                 | Diagnosis            | ICD-10-CM        |
| D37.01      | Neoplasm of uncertain behavior of lip                                             | Diagnosis            | ICD-10-CM        |
| D37.02      | Neoplasm of uncertain behavior of tongue                                          | Diagnosis            | ICD-10-CM        |
| D37.030     | Neoplasm of uncertain behavior of the parotid salivary glands                     | Diagnosis            | ICD-10-CM        |
| D37.031     | Neoplasm of uncertain behavior of the sublingual salivary glands                  | Diagnosis            | ICD-10-CM        |
| D37.032     | Neoplasm of uncertain behavior of the submandibular salivary glands               | Diagnosis            | ICD-10-CM        |
| D37.039     | Neoplasm of uncertain behavior of the major salivary glands, unspecified          | Diagnosis            | ICD-10-CM        |
| D37.04      | Neoplasm of uncertain behavior of the minor salivary glands                       | Diagnosis            | ICD-10-CM        |
| D37.05      | Neoplasm of uncertain behavior of pharynx                                         | Diagnosis            | ICD-10-CM        |
| D37.09      | Neoplasm of uncertain behavior of other specified sites of the oral cavity        | Diagnosis            | ICD-10-CM        |
| D37.1       | Neoplasm of uncertain behavior of stomach                                         | Diagnosis            | ICD-10-CM        |
| D37.2       | Neoplasm of uncertain behavior of small intestine                                 | Diagnosis            | ICD-10-CM        |
| D37.3       | Neoplasm of uncertain behavior of appendix                                        | Diagnosis            | ICD-10-CM        |
| D37.4       | Neoplasm of uncertain behavior of colon                                           | Diagnosis            | ICD-10-CM        |
| D37.5       | Neoplasm of uncertain behavior of rectum                                          | Diagnosis            | ICD-10-CM        |
| D37.6       | Neoplasm of uncertain behavior of liver, gallbladder and bile ducts               | Diagnosis            | ICD-10-CM        |



| <b>Code</b> | <b>Description</b>                                                                | <b>Code Category</b> | <b>Code Type</b> |
|-------------|-----------------------------------------------------------------------------------|----------------------|------------------|
| D37.8       | Neoplasm of uncertain behavior of other specified digestive organs                | Diagnosis            | ICD-10-CM        |
| D37.9       | Neoplasm of uncertain behavior of digestive organ, unspecified                    | Diagnosis            | ICD-10-CM        |
| D38.0       | Neoplasm of uncertain behavior of larynx                                          | Diagnosis            | ICD-10-CM        |
| D38.1       | Neoplasm of uncertain behavior of trachea, bronchus and lung                      | Diagnosis            | ICD-10-CM        |
| D38.2       | Neoplasm of uncertain behavior of pleura                                          | Diagnosis            | ICD-10-CM        |
| D38.3       | Neoplasm of uncertain behavior of mediastinum                                     | Diagnosis            | ICD-10-CM        |
| D38.4       | Neoplasm of uncertain behavior of thymus                                          | Diagnosis            | ICD-10-CM        |
| D38.5       | Neoplasm of uncertain behavior of other respiratory organs                        | Diagnosis            | ICD-10-CM        |
| D38.6       | Neoplasm of uncertain behavior of respiratory organ, unspecified                  | Diagnosis            | ICD-10-CM        |
| D39.0       | Neoplasm of uncertain behavior of uterus                                          | Diagnosis            | ICD-10-CM        |
| D39.10      | Neoplasm of uncertain behavior of unspecified ovary                               | Diagnosis            | ICD-10-CM        |
| D39.11      | Neoplasm of uncertain behavior of right ovary                                     | Diagnosis            | ICD-10-CM        |
| D39.12      | Neoplasm of uncertain behavior of left ovary                                      | Diagnosis            | ICD-10-CM        |
| D39.2       | Neoplasm of uncertain behavior of placenta                                        | Diagnosis            | ICD-10-CM        |
| D39.8       | Neoplasm of uncertain behavior of other specified female genital organs           | Diagnosis            | ICD-10-CM        |
| D39.9       | Neoplasm of uncertain behavior of female genital organ, unspecified               | Diagnosis            | ICD-10-CM        |
| D40.0       | Neoplasm of uncertain behavior of prostate                                        | Diagnosis            | ICD-10-CM        |
| D40.10      | Neoplasm of uncertain behavior of unspecified testis                              | Diagnosis            | ICD-10-CM        |
| D40.11      | Neoplasm of uncertain behavior of right testis                                    | Diagnosis            | ICD-10-CM        |
| D40.12      | Neoplasm of uncertain behavior of left testis                                     | Diagnosis            | ICD-10-CM        |
| D40.8       | Neoplasm of uncertain behavior of other specified male genital organs             | Diagnosis            | ICD-10-CM        |
| D40.9       | Neoplasm of uncertain behavior of male genital organ, unspecified                 | Diagnosis            | ICD-10-CM        |
| D41.00      | Neoplasm of uncertain behavior of unspecified kidney                              | Diagnosis            | ICD-10-CM        |
| D41.01      | Neoplasm of uncertain behavior of right kidney                                    | Diagnosis            | ICD-10-CM        |
| D41.02      | Neoplasm of uncertain behavior of left kidney                                     | Diagnosis            | ICD-10-CM        |
| D41.10      | Neoplasm of uncertain behavior of unspecified renal pelvis                        | Diagnosis            | ICD-10-CM        |
| D41.11      | Neoplasm of uncertain behavior of right renal pelvis                              | Diagnosis            | ICD-10-CM        |
| D41.12      | Neoplasm of uncertain behavior of left renal pelvis                               | Diagnosis            | ICD-10-CM        |
| D41.20      | Neoplasm of uncertain behavior of unspecified ureter                              | Diagnosis            | ICD-10-CM        |
| D41.21      | Neoplasm of uncertain behavior of right ureter                                    | Diagnosis            | ICD-10-CM        |
| D41.22      | Neoplasm of uncertain behavior of left ureter                                     | Diagnosis            | ICD-10-CM        |
| D41.3       | Neoplasm of uncertain behavior of urethra                                         | Diagnosis            | ICD-10-CM        |
| D41.4       | Neoplasm of uncertain behavior of bladder                                         | Diagnosis            | ICD-10-CM        |
| D41.8       | Neoplasm of uncertain behavior of other specified urinary organs                  | Diagnosis            | ICD-10-CM        |
| D41.9       | Neoplasm of uncertain behavior of unspecified urinary organ                       | Diagnosis            | ICD-10-CM        |
| D42.0       | Neoplasm of uncertain behavior of cerebral meninges                               | Diagnosis            | ICD-10-CM        |
| D42.1       | Neoplasm of uncertain behavior of spinal meninges                                 | Diagnosis            | ICD-10-CM        |
| D42.9       | Neoplasm of uncertain behavior of meninges, unspecified                           | Diagnosis            | ICD-10-CM        |
| D43.0       | Neoplasm of uncertain behavior of brain, supratentorial                           | Diagnosis            | ICD-10-CM        |
| D43.1       | Neoplasm of uncertain behavior of brain, infratentorial                           | Diagnosis            | ICD-10-CM        |
| D43.2       | Neoplasm of uncertain behavior of brain, unspecified                              | Diagnosis            | ICD-10-CM        |
| D43.3       | Neoplasm of uncertain behavior of cranial nerves                                  | Diagnosis            | ICD-10-CM        |
| D43.4       | Neoplasm of uncertain behavior of spinal cord                                     | Diagnosis            | ICD-10-CM        |
| D43.8       | Neoplasm of uncertain behavior of other specified parts of central nervous system | Diagnosis            | ICD-10-CM        |
| D43.9       | Neoplasm of uncertain behavior of central nervous system, unspecified             | Diagnosis            | ICD-10-CM        |

| <b>Code</b> | <b>Description</b>                                                                            | <b>Code Category</b> | <b>Code Type</b> |
|-------------|-----------------------------------------------------------------------------------------------|----------------------|------------------|
| D44.0       | Neoplasm of uncertain behavior of thyroid gland                                               | Diagnosis            | ICD-10-CM        |
| D44.10      | Neoplasm of uncertain behavior of unspecified adrenal gland                                   | Diagnosis            | ICD-10-CM        |
| D44.11      | Neoplasm of uncertain behavior of right adrenal gland                                         | Diagnosis            | ICD-10-CM        |
| D44.12      | Neoplasm of uncertain behavior of left adrenal gland                                          | Diagnosis            | ICD-10-CM        |
| D44.2       | Neoplasm of uncertain behavior of parathyroid gland                                           | Diagnosis            | ICD-10-CM        |
| D44.3       | Neoplasm of uncertain behavior of pituitary gland                                             | Diagnosis            | ICD-10-CM        |
| D44.4       | Neoplasm of uncertain behavior of craniopharyngeal duct                                       | Diagnosis            | ICD-10-CM        |
| D44.5       | Neoplasm of uncertain behavior of pineal gland                                                | Diagnosis            | ICD-10-CM        |
| D44.6       | Neoplasm of uncertain behavior of carotid body                                                | Diagnosis            | ICD-10-CM        |
| D44.7       | Neoplasm of uncertain behavior of aortic body and other paraganglia                           | Diagnosis            | ICD-10-CM        |
| D44.9       | Neoplasm of uncertain behavior of unspecified endocrine gland                                 | Diagnosis            | ICD-10-CM        |
| D47.01      | Cutaneous mastocytosis                                                                        | Diagnosis            | ICD-10-CM        |
| D47.02      | Systemic mastocytosis                                                                         | Diagnosis            | ICD-10-CM        |
| D47.09      | Other mast cell neoplasms of uncertain behavior                                               | Diagnosis            | ICD-10-CM        |
| D47.Z9      | Other specified neoplasms of uncertain behavior of lymphoid, hematopoietic and related tissue | Diagnosis            | ICD-10-CM        |
| D48.0       | Neoplasm of uncertain behavior of bone and articular cartilage                                | Diagnosis            | ICD-10-CM        |
| D48.1       | Neoplasm of uncertain behavior of connective and other soft tissue                            | Diagnosis            | ICD-10-CM        |
| D48.2       | Neoplasm of uncertain behavior of peripheral nerves and autonomic nervous system              | Diagnosis            | ICD-10-CM        |
| D48.3       | Neoplasm of uncertain behavior of retroperitoneum                                             | Diagnosis            | ICD-10-CM        |
| D48.4       | Neoplasm of uncertain behavior of peritoneum                                                  | Diagnosis            | ICD-10-CM        |
| D48.60      | Neoplasm of uncertain behavior of unspecified breast                                          | Diagnosis            | ICD-10-CM        |
| D48.61      | Neoplasm of uncertain behavior of right breast                                                | Diagnosis            | ICD-10-CM        |
| D48.62      | Neoplasm of uncertain behavior of left breast                                                 | Diagnosis            | ICD-10-CM        |
| D48.7       | Neoplasm of uncertain behavior of other specified sites                                       | Diagnosis            | ICD-10-CM        |
| Q85.02      | Neurofibromatosis, type 2                                                                     | Diagnosis            | ICD-10-CM        |
| Q85.03      | Schwannomatosis                                                                               | Diagnosis            | ICD-10-CM        |
| Q85.09      | Other neurofibromatosis                                                                       | Diagnosis            | ICD-10-CM        |
| C00         | Malignant neoplasm of lip                                                                     | Diagnosis            | ICD-10-CM        |
| C02         | Malignant neoplasm of other and unspecified parts of tongue                                   | Diagnosis            | ICD-10-CM        |
| C03         | Malignant neoplasm of gum                                                                     | Diagnosis            | ICD-10-CM        |
| C04         | Malignant neoplasm of floor of mouth                                                          | Diagnosis            | ICD-10-CM        |
| C05         | Malignant neoplasm of palate                                                                  | Diagnosis            | ICD-10-CM        |
| C06         | Malignant neoplasm of other and unspecified parts of mouth                                    | Diagnosis            | ICD-10-CM        |
| C06.8       | Malignant neoplasm of overlapping sites of other and unspecified parts of mouth               | Diagnosis            | ICD-10-CM        |
| C08         | Malignant neoplasm of other and unspecified major salivary glands                             | Diagnosis            | ICD-10-CM        |
| C09         | Malignant neoplasm of tonsil                                                                  | Diagnosis            | ICD-10-CM        |
| C10         | Malignant neoplasm of oropharynx                                                              | Diagnosis            | ICD-10-CM        |
| C11         | Malignant neoplasm of nasopharynx                                                             | Diagnosis            | ICD-10-CM        |
| C13         | Malignant neoplasm of hypopharynx                                                             | Diagnosis            | ICD-10-CM        |
| C14         | Malignant neoplasm of other and ill-defined sites in the lip, oral cavity and pharynx         | Diagnosis            | ICD-10-CM        |
| C15         | Malignant neoplasm of esophagus                                                               | Diagnosis            | ICD-10-CM        |
| C16         | Malignant neoplasm of stomach                                                                 | Diagnosis            | ICD-10-CM        |
| C17         | Malignant neoplasm of small intestine                                                         | Diagnosis            | ICD-10-CM        |
| C18         | Malignant neoplasm of colon                                                                   | Diagnosis            | ICD-10-CM        |

| <b>Code</b> | <b>Description</b>                                                                                   | <b>Code Category</b> | <b>Code Type</b> |
|-------------|------------------------------------------------------------------------------------------------------|----------------------|------------------|
| C21         | Malignant neoplasm of anus and anal canal                                                            | Diagnosis            | ICD-10-CM        |
| C22         | Malignant neoplasm of liver and intrahepatic bile ducts                                              | Diagnosis            | ICD-10-CM        |
| C24         | Malignant neoplasm of other and unspecified parts of biliary tract                                   | Diagnosis            | ICD-10-CM        |
| C25         | Malignant neoplasm of pancreas                                                                       | Diagnosis            | ICD-10-CM        |
| C26         | Malignant neoplasm of other and ill-defined digestive organs                                         | Diagnosis            | ICD-10-CM        |
| C30         | Malignant neoplasm of nasal cavity and middle ear                                                    | Diagnosis            | ICD-10-CM        |
| C31         | Malignant neoplasm of accessory sinuses                                                              | Diagnosis            | ICD-10-CM        |
| C32         | Malignant neoplasm of larynx                                                                         | Diagnosis            | ICD-10-CM        |
| C34         | Malignant neoplasm of bronchus and lung                                                              | Diagnosis            | ICD-10-CM        |
| C34.0       | Malignant neoplasm of main bronchus                                                                  | Diagnosis            | ICD-10-CM        |
| C34.1       | Malignant neoplasm of upper lobe, bronchus or lung                                                   | Diagnosis            | ICD-10-CM        |
| C34.3       | Malignant neoplasm of lower lobe, bronchus or lung                                                   | Diagnosis            | ICD-10-CM        |
| C34.8       | Malignant neoplasm of overlapping sites of bronchus and lung                                         | Diagnosis            | ICD-10-CM        |
| C34.9       | Malignant neoplasm of unspecified part of bronchus or lung                                           | Diagnosis            | ICD-10-CM        |
| C38         | Malignant neoplasm of heart, mediastinum and pleura                                                  | Diagnosis            | ICD-10-CM        |
| C39         | Malignant neoplasm of other and ill-defined sites in the respiratory system and intrathoracic organs | Diagnosis            | ICD-10-CM        |
| C40         | Malignant neoplasm of bone and articular cartilage of limbs                                          | Diagnosis            | ICD-10-CM        |
| C40.0       | Malignant neoplasm of scapula and long bones of upper limb                                           | Diagnosis            | ICD-10-CM        |
| C40.1       | Malignant neoplasm of short bones of upper limb                                                      | Diagnosis            | ICD-10-CM        |
| C40.2       | Malignant neoplasm of long bones of lower limb                                                       | Diagnosis            | ICD-10-CM        |
| C40.3       | Malignant neoplasm of short bones of lower limb                                                      | Diagnosis            | ICD-10-CM        |
| C40.8       | Malignant neoplasm of overlapping sites of bone and articular cartilage of limb                      | Diagnosis            | ICD-10-CM        |
| C40.9       | Malignant neoplasm of unspecified bones and articular cartilage of limb                              | Diagnosis            | ICD-10-CM        |
| C41         | Malignant neoplasm of bone and articular cartilage of other and unspecified sites                    | Diagnosis            | ICD-10-CM        |
| C43         | Malignant melanoma of skin                                                                           | Diagnosis            | ICD-10-CM        |
| C43.1       | Malignant melanoma of eyelid, including canthus                                                      | Diagnosis            | ICD-10-CM        |
| C43.111     | Malignant melanoma of right upper eyelid, including canthus                                          | Diagnosis            | ICD-10-CM        |
| C43.112     | Malignant melanoma of right lower eyelid, including canthus                                          | Diagnosis            | ICD-10-CM        |
| C43.121     | Malignant melanoma of left upper eyelid, including canthus                                           | Diagnosis            | ICD-10-CM        |
| C43.122     | Malignant melanoma of left lower eyelid, including canthus                                           | Diagnosis            | ICD-10-CM        |
| C43.2       | Malignant melanoma of ear and external auricular canal                                               | Diagnosis            | ICD-10-CM        |
| C43.3       | Malignant melanoma of other and unspecified parts of face                                            | Diagnosis            | ICD-10-CM        |
| C43.5       | Malignant melanoma of trunk                                                                          | Diagnosis            | ICD-10-CM        |
| C43.6       | Malignant melanoma of upper limb, including shoulder                                                 | Diagnosis            | ICD-10-CM        |
| C43.7       | Malignant melanoma of lower limb, including hip                                                      | Diagnosis            | ICD-10-CM        |
| C44         | Other and unspecified malignant neoplasm of skin                                                     | Diagnosis            | ICD-10-CM        |
| C44.0       | Other and unspecified malignant neoplasm of skin of lip                                              | Diagnosis            | ICD-10-CM        |
| C44.00      | Unspecified malignant neoplasm of skin of lip                                                        | Diagnosis            | ICD-10-CM        |
| C44.09      | Other specified malignant neoplasm of skin of lip                                                    | Diagnosis            | ICD-10-CM        |
| C44.1       | Other and unspecified malignant neoplasm of skin of eyelid, including canthus                        | Diagnosis            | ICD-10-CM        |
| C44.10      | Unspecified malignant neoplasm of skin of eyelid, including canthus                                  | Diagnosis            | ICD-10-CM        |
| C44.101     | Unspecified malignant neoplasm of skin of unspecified eyelid, including canthus                      | Diagnosis            | ICD-10-CM        |
| C44.102     | Unspecified malignant neoplasm of skin of right eyelid, including canthus                            | Diagnosis            | ICD-10-CM        |
| C44.1021    | Unspecified malignant neoplasm of skin of right upper eyelid, including canthus                      | Diagnosis            | ICD-10-CM        |

| <b>Code</b> | <b>Description</b>                                                                         | <b>Code Category</b> | <b>Code Type</b> |
|-------------|--------------------------------------------------------------------------------------------|----------------------|------------------|
| C44.1022    | Unspecified malignant neoplasm of skin of right lower eyelid, including canthus            | Diagnosis            | ICD-10-CM        |
| C44.109     | Unspecified malignant neoplasm of skin of left eyelid, including canthus                   | Diagnosis            | ICD-10-CM        |
| C44.1091    | Unspecified malignant neoplasm of skin of left upper eyelid, including canthus             | Diagnosis            | ICD-10-CM        |
| C44.1092    | Unspecified malignant neoplasm of skin of left lower eyelid, including canthus             | Diagnosis            | ICD-10-CM        |
| C44.13      | Sebaceous cell carcinoma of skin of eyelid, including canthus                              | Diagnosis            | ICD-10-CM        |
| C44.131     | Sebaceous cell carcinoma of skin of unspecified eyelid, including canthus                  | Diagnosis            | ICD-10-CM        |
| C44.132     | Sebaceous cell carcinoma of skin of right eyelid, including canthus                        | Diagnosis            | ICD-10-CM        |
| C44.1321    | Sebaceous cell carcinoma of skin of right upper eyelid, including canthus                  | Diagnosis            | ICD-10-CM        |
| C44.1322    | Sebaceous cell carcinoma of skin of right lower eyelid, including canthus                  | Diagnosis            | ICD-10-CM        |
| C44.139     | Sebaceous cell carcinoma of skin of left eyelid, including canthus                         | Diagnosis            | ICD-10-CM        |
| C44.1391    | Sebaceous cell carcinoma of skin of left upper eyelid, including canthus                   | Diagnosis            | ICD-10-CM        |
| C44.1392    | Sebaceous cell carcinoma of skin of left lower eyelid, including canthus                   | Diagnosis            | ICD-10-CM        |
| C44.19      | Other specified malignant neoplasm of skin of eyelid, including canthus                    | Diagnosis            | ICD-10-CM        |
| C44.191     | Other specified malignant neoplasm of skin of unspecified eyelid, including canthus        | Diagnosis            | ICD-10-CM        |
| C44.192     | Other specified malignant neoplasm of skin of right eyelid, including canthus              | Diagnosis            | ICD-10-CM        |
| C44.1921    | Other specified malignant neoplasm of skin of right upper eyelid, including canthus        | Diagnosis            | ICD-10-CM        |
| C44.1922    | Other specified malignant neoplasm of skin of right lower eyelid, including canthus        | Diagnosis            | ICD-10-CM        |
| C44.199     | Other specified malignant neoplasm of skin of left eyelid, including canthus               | Diagnosis            | ICD-10-CM        |
| C44.1991    | Other specified malignant neoplasm of skin of left upper eyelid, including canthus         | Diagnosis            | ICD-10-CM        |
| C44.1992    | Other specified malignant neoplasm of skin of left lower eyelid, including canthus         | Diagnosis            | ICD-10-CM        |
| C44.2       | Other and unspecified malignant neoplasm of skin of ear and external auricular canal       | Diagnosis            | ICD-10-CM        |
| C44.20      | Unspecified malignant neoplasm of skin of ear and external auricular canal                 | Diagnosis            | ICD-10-CM        |
| C44.201     | Unspecified malignant neoplasm of skin of unspecified ear and external auricular canal     | Diagnosis            | ICD-10-CM        |
| C44.202     | Unspecified malignant neoplasm of skin of right ear and external auricular canal           | Diagnosis            | ICD-10-CM        |
| C44.209     | Unspecified malignant neoplasm of skin of left ear and external auricular canal            | Diagnosis            | ICD-10-CM        |
| C44.29      | Other specified malignant neoplasm of skin of ear and external auricular canal             | Diagnosis            | ICD-10-CM        |
| C44.291     | Other specified malignant neoplasm of skin of unspecified ear and external auricular canal | Diagnosis            | ICD-10-CM        |
| C44.292     | Other specified malignant neoplasm of skin of right ear and external auricular canal       | Diagnosis            | ICD-10-CM        |
| C44.299     | Other specified malignant neoplasm of skin of left ear and external auricular canal        | Diagnosis            | ICD-10-CM        |
| C44.3       | Other and unspecified malignant neoplasm of skin of other and unspecified parts of face    | Diagnosis            | ICD-10-CM        |
| C44.30      | Unspecified malignant neoplasm of skin of other and unspecified parts of face              | Diagnosis            | ICD-10-CM        |
| C44.300     | Unspecified malignant neoplasm of skin of unspecified part of face                         | Diagnosis            | ICD-10-CM        |
| C44.301     | Unspecified malignant neoplasm of skin of nose                                             | Diagnosis            | ICD-10-CM        |
| C44.309     | Unspecified malignant neoplasm of skin of other parts of face                              | Diagnosis            | ICD-10-CM        |
| C44.39      | Other specified malignant neoplasm of skin of other and unspecified parts of face          | Diagnosis            | ICD-10-CM        |
| C44.390     | Other specified malignant neoplasm of skin of unspecified parts of face                    | Diagnosis            | ICD-10-CM        |
| C44.391     | Other specified malignant neoplasm of skin of nose                                         | Diagnosis            | ICD-10-CM        |
| C44.399     | Other specified malignant neoplasm of skin of other parts of face                          | Diagnosis            | ICD-10-CM        |
| C44.4       | Other and unspecified malignant neoplasm of skin of scalp and neck                         | Diagnosis            | ICD-10-CM        |
| C44.40      | Unspecified malignant neoplasm of skin of scalp and neck                                   | Diagnosis            | ICD-10-CM        |
| C44.49      | Other specified malignant neoplasm of skin of scalp and neck                               | Diagnosis            | ICD-10-CM        |
| C44.5       | Other and unspecified malignant neoplasm of skin of trunk                                  | Diagnosis            | ICD-10-CM        |

| Code    | Description                                                                              | Code      |           |
|---------|------------------------------------------------------------------------------------------|-----------|-----------|
|         |                                                                                          | Category  | Code Type |
| C44.50  | Unspecified malignant neoplasm of skin of trunk                                          | Diagnosis | ICD-10-CM |
| C44.500 | Unspecified malignant neoplasm of anal skin                                              | Diagnosis | ICD-10-CM |
| C44.501 | Unspecified malignant neoplasm of skin of breast                                         | Diagnosis | ICD-10-CM |
| C44.509 | Unspecified malignant neoplasm of skin of other part of trunk                            | Diagnosis | ICD-10-CM |
| C44.59  | Other specified malignant neoplasm of skin of trunk                                      | Diagnosis | ICD-10-CM |
| C44.590 | Other specified malignant neoplasm of anal skin                                          | Diagnosis | ICD-10-CM |
| C44.591 | Other specified malignant neoplasm of skin of breast                                     | Diagnosis | ICD-10-CM |
| C44.599 | Other specified malignant neoplasm of skin of other part of trunk                        | Diagnosis | ICD-10-CM |
| C44.6   | Other and unspecified malignant neoplasm of skin of upper limb, including shoulder       | Diagnosis | ICD-10-CM |
| C44.60  | Unspecified malignant neoplasm of skin of upper limb, including shoulder                 | Diagnosis | ICD-10-CM |
| C44.601 | Unspecified malignant neoplasm of skin of unspecified upper limb, including shoulder     | Diagnosis | ICD-10-CM |
| C44.602 | Unspecified malignant neoplasm of skin of right upper limb, including shoulder           | Diagnosis | ICD-10-CM |
| C44.609 | Unspecified malignant neoplasm of skin of left upper limb, including shoulder            | Diagnosis | ICD-10-CM |
| C44.69  | Other specified malignant neoplasm of skin of upper limb, including shoulder             | Diagnosis | ICD-10-CM |
| C44.691 | Other specified malignant neoplasm of skin of unspecified upper limb, including shoulder | Diagnosis | ICD-10-CM |
| C44.692 | Other specified malignant neoplasm of skin of right upper limb, including shoulder       | Diagnosis | ICD-10-CM |
| C44.699 | Other specified malignant neoplasm of skin of left upper limb, including shoulder        | Diagnosis | ICD-10-CM |
| C44.7   | Other and unspecified malignant neoplasm of skin of lower limb, including hip            | Diagnosis | ICD-10-CM |
| C44.70  | Unspecified malignant neoplasm of skin of lower limb, including hip                      | Diagnosis | ICD-10-CM |
| C44.701 | Unspecified malignant neoplasm of skin of unspecified lower limb, including hip          | Diagnosis | ICD-10-CM |
| C44.702 | Unspecified malignant neoplasm of skin of right lower limb, including hip                | Diagnosis | ICD-10-CM |
| C44.709 | Unspecified malignant neoplasm of skin of left lower limb, including hip                 | Diagnosis | ICD-10-CM |
| C44.79  | Other specified malignant neoplasm of skin of lower limb, including hip                  | Diagnosis | ICD-10-CM |
| C44.791 | Other specified malignant neoplasm of skin of unspecified lower limb, including hip      | Diagnosis | ICD-10-CM |
| C44.792 | Other specified malignant neoplasm of skin of right lower limb, including hip            | Diagnosis | ICD-10-CM |
| C44.799 | Other specified malignant neoplasm of skin of left lower limb, including hip             | Diagnosis | ICD-10-CM |
| C44.8   | Other and unspecified malignant neoplasm of overlapping sites of skin                    | Diagnosis | ICD-10-CM |
| C44.80  | Unspecified malignant neoplasm of overlapping sites of skin                              | Diagnosis | ICD-10-CM |
| C44.89  | Other specified malignant neoplasm of overlapping sites of skin                          | Diagnosis | ICD-10-CM |
| C44.9   | Other and unspecified malignant neoplasm of skin, unspecified                            | Diagnosis | ICD-10-CM |
| C44.90  | Unspecified malignant neoplasm of skin, unspecified                                      | Diagnosis | ICD-10-CM |
| C44.99  | Other specified malignant neoplasm of skin, unspecified                                  | Diagnosis | ICD-10-CM |
| C45     | Mesothelioma                                                                             | Diagnosis | ICD-10-CM |
| C46     | Kaposi's sarcoma                                                                         | Diagnosis | ICD-10-CM |
| C46.5   | Kaposi's sarcoma of lung                                                                 | Diagnosis | ICD-10-CM |
| C47     | Malignant neoplasm of peripheral nerves and autonomic nervous system                     | Diagnosis | ICD-10-CM |
| C47.1   | Malignant neoplasm of peripheral nerves of upper limb, including shoulder                | Diagnosis | ICD-10-CM |
| C47.2   | Malignant neoplasm of peripheral nerves of lower limb, including hip                     | Diagnosis | ICD-10-CM |
| C48     | Malignant neoplasm of retroperitoneum and peritoneum                                     | Diagnosis | ICD-10-CM |
| C49     | Malignant neoplasm of other connective and soft tissue                                   | Diagnosis | ICD-10-CM |
| C49.1   | Malignant neoplasm of connective and soft tissue of upper limb, including shoulder       | Diagnosis | ICD-10-CM |
| C49.2   | Malignant neoplasm of connective and soft tissue of lower limb, including hip            | Diagnosis | ICD-10-CM |
| C49.A   | Gastrointestinal stromal tumor                                                           | Diagnosis | ICD-10-CM |
| C4A     | Merkel cell carcinoma                                                                    | Diagnosis | ICD-10-CM |

| <b>Code</b> | <b>Description</b>                                                    | <b>Code Category</b> | <b>Code Type</b> |
|-------------|-----------------------------------------------------------------------|----------------------|------------------|
| C4A.0       | Merkel cell carcinoma of lip                                          | Diagnosis            | ICD-10-CM        |
| C4A.1       | Merkel cell carcinoma of eyelid, including canthus                    | Diagnosis            | ICD-10-CM        |
| C4A.10      | Merkel cell carcinoma of unspecified eyelid, including canthus        | Diagnosis            | ICD-10-CM        |
| C4A.11      | Merkel cell carcinoma of right eyelid, including canthus              | Diagnosis            | ICD-10-CM        |
| C4A.111     | Merkel cell carcinoma of right upper eyelid, including canthus        | Diagnosis            | ICD-10-CM        |
| C4A.112     | Merkel cell carcinoma of right lower eyelid, including canthus        | Diagnosis            | ICD-10-CM        |
| C4A.12      | Merkel cell carcinoma of left eyelid, including canthus               | Diagnosis            | ICD-10-CM        |
| C4A.121     | Merkel cell carcinoma of left upper eyelid, including canthus         | Diagnosis            | ICD-10-CM        |
| C4A.122     | Merkel cell carcinoma of left lower eyelid, including canthus         | Diagnosis            | ICD-10-CM        |
| C4A.2       | Merkel cell carcinoma of ear and external auricular canal             | Diagnosis            | ICD-10-CM        |
| C4A.20      | Merkel cell carcinoma of unspecified ear and external auricular canal | Diagnosis            | ICD-10-CM        |
| C4A.21      | Merkel cell carcinoma of right ear and external auricular canal       | Diagnosis            | ICD-10-CM        |
| C4A.22      | Merkel cell carcinoma of left ear and external auricular canal        | Diagnosis            | ICD-10-CM        |
| C4A.3       | Merkel cell carcinoma of other and unspecified parts of face          | Diagnosis            | ICD-10-CM        |
| C4A.30      | Merkel cell carcinoma of unspecified part of face                     | Diagnosis            | ICD-10-CM        |
| C4A.31      | Merkel cell carcinoma of nose                                         | Diagnosis            | ICD-10-CM        |
| C4A.39      | Merkel cell carcinoma of other parts of face                          | Diagnosis            | ICD-10-CM        |
| C4A.4       | Merkel cell carcinoma of scalp and neck                               | Diagnosis            | ICD-10-CM        |
| C4A.5       | Merkel cell carcinoma of trunk                                        | Diagnosis            | ICD-10-CM        |
| C4A.51      | Merkel cell carcinoma of anal skin                                    | Diagnosis            | ICD-10-CM        |
| C4A.52      | Merkel cell carcinoma of skin of breast                               | Diagnosis            | ICD-10-CM        |
| C4A.59      | Merkel cell carcinoma of other part of trunk                          | Diagnosis            | ICD-10-CM        |
| C4A.6       | Merkel cell carcinoma of upper limb, including shoulder               | Diagnosis            | ICD-10-CM        |
| C4A.60      | Merkel cell carcinoma of unspecified upper limb, including shoulder   | Diagnosis            | ICD-10-CM        |
| C4A.61      | Merkel cell carcinoma of right upper limb, including shoulder         | Diagnosis            | ICD-10-CM        |
| C4A.62      | Merkel cell carcinoma of left upper limb, including shoulder          | Diagnosis            | ICD-10-CM        |
| C4A.7       | Merkel cell carcinoma of lower limb, including hip                    | Diagnosis            | ICD-10-CM        |
| C4A.70      | Merkel cell carcinoma of unspecified lower limb, including hip        | Diagnosis            | ICD-10-CM        |
| C4A.71      | Merkel cell carcinoma of right lower limb, including hip              | Diagnosis            | ICD-10-CM        |
| C4A.72      | Merkel cell carcinoma of left lower limb, including hip               | Diagnosis            | ICD-10-CM        |
| C4A.8       | Merkel cell carcinoma of overlapping sites                            | Diagnosis            | ICD-10-CM        |
| C4A.9       | Merkel cell carcinoma, unspecified                                    | Diagnosis            | ICD-10-CM        |
| C50         | Malignant neoplasm of breast                                          | Diagnosis            | ICD-10-CM        |
| C50.0       | Malignant neoplasm of nipple and areola                               | Diagnosis            | ICD-10-CM        |
| C50.01      | Malignant neoplasm of nipple and areola, female                       | Diagnosis            | ICD-10-CM        |
| C50.02      | Malignant neoplasm of nipple and areola, male                         | Diagnosis            | ICD-10-CM        |
| C50.1       | Malignant neoplasm of central portion of breast                       | Diagnosis            | ICD-10-CM        |
| C50.11      | Malignant neoplasm of central portion of breast, female               | Diagnosis            | ICD-10-CM        |
| C50.12      | Malignant neoplasm of central portion of breast, male                 | Diagnosis            | ICD-10-CM        |
| C50.2       | Malignant neoplasm of upper-inner quadrant of breast                  | Diagnosis            | ICD-10-CM        |
| C50.21      | Malignant neoplasm of upper-inner quadrant of breast, female          | Diagnosis            | ICD-10-CM        |
| C50.22      | Malignant neoplasm of upper-inner quadrant of breast, male            | Diagnosis            | ICD-10-CM        |
| C50.3       | Malignant neoplasm of lower-inner quadrant of breast                  | Diagnosis            | ICD-10-CM        |
| C50.31      | Malignant neoplasm of lower-inner quadrant of breast, female          | Diagnosis            | ICD-10-CM        |
| C50.32      | Malignant neoplasm of lower-inner quadrant of breast, male            | Diagnosis            | ICD-10-CM        |

| <b>Code</b> | <b>Description</b>                                                         | <b>Code</b><br><b>Category</b> | <b>Code Type</b> |
|-------------|----------------------------------------------------------------------------|--------------------------------|------------------|
| C50.4       | Malignant neoplasm of upper-outer quadrant of breast                       | Diagnosis                      | ICD-10-CM        |
| C50.41      | Malignant neoplasm of upper-outer quadrant of breast, female               | Diagnosis                      | ICD-10-CM        |
| C50.42      | Malignant neoplasm of upper-outer quadrant of breast, male                 | Diagnosis                      | ICD-10-CM        |
| C50.5       | Malignant neoplasm of lower-outer quadrant of breast                       | Diagnosis                      | ICD-10-CM        |
| C50.51      | Malignant neoplasm of lower-outer quadrant of breast, female               | Diagnosis                      | ICD-10-CM        |
| C50.52      | Malignant neoplasm of lower-outer quadrant of breast, male                 | Diagnosis                      | ICD-10-CM        |
| C50.6       | Malignant neoplasm of axillary tail of breast                              | Diagnosis                      | ICD-10-CM        |
| C50.61      | Malignant neoplasm of axillary tail of breast, female                      | Diagnosis                      | ICD-10-CM        |
| C50.62      | Malignant neoplasm of axillary tail of breast, male                        | Diagnosis                      | ICD-10-CM        |
| C50.8       | Malignant neoplasm of overlapping sites of breast                          | Diagnosis                      | ICD-10-CM        |
| C50.81      | Malignant neoplasm of overlapping sites of breast, female                  | Diagnosis                      | ICD-10-CM        |
| C50.82      | Malignant neoplasm of overlapping sites of breast, male                    | Diagnosis                      | ICD-10-CM        |
| C50.9       | Malignant neoplasm of breast of unspecified site                           | Diagnosis                      | ICD-10-CM        |
| C50.91      | Malignant neoplasm of breast of unspecified site, female                   | Diagnosis                      | ICD-10-CM        |
| C50.92      | Malignant neoplasm of breast of unspecified site, male                     | Diagnosis                      | ICD-10-CM        |
| C51         | Malignant neoplasm of vulva                                                | Diagnosis                      | ICD-10-CM        |
| C53         | Malignant neoplasm of cervix uteri                                         | Diagnosis                      | ICD-10-CM        |
| C54         | Malignant neoplasm of corpus uteri                                         | Diagnosis                      | ICD-10-CM        |
| C56         | Malignant neoplasm of ovary                                                | Diagnosis                      | ICD-10-CM        |
| C57         | Malignant neoplasm of other and unspecified female genital organs          | Diagnosis                      | ICD-10-CM        |
| C57.0       | Malignant neoplasm of fallopian tube                                       | Diagnosis                      | ICD-10-CM        |
| C57.1       | Malignant neoplasm of broad ligament                                       | Diagnosis                      | ICD-10-CM        |
| C57.2       | Malignant neoplasm of round ligament                                       | Diagnosis                      | ICD-10-CM        |
| C60         | Malignant neoplasm of penis                                                | Diagnosis                      | ICD-10-CM        |
| C62         | Malignant neoplasm of testis                                               | Diagnosis                      | ICD-10-CM        |
| C62.0       | Malignant neoplasm of undescended testis                                   | Diagnosis                      | ICD-10-CM        |
| C62.1       | Malignant neoplasm of descended testis                                     | Diagnosis                      | ICD-10-CM        |
| C62.9       | Malignant neoplasm of testis, unspecified whether descended or undescended | Diagnosis                      | ICD-10-CM        |
| C63         | Malignant neoplasm of other and unspecified male genital organs            | Diagnosis                      | ICD-10-CM        |
| C63.0       | Malignant neoplasm of epididymis                                           | Diagnosis                      | ICD-10-CM        |
| C63.1       | Malignant neoplasm of spermatic cord                                       | Diagnosis                      | ICD-10-CM        |
| C64         | Malignant neoplasm of kidney, except renal pelvis                          | Diagnosis                      | ICD-10-CM        |
| C65         | Malignant neoplasm of renal pelvis                                         | Diagnosis                      | ICD-10-CM        |
| C66         | Malignant neoplasm of ureter                                               | Diagnosis                      | ICD-10-CM        |
| C67         | Malignant neoplasm of bladder                                              | Diagnosis                      | ICD-10-CM        |
| C68         | Malignant neoplasm of other and unspecified urinary organs                 | Diagnosis                      | ICD-10-CM        |
| C69         | Malignant neoplasm of eye and adnexa                                       | Diagnosis                      | ICD-10-CM        |
| C69.0       | Malignant neoplasm of conjunctiva                                          | Diagnosis                      | ICD-10-CM        |
| C69.1       | Malignant neoplasm of cornea                                               | Diagnosis                      | ICD-10-CM        |
| C69.2       | Malignant neoplasm of retina                                               | Diagnosis                      | ICD-10-CM        |
| C69.3       | Malignant neoplasm of choroid                                              | Diagnosis                      | ICD-10-CM        |
| C69.4       | Malignant neoplasm of ciliary body                                         | Diagnosis                      | ICD-10-CM        |
| C69.5       | Malignant neoplasm of lacrimal gland and duct                              | Diagnosis                      | ICD-10-CM        |
| C69.6       | Malignant neoplasm of orbit                                                | Diagnosis                      | ICD-10-CM        |
| C69.8       | Malignant neoplasm of overlapping sites of eye and adnexa                  | Diagnosis                      | ICD-10-CM        |

| <b>Code</b> | <b>Description</b>                                                                          | <b>Code Category</b> | <b>Code Type</b> |
|-------------|---------------------------------------------------------------------------------------------|----------------------|------------------|
| C69.9       | Malignant neoplasm of unspecified site of eye                                               | Diagnosis            | ICD-10-CM        |
| C70         | Malignant neoplasm of meninges                                                              | Diagnosis            | ICD-10-CM        |
| C71         | Malignant neoplasm of brain                                                                 | Diagnosis            | ICD-10-CM        |
| C72         | Malignant neoplasm of spinal cord, cranial nerves and other parts of central nervous system | Diagnosis            | ICD-10-CM        |
| C72.2       | Malignant neoplasm of olfactory nerve                                                       | Diagnosis            | ICD-10-CM        |
| C72.3       | Malignant neoplasm of optic nerve                                                           | Diagnosis            | ICD-10-CM        |
| C72.4       | Malignant neoplasm of acoustic nerve                                                        | Diagnosis            | ICD-10-CM        |
| C72.5       | Malignant neoplasm of other and unspecified cranial nerves                                  | Diagnosis            | ICD-10-CM        |
| C74         | Malignant neoplasm of adrenal gland                                                         | Diagnosis            | ICD-10-CM        |
| C74.0       | Malignant neoplasm of cortex of adrenal gland                                               | Diagnosis            | ICD-10-CM        |
| C74.1       | Malignant neoplasm of medulla of adrenal gland                                              | Diagnosis            | ICD-10-CM        |
| C74.9       | Malignant neoplasm of unspecified part of adrenal gland                                     | Diagnosis            | ICD-10-CM        |
| C75         | Malignant neoplasm of other endocrine glands and related structures                         | Diagnosis            | ICD-10-CM        |
| C76         | Malignant neoplasm of other and ill-defined sites                                           | Diagnosis            | ICD-10-CM        |
| C76.4       | Malignant neoplasm of upper limb                                                            | Diagnosis            | ICD-10-CM        |
| C76.5       | Malignant neoplasm of lower limb                                                            | Diagnosis            | ICD-10-CM        |
| C77         | Secondary and unspecified malignant neoplasm of lymph nodes                                 | Diagnosis            | ICD-10-CM        |
| C78         | Secondary malignant neoplasm of respiratory and digestive organs                            | Diagnosis            | ICD-10-CM        |
| C78.0       | Secondary malignant neoplasm of lung                                                        | Diagnosis            | ICD-10-CM        |
| C78.3       | Secondary malignant neoplasm of other and unspecified respiratory organs                    | Diagnosis            | ICD-10-CM        |
| C78.8       | Secondary malignant neoplasm of other and unspecified digestive organs                      | Diagnosis            | ICD-10-CM        |
| C79         | Secondary malignant neoplasm of other and unspecified sites                                 | Diagnosis            | ICD-10-CM        |
| C79.0       | Secondary malignant neoplasm of kidney and renal pelvis                                     | Diagnosis            | ICD-10-CM        |
| C79.1       | Secondary malignant neoplasm of bladder and other and unspecified urinary organs            | Diagnosis            | ICD-10-CM        |
| C79.3       | Secondary malignant neoplasm of brain and cerebral meninges                                 | Diagnosis            | ICD-10-CM        |
| C79.4       | Secondary malignant neoplasm of other and unspecified parts of nervous system               | Diagnosis            | ICD-10-CM        |
| C79.5       | Secondary malignant neoplasm of bone and bone marrow                                        | Diagnosis            | ICD-10-CM        |
| C79.6       | Secondary malignant neoplasm of ovary                                                       | Diagnosis            | ICD-10-CM        |
| C79.7       | Secondary malignant neoplasm of adrenal gland                                               | Diagnosis            | ICD-10-CM        |
| C79.8       | Secondary malignant neoplasm of other specified sites                                       | Diagnosis            | ICD-10-CM        |
| C7A         | Malignant neuroendocrine tumors                                                             | Diagnosis            | ICD-10-CM        |
| C7A.0       | Malignant carcinoid tumors                                                                  | Diagnosis            | ICD-10-CM        |
| C7A.00      | Malignant carcinoid tumor of unspecified site                                               | Diagnosis            | ICD-10-CM        |
| C7A.01      | Malignant carcinoid tumors of the small intestine                                           | Diagnosis            | ICD-10-CM        |
| C7A.010     | Malignant carcinoid tumor of the duodenum                                                   | Diagnosis            | ICD-10-CM        |
| C7A.011     | Malignant carcinoid tumor of the jejunum                                                    | Diagnosis            | ICD-10-CM        |
| C7A.012     | Malignant carcinoid tumor of the ileum                                                      | Diagnosis            | ICD-10-CM        |
| C7A.019     | Malignant carcinoid tumor of the small intestine, unspecified portion                       | Diagnosis            | ICD-10-CM        |
| C7A.02      | Malignant carcinoid tumors of the appendix, large intestine, and rectum                     | Diagnosis            | ICD-10-CM        |
| C7A.020     | Malignant carcinoid tumor of the appendix                                                   | Diagnosis            | ICD-10-CM        |
| C7A.021     | Malignant carcinoid tumor of the cecum                                                      | Diagnosis            | ICD-10-CM        |
| C7A.022     | Malignant carcinoid tumor of the ascending colon                                            | Diagnosis            | ICD-10-CM        |
| C7A.023     | Malignant carcinoid tumor of the transverse colon                                           | Diagnosis            | ICD-10-CM        |



| <b>Code</b> | <b>Description</b>                                                    | <b>Code Category</b> | <b>Code Type</b> |
|-------------|-----------------------------------------------------------------------|----------------------|------------------|
| C7A.024     | Malignant carcinoid tumor of the descending colon                     | Diagnosis            | ICD-10-CM        |
| C7A.025     | Malignant carcinoid tumor of the sigmoid colon                        | Diagnosis            | ICD-10-CM        |
| C7A.026     | Malignant carcinoid tumor of the rectum                               | Diagnosis            | ICD-10-CM        |
| C7A.029     | Malignant carcinoid tumor of the large intestine, unspecified portion | Diagnosis            | ICD-10-CM        |
| C7A.09      | Malignant carcinoid tumors of other sites                             | Diagnosis            | ICD-10-CM        |
| C7A.090     | Malignant carcinoid tumor of the bronchus and lung                    | Diagnosis            | ICD-10-CM        |
| C7A.091     | Malignant carcinoid tumor of the thymus                               | Diagnosis            | ICD-10-CM        |
| C7A.092     | Malignant carcinoid tumor of the stomach                              | Diagnosis            | ICD-10-CM        |
| C7A.093     | Malignant carcinoid tumor of the kidney                               | Diagnosis            | ICD-10-CM        |
| C7A.094     | Malignant carcinoid tumor of the foregut, unspecified                 | Diagnosis            | ICD-10-CM        |
| C7A.095     | Malignant carcinoid tumor of the midgut, unspecified                  | Diagnosis            | ICD-10-CM        |
| C7A.096     | Malignant carcinoid tumor of the hindgut, unspecified                 | Diagnosis            | ICD-10-CM        |
| C7A.098     | Malignant carcinoid tumors of other sites                             | Diagnosis            | ICD-10-CM        |
| C7A.1       | Malignant poorly differentiated neuroendocrine tumors                 | Diagnosis            | ICD-10-CM        |
| C7A.8       | Other malignant neuroendocrine tumors                                 | Diagnosis            | ICD-10-CM        |
| C7B         | Secondary neuroendocrine tumors                                       | Diagnosis            | ICD-10-CM        |
| C7B.0       | Secondary carcinoid tumors                                            | Diagnosis            | ICD-10-CM        |
| C7B.00      | Secondary carcinoid tumors, unspecified site                          | Diagnosis            | ICD-10-CM        |
| C7B.01      | Secondary carcinoid tumors of distant lymph nodes                     | Diagnosis            | ICD-10-CM        |
| C7B.02      | Secondary carcinoid tumors of liver                                   | Diagnosis            | ICD-10-CM        |
| C7B.03      | Secondary carcinoid tumors of bone                                    | Diagnosis            | ICD-10-CM        |
| C7B.04      | Secondary carcinoid tumors of peritoneum                              | Diagnosis            | ICD-10-CM        |
| C7B.09      | Secondary carcinoid tumors of other sites                             | Diagnosis            | ICD-10-CM        |
| C7B.1       | Secondary Merkel cell carcinoma                                       | Diagnosis            | ICD-10-CM        |
| C7B.8       | Other secondary neuroendocrine tumors                                 | Diagnosis            | ICD-10-CM        |
| C80         | Malignant neoplasm without specification of site                      | Diagnosis            | ICD-10-CM        |
| C81         | Hodgkin lymphoma                                                      | Diagnosis            | ICD-10-CM        |
| C81.0       | Nodular lymphocyte predominant Hodgkin lymphoma                       | Diagnosis            | ICD-10-CM        |
| C81.1       | Nodular sclerosis Hodgkin lymphoma                                    | Diagnosis            | ICD-10-CM        |
| C81.2       | Mixed cellularity Hodgkin lymphoma                                    | Diagnosis            | ICD-10-CM        |
| C81.3       | Lymphocyte depleted Hodgkin lymphoma                                  | Diagnosis            | ICD-10-CM        |
| C81.4       | Lymphocyte-rich Hodgkin lymphoma                                      | Diagnosis            | ICD-10-CM        |
| C81.7       | Other Hodgkin lymphoma                                                | Diagnosis            | ICD-10-CM        |
| C81.9       | Hodgkin lymphoma, unspecified                                         | Diagnosis            | ICD-10-CM        |
| C82         | Follicular lymphoma                                                   | Diagnosis            | ICD-10-CM        |
| C82.0       | Follicular lymphoma grade I                                           | Diagnosis            | ICD-10-CM        |
| C82.1       | Follicular lymphoma grade II                                          | Diagnosis            | ICD-10-CM        |
| C82.2       | Follicular lymphoma grade III, unspecified                            | Diagnosis            | ICD-10-CM        |
| C82.3       | Follicular lymphoma grade IIIa                                        | Diagnosis            | ICD-10-CM        |
| C82.4       | Follicular lymphoma grade IIIb                                        | Diagnosis            | ICD-10-CM        |
| C82.5       | Diffuse follicle center lymphoma                                      | Diagnosis            | ICD-10-CM        |
| C82.6       | Cutaneous follicle center lymphoma                                    | Diagnosis            | ICD-10-CM        |
| C82.8       | Other types of follicular lymphoma                                    | Diagnosis            | ICD-10-CM        |
| C82.9       | Follicular lymphoma, unspecified                                      | Diagnosis            | ICD-10-CM        |
| C83         | Non-follicular lymphoma                                               | Diagnosis            | ICD-10-CM        |

| Code  | Description                                                               | Code      |           |
|-------|---------------------------------------------------------------------------|-----------|-----------|
|       |                                                                           | Category  | Code Type |
| C83.0 | Small cell B-cell lymphoma                                                | Diagnosis | ICD-10-CM |
| C83.1 | Mantle cell lymphoma                                                      | Diagnosis | ICD-10-CM |
| C83.3 | Diffuse large B-cell lymphoma                                             | Diagnosis | ICD-10-CM |
| C83.5 | Lymphoblastic (diffuse) lymphoma                                          | Diagnosis | ICD-10-CM |
| C83.7 | Burkitt lymphoma                                                          | Diagnosis | ICD-10-CM |
| C83.8 | Other non-follicular lymphoma                                             | Diagnosis | ICD-10-CM |
| C83.9 | Non-follicular (diffuse) lymphoma, unspecified                            | Diagnosis | ICD-10-CM |
| C84   | Mature T/NK-cell lymphomas                                                | Diagnosis | ICD-10-CM |
| C84.0 | Mycosis fungoides                                                         | Diagnosis | ICD-10-CM |
| C84.1 | Sezary disease                                                            | Diagnosis | ICD-10-CM |
| C84.4 | Peripheral T-cell lymphoma, not classified                                | Diagnosis | ICD-10-CM |
| C84.6 | Anaplastic large cell lymphoma, ALK-positive                              | Diagnosis | ICD-10-CM |
| C84.7 | Anaplastic large cell lymphoma, ALK-negative                              | Diagnosis | ICD-10-CM |
| C84.9 | Mature T/NK-cell lymphomas, unspecified                                   | Diagnosis | ICD-10-CM |
| C84.A | Cutaneous T-cell lymphoma, unspecified                                    | Diagnosis | ICD-10-CM |
| C84.Z | Other mature T/NK-cell lymphomas                                          | Diagnosis | ICD-10-CM |
| C85   | Other specified and unspecified types of non-Hodgkin lymphoma             | Diagnosis | ICD-10-CM |
| C85.1 | Unspecified B-cell lymphoma                                               | Diagnosis | ICD-10-CM |
| C85.2 | Mediastinal (thymic) large B-cell lymphoma                                | Diagnosis | ICD-10-CM |
| C85.8 | Other specified types of non-Hodgkin lymphoma                             | Diagnosis | ICD-10-CM |
| C85.9 | Non-Hodgkin lymphoma, unspecified                                         | Diagnosis | ICD-10-CM |
| C86   | Other specified types of T/NK-cell lymphoma                               | Diagnosis | ICD-10-CM |
| C88   | Malignant immunoproliferative diseases and certain other B-cell lymphomas | Diagnosis | ICD-10-CM |
| C88.0 | Waldenstrom macroglobulinemia                                             | Diagnosis | ICD-10-CM |
| C90   | Multiple myeloma and malignant plasma cell neoplasms                      | Diagnosis | ICD-10-CM |
| C90.0 | Multiple myeloma                                                          | Diagnosis | ICD-10-CM |
| C90.1 | Plasma cell leukemia                                                      | Diagnosis | ICD-10-CM |
| C90.2 | Extramedullary plasmacytoma                                               | Diagnosis | ICD-10-CM |
| C90.3 | Solitary plasmacytoma                                                     | Diagnosis | ICD-10-CM |
| C91   | Lymphoid leukemia                                                         | Diagnosis | ICD-10-CM |
| C91.0 | Acute lymphoblastic leukemia [ALL]                                        | Diagnosis | ICD-10-CM |
| C91.1 | Chronic lymphocytic leukemia of B-cell type                               | Diagnosis | ICD-10-CM |
| C91.3 | Prolymphocytic leukemia of B-cell type                                    | Diagnosis | ICD-10-CM |
| C91.4 | Hairy cell leukemia                                                       | Diagnosis | ICD-10-CM |
| C91.5 | Adult T-cell lymphoma/leukemia (HTLV-1-associated)                        | Diagnosis | ICD-10-CM |
| C91.6 | Prolymphocytic leukemia of T-cell type                                    | Diagnosis | ICD-10-CM |
| C91.9 | Lymphoid leukemia, unspecified                                            | Diagnosis | ICD-10-CM |
| C91.A | Mature B-cell leukemia Burkitt-type                                       | Diagnosis | ICD-10-CM |
| C91.Z | Other lymphoid leukemia                                                   | Diagnosis | ICD-10-CM |
| C92   | Myeloid leukemia                                                          | Diagnosis | ICD-10-CM |
| C92.0 | Acute myeloblastic leukemia                                               | Diagnosis | ICD-10-CM |
| C92.1 | Chronic myeloid leukemia, BCR/ABL-positive                                | Diagnosis | ICD-10-CM |
| C92.2 | Atypical chronic myeloid leukemia, BCR/ABL-negative                       | Diagnosis | ICD-10-CM |
| C92.3 | Myeloid sarcoma                                                           | Diagnosis | ICD-10-CM |
| C92.4 | Acute promyelocytic leukemia                                              | Diagnosis | ICD-10-CM |

| Code    | Description                                                                                                                                                                                           | Code      |            |
|---------|-------------------------------------------------------------------------------------------------------------------------------------------------------------------------------------------------------|-----------|------------|
|         |                                                                                                                                                                                                       | Category  | Code Type  |
| C92.5   | Acute myelomonocytic leukemia                                                                                                                                                                         | Diagnosis | ICD-10-CM  |
| C92.6   | Acute myeloid leukemia with 11q23-abnormality                                                                                                                                                         | Diagnosis | ICD-10-CM  |
| C92.9   | Myeloid leukemia, unspecified                                                                                                                                                                         | Diagnosis | ICD-10-CM  |
| C92.A   | Acute myeloid leukemia with multilineage dysplasia                                                                                                                                                    | Diagnosis | ICD-10-CM  |
| C92.Z   | Other myeloid leukemia                                                                                                                                                                                | Diagnosis | ICD-10-CM  |
| C93     | Monocytic leukemia                                                                                                                                                                                    | Diagnosis | ICD-10-CM  |
| C93.0   | Acute monoblastic/monocytic leukemia                                                                                                                                                                  | Diagnosis | ICD-10-CM  |
| C93.1   | Chronic myelomonocytic leukemia                                                                                                                                                                       | Diagnosis | ICD-10-CM  |
| C93.3   | Juvenile myelomonocytic leukemia                                                                                                                                                                      | Diagnosis | ICD-10-CM  |
| C93.9   | Monocytic leukemia, unspecified                                                                                                                                                                       | Diagnosis | ICD-10-CM  |
| C93.Z   | Other monocytic leukemia                                                                                                                                                                              | Diagnosis | ICD-10-CM  |
| C94     | Other leukemias of specified cell type                                                                                                                                                                | Diagnosis | ICD-10-CM  |
| C94.0   | Acute erythroid leukemia                                                                                                                                                                              | Diagnosis | ICD-10-CM  |
| C94.2   | Acute megakaryoblastic leukemia                                                                                                                                                                       | Diagnosis | ICD-10-CM  |
| C94.3   | Mast cell leukemia                                                                                                                                                                                    | Diagnosis | ICD-10-CM  |
| C94.4   | Acute panmyelosis with myelofibrosis                                                                                                                                                                  | Diagnosis | ICD-10-CM  |
| C94.40  | Acute panmyelosis with myelofibrosis not having achieved remission                                                                                                                                    | Diagnosis | ICD-10-CM  |
| C94.41  | Acute panmyelosis with myelofibrosis, in remission                                                                                                                                                    | Diagnosis | ICD-10-CM  |
| C94.42  | Acute panmyelosis with myelofibrosis, in relapse                                                                                                                                                      | Diagnosis | ICD-10-CM  |
| C94.6   | Myelodysplastic disease, not classified                                                                                                                                                               | Diagnosis | ICD-10-CM  |
| C94.8   | Other specified leukemias                                                                                                                                                                             | Diagnosis | ICD-10-CM  |
| C95     | Leukemia of unspecified cell type                                                                                                                                                                     | Diagnosis | ICD-10-CM  |
| C95.0   | Acute leukemia of unspecified cell type                                                                                                                                                               | Diagnosis | ICD-10-CM  |
| C95.1   | Chronic leukemia of unspecified cell type                                                                                                                                                             | Diagnosis | ICD-10-CM  |
| C95.9   | Leukemia, unspecified                                                                                                                                                                                 | Diagnosis | ICD-10-CM  |
| C96     | Other and unspecified malignant neoplasms of lymphoid, hematopoietic and related tissue                                                                                                               | Diagnosis | ICD-10-CM  |
| C96.2   | Malignant mast cell neoplasm                                                                                                                                                                          | Diagnosis | ICD-10-CM  |
| C96.5   | Multifocal and unisystemic Langerhans-cell histiocytosis                                                                                                                                              | Diagnosis | ICD-10-CM  |
| C96.6   | Unifocal Langerhans-cell histiocytosis                                                                                                                                                                | Diagnosis | ICD-10-CM  |
| 3E0600P | Introduction of Clofarabine into Central Artery, Open Approach                                                                                                                                        | Procedure | ICD-10-PCS |
| 3E0630P | Introduction of Clofarabine into Central Artery, Percutaneous Approach                                                                                                                                | Procedure | ICD-10-PCS |
| 3E0400P | Introduction of Clofarabine into Central Vein, Open Approach                                                                                                                                          | Procedure | ICD-10-PCS |
| 3E0430P | Introduction of Clofarabine into Central Vein, Percutaneous Approach                                                                                                                                  | Procedure | ICD-10-PCS |
| 3E0500P | Introduction of Clofarabine into Peripheral Artery, Open Approach                                                                                                                                     | Procedure | ICD-10-PCS |
| 3E0530P | Introduction of Clofarabine into Peripheral Artery, Percutaneous Approach                                                                                                                             | Procedure | ICD-10-PCS |
| 3E0300P | Introduction of Clofarabine into Peripheral Vein, Open Approach                                                                                                                                       | Procedure | ICD-10-PCS |
| 3E0330P | Introduction of Clofarabine into Peripheral Vein, Percutaneous Approach                                                                                                                               | Procedure | ICD-10-PCS |
| 96415   | Chemotherapy administration, intravenous infusion technique; each additional hour (List separately in addition to code for primary procedure)                                                         | Procedure | CPT-4      |
| 96417   | Chemotherapy administration, intravenous infusion technique; each additional sequential infusion (different substance/drug), up to 1 hour (List separately in addition to code for primary procedure) | Procedure | CPT-4      |

| Code  | Description                                                                                                                                                                                                                                                                                                                                                                                          | Code      |           |
|-------|------------------------------------------------------------------------------------------------------------------------------------------------------------------------------------------------------------------------------------------------------------------------------------------------------------------------------------------------------------------------------------------------------|-----------|-----------|
|       |                                                                                                                                                                                                                                                                                                                                                                                                      | Category  | Code Type |
| 96416 | Chemotherapy administration, intravenous infusion technique; initiation of prolonged chemotherapy infusion (more than 8 hours), requiring use of a portable or implantable pump                                                                                                                                                                                                                      | Procedure | CPT-4     |
| 96413 | Chemotherapy administration, intravenous infusion technique; up to 1 hour, single or initial substance/drug                                                                                                                                                                                                                                                                                          | Procedure | CPT-4     |
| 96414 | Chemotherapy administration, intravenous; infusion technique, initiation of prolonged infusion (more than 8 hours), requiring the use of a portable or implantable pump                                                                                                                                                                                                                              | Procedure | CPT-4     |
| 96412 | Chemotherapy administration, intravenous; infusion technique, one to 8 hours, each additional hour (List separately in addition to code for primary procedure)                                                                                                                                                                                                                                       | Procedure | CPT-4     |
| 96410 | Chemotherapy administration, intravenous; infusion technique, up to one hour                                                                                                                                                                                                                                                                                                                         | Procedure | CPT-4     |
| 96408 | Chemotherapy administration, intravenous; push technique                                                                                                                                                                                                                                                                                                                                             | Procedure | CPT-4     |
| 96411 | Chemotherapy administration; intravenous, push technique, each additional substance/drug (List separately in addition to code for primary procedure)                                                                                                                                                                                                                                                 | Procedure | CPT-4     |
| 96409 | Chemotherapy administration; intravenous, push technique, single or initial substance/drug                                                                                                                                                                                                                                                                                                           | Procedure | CPT-4     |
| 96508 | Chemotherapy Injection, Intravenous, Complex, Using One Or                                                                                                                                                                                                                                                                                                                                           | Procedure | CPT-4     |
| 96509 | Chemotherapy Injection, Intravenous, Complex, Using One Or                                                                                                                                                                                                                                                                                                                                           | Procedure | CPT-4     |
| 96510 | Chemotherapy Injection, Intravenous, Complex, Using One Or                                                                                                                                                                                                                                                                                                                                           | Procedure | CPT-4     |
| 96511 | Chemotherapy Injection, Intravenous, Complex, Using One Or                                                                                                                                                                                                                                                                                                                                           | Procedure | CPT-4     |
| 96512 | Chemotherapy Injection, Intravenous, Complex, Using One Or                                                                                                                                                                                                                                                                                                                                           | Procedure | CPT-4     |
| 96504 | Chemotherapy Injection, Intravenous, Multiple Premixed Agents,                                                                                                                                                                                                                                                                                                                                       | Procedure | CPT-4     |
| 96505 | Chemotherapy Injection, Intravenous, Multiple Premixed Agents,                                                                                                                                                                                                                                                                                                                                       | Procedure | CPT-4     |
| 96500 | Chemotherapy Injection, Intravenous, Single Premixed Agent,                                                                                                                                                                                                                                                                                                                                          | Procedure | CPT-4     |
| 96501 | Chemotherapy Injection, Intravenous, Single Premixed Agent,                                                                                                                                                                                                                                                                                                                                          | Procedure | CPT-4     |
| 99555 | Home infusion for chemotherapy, per visit                                                                                                                                                                                                                                                                                                                                                            | Procedure | CPT-4     |
| 79100 | Radiopharmaceutical therapy, polycythemia vera, chronic leukemia, each treatment by intravenous injection                                                                                                                                                                                                                                                                                            | Procedure | CPT-4     |
| G0498 | Chemotherapy administration, intravenous infusion technique; initiation of infusion in the office/clinic setting using office/clinic pump/supplies, with continuation of the infusion in the community setting (e.g., home, domiciliary, rest home or assisted living) using a portable pump provided by the office/clinic, includes follow up office/clinic visit at the conclusion of the infusion | Procedure | HCPCS     |
| G0359 | Chemotherapy administration, intravenous infusion technique; up to one hour, single or initial substance/drug                                                                                                                                                                                                                                                                                        | Procedure | HCPCS     |
| C8955 | Chemotherapy administration, intravenous; infusion technique, each additional hour (List separately in addition to C8954)                                                                                                                                                                                                                                                                            | Procedure | HCPCS     |
| C8954 | Chemotherapy administration, intravenous; infusion technique, up to one hour                                                                                                                                                                                                                                                                                                                         | Procedure | HCPCS     |
| C8953 | Chemotherapy administration, intravenous; push technique                                                                                                                                                                                                                                                                                                                                             | Procedure | HCPCS     |
| S9329 | Home infusion therapy, chemotherapy infusion; administrative services, professional pharmacy services, care coordination, and all necessary supplies and equipment (drugs and nursing visits coded separately), per diem (do not use this code with S9330 or S9331)                                                                                                                                  | Procedure | HCPCS     |

| Code  | Description                                                                                                                                                                                                                                                | Code      |           |
|-------|------------------------------------------------------------------------------------------------------------------------------------------------------------------------------------------------------------------------------------------------------------|-----------|-----------|
|       |                                                                                                                                                                                                                                                            | Category  | Code Type |
| S9330 | Home infusion therapy, continuous (24 hours or more) chemotherapy infusion; administrative services, professional pharmacy services, care coordination, and all necessary supplies and equipment (drugs and nursing visits coded separately), per diem     | Procedure | HCPCS     |
| S9331 | Home infusion therapy, intermittent (less than 24 hours) chemotherapy infusion; administrative services, professional pharmacy services, care coordination, and all necessary supplies and equipment (drugs and nursing visits coded separately), per diem | Procedure | HCPCS     |

### Viral Pneumonia

|        |                                                                |           |          |
|--------|----------------------------------------------------------------|-----------|----------|
| 480    | Viral pneumonia                                                | Diagnosis | ICD-9-CM |
| 480.0  | Pneumonia due to adenovirus                                    | Diagnosis | ICD-9-CM |
| 480.1  | Pneumonia due to respiratory syncytial virus                   | Diagnosis | ICD-9-CM |
| 480.2  | Pneumonia due to parainfluenza virus                           | Diagnosis | ICD-9-CM |
| 480.3  | Pneumonia due to SARS-associated coronavirus                   | Diagnosis | ICD-9-CM |
| 480.8  | Pneumonia due to other virus not elsewhere classified          | Diagnosis | ICD-9-CM |
| 480.9  | Unspecified viral pneumonia                                    | Diagnosis | ICD-9-CM |
| 481    | Pneumococcal pneumonia (streptococcus pneumoniae pneumonia)    | Diagnosis | ICD-9-CM |
| 482    | Other bacterial pneumonia                                      | Diagnosis | ICD-9-CM |
| 482.0  | Pneumonia due to Klebsiella pneumoniae                         | Diagnosis | ICD-9-CM |
| 482.1  | Pneumonia due to Pseudomonas                                   | Diagnosis | ICD-9-CM |
| 482.2  | Pneumonia due to Hemophilus influenzae (H. influenzae)         | Diagnosis | ICD-9-CM |
| 482.3  | Pneumonia due to Streptococcus                                 | Diagnosis | ICD-9-CM |
| 482.30 | Pneumonia due to unspecified Streptococcus                     | Diagnosis | ICD-9-CM |
| 482.31 | Pneumonia due to Streptococcus, group A                        | Diagnosis | ICD-9-CM |
| 482.32 | Pneumonia due to Streptococcus, group B                        | Diagnosis | ICD-9-CM |
| 482.39 | Pneumonia due to other Streptococcus                           | Diagnosis | ICD-9-CM |
| 482.4  | Pneumonia due to Staphylococcus                                | Diagnosis | ICD-9-CM |
| 482.40 | Pneumonia due to Staphylococcus, unspecified                   | Diagnosis | ICD-9-CM |
| 482.41 | Methicillin susceptible pneumonia due to Staphylococcus aureus | Diagnosis | ICD-9-CM |
| 482.42 | Methicillin resistant pneumonia due to Staphylococcus aureus   | Diagnosis | ICD-9-CM |
| 482.49 | Other Staphylococcus pneumonia                                 | Diagnosis | ICD-9-CM |
| 482.8  | Pneumonia due to other specified bacteria                      | Diagnosis | ICD-9-CM |
| 482.81 | Pneumonia due to anaerobes                                     | Diagnosis | ICD-9-CM |
| 482.82 | Pneumonia due to Escherichia coli (E. coli)                    | Diagnosis | ICD-9-CM |
| 482.83 | Pneumonia due to other gram-negative bacteria                  | Diagnosis | ICD-9-CM |
| 482.84 | Legionnaires' disease                                          | Diagnosis | ICD-9-CM |
| 482.89 | Pneumonia due to other specified bacteria                      | Diagnosis | ICD-9-CM |
| 482.9  | Unspecified bacterial pneumonia                                | Diagnosis | ICD-9-CM |
| 483    | Pneumonia due to other specified organism                      | Diagnosis | ICD-9-CM |
| 483.0  | Pneumonia due to Mycoplasma pneumoniae                         | Diagnosis | ICD-9-CM |
| 483.1  | Pneumonia due to Chlamydia                                     | Diagnosis | ICD-9-CM |
| 483.8  | Pneumonia due to other specified organism                      | Diagnosis | ICD-9-CM |
| 484    | Pneumonia in infectious diseases classified elsewhere          | Diagnosis | ICD-9-CM |
| 484.1  | Pneumonia in cytomegalic inclusion disease                     | Diagnosis | ICD-9-CM |
| 484.3  | Pneumonia in whooping cough                                    | Diagnosis | ICD-9-CM |

| <b>Code</b> | <b>Description</b>                                             | <b>Code</b>     | <b>Code Type</b> |
|-------------|----------------------------------------------------------------|-----------------|------------------|
|             |                                                                | <b>Category</b> |                  |
| 484.5       | Pneumonia in anthrax                                           | Diagnosis       | ICD-9-CM         |
| 484.6       | Pneumonia in aspergillosis                                     | Diagnosis       | ICD-9-CM         |
| 484.7       | Pneumonia in other systemic mycoses                            | Diagnosis       | ICD-9-CM         |
| 484.8       | Pneumonia in other infectious diseases classified elsewhere    | Diagnosis       | ICD-9-CM         |
| 485         | Bronchopneumonia, organism unspecified                         | Diagnosis       | ICD-9-CM         |
| 486         | Pneumonia, organism unspecified                                | Diagnosis       | ICD-9-CM         |
| 507         | Pneumonitis due to solids and liquids                          | Diagnosis       | ICD-9-CM         |
| 507.0       | Pneumonitis due to inhalation of food or vomitus               | Diagnosis       | ICD-9-CM         |
| 507.1       | Pneumonitis due to inhalation of oils and essences             | Diagnosis       | ICD-9-CM         |
| 507.8       | Pneumonitis due to other solids and liquids                    | Diagnosis       | ICD-9-CM         |
| 997.3       | Respiratory complications                                      | Diagnosis       | ICD-9-CM         |
| 997.31      | Ventilator associated pneumonia                                | Diagnosis       | ICD-9-CM         |
| 997.32      | Postprocedural aspiration pneumonia                            | Diagnosis       | ICD-9-CM         |
| 997.39      | Other respiratory complications                                | Diagnosis       | ICD-9-CM         |
| A22.1       | Pulmonary anthrax                                              | Diagnosis       | ICD-10-CM        |
| A37.01      | Whooping cough due to Bordetella pertussis with pneumonia      | Diagnosis       | ICD-10-CM        |
| A37.11      | Whooping cough due to Bordetella parapertussis with pneumonia  | Diagnosis       | ICD-10-CM        |
| A37.81      | Whooping cough due to other Bordetella species with pneumonia  | Diagnosis       | ICD-10-CM        |
| A37.91      | Whooping cough, unspecified species with pneumonia             | Diagnosis       | ICD-10-CM        |
| A48.1       | Legionnaires' disease                                          | Diagnosis       | ICD-10-CM        |
| B25.0       | Cytomegaloviral pneumonitis                                    | Diagnosis       | ICD-10-CM        |
| B44.0       | Invasive pulmonary aspergillosis                               | Diagnosis       | ICD-10-CM        |
| B77.81      | Ascariasis pneumonia                                           | Diagnosis       | ICD-10-CM        |
| J12.0       | Adenoviral pneumonia                                           | Diagnosis       | ICD-10-CM        |
| J12.1       | Respiratory syncytial virus pneumonia                          | Diagnosis       | ICD-10-CM        |
| J12.2       | Parainfluenza virus pneumonia                                  | Diagnosis       | ICD-10-CM        |
| J12.3       | Human metapneumovirus pneumonia                                | Diagnosis       | ICD-10-CM        |
| J12.81      | Pneumonia due to SARS-associated coronavirus                   | Diagnosis       | ICD-10-CM        |
| J12.89      | Other viral pneumonia                                          | Diagnosis       | ICD-10-CM        |
| J12.9       | Viral pneumonia, unspecified                                   | Diagnosis       | ICD-10-CM        |
| J13         | Pneumonia due to Streptococcus pneumoniae                      | Diagnosis       | ICD-10-CM        |
| J14         | Pneumonia due to Hemophilus influenzae                         | Diagnosis       | ICD-10-CM        |
| J15.0       | Pneumonia due to Klebsiella pneumoniae                         | Diagnosis       | ICD-10-CM        |
| J15.1       | Pneumonia due to Pseudomonas                                   | Diagnosis       | ICD-10-CM        |
| J15.20      | Pneumonia due to staphylococcus, unspecified                   | Diagnosis       | ICD-10-CM        |
| J15.211     | Pneumonia due to Methicillin susceptible Staphylococcus aureus | Diagnosis       | ICD-10-CM        |
| J15.212     | Pneumonia due to Methicillin resistant Staphylococcus aureus   | Diagnosis       | ICD-10-CM        |
| J15.29      | Pneumonia due to other staphylococcus                          | Diagnosis       | ICD-10-CM        |
| J15.3       | Pneumonia due to streptococcus, group B                        | Diagnosis       | ICD-10-CM        |
| J15.4       | Pneumonia due to other streptococci                            | Diagnosis       | ICD-10-CM        |
| J15.5       | Pneumonia due to Escherichia coli                              | Diagnosis       | ICD-10-CM        |
| J15.6       | Pneumonia due to other Gram-negative bacteria                  | Diagnosis       | ICD-10-CM        |
| J15.7       | Pneumonia due to Mycoplasma pneumoniae                         | Diagnosis       | ICD-10-CM        |
| J15.8       | Pneumonia due to other specified bacteria                      | Diagnosis       | ICD-10-CM        |
| J15.9       | Unspecified bacterial pneumonia                                | Diagnosis       | ICD-10-CM        |

| Code                                       | Description                                                                                                | Code      |           |
|--------------------------------------------|------------------------------------------------------------------------------------------------------------|-----------|-----------|
|                                            |                                                                                                            | Category  | Code Type |
| J16.0                                      | Chlamydial pneumonia                                                                                       | Diagnosis | ICD-10-CM |
| J16.8                                      | Pneumonia due to other specified infectious organisms                                                      | Diagnosis | ICD-10-CM |
| J17                                        | Pneumonia in diseases classified elsewhere                                                                 | Diagnosis | ICD-10-CM |
| J18.0                                      | Bronchopneumonia, unspecified organism                                                                     | Diagnosis | ICD-10-CM |
| J18.1                                      | Lobar pneumonia, unspecified organism                                                                      | Diagnosis | ICD-10-CM |
| J18.8                                      | Other pneumonia, unspecified organism                                                                      | Diagnosis | ICD-10-CM |
| J18.9                                      | Pneumonia, unspecified organism                                                                            | Diagnosis | ICD-10-CM |
| J69.0                                      | Pneumonitis due to inhalation of food and vomit                                                            | Diagnosis | ICD-10-CM |
| J69.1                                      | Pneumonitis due to inhalation of oils and essences                                                         | Diagnosis | ICD-10-CM |
| J69.8                                      | Pneumonitis due to inhalation of other solids and liquids                                                  | Diagnosis | ICD-10-CM |
| J95.4                                      | Chemical pneumonitis due to anesthesia                                                                     | Diagnosis | ICD-10-CM |
| J95.5                                      | Postprocedural subglottic stenosis                                                                         | Diagnosis | ICD-10-CM |
| J95.851                                    | Ventilator associated pneumonia                                                                            | Diagnosis | ICD-10-CM |
| J95.859                                    | Other complication of respirator [ventilator]                                                              | Diagnosis | ICD-10-CM |
| J95.88                                     | Other intraoperative complications of respiratory system, not elsewhere classified                         | Diagnosis | ICD-10-CM |
| J95.89                                     | Other postprocedural complications and disorders of respiratory system, not elsewhere classified           | Diagnosis | ICD-10-CM |
| 487.0                                      | Influenza with pneumonia                                                                                   | Diagnosis | ICD-10-CM |
| 488.01                                     | Influenza due to identified avian influenza virus with pneumonia                                           | Diagnosis | ICD-10-CM |
| 488.11                                     | Influenza due to identified 2009 H1N1 influenza virus with pneumonia                                       | Diagnosis | ICD-10-CM |
| 488.81                                     | Influenza due to identified novel influenza A virus with pneumonia                                         | Diagnosis | ICD-10-CM |
| J09.X1                                     | Influenza due to identified novel influenza A virus with pneumonia                                         | Diagnosis | ICD-10-CM |
| J10.00                                     | Influenza due to other identified influenza virus with unspecified type of pneumonia                       | Diagnosis | ICD-10-CM |
| J10.01                                     | Influenza due to other identified influenza virus with the same other identified influenza virus pneumonia | Diagnosis | ICD-10-CM |
| J10.08                                     | Influenza due to other identified influenza virus with other specified pneumonia                           | Diagnosis | ICD-10-CM |
| J11.00                                     | Influenza due to unidentified influenza virus with unspecified type of pneumonia                           | Diagnosis | ICD-10-CM |
| J11.08                                     | Influenza due to unidentified influenza virus with specified pneumonia                                     | Diagnosis | ICD-10-CM |
| J12.82                                     | Pneumonia due to coronavirus disease 2019                                                                  | Diagnosis | ICD-10-CM |
| <b>Acute Respiratory Failure</b>           |                                                                                                            |           |           |
| 518.81                                     | Acute respiratory failure                                                                                  | Diagnosis | ICD-9-CM  |
| J96.00                                     | Acute respiratory failure, unspecified whether with hypoxia or hypercapnia                                 | Diagnosis | ICD-10-CM |
| J96.01                                     | Acute respiratory failure with hypoxia                                                                     | Diagnosis | ICD-10-CM |
| J96.02                                     | Acute respiratory failure with hypercapnia                                                                 | Diagnosis | ICD-10-CM |
| J96.90                                     | Respiratory failure, unspecified, unspecified whether with hypoxia or hypercapnia                          | Diagnosis | ICD-10-CM |
| J96.91                                     | Respiratory failure, unspecified with hypoxia                                                              | Diagnosis | ICD-10-CM |
| J96.92                                     | Respiratory failure, unspecified with hypercapnia                                                          | Diagnosis | ICD-10-CM |
| <b>Acute Respiratory Distress Syndrome</b> |                                                                                                            |           |           |
| 518.82                                     | Other pulmonary insufficiency, not elsewhere classified                                                    | Diagnosis | ICD-9-CM  |
| J80                                        | Acute respiratory distress syndrome                                                                        | Diagnosis | ICD-10-CM |
| <b>Sepsis</b>                              |                                                                                                            |           |           |
| 038.0                                      | Streptococcal septicemia                                                                                   | Diagnosis | ICD-9-CM  |
| 038.1                                      | Staphylococcal septicemia                                                                                  | Diagnosis | ICD-9-CM  |
| 038.10                                     | Unspecified staphylococcal septicemia                                                                      | Diagnosis | ICD-9-CM  |

| <b>Code</b> | <b>Description</b>                                                               | <b>Code</b>     | <b>Code Type</b> |
|-------------|----------------------------------------------------------------------------------|-----------------|------------------|
|             |                                                                                  | <b>Category</b> |                  |
| 038.11      | Methicillin susceptible Staphylococcus aureus septicemia                         | Diagnosis       | ICD-9-CM         |
| 038.12      | Methicillin resistant Staphylococcus aureus septicemia                           | Diagnosis       | ICD-9-CM         |
| 038.19      | Other staphylococcal septicemia                                                  | Diagnosis       | ICD-9-CM         |
| 038.2       | Pneumococcal septicemia                                                          | Diagnosis       | ICD-9-CM         |
| 038.3       | Septicemia due to anaerobes                                                      | Diagnosis       | ICD-9-CM         |
| 038.4       | Septicemia due to other gram-negative organisms                                  | Diagnosis       | ICD-9-CM         |
| 038.40      | Septicemia due to unspecified gram-negative organism                             | Diagnosis       | ICD-9-CM         |
| 038.41      | Septicemia due to hemophilus influenzae (H. influenzae)                          | Diagnosis       | ICD-9-CM         |
| 038.42      | Septicemia due to Escherichia coli (E. coli)                                     | Diagnosis       | ICD-9-CM         |
| 038.43      | Septicemia due to pseudomonas                                                    | Diagnosis       | ICD-9-CM         |
| 038.44      | Septicemia due to serratia                                                       | Diagnosis       | ICD-9-CM         |
| 038.49      | Other septicemia due to gram-negative organism                                   | Diagnosis       | ICD-9-CM         |
| 038.8       | Other specified septicemia                                                       | Diagnosis       | ICD-9-CM         |
| 038.9       | Unspecified septicemia                                                           | Diagnosis       | ICD-9-CM         |
| 785.52      | Septic shock                                                                     | Diagnosis       | ICD-9-CM         |
| 995.90      | Systemic inflammatory response syndrome, unspecified                             | Diagnosis       | ICD-9-CM         |
| 995.91      | Sepsis                                                                           | Diagnosis       | ICD-9-CM         |
| 995.92      | Severe sepsis                                                                    | Diagnosis       | ICD-9-CM         |
| A02.1       | Salmonella sepsis                                                                | Diagnosis       | ICD-10-CM        |
| A22.7       | Anthrax sepsis                                                                   | Diagnosis       | ICD-10-CM        |
| A26.7       | Erysipelothrix sepsis                                                            | Diagnosis       | ICD-10-CM        |
| A32.7       | Listerial sepsis                                                                 | Diagnosis       | ICD-10-CM        |
| A40.0       | Sepsis due to streptococcus, group A                                             | Diagnosis       | ICD-10-CM        |
| A40.1       | Sepsis due to streptococcus, group B                                             | Diagnosis       | ICD-10-CM        |
| A40.3       | Sepsis due to Streptococcus pneumoniae                                           | Diagnosis       | ICD-10-CM        |
| A40.8       | Other streptococcal sepsis                                                       | Diagnosis       | ICD-10-CM        |
| A40.9       | Streptococcal sepsis, unspecified                                                | Diagnosis       | ICD-10-CM        |
| A41.0       | Sepsis due to Staphylococcus aureus                                              | Diagnosis       | ICD-10-CM        |
| A41.01      | Sepsis due to Methicillin susceptible Staphylococcus aureus                      | Diagnosis       | ICD-10-CM        |
| A41.02      | Sepsis due to Methicillin resistant Staphylococcus aureus                        | Diagnosis       | ICD-10-CM        |
| A41.0Z16    | Sepsis due to Staphylococcus aureus Infection with drug resistant microorganisms | Diagnosis       | ICD-10-CM        |
| A41.1       | Sepsis due to other specified staphylococcus                                     | Diagnosis       | ICD-10-CM        |
| A41.2       | Sepsis due to unspecified staphylococcus                                         | Diagnosis       | ICD-10-CM        |
| A41.3       | Sepsis due to Hemophilus influenzae                                              | Diagnosis       | ICD-10-CM        |
| A41.4       | Sepsis due to anaerobes                                                          | Diagnosis       | ICD-10-CM        |
| A41.50      | Gram-negative sepsis, unspecified                                                | Diagnosis       | ICD-10-CM        |
| A41.51      | Sepsis due to Escherichia coli [E. coli]                                         | Diagnosis       | ICD-10-CM        |
| A41.52      | Sepsis due to Pseudomonas                                                        | Diagnosis       | ICD-10-CM        |
| A41.53      | Sepsis due to Serratia                                                           | Diagnosis       | ICD-10-CM        |
| A41.59      | Other Gram-negative sepsis                                                       | Diagnosis       | ICD-10-CM        |
| A41.81      | Sepsis due to Enterococcus                                                       | Diagnosis       | ICD-10-CM        |
| A41.89      | Other specified sepsis                                                           | Diagnosis       | ICD-10-CM        |
| A41.9       | Sepsis, unspecified organism                                                     | Diagnosis       | ICD-10-CM        |
| A42.7       | Actinomycotic sepsis                                                             | Diagnosis       | ICD-10-CM        |
| A54.86      | Gonococcal sepsis                                                                | Diagnosis       | ICD-10-CM        |



| <b>Code</b>                     | <b>Description</b>                                                    | <b>Code Category</b> | <b>Code Type</b> |
|---------------------------------|-----------------------------------------------------------------------|----------------------|------------------|
| B37.7                           | Candidal sepsis                                                       | Diagnosis            | ICD-10-CM        |
| R65.20                          | Severe sepsis without septic shock                                    | Diagnosis            | ICD-10-CM        |
| R65.21                          | Severe sepsis with septic shock                                       | Diagnosis            | ICD-10-CM        |
| 003.1                           | Salmonella septicemia                                                 | Diagnosis            | ICD-10-CM        |
| 022.3                           | Anthrax septicemia                                                    | Diagnosis            | ICD-10-CM        |
| 670.20                          | Puerperal sepsis, unspecified as to episode of care or not applicable | Diagnosis            | ICD-10-CM        |
| 670.22                          | Puerperal sepsis, delivered, with mention of postpartum complication  | Diagnosis            | ICD-10-CM        |
| 670.24                          | Puerperal sepsis, postpartum condition or complication                | Diagnosis            | ICD-10-CM        |
| 771.81                          | Septicemia (sepsis) of newborn                                        | Diagnosis            | ICD-10-CM        |
| A40                             | Streptococcal sepsis                                                  | Diagnosis            | ICD-10-CM        |
| A41                             | Other sepsis                                                          | Diagnosis            | ICD-10-CM        |
| A41.5                           | Sepsis due to other Gram-negative organisms                           | Diagnosis            | ICD-10-CM        |
| A41.8                           | Other specified sepsis                                                | Diagnosis            | ICD-10-CM        |
| O03.37                          | Sepsis following incomplete spontaneous abortion                      | Diagnosis            | ICD-10-CM        |
| O03.87                          | Sepsis following complete or unspecified spontaneous abortion         | Diagnosis            | ICD-10-CM        |
| O04.87                          | Sepsis following (induced) termination of pregnancy                   | Diagnosis            | ICD-10-CM        |
| O07.37                          | Sepsis following failed attempted termination of pregnancy            | Diagnosis            | ICD-10-CM        |
| O08.82                          | Sepsis following ectopic and molar pregnancy                          | Diagnosis            | ICD-10-CM        |
| O85                             | Puerperal sepsis                                                      | Diagnosis            | ICD-10-CM        |
| O86.04                          | Sepsis following an obstetrical procedure                             | Diagnosis            | ICD-10-CM        |
| P36                             | Bacterial sepsis of newborn                                           | Diagnosis            | ICD-10-CM        |
| P36.0                           | Sepsis of newborn due to streptococcus, group B                       | Diagnosis            | ICD-10-CM        |
| P36.1                           | Sepsis of newborn due to other and unspecified streptococci           | Diagnosis            | ICD-10-CM        |
| P36.10                          | Sepsis of newborn due to unspecified streptococci                     | Diagnosis            | ICD-10-CM        |
| P36.19                          | Sepsis of newborn due to other streptococci                           | Diagnosis            | ICD-10-CM        |
| P36.2                           | Sepsis of newborn due to Staphylococcus aureus                        | Diagnosis            | ICD-10-CM        |
| P36.3                           | Sepsis of newborn due to other and unspecified staphylococci          | Diagnosis            | ICD-10-CM        |
| P36.30                          | Sepsis of newborn due to unspecified staphylococci                    | Diagnosis            | ICD-10-CM        |
| P36.39                          | Sepsis of newborn due to other staphylococci                          | Diagnosis            | ICD-10-CM        |
| P36.4                           | Sepsis of newborn due to Escherichia coli                             | Diagnosis            | ICD-10-CM        |
| P36.5                           | Sepsis of newborn due to anaerobes                                    | Diagnosis            | ICD-10-CM        |
| P36.8                           | Other bacterial sepsis of newborn                                     | Diagnosis            | ICD-10-CM        |
| P36.9                           | Bacterial sepsis of newborn, unspecified                              | Diagnosis            | ICD-10-CM        |
| R65.2                           | Severe sepsis                                                         | Diagnosis            | ICD-10-CM        |
| T81.44                          | Sepsis following a procedure                                          | Diagnosis            | ICD-10-CM        |
| T81.44XA                        | Sepsis following a procedure, initial encounter                       | Diagnosis            | ICD-10-CM        |
| T81.44XD                        | Sepsis following a procedure, subsequent encounter                    | Diagnosis            | ICD-10-CM        |
| T81.44XS                        | Sepsis following a procedure, sequela                                 | Diagnosis            | ICD-10-CM        |
| <b>Myocarditis/Pericarditis</b> |                                                                       |                      |                  |
| I30                             | Acute pericarditis                                                    | Diagnosis            | ICD-10-CM        |
| I30.0                           | Acute nonspecific idiopathic pericarditis                             | Diagnosis            | ICD-10-CM        |
| I30.1                           | Infective pericarditis                                                | Diagnosis            | ICD-10-CM        |
| I30.8                           | Other forms of acute pericarditis                                     | Diagnosis            | ICD-10-CM        |
| I30.9                           | Acute pericarditis, unspecified                                       | Diagnosis            | ICD-10-CM        |
| I31                             | Other diseases of pericardium                                         | Diagnosis            | ICD-10-CM        |

| Code                                              | Description                                                                                                                                                                                                                    | Code      |            |
|---------------------------------------------------|--------------------------------------------------------------------------------------------------------------------------------------------------------------------------------------------------------------------------------|-----------|------------|
|                                                   |                                                                                                                                                                                                                                | Category  | Code Type  |
| I31.0                                             | Chronic adhesive pericarditis                                                                                                                                                                                                  | Diagnosis | ICD-10-CM  |
| I31.1                                             | Chronic constrictive pericarditis                                                                                                                                                                                              | Diagnosis | ICD-10-CM  |
| I31.2                                             | Hemopericardium, not elsewhere classified                                                                                                                                                                                      | Diagnosis | ICD-10-CM  |
| I31.3                                             | Pericardial effusion (noninflammatory)                                                                                                                                                                                         | Diagnosis | ICD-10-CM  |
| I31.4                                             | Cardiac tamponade                                                                                                                                                                                                              | Diagnosis | ICD-10-CM  |
| I31.8                                             | Other specified diseases of pericardium                                                                                                                                                                                        | Diagnosis | ICD-10-CM  |
| I31.9                                             | Disease of pericardium, unspecified                                                                                                                                                                                            | Diagnosis | ICD-10-CM  |
| I32                                               | Pericarditis in diseases classified elsewhere                                                                                                                                                                                  | Diagnosis | ICD-10-CM  |
| I40                                               | Acute myocarditis                                                                                                                                                                                                              | Diagnosis | ICD-10-CM  |
| I40.0                                             | Infective myocarditis                                                                                                                                                                                                          | Diagnosis | ICD-10-CM  |
| I40.1                                             | Isolated myocarditis                                                                                                                                                                                                           | Diagnosis | ICD-10-CM  |
| I40.8                                             | Other acute myocarditis                                                                                                                                                                                                        | Diagnosis | ICD-10-CM  |
| I40.9                                             | Acute myocarditis, unspecified                                                                                                                                                                                                 | Diagnosis | ICD-10-CM  |
| I41                                               | Myocarditis in diseases classified elsewhere                                                                                                                                                                                   | Diagnosis | ICD-10-CM  |
| <b>Bilevel Positive Airway Pressure (BiPAP)</b>   |                                                                                                                                                                                                                                |           |            |
| A7027                                             | Combination oral/nasal mask, used with continuous positive airway pressure device, each                                                                                                                                        | Procedure | HCPCS      |
| A7030                                             | Full face mask used with positive airway pressure device, each                                                                                                                                                                 | Procedure | HCPCS      |
| A7034                                             | Nasal interface (mask or cannula type) used with positive airway pressure device, with or without head strap                                                                                                                   | Procedure | HCPCS      |
| A7044                                             | Oral interface used with positive airway pressure device, each                                                                                                                                                                 | Procedure | HCPCS      |
| A7045                                             | Exhalation port with or without swivel used with accessories for positive airway devices, replacement only                                                                                                                     | Procedure | HCPCS      |
| A7046                                             | Water chamber for humidifier, used with positive airway pressure device, replacement, each                                                                                                                                     | Procedure | HCPCS      |
| E0470                                             | Respiratory assist device, bi-level pressure capability, without backup rate feature, used with noninvasive interface, e.g., nasal or facial mask (intermittent assist device with continuous positive airway pressure device) | Procedure | HCPCS      |
| E0471                                             | Respiratory assist device, bi-level pressure capability, with back-up rate feature, used with noninvasive interface, e.g., nasal or facial mask (intermittent assist device with continuous positive airway pressure device)   | Procedure | HCPCS      |
| E0472                                             | Respiratory assist device, bi-level pressure capability, with backup rate feature, used with invasive interface, e.g., tracheostomy tube (intermittent assist device with continuous positive airway pressure device)          | Procedure | HCPCS      |
| E0561                                             | Humidifier, nonheated, used with positive airway pressure device                                                                                                                                                               | Procedure | HCPCS      |
| E0562                                             | Humidifier, heated, used with positive airway pressure device                                                                                                                                                                  | Procedure | HCPCS      |
| <b>Extracorporeal Membrane Oxygenation (ECMO)</b> |                                                                                                                                                                                                                                |           |            |
| 39.65                                             | Extracorporeal membrane oxygenation (ECMO)                                                                                                                                                                                     | Procedure | ICD-9-PCS  |
| 5A15223                                           | Extracorporeal Membrane Oxygenation, Continuous                                                                                                                                                                                | Procedure | ICD-10-PCS |
| 5A1522F                                           | Extracorporeal Oxygenation, Membrane, Central                                                                                                                                                                                  | Procedure | ICD-10-PCS |
| 5A1522G                                           | Extracorporeal Oxygenation, Membrane, Peripheral Veno-arterial                                                                                                                                                                 | Procedure | ICD-10-PCS |
| 5A1522H                                           | Extracorporeal Oxygenation, Membrane, Peripheral Veno-venous                                                                                                                                                                   | Procedure | ICD-10-PCS |
| 5A15A2F                                           | Extracorporeal Oxygenation, Membrane, Central, Intraoperative                                                                                                                                                                  | Procedure | ICD-10-PCS |
| 5A15A2G                                           | Extracorporeal Oxygenation, Membrane, Peripheral Veno-arterial, Intraoperative                                                                                                                                                 | Procedure | ICD-10-PCS |
| 5A15A2H                                           | Extracorporeal Oxygenation, Membrane, Peripheral Veno-venous, Intraoperative                                                                                                                                                   | Procedure | ICD-10-PCS |

| Code    | Description                                                                                                                                                                                                                                         | Code      |           |
|---------|-----------------------------------------------------------------------------------------------------------------------------------------------------------------------------------------------------------------------------------------------------|-----------|-----------|
|         |                                                                                                                                                                                                                                                     | Category  | Code Type |
| 1022227 | Extracorporeal membrane oxygenation (ecmo)/ extracorporeal life support (ecls) provided by physician                                                                                                                                                | Procedure | CPT-4     |
| 33988   | Insertion of left heart vent by thoracic incision (eg, sternotomy, thoracotomy) for ECMO/ECLS                                                                                                                                                       | Procedure | CPT-4     |
| 33947   | Extracorporeal membrane oxygenation (ECMO)/extracorporeal life support (ECLS) provided by physician; initiation, veno-arterial                                                                                                                      | Procedure | CPT-4     |
| 33965   | Extracorporeal membrane oxygenation (ECMO)/extracorporeal life support (ECLS) provided by physician; removal of peripheral (arterial and/or venous) cannula(e), percutaneous, birth through 5 years of age                                          | Procedure | CPT-4     |
| 33955   | Extracorporeal membrane oxygenation (ECMO)/extracorporeal life support (ECLS) provided by physician; insertion of central cannula(e) by sternotomy or thoracotomy, birth through 5 years of age                                                     | Procedure | CPT-4     |
| 33964   | Extracorporeal membrane oxygenation (ECMO)/extracorporeal life support (ECLS) provided by physician; reposition central cannula(e) by sternotomy or thoracotomy, 6 years and older (includes fluoroscopic guidance, when performed)                 | Procedure | CPT-4     |
| 33953   | Extracorporeal membrane oxygenation (ECMO)/extracorporeal life support (ECLS) provided by physician; insertion of peripheral (arterial and/or venous) cannula(e), open, birth through 5 years of age                                                | Procedure | CPT-4     |
| 33959   | Extracorporeal membrane oxygenation (ECMO)/extracorporeal life support (ECLS) provided by physician; reposition peripheral (arterial and/or venous) cannula(e), open, birth through 5 years of age (includes fluoroscopic guidance, when performed) | Procedure | CPT-4     |
| 33984   | Extracorporeal membrane oxygenation (ECMO)/extracorporeal life support (ECLS) provided by physician; removal of peripheral (arterial and/or venous) cannula(e), open, 6 years and older                                                             | Procedure | CPT-4     |
| 33962   | Extracorporeal membrane oxygenation (ECMO)/extracorporeal life support (ECLS) provided by physician; reposition peripheral (arterial and/or venous) cannula(e), open, 6 years and older (includes fluoroscopic guidance, when performed)            | Procedure | CPT-4     |
| 33958   | Extracorporeal membrane oxygenation (ECMO)/extracorporeal life support (ECLS) provided by physician; reposition peripheral (arterial and/or venous) cannula(e), percutaneous, 6 years and older (includes fluoroscopic guidance, when performed)    | Procedure | CPT-4     |
| 33986   | Extracorporeal membrane oxygenation (ECMO)/extracorporeal life support (ECLS) provided by physician; removal of central cannula(e) by sternotomy or thoracotomy, 6 years and older                                                                  | Procedure | CPT-4     |
| 33952   | Extracorporeal membrane oxygenation (ECMO)/extracorporeal life support (ECLS) provided by physician; insertion of peripheral (arterial and/or venous) cannula(e), percutaneous, 6 years and older (includes fluoroscopic guidance, when performed)  | Procedure | CPT-4     |
| 33948   | Extracorporeal membrane oxygenation (ECMO)/extracorporeal life support (ECLS) provided by physician; daily management, each day, veno-venous                                                                                                        | Procedure | CPT-4     |
| 33989   | Removal of left heart vent by thoracic incision (eg, sternotomy, thoracotomy) for ECMO/ECLS                                                                                                                                                         | Procedure | CPT-4     |
| 33946   | Extracorporeal membrane oxygenation (ECMO)/extracorporeal life support (ECLS) provided by physician; initiation, veno-venous                                                                                                                        | Procedure | CPT-4     |

| Code  | Description                                                                                                                                                                                                                                                   | Code      |           |
|-------|---------------------------------------------------------------------------------------------------------------------------------------------------------------------------------------------------------------------------------------------------------------|-----------|-----------|
|       |                                                                                                                                                                                                                                                               | Category  | Code Type |
| 36822 | Insertion of cannula(s) for prolonged extracorporeal circulation for cardiopulmonary insufficiency (ECMO) (separate procedure)                                                                                                                                | Procedure | CPT-4     |
| 33954 | Extracorporeal membrane oxygenation (ECMO)/extracorporeal life support (ECLS) provided by physician; insertion of peripheral (arterial and/or venous) cannula(e), open, 6 years and older                                                                     | Procedure | CPT-4     |
| 33951 | Extracorporeal membrane oxygenation (ECMO)/extracorporeal life support (ECLS) provided by physician; insertion of peripheral (arterial and/or venous) cannula(e), percutaneous, birth through 5 years of age (includes fluoroscopic guidance, when performed) | Procedure | CPT-4     |
| 33963 | Extracorporeal membrane oxygenation (ECMO)/extracorporeal life support (ECLS) provided by physician; reposition of central cannula(e) by sternotomy or thoracotomy, birth through 5 years of age (includes fluoroscopic guidance, when performed)             | Procedure | CPT-4     |
| 33969 | Extracorporeal membrane oxygenation (ECMO)/extracorporeal life support (ECLS) provided by physician; removal of peripheral (arterial and/or venous) cannula(e), open, birth through 5 years of age                                                            | Procedure | CPT-4     |
| 33966 | Extracorporeal membrane oxygenation (ECMO)/extracorporeal life support (ECLS) provided by physician; removal of peripheral (arterial and/or venous) cannula(e), percutaneous, 6 years and older                                                               | Procedure | CPT-4     |
| 33987 | Arterial exposure with creation of graft conduit (eg, chimney graft) to facilitate arterial perfusion for ECMO/ECLS (List separately in addition to code for primary procedure)                                                                               | Procedure | CPT-4     |
| 33957 | Extracorporeal membrane oxygenation (ECMO)/extracorporeal life support (ECLS) provided by physician; reposition peripheral (arterial and/or venous) cannula(e), percutaneous, birth through 5 years of age (includes fluoroscopic guidance, when performed)   | Procedure | CPT-4     |
| 33985 | Extracorporeal membrane oxygenation (ECMO)/extracorporeal life support (ECLS) provided by physician; removal of central cannula(e) by sternotomy or thoracotomy, birth through 5 years of age                                                                 | Procedure | CPT-4     |
| 33949 | Extracorporeal membrane oxygenation (ECMO)/extracorporeal life support (ECLS) provided by physician; daily management, each day, veno-arterial                                                                                                                | Procedure | CPT-4     |
| 33956 | Extracorporeal membrane oxygenation (ECMO)/extracorporeal life support (ECLS) provided by physician; insertion of central cannula(e) by sternotomy or thoracotomy, 6 years and older                                                                          | Procedure | CPT-4     |
| 33960 | Prolonged extracorporeal circulation for cardiopulmonary insufficiency; initial day                                                                                                                                                                           | Procedure | CPT-4     |
| 33961 | Prolonged extracorporeal circulation for cardiopulmonary insufficiency; each subsequent day                                                                                                                                                                   | Procedure | CPT-4     |

#### Intensive Care Unit (ICU)

|     |                      |           |         |
|-----|----------------------|-----------|---------|
| 200 | ICU general          | Procedure | Revenue |
| 201 | ICU surgical         | Procedure | Revenue |
| 202 | ICU medical          | Procedure | Revenue |
| 203 | ICU pediatric        | Procedure | Revenue |
| 204 | ICU psychiatric stay | Procedure | Revenue |
| 206 | ICU intermediate     | Procedure | Revenue |
| 207 | ICU burn care        | Procedure | Revenue |

| <b>Code</b> | <b>Description</b>                                                                                                                                                                                                                           | <b>Code</b>     | <b>Code Type</b> |
|-------------|----------------------------------------------------------------------------------------------------------------------------------------------------------------------------------------------------------------------------------------------|-----------------|------------------|
|             |                                                                                                                                                                                                                                              | <b>Category</b> |                  |
| 208         | ICU trauma                                                                                                                                                                                                                                   | Procedure       | Revenue          |
| 209         | ICU other                                                                                                                                                                                                                                    | Procedure       | Revenue          |
| 210         | CCU                                                                                                                                                                                                                                          | Procedure       | Revenue          |
| 211         | CCU myo infarc                                                                                                                                                                                                                               | Procedure       | Revenue          |
| 212         | CCU pulmonary                                                                                                                                                                                                                                | Procedure       | Revenue          |
| 213         | CCU transplant                                                                                                                                                                                                                               | Procedure       | Revenue          |
| 214         | CCU intermediate                                                                                                                                                                                                                             | Procedure       | Revenue          |
| 219         | CCU other                                                                                                                                                                                                                                    | Procedure       | Revenue          |
| 0581F       | Patient transferred directly from anesthetizing location to critical care unit (Peri2)                                                                                                                                                       | Procedure       | CPT-4            |
| 0582F       | Patient not transferred directly from anesthetizing location to critical care unit (Peri                                                                                                                                                     | Procedure       | CPT-4            |
| 0188T       | Remote real-time interactive video-conferenced critical care, evaluation and management of the critically ill or critically injured patient; first 30-74 minutes                                                                             | Procedure       | CPT-4            |
| 0189T       | Remote real-time interactive video-conferenced critical care, evaluation and management of the critically ill or critically injured patient; each additional 30 minutes (List separately in addition to code for primary service)            | Procedure       | CPT-4            |
| 99171       | Critical Care, Subsequent Follow-up Visit; Brief Examination, Evaluation And/or Treatment For Same Illness                                                                                                                                   | Procedure       | CPT-4            |
| 99160       | Critical Care, Initial, Including The Diagnostic And Therapeutic Services And Direction Of Care Of The Critically Ill Or Multiply Injured Or Comatose Patient, Requiring The Prolonged Presence Of The Physician; First Hour                 | Procedure       | CPT-4            |
| 99162       | Critical Care, Initial, Including The Diagnostic And Therapeutic Services And Direction Of Care Of The Critically Ill Or Multiply Injured Or Comatose Patient, Requiring The Prolonged Presence Of The Physician; Each Additional 30 Minutes | Procedure       | CPT-4            |
| 99291       | Critical care, evaluation and management of the critically ill or critically injured patient; first 30-74 minutes                                                                                                                            | Procedure       | CPT-4            |
| 99292       | Critical care, evaluation and management of the critically ill or critically injured patient; each additional 30 minutes (List separately in addition to code for primary service)                                                           | Procedure       | CPT-4            |
| G0390       | Trauma response team associated with hospital critical care service                                                                                                                                                                          | Procedure       | HCPCS            |
| G0509       | Telehealth consultation, critical care, subsequent, physicians typically spend 50 minutes communicating with the patient and providers via telehealth                                                                                        | Procedure       | HCPCS            |
| G0508       | Telehealth consultation, critical care, initial, physicians typically spend 60 minutes communicating with the patient and providers via telehealth                                                                                           | Procedure       | HCPCS            |
| G0240       | Critical care service delivered by a physician, face to face; during interfacility transport of a critically ill or critically injured patient; first 30-74 minutes of active transport                                                      | Procedure       | HCPCS            |

### Invasive Mechanical Ventilation

|         |                                                                                             |           |            |
|---------|---------------------------------------------------------------------------------------------|-----------|------------|
| Z99.1   | Dependence on respirator                                                                    | Diagnosis | ICD-10-CM  |
| Z99.11  | Dependence on respirator [ventilator] status                                                | Diagnosis | ICD-10-CM  |
| 09HN7BZ | Insertion of Airway into Nasopharynx, Via Natural or Artificial Opening                     | Procedure | ICD-10-PCS |
| 09HN8BZ | Insertion of Airway into Nasopharynx, Via Natural or Artificial Opening Endoscopic          | Procedure | ICD-10-PCS |
| 0BH13EZ | Insertion of Endotracheal Airway into Trachea, Percutaneous Approach                        | Procedure | ICD-10-PCS |
| 0BH17EZ | Insertion of Endotracheal Airway into Trachea, Via Natural or Artificial Opening            | Procedure | ICD-10-PCS |
| 0BH18EZ | Insertion of Endotracheal Airway into Trachea, Via Natural or Artificial Opening Endoscopic | Procedure | ICD-10-PCS |

| Code    | Description                                                                                                                                                                            | Code      |            |
|---------|----------------------------------------------------------------------------------------------------------------------------------------------------------------------------------------|-----------|------------|
|         |                                                                                                                                                                                        | Category  | Code Type  |
| 0CHY7BZ | Insertion of Airway into Mouth and Throat, Via Natural or Artificial Opening                                                                                                           | Procedure | ICD-10-PCS |
| 0CHY8BZ | Insertion of Airway into Mouth and Throat, Via Natural or Artificial Opening<br>Endoscopic                                                                                             | Procedure | ICD-10-PCS |
| 0DH57BZ | Insertion of Airway into Esophagus, Via Natural or Artificial Opening                                                                                                                  | Procedure | ICD-10-PCS |
| 0DH58BZ | Insertion of Airway into Esophagus, Via Natural or Artificial Opening Endoscopic                                                                                                       | Procedure | ICD-10-PCS |
| 0WHQ73Z | Insertion of Infusion Device into Respiratory Tract, Via Natural or Artificial Opening                                                                                                 | Procedure | ICD-10-PCS |
| 0WHQ7YZ | Insertion of Other Device into Respiratory Tract, Via Natural or Artificial Opening                                                                                                    | Procedure | ICD-10-PCS |
| 5A0920Z | Assistance with Respiratory Filtration, Continuous                                                                                                                                     | Procedure | ICD-10-PCS |
| 5A09357 | Assistance with Respiratory Ventilation, Less than 24 Consecutive Hours,<br>Continuous Positive Airway Pressure                                                                        | Procedure | ICD-10-PCS |
| 5A09358 | Assistance with Respiratory Ventilation, Less than 24 Consecutive Hours,<br>Intermittent Positive Airway Pressure                                                                      | Procedure | ICD-10-PCS |
| 5A09359 | Assistance with Respiratory Ventilation, Less than 24 Consecutive Hours,<br>Continuous Negative Airway Pressure                                                                        | Procedure | ICD-10-PCS |
| 5A0935A | Assistance with Respiratory Ventilation, Less than 24 Consecutive Hours, High<br>Nasal Flow/Velocity                                                                                   | Procedure | ICD-10-PCS |
| 5A0935B | Assistance with Respiratory Ventilation, Less than 24 Consecutive Hours,<br>Intermittent Negative Airway Pressure                                                                      | Procedure | ICD-10-PCS |
| 5A0935Z | Assistance with Respiratory Ventilation, Less than 24 Consecutive Hours                                                                                                                | Procedure | ICD-10-PCS |
| 5A09457 | Assistance with Respiratory Ventilation, 24-96 Consecutive Hours, Continuous<br>Positive Airway Pressure                                                                               | Procedure | ICD-10-PCS |
| 5A09458 | Assistance with Respiratory Ventilation, 24-96 Consecutive Hours, Intermittent<br>Positive Airway Pressure                                                                             | Procedure | ICD-10-PCS |
| 5A09459 | Assistance with Respiratory Ventilation, 24-96 Consecutive Hours, Continuous<br>Negative Airway Pressure                                                                               | Procedure | ICD-10-PCS |
| 5A0945A | Assistance with Respiratory Ventilation, 24-96 Consecutive Hours, High Nasal<br>Flow/Velocity                                                                                          | Procedure | ICD-10-PCS |
| 5A0945B | Assistance with Respiratory Ventilation, 24-96 Consecutive Hours, Intermittent<br>Negative Airway Pressure                                                                             | Procedure | ICD-10-PCS |
| 5A0945Z | Assistance with Respiratory Ventilation, 24-96 Consecutive Hours                                                                                                                       | Procedure | ICD-10-PCS |
| 5A09557 | Assistance with Respiratory Ventilation, Greater than 96 Consecutive Hours,<br>Continuous Positive Airway Pressure                                                                     | Procedure | ICD-10-PCS |
| 5A09558 | Assistance with Respiratory Ventilation, Greater than 96 Consecutive Hours,<br>Intermittent Positive Airway Pressure                                                                   | Procedure | ICD-10-PCS |
| 5A09559 | Assistance with Respiratory Ventilation, Greater than 96 Consecutive Hours,<br>Continuous Negative Airway Pressure                                                                     | Procedure | ICD-10-PCS |
| 5A0955A | Assistance with Respiratory Ventilation, Greater than 96 Consecutive Hours, High<br>Nasal Flow/Velocity                                                                                | Procedure | ICD-10-PCS |
| 5A0955B | Assistance with Respiratory Ventilation, Greater than 96 Consecutive Hours,<br>Intermittent Negative Airway Pressure                                                                   | Procedure | ICD-10-PCS |
| 5A0955Z | Assistance with Respiratory Ventilation, Greater than 96 Consecutive Hours                                                                                                             | Procedure | ICD-10-PCS |
| 31500   | Intubation, endotracheal, emergency procedure                                                                                                                                          | Procedure | CPT-4      |
| 94003   | Ventilation assist and management, initiation of pressure or volume preset<br>ventilators for assisted or controlled breathing; hospital inpatient/observation,<br>each subsequent day | Procedure | CPT-4      |

| Code                          | Description                                                                                                                                                                                                           | Code      |            |
|-------------------------------|-----------------------------------------------------------------------------------------------------------------------------------------------------------------------------------------------------------------------|-----------|------------|
|                               |                                                                                                                                                                                                                       | Category  | Code Type  |
| 94002                         | Ventilation assist and management, initiation of pressure or volume preset ventilators for assisted or controlled breathing; hospital inpatient/observation, initial day                                              | Procedure | CPT-4      |
| A0396                         | ALS specialized service disposable supplies; esophageal intubation                                                                                                                                                    | Procedure | HCPCS      |
| E0481                         | Intrapulmonary percussive ventilation system and related accessories                                                                                                                                                  | Procedure | HCPCS      |
| G8569                         | Prolonged postoperative intubation (> 24 hrs) required                                                                                                                                                                | Procedure | HCPCS      |
| E0472                         | Respiratory assist device, bi-level pressure capability, with backup rate feature, used with invasive interface, e.g., tracheostomy tube (intermittent assist device with continuous positive airway pressure device) | Procedure | HCPCS      |
| A4483                         | Moisture exchanger, disposable, for use with invasive mechanical ventilation                                                                                                                                          | Procedure | HCPCS      |
| Potential COVID-19 Treatments |                                                                                                                                                                                                                       |           |            |
| XW033E5                       | Introduction of Remdesivir Anti-infective into Peripheral Vein, Percutaneous Approach, New Technology Group 5                                                                                                         | Procedure | ICD-10-PCS |
| XW043E5                       | Introduction of Remdesivir Anti-infective into Central Vein, Percutaneous Approach, New Technology Group 5                                                                                                            | Procedure | ICD-10-PCS |
| C9264                         | Injection, tocilizumab, 1 mg                                                                                                                                                                                          | Procedure | HCPCS      |
| J3262                         | Injection, tocilizumab, 1 mg                                                                                                                                                                                          | Procedure | HCPCS      |
| C9236                         | Injection, eculizumab, 10 mg                                                                                                                                                                                          | Procedure | HCPCS      |
| J1300                         | Injection, eculizumab, 10 mg                                                                                                                                                                                          | Procedure | HCPCS      |
| J1020                         | Injection, methylprednisolone acetate, 20 mg                                                                                                                                                                          | Procedure | HCPCS      |
| J1030                         | Injection, methylprednisolone acetate, 40 mg                                                                                                                                                                          | Procedure | HCPCS      |
| J1040                         | Injection, methylprednisolone acetate, 80 mg                                                                                                                                                                          | Procedure | HCPCS      |
| J2920                         | Injection, methylprednisolone sodium succinate, up to 40 mg                                                                                                                                                           | Procedure | HCPCS      |
| J2930                         | Injection, methylprednisolone sodium succinate, up to 125 mg                                                                                                                                                          | Procedure | HCPCS      |
| J7509                         | Methylprednisolone, oral, per 4 mg                                                                                                                                                                                    | Procedure | HCPCS      |
| J1094                         | Injection, dexamethasone acetate, 1 mg                                                                                                                                                                                | Procedure | HCPCS      |
| J1100                         | Injection, dexamethasone sodium phosphate, 1 mg                                                                                                                                                                       | Procedure | HCPCS      |
| J8540                         | Dexamethasone, oral, 0.25 mg                                                                                                                                                                                          | Procedure | HCPCS      |
| S0173                         | Dexamethasone, oral, 4 mg                                                                                                                                                                                             | Procedure | HCPCS      |
| XW0DXM6                       | Introduction of baricitinib into mouth and pharynx, external approach, new technology group 6                                                                                                                         | Procedure | ICD-10-PCS |
| XW0G7M6                       | Introduction of baricitinib into upper GI, via natural or artificial opening, new technology group 6                                                                                                                  | Procedure | ICD-10-PCS |
| XW0H7M6                       | Introduction of baricitinib into lower GI, via natural or artificial opening, new technology group 6                                                                                                                  | Procedure | ICD-10-PCS |
| Q0239                         | Injection, bamlanivimab-xxxx, 700 mg                                                                                                                                                                                  | Procedure | HCPCS      |
| M0239                         | intravenous infusion, bamlanivimab-xxxx, includes infusion and post administration monitoring                                                                                                                         | Procedure | HCPCS      |
| XW033F6                       | Introduction of Bamlanivimab Monoclonal Antibody into Peripheral Vein, Percutaneous Approach, New Technology Group 6                                                                                                  | Procedure | ICD-10-PCS |
| XW043F6                       | Introduction of Bamlanivimab Monoclonal Antibody into Central Vein, Percutaneous Approach, New Technology Group 6                                                                                                     | Procedure | ICD-10-PCS |
| Q0245                         | Injection, bamlanivimab and etesevimab, 2100 mg                                                                                                                                                                       | Procedure | HCPCS      |
| M0245                         | Intravenous infusion, bamlanivimab and etesevimab, includes infusion and post administration monitoring                                                                                                               | Procedure | HCPCS      |

| Code    | Description                                                                                                        | Code      |            |
|---------|--------------------------------------------------------------------------------------------------------------------|-----------|------------|
|         |                                                                                                                    | Category  | Code Type  |
| XW043E6 | Introduction of Etesevimab Monoclonal Antibody into Central Vein, Percutaneous Approach, New Technology Group 6    | Procedure | ICD-10-PCS |
| XW033E6 | Introduction of Etesevimab Monoclonal Antibody into Peripheral Vein, Percutaneous Approach, New Technology Group 6 | Procedure | ICD-10-PCS |
| Q0243   | Injection, casirivimab and imdevimab, 2400 mg                                                                      | Procedure | HCPCS      |
| M0243   | intravenous infusion, casirivimab and imdevimab includes infusion and post administration monitoring               | Procedure | HCPCS      |
| XW033G6 | Introduction of REGN-COV2 monoclonal antibody into peripheral vein, percutaneous approach, new technology group 6  | Procedure | ICD-10-PCS |
| XW043G6 | Introduction of REGN-COV2 monoclonal antibody into central vein, percutaneous approach, new technology group 6     | Procedure | ICD-10-PCS |
| J0456   | Injection, azithromycin, 500 mg                                                                                    | Procedure | HCPCS      |
| Q0144   | Azithromycin dihydrate, oral, capsules/powder, 1 g                                                                 | Procedure | HCPCS      |
