# Supplementary material for: Treatment and care received by children hospitalized with COVID-19 in a large hospital network in the United States, February 2020 to September 2021
Source: PubMed Central journal article supplement (PMC10335660; doi:10.1371/journal.pone.0288284), 2023-07-11
Supplement: pone.0288284.s003.pdf [file pone.0288284.s003.pdf]

S3 Appendix. Generic and Brand Names of Medical Products Used in this Analysis

| Generic Name                                                 | Brand Name                     |
|--------------------------------------------------------------|--------------------------------|
| Potential COVID-19 Treatments                                |                                |
| remdesivir                                                   | remdesivir                     |
| tocilizumab                                                  | Actemra                        |
| tocilizumab                                                  | Actemra ACTPen                 |
| sarilumab                                                    | Kevzara                        |
| eculizumab                                                   | Soliris                        |
| methylprednisolone acetate                                   | Depo-Medrol                    |
| methylprednisolone acetate                                   | methylprednisolone acetate     |
| methylprednisolone acetate                                   | P-Care D40                     |
| methylprednisolone acetate                                   | ReadySharp Methylprednisolone  |
| methylprednisolone acetate                                   | methylprednisolone acetate     |
| methylprednisolone acetate in sodium chloride,iso-osmotic/PF | methylpred ac(PF)-NaCl,iso-osm |
| methylprednisolone acetate in sterile water for injection    | methylprednisolone acet-water  |
| methylprednisolone acetate/bupivacaine HCl in sterile water  | methylprednisol ac-bupivac-wat |
| methylprednisolone sodium succinate                          | Solu-Medrol                    |
| methylprednisolone sodium succinate                          | methylprednisolone sodium succ |
| methylprednisolone sodium succinate/PF                       | Solu-Medrol (PF)               |
| lopinavir/ritonavir                                          | Kaletra                        |
| lopinavir/ritonavir                                          | lopinavir-ritonavir            |
| norepinephrine bitartrate                                    | Levophed (bitartrate)          |
| norepinephrine bitartrate                                    | norepinephrine bitart (bulk)   |
| norepinephrine bitartrate                                    | norepinephrine bitartrate      |
| norepinephrine bitartrate in 0.9 % sodium chloride           | norepinephrine bitartrate-NaCl |
| norepinephrine bitartrate in 5 % dextrose in water           | norepinephrine bitartrate-D5W  |
| dexamethasone                                                | Decadron                       |
| dexamethasone                                                | Dexabliss                      |
| dexamethasone                                                | dexamethasone                  |
| dexamethasone                                                | Dexamethasone Intensol         |
| dexamethasone                                                | DexPak 10 day                  |
| dexamethasone                                                | DexPak 13 Day                  |
| dexamethasone                                                | DexPak 6 Day                   |
| dexamethasone                                                | Dxevo                          |
| dexamethasone                                                | HiDex                          |
| dexamethasone                                                | TaperDex                       |
| dexamethasone acetate                                        | dexamethasone acetate (bulk)   |
| dexamethasone acetate, micronized                            | dexamethasone ac, micro (bulk) |
| dexamethasone isonicotinate                                  | dexamethasone isonic (bulk)    |
| dexamethasone sodium phosphate                               | dexamethasone sod phos (bulk)  |
| dexamethasone sodium phosphate in 0.9 % sodium chloride      | dexamethasone-0.9 % sod. chlor |
| dexamethasone, micronized                                    | dexamethasone,micronized(bulk) |
| dexamethasone/PF/norflurane/pentafluoropropane (HFC 245fa)   | DMT SUIK                       |

| <b>Generic Name</b>                           | <b>Brand Name</b>       |
|-----------------------------------------------|-------------------------|
| baricitinib                                   | Olumiant                |
| Bamlanivimab                                  | Bamlanivimab            |
| Etesevimab                                    | etesevimab              |
| casirivimab                                   | casirivimab (REGN10933) |
| imdevimab                                     | imdevimab (REGN10987)   |
| casirivimab (REGN10933)/imdevimab (REGN10987) | casirivimab-imdevimab   |
| casirivimab (REGN10933)/imdevimab (REGN10987) | REGEN-COV (EUA)         |
| casirivimab (REGN10933)/imdevimab (REGN10987) | casirivimab-imdevimab   |

### Antibiotics

|                                              |                                |
|----------------------------------------------|--------------------------------|
| azithromycin                                 | Azasite                        |
| azithromycin                                 | azithromycin                   |
| azithromycin                                 | azithromycin (bulk)            |
| azithromycin                                 | Zithromax                      |
| azithromycin                                 | Zithromax TRI-PAK              |
| azithromycin                                 | Zithromax Z-Pak                |
| azithromycin/chondroitin sulfate A sodium/PF | Klarity-A (azithro-chondr)(PF) |
| doxycycline calcium                          | Vibramycin                     |
| doxycycline hyclate                          | Acticlate                      |
| doxycycline hyclate                          | Doryx                          |
| doxycycline hyclate                          | Doryx MPC                      |
| doxycycline hyclate                          | Doxy-100                       |
| doxycycline hyclate                          | doxycycline hyclate            |
| doxycycline hyclate                          | doxycycline hyclate (bulk)     |
| doxycycline hyclate                          | Morgidox                       |
| doxycycline hyclate                          | Soloxide                       |
| doxycycline hyclate                          | Targadox                       |
| doxycycline hyclate                          | Vibramycin                     |
| doxycycline monohydrate                      | Avidoxy                        |
| doxycycline monohydrate                      | doxycycline monohydrate        |
| doxycycline monohydrate                      | doxycycline monohydrate (bulk) |
| doxycycline monohydrate                      | Mondoxyne NL                   |
| doxycycline monohydrate                      | Monodox                        |
| doxycycline monohydrate                      | Okebo                          |
| doxycycline monohydrate                      | Oracea                         |
| doxycycline monohydrate                      | Vibramycin                     |

### Antithrombotic Medications

|                           |                  |
|---------------------------|------------------|
| dalteparin sodium,porcine | Fragmin          |
| enoxaparin sodium         | enoxaparin       |
| alteplase                 | Activase         |
| alteplase                 | Cathflo Activase |
| reteplase                 | Retavase         |
| tenecteplase              | TNKase           |
| warfarin sodium           | Coumadin         |
| warfarin sodium           | Jantoven         |

**Generic Name****Brand Name**

---

|                                      |                                |
|--------------------------------------|--------------------------------|
| warfarin sodium                      | warfarin                       |
| warfarin sodium                      | warfarin (bulk)                |
| apixaban                             | Eliquis                        |
| apixaban                             | Eliquis DVT-PE Treat 30D Start |
| betrixaban maleate                   | Bevyxxa                        |
| edoxaban tosylate                    | Savaysa                        |
| fondaparinux sodium                  | Arixtra                        |
| fondaparinux sodium                  | fondaparinux                   |
| rivaroxaban                          | Xarelto                        |
| bivalirudin                          | bivalirudin                    |
| bivalirudin in 0.9 % sodium chloride | bivalirudin-0.9 % sodium chlor |
| dabigatran etexilate mesylate        | Pradaxa                        |
| abciximab                            | Reopro                         |
| anagrelide HCl                       | Agrylin                        |
| anagrelide HCl                       | anagrelide                     |
| aspirin                              | Adult Aspirin Regimen          |
| aspirin                              | Adult Low Dose Aspirin         |
| aspirin                              | Aspir-81                       |
| aspirin                              | aspirin                        |
| aspirin                              | aspirin (bulk)                 |
| aspirin                              | Aspirin Childrens              |
| aspirin                              | Aspirin Low Dose               |
| aspirin                              | Aspir-Low                      |
| aspirin                              | Aspir-Trin                     |
| aspirin                              | Bayer Advanced                 |
| aspirin                              | Bayer Aspirin                  |
| aspirin                              | Bayer Chewable Aspirin         |
| aspirin                              | Children's Aspirin             |
| aspirin                              | Durlaza                        |
| aspirin                              | E.C. Prin                      |
| aspirin                              | Ecotrin                        |
| aspirin                              | Ecotrin Low Strength           |
| aspirin                              | Enteric Coated Aspirin         |
| aspirin                              | Extra Strength Bayer           |
| aspirin                              | Lite Coat Aspirin              |
| aspirin                              | Lo-Dose Aspirin                |
| aspirin                              | St Joseph Aspirin              |
| aspirin                              | St. Joseph Aspirin             |
| aspirin/calcium carbonate            | Women's Aspirin with Calcium   |
| aspirin/dipyridamole                 | Aggrenox                       |
| aspirin/dipyridamole                 | aspirin-dipyridamole           |
| aspirin/omeprazole                   | aspirin-omeprazole             |
| aspirin/omeprazole                   | Yosprala                       |
| cangrelor tetrasodium                | Kengreal                       |

| <b>Generic Name</b>                                | <b>Brand Name</b>            |
|----------------------------------------------------|------------------------------|
| cilostazol                                         | cilostazol                   |
| clopidogrel bisulfate                              | clopidogrel                  |
| clopidogrel bisulfate                              | clopidogrel bisulfate (bulk) |
| clopidogrel bisulfate                              | Plavix                       |
| dipyridamole                                       | dipyridamole                 |
| dipyridamole                                       | dipyridamole (bulk)          |
| eptifibatide                                       | eptifibatide                 |
| eptifibatide                                       | Integrilin                   |
| prasugrel HCl                                      | Effient                      |
| prasugrel HCl                                      | prasugrel                    |
| ticagrelor                                         | Brilinta                     |
| tirofiban HCl monohydrate                          | Aggrastat Concentrate        |
| tirofiban HCl monohydrate in 0.9 % sodium chloride | Aggrastat in sodium chloride |
| vorapaxar sulfate                                  | Zontivity                    |

#### **Immune globulin (IVIg)**

|                                                              |                                |
|--------------------------------------------------------------|--------------------------------|
| immune globulin,gamm(IgG)/glycine/glucose/IgA 0 to 50 mcg/mL | Gammagard S-D (IgA < 1 mcg/mL) |
| immune globulin,gamm(IgG)/glycine/IgA greater than 50 mcg/mL | Gammagard Liquid               |
| immune globulin,gamm(IgG)/glycine/IgA greater than 50 mcg/mL | HyQvia IG Component            |
| immune globulin,gamm(IgG)/glycine/IgA greater than 50 mcg/mL | Cuvitru                        |
| immune globulin,gamm(IgG)/glycine/IgA greater than 50 mcg/mL | Bivigam                        |
| immune globulin,gamm(IgG)/maltose/IgA greater than 50 mcg/mL | Octagam                        |
| immune globulin,gamm(IgG)/sorbitol/glycin/IgA 0 to 50 mcg/mL | Gammaplex (with sorbitol)      |
| immune globulin,gamm(IgG)/sucrose/IgA greater than 50 mcg/mL | Carimune NF Nanofiltered       |
| immune globulin,gamma (IgG)/glycine/IgA 0 to 50 mcg/mL       | Gammaplex                      |
| immune globulin,gamma (IgG)/proline/IgA 0 to 50 mcg/mL       | Privigen                       |
| immune globulin,gamma (IgG)/proline/IgA 0 to 50 mcg/mL       | Hizentra                       |
| immune globulin,gamma (IgG)/sorbitol/IgA 0 to 50 mcg/mL      | Flebogamma DIF                 |
| immune globulin,gamma (IgG)-klhw human                       | Xembify                        |
| immune globulin,gamma (IgG)-slra human                       | Asceniv                        |
| immune globulin,gamma(IgG) human/hyaluronidase, human recom  | HyQvia                         |
| immune globulin,gamma(IgG)/glycine                           | Gamastan                       |
| immune globulin,gamma(IgG)/glycine                           | GamaSTAN S/D                   |
| immune globulin,gamma(IgG)/glycine/IgA average 46 mcg/mL     | Gamunex-C                      |
| immune globulin,gamma(IgG)/glycine/IgA average 46 mcg/mL     | Gammaked                       |
| immune globulin,gamma(IgG)-hipp human/maltose                | Cutaquig                       |
| immune globulin,gamma(IgG)-ifas human/glycine                | Panzyga                        |
